# Supplementary material for: Uncovering Hidden Mechanisms of Different Prescriptions Treatment for Osteoporosis via Novel Bioinformatics Model and Experiment Validation
Source: Front Cell Dev Biol. 2022 Feb 8;10:831894. doi: 10.3389/fcell.2022.831894 (PMC8861325; doi:10.3389/fcell.2022.831894)
Supplement: Supplementary file 1 [file Table2.xlsx]

## Sheet: 活性成分+HPLC
Molecule	Canonical SMILES	Formula	MW	GI absorption	Lipinski #violations	Bioavailability Score	source	Component
GSK-1	Oc1cc(O)c2c(c1)oc(cc2=O)c1ccc(c(c1)O)O	C15H10O6	286.24	High	0	0.55	Yinyanghuo	luteolin
GSK-2	Oc1ccc(cc1)c1cc(=O)c2c(o1)cc(cc2O)O	C15H10O5	270.24	High	0	0.55	Yinyanghuo	apigenin
GSK-3	Oc1cc(O)c2c(c1)oc(c(c2=O)O)c1ccc(c(c1)O)O	C15H10O7	302.24	High	0	0.55	Yinyanghuo	quercetin
GSK-4	CC1=CC[C@H](CC1)C(O)(C)C	C10H18O	154.25	High	0	0.55	Yinyanghuo	(L)-alpha-Terpineol
GSK-5	CCCCCCC/C=C/C=O	C10H18O	154.25	High	0	0.55	Yinyanghuo	dec-2-enal
GSK-6	O=C1C[C@@H]2C([C@@]1(C)CC2)(C)C	C10H16O	152.23	High	0	0.55	Yinyanghuo	CAM
GSK-7	C=C[C@@](CCC=C(C)C)(O)C	C10H18O	154.25	High	0	0.55	Yinyanghuo	(R)-linalool
GSK-8	C/C=C\c1ccc2c(c1)OCO2	C10H10O2	162.19	High	0	0.55	Yinyanghuo	Izosafrol
GSK-9	CC1=CC(=O)[C@H](CC1)C(C)C	C10H16O	152.23	High	0	0.55	Yinyanghuo	(6R)-6-isopropyl-3-methyl-1-cyclohex-2-enone
GSK-10	C=CCc1ccc(c(c1)OC)OC	C11H14O2	178.23	High	0	0.55	Yinyanghuo	Methyleugenol
GSK-11	O[C@H]1C[C@@H]2C([C@@]1(C)CC2)(C)C	C10H18O	154.25	High	0	0.55	Yinyanghuo	()-Borneol
GSK-14	C/C=C/c1cc(OC)c2c(c1)[C@@H](C)[C@@H](O2)c1ccc(c(c1)OC)OC	C21H24O4	340.41	High	0	0.55	Yinyanghuo	(2R,3R)-2-(3,4-dimethoxyphenyl)-7-methoxy-3-methyl-5-[(E)-prop-1-enyl]-2,3-dihydrobenzofuran
GSK-18	Oc1ccc(cc1)c1oc2cc(O)cc(c2c(=O)c1O)O	C15H10O6	286.24	High	0	0.55	Yinyanghuo	kaempferol
GSK-20	Cc1cc(O)c2c(c1)C(=O)c1c(C2=O)c(O)cc(c1)O	C15H10O5	270.24	High	0	0.55	Yinyanghuo	emodin
GSK-21	CC1=CC=CC(CC1=O)(C)C	C10H14O	150.22	High	0	0.55	Yinyanghuo	Eucarvone
GSK-23	O=C1O[C@H]2[C@H](C1=C)CC[C@@]([C@H]1[C@@H]2[C@](C)(O)CC1)(C)O	C15H22O4	266.33	High	0	0.55	Yinyanghuo	Magnograndiolide
GSK-24	CCCCCCO	C6H14O	102.17	High	0	0.55	Yinyanghuo	1-hexanol
GSK-25	C[C@H]1CC[C@@]2([C@@]3([C@H]1C[C@H](C2(C)C)CC3)C)O	C15H26O	222.37	High	0	0.55	Yinyanghuo	patchouli alcohol
GSK-26	COc1cc2C[C@@](O)(CO)[C@@H]([C@H](c2cc1O)c1ccc(c(c1)OC)O)CO	C20H24O7	376.4	High	0	0.55	Yinyanghuo	(+)-Cycloolivil
GSK-32	CC(=O)/C=C/[C@@H]1C(=CCCC1(C)C)C	C13H20O	192.3	High	0	0.55	Yinyanghuo	24190-29-2
GSK-34	Oc1ccc(cc1)/C=C/C(=O)c1ccc(cc1O)O	C15H12O4	256.25	High	0	0.55	Yinyanghuo	isoliquiritigenin
GSK-35	Oc1ccc(cc1)[C@@H]1CC(=O)c2c(O1)cc(cc2)O	C15H12O4	256.25	High	0	0.55	Yinyanghuo	DFV
GSK-36	C[C@@H]1CCC(=C(C)C)C(=O)C1	C10H16O	152.23	High	0	0.55	Yinyanghuo	Pulegone
GSK-37	O=C1[C@@]2(C)CC[C@@H](C1(C)C)C2	C10H16O	152.23	High	0	0.55	Yinyanghuo	(1S,4R)-fenchone
GSK-38	COc1cc(cc(c1O)OC)c1cc(=O)c2c(o1)cc(cc2O)O	C17H14O7	330.29	High	0	0.55	Yinyanghuo	tricin
GSK-41	COc1ccc(cc1)CC=C	C10H12O	148.2	High	0	0.55	Yinyanghuo	Terragon
GSK-44	COc1c(OC)cc(cc1OC)C	C10H14O3	182.22	High	0	0.55	Yinyanghuo	3,4,5-Trimethoxytoluene
GSK-46	COc1ccc2c(c1O)c1c(O)c(OC)cc3c1[C@H](C2)[N](C)(C)CC3	C20H24NO4	342.41	High	0	0.55	Yinyanghuo	magnoflorine
GSK-47	OC[C@@H]1O[C@@H](OCCc2ccc(cc2)O)[C@H]([C@@H]([C@@H]1O)O)O	C14H20O7	300.3	High	0	0.55	Yinyanghuo	salidroside
GSK-48	OCCc1ccc(cc1)O	C8H10O2	138.16	High	0	0.55	Yinyanghuo	Tyrosol
GSK-50	COc1cc(ccc1O)c1cc(=O)c2c(o1)cc(cc2O)O	C16H12O6	300.26	High	0	0.55	Yinyanghuo	Chryseriol
GSK-51	COc1ccc(cc1)c1cc(=O)c2c(o1)cc(cc2O)OC	C17H14O5	298.29	High	0	0.55	Yinyanghuo	Flavone der.
GSK-52	O=c1ccoc(c1O)C	C6H6O3	126.11	High	0	0.55	Yinyanghuo	Vetol
GSK-53	C/C=C\C(=O)C1=C(C)C=CCC1(C)C	C13H18O	190.28	High	0	0.55	Yinyanghuo	Damascenone
GSK-54	CC(=CCc1c(O)cc(c2c1oc(c1ccc(cc1)O)c(c2=O)O)O)C	C20H18O6	354.35	High	0	0.55	Yinyanghuo	8-Isopentenyl-kaempferol
GSK-55	C/C=C/c1cc(OC)c(cc1OC)OC	C12H16O3	208.25	High	0	0.55	Yinyanghuo	Azaron
GSK-57	COc1cc(OC)cc(c1)C	C9H12O2	152.19	High	0	0.55	Yinyanghuo	3,5-Dimethoxytoluene
GSK-58	C[C@@H]1CC[C@@H]([C@@H](C1)O)C(C)C	C10H20O	156.27	High	0	0.55	Yinyanghuo	Isomenthol
GSK-59	CCCCCCCCOC=O	C9H18O2	158.24	High	0	0.55	Yinyanghuo	Octyl formate
GSK-60	COc1cc(ccc1O)C[C@]1(O)CO[C@@H]([C@H]1CO)c1ccc(c(c1)OC)O	C20H24O7	376.4	High	0	0.55	Yinyanghuo	olivil
GSK-63	Oc1ccc2c(c1)oc(c(c2=O)O)c1cc(O)c(c(c1)O)O	C15H10O7	302.24	High	0	0.55	Yinyanghuo	Robinetin
GSK-66	COc1ccc(cc1)c1oc2c(CC=C(C)C)c(O)cc(c2c(=O)c1O)O	C21H20O6	368.38	High	0	0.55	Yinyanghuo	Anhydroicaritin
GSK-70	COc1ccc(cc1)c1oc2c(CCC(O)(C)C)c(O)cc(c2c(=O)c1O)O	C21H22O7	386.4	High	0	0.55	Yinyanghuo	wanepimedoside_qt
GSK-72	COc1c(O)cc(cc1O)c1cc(=O)c2c(o1)cc(c(c2)CC=C(C)C)O	C21H20O6	368.38	High	0	0.55	Yinyanghuo	wushanicariin_qt
GSK-73	CO[C@H]1CC=C2[C@]3(C1)N(CCCc1c3cc(OC)c(c1)OC)CC2	C20H27NO3	329.43	High	0	0.55	Yinyanghuo	C-Homoerythrinan, 1,6-didehydro-3,15,16-trimethoxy-, (3.beta.)-
GSK-74	COc1cc2C[C@@](C)(O)[C@H](C)Cc3c(c2c(c1OC)OC)c(OC)c1c(c3)OCO1	C23H28O7	416.46	High	0	0.55	Yinyanghuo	Besigomsin
GSK-75	Oc1cc(O)c2c(c1)oc(cc2=O)c1cc(C[C@@H](C(=C)C)O)c2c(c1)C=CC(O2)(C)C	C25H24O6	420.45	High	0	0.55	Yinyanghuo	Yinyanghuo A
GSK-76	CC(=CCc1cc(cc(c1O)C[C@H](C(=C)C)O)c1cc(=O)c2c(o1)cc(cc2O)O)C	C25H26O6	422.47	High	0	0.55	Yinyanghuo	Yinyanghuo B
GSK-77	Oc1cc(O)c2c(c1)oc(cc2=O)c1ccc2c(c1)C=CC(O2)(C)C	C20H16O5	336.34	High	0	0.55	Yinyanghuo	Yinyanghuo C
GSK-78	CC(=CCc1cc(ccc1O)c1cc(=O)c2c(o1)cc(cc2O)O)C	C20H18O5	338.35	High	0	0.55	Yinyanghuo	Yinyanghuo D
GSK-79	Oc1cc(O)c2c(c1)oc(cc2=O)c1cc(O)c2c(c1)C=CC(O2)(C)C	C20H16O6	352.34	High	0	0.55	Yinyanghuo	Yinyanghuo E
GSK-81	COc1ccc2c(c1OC)c1c(oc2=O)c(O)cc2c1C(=O)[N](CC2)(C)C	C20H20NO6	370.38	High	0	0.55	Yinyanghuo	6-hydroxy-11,12-dimethoxy-2,2-dimethyl-1,8-dioxo-2,3,4,8-tetrahydro-1H-isochromeno[3,4-h]isoquinolin-2-ium
GSK-82	CC/C=C/CCO[C@@H]1O[C@H](CO)[C@H]([C@@H]([C@H]1O)O)O	C12H22O6	262.3	High	0	0.55	Yinyanghuo	3-Hexenyl-beta-glucopyranoside
GSK-83	CC(=CCc1cc(ccc1O)c1cc(=O)c2c(o1)c(CC=C(C)C)c(cc2O)O)C	C25H26O5	406.47	High	0	0.55	Yinyanghuo	5,7,4'-trihydroxy8,3'-diprenylflavone
GSK-84	CC(=CCc1cccc2c1oc(cc2=O)c1ccccc1)C	C20H18O2	290.36	High	0	0.55	Yinyanghuo	8-(3-methylbut-2-enyl)-2-phenyl-chromone
GSK-86	COc1ccc(cc1)c1oc2c3CCC(Oc3cc(c2c(=O)c1O)O)(C)C	C21H20O6	368.38	High	0	0.55	Yinyanghuo	anhydroicaritin
GSK-88	COc1cc(O)c2c(c1CC=C(C)C)oc(cc2=O)c1ccc(cc1)O	C21H20O5	352.38	High	0	0.55	Yinyanghuo	artonin U
GSK-89	OC[C@H]([C@H](c1ccc(c(c1)OC)O)O)c1ccc(c(c1)OC)O	C17H20O6	320.34	High	0	0.55	Yinyanghuo	1,2-bis(4-hydroxy-3-methoxyphenyl)propan-1,3-diol
GSK-93	CC(Cc1occ(c1)[C@H]1CC=C([C@@H](C1)O)C)C	C15H22O2	234.33	High	0	0.55	Yinyanghuo	Bilobanol
GSK-95	COc1ccc(cc1)c1oc2c(CCC(OC)(C)C)c(O)cc(c2c(=O)c1O)O	C22H24O7	400.42	High	0	0.55	Yinyanghuo	brevicornin
GSK-99	CC(=O)CCCCCCCCCCCCC(=O)C	C16H30O2	254.41	High	0	0.55	Yinyanghuo	2,15-Hexadecanedione
GSK-101	COc1ccc(cc1)c1oc2c(CC=C(C)C)c(O)ccc2c(=O)c1O	C21H20O5	352.38	High	0	0.55	Yinyanghuo	Epimedin C_qt
GSK-103	O=c1cc(O)c(c(o1)C)O	C6H6O4	142.11	High	0	0.55	Yinyanghuo	epimedokoreanone A
GSK-110	C[C@@H]1CC[C@H]2[C@@H]1[C@H]1[C@H](C1(C)C)CC[C@]2(C)O	C15H26O	222.37	High	0	0.55	Yinyanghuo	globulol
GSK-115	OC[C@@H]1[C@H](O[C@@H]([C@H]1CO)c1cc(OC)c(c(c1)OC)O)c1cc(OC)c(c(c1)OC)O	C22H28O9	436.45	High	0	0.55	Yinyanghuo	Icaride A2
GSK-119	COc1cc2c(cc1O)ccc1c2c(OC)c(c(c1)O)OC	C17H16O5	300.31	High	0	0.55	Yinyanghuo	3,4,6-trimethoxyphenanthrene-2,7-diol
GSK-133	OCCCc1cc2c(c(c1)OC)O[C@H]([C@H]2CO)c1ccc(c(c1)OC)O	C20H24O6	360.4	High	0	0.55	Yinyanghuo	C20H24O6
GSK-136	Oc1cc(O)c2c(c1)oc(c(c2=O)O)c1ccc(c(c1)O)O	C15H10O7	302.24	High	0	0.55	Yinyanghuo	C15H10O7
GSK-137	COc1cc(cc(c1O)OC)c1cc(=O)c2c(o1)cc(cc2O)O	C17H14O7	330.29	High	0	0.55	Yinyanghuo	C17H14O7
GSK-138	OCC(C(c1ccc(c(c1)OC)O)O)c1ccc(c(c1)OC)O	C17H20O6	320.34	High	0	0.55	Yinyanghuo	C17H20O6
GSK-139	OC[C@H]1O[C@@H](OC(CCC2C(=CC(=O)CC2(C)C)C)C)[C@@H]([C@H]([C@@H]1O)O)O	C19H32O7	372.45	High	0	0.55	Yinyanghuo	C19H32O7
GSK-145	COc1cc(cc(c1O)OC)c1cc(=O)c2c(o1)c(CC=C(C)C)c(cc2O)O	C22H22O7	398.41	High	0	0.55	Yinyanghuo	C22H22O7
GSK-148	OC[C@H]1O[C@@H](Oc2cc3CCc4c(c3cc2OC)c(OC)c(c(c4)OC)OC)[C@@H]([C@H]([C@@H]1O)O)O	C24H30O10	478.49	High	0	0.55	Yinyanghuo	C24H30O10
GSK-154	OC[C@H]1O[C@@H](O[C@H]2CC(=C(C(C2)(C)C)CCC(=O)C)C)[C@@H]([C@H]([C@@H]1O)O)O	C19H32O7	372.45	High	0	0.55	Yinyanghuo	C19H32O7
GSK-155	OC[C@H]1O[C@@H](O[C@@H]2CCC(=C(C2(C)C)CCC(=O)C)C)[C@@H]([C@H]([C@@H]1O)O)O	C19H32O7	372.45	High	0	0.55	Yinyanghuo	C19H32O7
GSK-156	COc1ccc(cc1)C(=O)CO[C@@H]1O[C@@H](C)[C@@H]([C@H]([C@H]1O)O)O	C15H20O7	312.32	High	0	0.55	Yinyanghuo	C15H20O8
GSK-158	OC[C@@H]1[C@H](O[C@@H]([C@H]1CO)c1cc(OC)c(c(c1)OC)O)c1cc(OC)c(c(c1)OC)O	C22H28O9	436.45	High	0	0.55	Yinyanghuo	C22H28O9
GSK-162	COc1ccc(cc1)c1oc2c(CC=C(C)C)c(O)cc(c2c(=O)c1O)O	C21H20O6	368.38	High	0	0.55	Yinyanghuo	C21H20O6
GSK-171	OCc1ccc(o1)C=O	C6H6O3	126.11	High	0	0.55	Shudihuang	HMF
GSK-180	CC(=O)CCC1=C(C)CCCC1(C)C	C13H22O	194.31	High	0	0.55	Shudihuang	Dihydro-beta-ionone
GSK-183	OC[C@]12O[C@H]1[C@H]([C@H]1[C@@H]2[C@H](O)OC=C1)O	C9H12O5	200.19	High	0	0.55	Shudihuang	catapol_qt
GSK-191	CC(=O)O[C@@]1(C)CC[C@H]2[C@@H]1[C@@H](O)OC=C2	C11H16O4	212.24	High	0	0.55	Shudihuang	Ajugoside_qt
GSK-197	OCC1=C[C@H]([C@]2([C@@H]1[C@H](O)OC=C2)O)O	C9H12O5	200.19	High	0	0.55	Shudihuang	melittoside_qt
GSK-202	OCC[C@@H]1c2cocc2[C@H]([C@H]1O)O	C9H12O4	184.19	High	0	0.55	Shudihuang	Jiofuran
GSK-203	CO[C@H]1O[C@H]2OC[C@]3([C@@H]2[C@H](C1)[C@H](O)[C@@H]3Cl)O	C10H15ClO5	250.68	High	0	0.55	Shudihuang	jioglutin A
GSK-204	CO[C@@H]1O[C@H]2OC[C@]3([C@@H]2[C@H](C1)[C@H](O)[C@@H]3Cl)O	C10H15ClO5	250.68	High	0	0.55	Shudihuang	jioglutin B
GSK-205	CO[C@H]1O[C@H]2OC[C@]3([C@@H]2[C@H](C1)[C@H](O)[C@@H]3O)O	C10H16O6	232.23	High	0	0.55	Shudihuang	jioglutin C
GSK-206	CO[C@H]1O[C@H](OC)C[C@H]2[C@@H]1[C@]1(CO)O[C@@H]1[C@@H]2O	C11H18O6	246.26	High	0	0.55	Shudihuang	jioglutin D
GSK-207	CO[C@H]1O[C@@H](OC)C[C@H]2[C@@H]1[C@@](C)(O)C[C@@H]2O	C11H20O5	232.27	High	0	0.55	Shudihuang	jioglutin E
GSK-208	O=C1OC[C@@H]2[C@H](C1)[C@H](O)C[C@]2(C)O	C9H14O4	186.21	High	0	0.55	Shudihuang	jioglutolide
GSK-219	O[C@H]1O[C@@H]2OC[C@]3([C@@H]2[C@@H](C1)[C@H](O)[C@H]3Cl)O	C9H13ClO5	236.65	High	0	0.55	Shudihuang	Rehmaglutin B
GSK-220	OCC1=C[C@H]([C@H]2[C@]1(CO)OC(=O)C2)O	C9H12O5	200.19	High	0	0.55	Shudihuang	(3aS,4R,6aS)-4-hydroxy-6,6a-dimethylol-3a,4-dihydro-3H-cyclopenta[d]furan-2-one
GSK-223	OC[C@H]1O[C@@H](O[C@]2(C)CCCC([C@]2(O)/C=C/C(=O)C)(C)C)[C@@H]([C@H]([C@@H]1O)O)O	C19H32O8	388.45	High	0	0.55	Shudihuang	Rehmaionoside C
GSK-229	O[C@H]1[C@@H]2CCO[C@H]3[C@@H]2[C@]([C@@H]1O)(O)CO3	C9H14O5	202.2	High	0	0.55	Shudihuang	Rehmaglutin A
GSK-230	O[C@H]1[C@@H]2CCO[C@H]3[C@@H]2[C@]([C@@H]1Cl)(O)CO3	C9H13ClO4	220.65	High	0	0.55	Shudihuang	Rehmaglutin D
GSK-240	O[C@H]1[C@@H]2CCO[C@H]3C2[C@]([C@@H]1O)(O)CO3	C9H14O5	202.2	High	0	0.55	Shudihuang	C9H14O5
GSK-241	O[C@H]1[C@@H]2CCO[C@H]3[C@@H]2[C@]([C@@H]1Cl)(O)CO3	C9H13ClO4	220.65	High	0	0.55	Shudihuang	C9H13ClO4
GSK-243	O=c1cc[nH]c(=O)[nH]1	C4H4N2O2	112.09	High	0	0.55	Shudihuang	C4H4N2O2
GSK-249	O=C1N(Cc2ccccc2)C(=O)C2C(N1Cc1ccccc1)C2(Br)Br	C19H16Br2N2O2	464.15	High	0	0.55	Shudihuang	C15H24O4
GSK-251	CO[C@H]1O[C@@H]2OC[C@]3(C2[C@@H](C1)[C@H](O)[C@H]3Cl)O	C10H15ClO5	250.68	High	0	0.55	Shudihuang	C10H15ClO5
GSK-253	CO[C@@H]1O[C@@H]2OC[C@]3(C2[C@@H](C1)[C@H](O)[C@H]3Cl)O	C10H15ClO5	250.68	High	0	0.55	Shudihuang	C10H15ClO5
GSK-254	CO[C@H]1O[C@@H]2OC[C@]3(C2[C@@H](C1)[C@H](O)[C@H]3O)O	C10H16O6	232.23	High	0	0.55	Shudihuang	C10H16O6
GSK-258	Oc1cc2O[C@H](c3ccc(c(c3)O)O)[C@H](Cc2c(c1)O)O	C15H14O6	290.27	High	0	0.55	Gusuibu	(+)-catechin
GSK-262	Oc1ccc(cc1)[C@H]1CC(=O)c2c(O1)cc(cc2O)O	C15H12O5	272.25	High	0	0.55	Gusuibu	(2R)-5,7-dihydroxy-2-(4-hydroxyphenyl)chroman-4-one
GSK-263	COc1cc(ccc1O)[C@H]1OC[C@H]2[C@@H]1CO[C@@H]2c1ccc(c(c1)OC)O	C20H22O6	358.39	High	0	0.55	Gusuibu	Pinoresinol
GSK-264	OC[C@@H]([C@@H](Cc1ccc(c(c1)OC)O)CO)Cc1ccc(c(c1)OC)O	C20H26O6	362.42	High	0	0.55	Gusuibu	Secoisolariciresinol
GSK-265	Oc1cc2O/C(=C\c3ccc(c(c3)O)O)/C(=O)c2c(c1)O	C15H10O6	286.24	High	0	0.55	Gusuibu	Aureusidin
GSK-271	Oc1cc2O[C@H](CC(=O)c2c(c1)O)c1ccc(c(c1)O)O	C15H12O6	288.25	High	0	0.55	Gusuibu	Eriodyctiol (flavanone)
GSK-274	Oc1ccc(cc1)[C@@H]1CC(=O)c2c(O1)cc(cc2O)O	C15H12O5	272.25	High	0	0.55	Gusuibu	naringenin
GSK-278	Oc1cc2O[C@@H](CC(=O)c2c(c1)O)c1ccc(c(c1)O)O	C15H12O6	288.25	High	0	0.55	Gusuibu	eriodictyol
GSK-279	Oc1cc2O[C@H](c3ccc(c(c3)O)O)[C@@H](Cc2c(c1)O)O	C15H14O6	290.27	High	0	0.55	Gusuibu	(-)-epicatechin
GSK-281	COc1cc(O)ccc1[C@@H]1CC(=O)c2c(O1)c(C[C@H](C(=C)C)CC=C(C)C)c(cc2O)O	C26H30O6	438.51	High	0	0.55	Gusuibu	leachianone,a
GSK-282	Oc1ccc(cc1)[C@H]1Oc2cc(O)cc(c2C[C@H]1O)O	C15H14O5	274.27	High	0	0.55	Gusuibu	epi-Afzelechin
GSK-285	OC[C@@H]([C@H](c1cc2c(c(c1)OC)O[C@@H]([C@H]2CO)c1ccc(c(c1)OC)O)O)O	C20H24O8	392.4	High	0	0.55	Gusuibu	Threo-dihydroxydehydrodiconiferyl alcohol
GSK-300	O=C1C(=CC(=O)c2c1ccc(c2O)C1=C(C)C(=O)c2c(C1=O)c(O)ccc2)C	C22H14O6	374.34	High	0	0.55	Gusuibu	Chitranone
GSK-310	Oc1ccc(cc1)C(=O)c1c(O)cc(cc1O)O	C13H10O5	246.22	High	0	0.55	Gusuibu	(4-hydroxyphenyl)-(2,4,6-trihydroxyphenyl)methanone
GSK-311	COc1cc(O)c(c2c1C(=O)C[C@H](O2)c1ccc(cc1O)O)C[C@H](C(=C)C)CC=C(C)C	C26H30O6	438.51	High	0	0.55	Gusuibu	(2S)-2-(2,4-dihydroxyphenyl)-7-hydroxy-8-[(2R)-2-isopropenyl-5-methylhex-4-enyl]-5-methoxy-4-chromanone
GSK-313	COC(=O)C[C@@H]1C[C@H]([C@]2([C@@H]1CC=C(CC2)C(=O)OC)C)O	C16H24O5	296.36	High	0	0.55	Gusuibu	marioside_qt
GSK-316	CC(=CC[C@@H](C(=C)C)Cc1c(O)cc(c2c1O[C@@H](CC2=O)c1ccc(cc1O)O)O)C	C25H28O6	424.49	High	0	0.55	Gusuibu	Vexibinol
GSK-317	COc1cc(O)c(c(c1CC=C(C)C)O)C(=O)/C=C/c1ccc(cc1)O	C21H22O5	354.4	High	0	0.55	Gusuibu	xanthogalenol
GSK-323	NC(=N)NCCC[C@@H](C(=O)O)N	C6H14N4O2	174.2	High	0	0.55	Huangqi	L-
GSK-324	OC(=O)[C@@H]1CCCN1	C5H9NO2	115.13	High	0	0.55	Huangqi	Prolinum
GSK-328	COc1c(oc2c(c1=O)c(O)cc(c2)OC)c1ccc(cc1)O	C17H14O6	314.29	High	0	0.55	Huangqi	Jaranol
GSK-329	COc1cc(O)c2c(c1)oc(c(c2=O)O)c1ccc(cc1)O	C16H12O6	300.26	High	0	0.55	Huangqi	Rhamnocitrin
GSK-332	COc1cc(ccc1O)c1oc2cc(O)cc(c2c(=O)c1O)O	C16H12O7	316.26	High	0	0.55	Huangqi	isorhamnetin
GSK-334	COc1ccc2c(c1)OC[C@@H]1[C@H]2Oc2c1ccc(c2OC)OC	C18H18O5	314.33	High	0	0.55	Huangqi	3,9-di-O-methylnissolin
GSK-335	Oc1cccnc1C	C6H7NO	109.13	High	0	0.55	Huangqi	3-Hydroxy-2-picoline
GSK-340	COc1c(OC)ccc(c1O)c1coc2c(c1=O)ccc(c2)O	C17H14O6	314.29	High	0	0.55	Huangqi	7-hydroxy-3-(2-hydroxy-3,4-dimethoxy-phenyl)chromone
GSK-341	COc1ccc2c(c1)OC[C@H](C2)c1ccc(c(c1O)OC)OC	C18H20O5	316.35	High	0	0.55	Huangqi	7-O-methylisomucronulatol
GSK-342	OC[C@H]1O[C@@H](Oc2ccc3c(c2)OC[C@@H]2[C@H]3Oc3c2ccc(c3OC)OC)[C@@H]([C@H]([C@@H]1O)O)O	C23H26O10	462.45	High	0	0.55	Huangqi	9,10-dimethoxypterocarpan-3-O-β-D-glucoside
GSK-343	COc1ccc2c(c1OC)O[C@@H]1[C@H]2COc2c1ccc(c2)O	C17H16O5	300.31	High	0	0.55	Huangqi	(6aR,11aR)-9,10-dimethoxy-6a,11a-dihydro-6H-benzofurano[3,2-c]chromen-3-ol
GSK-349	COC(=O)c1cc(OC)c2c(c1c1c(cc(c3c1OCO3)OC)C(=O)OC)OCO2	C20H18O10	418.35	High	0	0.55	Huangqi	Bifendate
GSK-350	NCCCC(=O)O	C4H9NO2	103.12	High	0	0.55	Huangqi	gamma-aminobutyric acid
GSK-352	Oc1ccc(cc1)c1coc2c(c1=O)ccc(c2)O	C15H10O4	254.24	High	0	0.55	Huangqi	daidzein
GSK-353	OC[C@H]1O[C@@H](Oc2ccc3c(c2)occ(c3=O)c2ccc(cc2)OC)[C@@H]([C@H]([C@@H]1O)O)O	C22H22O9	430.4	High	0	0.55	Huangqi	Ononin
GSK-354	COc1ccc(cc1)c1coc2c(c1=O)ccc(c2)O	C16H12O4	268.26	High	0	0.55	Huangqi	formononetin
GSK-358	COc1cc(cc(c1O)OC)[C@H]1OC[C@H]2[C@@H]1CO[C@@H]2c1cc(OC)c(c(c1)OC)O	C22H26O8	418.44	High	0	0.55	Huangqi	(+)-Syringaresinol
GSK-360	COc1c(OC)ccc2c1C(=O)[C@H](CO2)c1ccc(cc1O)O	C17H16O6	316.31	High	0	0.55	Huangqi	isoflavanone
GSK-373	COc1c(ccc(c1O)OC)[C@H]1COc2c(C1)ccc(c2)O	C17H18O5	302.32	High	0	0.55	Huangqi	Mucronulatol
GSK-376	OC[C@H]1[C@H](CO[C@@H]1c1ccc(c(c1)OC)O)Cc1ccc(c(c1)OC)O	C20H24O6	360.4	High	0	0.55	Huangqi	Lariciresinol
GSK-377	COc1ccc(cc1O)c1coc2c(c1=O)ccc(c2)O	C16H12O5	284.26	High	0	0.55	Huangqi	Calycosin
GSK-383	O[C@H]1[C@H](C)O[C@H]([C@@H]([C@@H]1O)O)O	C6H12O5	164.16	High	0	0.55	Huangqi	RAM
GSK-388	NC(=O)C[C@@H](C(=O)O)N	C4H8N2O3	132.12	High	0	0.55	Huangqi	Crystal VI
GSK-389	OC(=O)C[N](C)(C)C	C5H12NO2	118.15	High	0	0.55	Huangqi	betaine
GSK-390	O=c1ccc2c(o1)cccc2	C9H6O2	146.14	High	0	0.55	Huangqi	coumarin
GSK-395	Oc1ccc(cc1)/C=C\C(=O)c1ccc(cc1O)O	C15H12O4	256.25	High	0	0.55	Huangqi	(Z)-1-(2,4-dihydroxyphenyl)-3-(4-hydroxyphenyl)prop-2-en-1-one
GSK-396	COc1c(OC)ccc(c1O)[C@@H]1COc2c(C1)ccc(c2)O	C17H18O5	302.32	High	0	0.55	Huangqi	(3R)-3-(2-hydroxy-3,4-dimethoxyphenyl)chroman-7-ol
GSK-400	COc1cc(O)c2c(c1)OCc1c2oc2c1c(O)cc(c2)OC	C17H14O6	314.29	High	0	0.55	Huangqi	1,7-Dihydroxy-3,9-dimethoxy pterocarpene
GSK-403	COc1ccc2c(c1)OC[C@@H]1[C@H]2Oc2c1ccc(c2OC)OC	C18H18O5	314.33	High	0	0.55	Huangqi	C18H18O5
GSK-404	COc1cc(cc(c1O)OC)C1OCC2C1COC2c1cc(OC)c(c(c1)OC)O	C22H26O8	418.44	High	0	0.55	Huangqi	C22H26O8
GSK-405	COc1ccc(cc1O)c1coc2c(c1=O)ccc(c2)O	C16H12O5	284.26	High	0	0.55	Huangqi	C16H12O5
GSK-413	NC[CH][CH]C(=O)O	C4H7NO2	101.1	High	0	0.55	Huangqi	C4H9NO2
GSK-427	Oc1cc(O)c2=CC(=C([O]=c2c1)c1ccc(c(c1)O)O)O	C15H11O6	287.24	High	0	0.55	Danshen	cyanidol
GSK-430	N[C@H](C(=O)O)Cc1ccccc1	C9H11NO2	165.19	High	0	0.55	Danshen	PHA
GSK-431	C[C@@H](C(=O)O)N	C3H7NO2	89.09	High	0	0.55	Danshen	LPG
GSK-432	NCC(=O)O	C2H5NO2	75.07	High	0	0.55	Danshen	GLY
GSK-434	NCCCC[C@@H](C(=O)O)N	C6H14N2O2	146.19	High	0	0.55	Danshen	L-Lysin
GSK-435	OC(=O)[C@H](Cc1ccc(cc1)O)N	C9H11NO3	181.19	High	0	0.55	Danshen	DTY
GSK-437	N[C@H](C(=O)O)C(C)C	C5H11NO2	117.15	High	0	0.55	Danshen	L-Valin
GSK-438	CC[C@@H]([C@@H](C(=O)O)N)C	C6H13NO2	131.17	High	0	0.55	Danshen	L-Ile
GSK-439	N[C@H](C(=O)O)Cc1c[nH]cn1	C6H9N3O2	155.15	High	0	0.55	Danshen	Istidina
GSK-441	C/C(=C\COC(=O)C)/CCC=C(C)C	C12H20O2	196.29	High	0	0.55	Danshen	NERYLACETATE
GSK-446	COc1cc(O)c2c(c1)C(=O)c1c(C2=O)c(O)cc(c1)C	C16H12O5	284.26	High	0	0.55	Danshen	Physcion
GSK-454	CC1=CC[C@@](CC1)(O)C(C)C	C10H18O	154.25	High	0	0.55	Danshen	(R)-p-Menth-1-en-4-ol
GSK-456	CC1=C[C@@H]2[C@@H](CC1)[C@](C)(O)CC[C@H]2C(C)C	C15H26O	222.37	High	0	0.55	Danshen	(1R,4S,4aR,8aR)-4-isopropyl-1,6-dimethyl-3,4,4a,7,8,8a-hexahydro-2H-naphthalen-1-ol
GSK-458	C=C[C@](OC(=O)C)(CCC=C(C)C)C	C12H20O2	196.29	High	0	0.55	Danshen	[(3R)-3,7-dimethylocta-1,6-dien-3-yl] acetate
GSK-462	O=Cc1ccc(c(c1)O)O	C7H6O3	138.12	High	0	0.55	Danshen	protocatechualdehyde
GSK-465	CC(=CCOc1c2ccoc2cc2c1ccc(=O)o2)C	C16H14O4	270.28	High	0	0.55	Danshen	isoimperatorin
GSK-468	C=C1CC[C@@H]2[C@H]([C@H]3[C@H]1CC[C@]3(C)O)C2(C)C	C15H24O	220.35	High	0	0.55	Danshen	1H-Cycloprop(e)azulen-7-ol, decahydro-1,1,7-trimethyl-4-methylene-, (1aR-(1aalpha,4aalpha,7beta,7abeta,7balpha))-
GSK-469	O=C1C[C@H]2C(C)(C)CCC[C@]2(c2c1cc(C(C)C)c(c2)O)C	C20H28O2	300.44	High	0	0.55	Danshen	sugiol
GSK-472	O=C1c2c3C=CCC(c3ccc2c2c(C1=O)c(C)co2)(C)C	C19H16O3	292.33	High	0	0.55	Danshen	Dehydrotanshinone II A
GSK-476	O[C@@H]1C[C@H]2C([C@]1(C)CC2)(C)C	C10H18O	154.25	High	0	0.55	Danshen	[(1S)-endo]-(-)-Borneol
GSK-478	OC[C@@H](C(=O)O)N	C3H7NO3	105.09	High	0	0.55	Danshen	L-Serin
GSK-479	C[C@H]([C@@H](C(=O)O)N)O	C4H9NO3	119.12	High	0	0.55	Danshen	Threonin
GSK-485	C[C@@H]1CC[C@@H]2[C@@]31CC[C@]([C@H](C3)C2(C)C)(C)O	C15H26O	222.37	High	0	0.55	Danshen	(-)-Epicedrol
GSK-486	N[C@H](C(=O)O)CC(C)C	C6H13NO2	131.17	High	0	0.55	Danshen	Leucinum
GSK-487	CSCC[C@@H](C(=O)O)N	C5H11NO2S	149.21	High	0	0.55	Danshen	h-Met-h
GSK-489	Cc1cc(O)c2c(c1)C(=O)c1c(C2=O)cccc1O	C15H10O4	254.24	High	0	0.55	Danshen	1,5-Dihydroxy-3-methylanthraquinone
GSK-492	O=C1CCC(c2c1c1c(cc2)cc(c(c1O)O)C(C)C)(C)C	C19H22O3	298.38	High	0	0.55	Danshen	5,6-dihydroxy-7-isopropyl-1,1-dimethyl-2,3-dihydrophenanthren-4-one
GSK-493	O=C1c2c3CCC=C(c3ccc2c2c(C1=O)c(C)co2)C	C18H14O3	278.3	High	0	0.55	Danshen	1,2-DT-Quinone
GSK-494	CC(C1=Cc2ccc3c(c2C(=O)C1=O)C=CCC3(C)C)C	C19H20O2	280.36	High	0	0.55	Danshen	Dehydromiltirone
GSK-497	CC(C1=Cc2ccc3c(c2C(=O)C1=O)cccc3C)C	C18H16O2	264.32	High	0	0.55	Danshen	2-isopropyl-8-methylphenanthrene-3,4-dione
GSK-499	OCC(=O)c1ccc(c(c1)O)O	C8H8O4	168.15	High	0	0.55	Danshen	1-(3,4-dihydroxyphenyl)-2-hydroxyethanone
GSK-500	O=C[C@H](/C=C(/CCC=C(C)C)\C)O	C11H18O2	182.26	High	0	0.55	Danshen	3,7-dimethylocta-2,6-dien-1-yl formate
GSK-501	O=C1c2c3[C@H](O)CCC(c3ccc2c2c(C1=O)c(C)co2)(C)C	C19H18O4	310.34	High	0	0.55	Danshen	3α-hydroxytanshinoneⅡa
GSK-502	O[C@H]1CCc2c(C1(C)C)ccc1c2C(=O)C(=O)c2c1occ2C	C19H18O4	310.34	High	0	0.55	Danshen	3beta-Hydroxytanshinone IIA
GSK-503	CC([C@@]12CC[C@@]([C@H]2C1)(C)O)C	C10H18O	154.25	High	0	0.55	Danshen	(1R,4R,5S)-1-isopropyl-4-methyl-4-bicyclo[3.1.0]hexanol
GSK-505	CC(C1=Cc2ccc3c(c2C(=O)C1=O)CCCC3=C)C	C18H18O2	266.33	High	0	0.55	Danshen	4-methylenemiltirone
GSK-506	OCCCc1cc(OC)c2c(c1)c(C=O)c(o2)c1ccc(c(c1)OC)O	C20H20O6	356.37	High	0	0.55	Danshen	2-(4-hydroxy-3-methoxyphenyl)-5-(3-hydroxypropyl)-7-methoxy-3-benzofurancarboxaldehyde
GSK-510	O[C@H]1C[C@H]2C(C)(C)CCC[C@@]2(C2=C1C=C(C(C)C)C(=O)C2=O)C	C20H28O3	316.43	High	0	0.55	Danshen	(4bS,8aS,10S)-10-hydroxy-2-isopropyl-4b,8,8-trimethyl-5,6,7,8a,9,10-hexahydrophenanthrene-3,4-dione
GSK-512	C=C1CC[C@@H]2O[C@@]2(CC[C@@H]2[C@H]1CC2(C)C)C	C15H24O	220.35	High	0	0.55	Danshen	TNP00297
GSK-513	O=Cc1cccc2c1ccc1c2C(=O)C(=O)c2c1occ2C	C18H10O4	290.27	High	0	0.55	Danshen	formyltanshinone
GSK-514	O[C@H]1CCc2c(C1=C)ccc1c2C(=O)C(=O)c2c1occ2C	C18H14O4	294.3	High	0	0.55	Danshen	3-beta-Hydroxymethyllenetanshiquinone
GSK-516	O=C1c2c3CCCC(=C)c3ccc2c2c(C1=O)c(C)co2	C18H14O3	278.3	High	0	0.55	Danshen	Methylenetanshinquinone
GSK-518	O=C1[C@@H]2OC(=O)[C@]3([C@@H]1C(C)(C)CCC3)c1c2cc(C(C)C)c(c(c1=O)C(=O)C)O	C23H26O6	398.45	High	0	0.55	Danshen	przewalskin a
GSK-519	CC(C1=C[C@]23[C@](C1=O)(O)C(=O)O[C@@H]3C1=CCCC([C@H]1CC2)(C)C)C	C20H26O4	330.42	High	0	0.55	Danshen	przewalskin b
GSK-520	CO[C@@H]1C[C@@H]2C(=CCCC2(C)C)Cc2c1cc(C(C)C)c(c2O)O	C21H30O3	330.46	High	0	0.55	Danshen	przewalskin c
GSK-521	CC(c1cc2CC[C@H]3C(=Cc2c(c1O)O)C=CCC3(C)C)C	C20H26O2	298.42	High	0	0.55	Danshen	przewalskin d
GSK-522	OCc1coc2c1C(=O)C(=O)c1c2ccc2c1CCCC2(C)C	C19H18O4	310.34	High	0	0.55	Danshen	Przewaquinone A
GSK-523	OCc1coc2c1C(=O)C(=O)c1c2ccc2c1cccc2C	C18H12O4	292.29	High	0	0.55	Danshen	Przewaquinone B
GSK-524	O=C1c2c3CCC[C@@](c3ccc2c2c(C1=O)c(C)co2)(C)O	C18H16O4	296.32	High	0	0.55	Danshen	przewaquinone c
GSK-525	O[C@@H]1CCc2c([C@]1(C)O)ccc1c2C(=O)C(=O)c2c1occ2C	C18H16O5	312.32	High	0	0.55	Danshen	(6S,7R)-6,7-dihydroxy-1,6-dimethyl-8,9-dihydro-7H-naphtho[8,7-g]benzofuran-10,11-dione
GSK-526	OC[C@@H]1[C@H](O)CCc2c1ccc1c2C(=O)C(=O)c2c1occ2C	C18H16O5	312.32	High	0	0.55	Danshen	przewaquinone f
GSK-528	CC([C@@H]1[C@H]2OCC(c3c2c2c(C1=O)ccc(c2cc3)C)(C)C)C	C21H24O2	308.41	High	0	0.55	Danshen	saloilenone
GSK-531	CC(=CCCc1c(C)ccc2c1C(=O)C(=O)C(=C2)C(C)C)C	C20H24O2	296.4	High	0	0.55	Danshen	Saprothoquinone
GSK-532	C=C[C@@](CC[C@@H]1[C@](C)(O)CC[C@@H]2[C@]1(C)CCCC2(C)C)(O)C	C20H36O2	308.5	High	0	0.55	Danshen	sclareol
GSK-533	O=C[C@@]1(C)CCCc2c1ccc1c2C(=O)C(=O)c2c1occ2C	C19H16O4	308.33	High	0	0.55	Danshen	tanshinaldehyde
GSK-534	OCc1cccc2c1ccc1c2C(=O)C(=O)c2c1occ2C	C18H12O4	292.29	High	0	0.55	Danshen	Tanshinol A
GSK-538	CC(=C)CCCc1c(C)ccc2c1C(=O)C(=O)C(=C2)C(C)C	C20H24O2	296.4	High	0	0.55	Danshen	Aethiopinone
GSK-540	O=C1O[C@H]2C[C@H]3[C@]1(CCCC3(C)C)c1c2cc(c(c1O)O)C(C)C	C20H26O4	330.42	High	0	0.55	Danshen	carnosol
GSK-547	C[C@H]1CO[C@]2(C1)OCC(=O)c1c2ccc2c1cccc2C	C18H18O3	282.33	High	0	0.55	Danshen	danshenspiroketallactone
GSK-548	C[C@@H]1CO[C@@]2(C1)OC(=O)c1c2ccc2c1CCCC2(C)C	C18H22O3	286.37	High	0	0.55	Danshen	danshenspiroketallactoneii
GSK-553	C[C@H]1COc2c1oc(=O)c1c2ccc2c1cccc2C	C17H14O3	266.29	High	0	0.55	Danshen	dihydrotanshinlactone
GSK-558	C[C@H]1CO[C@]2(C1)OCC(=O)[C@H]1[C@H]2C=Cc2c1cccc2C	C18H20O3	284.35	High	0	0.55	Danshen	epidanshenspiroketallactone
GSK-563	OC[C@@]1(C)CCCc2c1ccc1c2C(=O)c2c(C1=O)c(co2)C	C19H18O4	310.34	High	0	0.55	Danshen	isotanshinone iib
GSK-564	O=C1c2c3CCCC(c3ccc2C(=O)c2c1occ2C)(C)C	C19H18O3	294.34	High	0	0.55	Danshen	Isotanshinone II
GSK-565	Cc1coc2c1C(=O)c1c(C2=O)c2cccc(c2cc1)C	C18H12O3	276.29	High	0	0.55	Danshen	Isotanshinone I
GSK-568	COC(=O)[C@@H](Cc1ccc(c(c1)O)O)OC(=O)/C=C\c1ccc(c(c1)O)O	C19H18O8	374.34	High	0	0.55	Danshen	methylrosmarinate
GSK-569	COC(=O)[C@@]1(C)CCCc2c1ccc1c2C(=O)C(=O)c2c1occ2C	C20H18O5	338.35	High	0	0.55	Danshen	methyltanshinonate
GSK-570	CC(C1=Cc2ccc(c3c2[C@@](C1=O)(O)C(C)(C)CCC3)C)C	C20H26O2	298.42	High	0	0.55	Danshen	microstegiol
GSK-573	O=c1cc2c(cc(c1O)C)[C@H]1OC[C@]32CCCC([C@@H]3C1)(C)C	C19H24O3	300.39	High	0	0.55	Danshen	miltipolone
GSK-574	CC(C1=Cc2ccc3c(c2C(=O)C1=O)CCCC3(C)C)C	C19H22O2	282.38	High	0	0.55	Danshen	Miltirone
GSK-578	Cc1cc2[C@H]3OC[C@@]4(c2cc1O)[C@@H](C3)C(C)(C)CCC4	C18H24O2	272.38	High	0	0.55	Danshen	przewalskin
GSK-579	O=C1c2c3CCCC(=O)c3ccc2c2c(C1=O)c(C)co2	C17H12O4	280.27	High	0	0.55	Danshen	1-methyl-8,9-dihydro-7H-naphtho[5,6-g]benzofuran-6,10,11-trione
GSK-585	O=C1OC[C@@]23[C@H]1C=CC[C@]3(O)[C@@]1(C(=CC2)C(=O)O[C@H](C1)c1cocc1)C	C20H20O6	356.37	High	0	0.55	Danshen	salviacoccin
GSK-595	CC(=O)C1=C[C@@H]2C=CC3=C([C@H]2C=C1O)CCCC3(C)C	C18H22O2	270.37	High	0	0.55	Danshen	salvilenone Ⅰ
GSK-596	O[C@@H]1CC(C)(C)[C@@H]2[C@](C1)(C)c1cc(O)c(cc1CC2)C(C)C	C20H30O2	302.45	High	0	0.55	Danshen	salviol
GSK-597	O=c1c(O)cc2c(cc1C)ccc1c2CCCC1(C)C	C18H20O2	268.35	High	0	0.55	Danshen	salviolone
GSK-601	O=C1C[C@H]2C(C)(C)CCC[C@@]2(c2c1cc(C(C)C)c(c2)O)C	C20H28O2	300.44	High	0	0.55	Danshen	NSC 122421
GSK-602	OC[C@]1(O)CCCc2c1ccc1c2C(=O)C(=O)c2c1occ2C	C18H16O5	312.32	High	0	0.55	Danshen	(6S)-6-hydroxy-1-methyl-6-methylol-8,9-dihydro-7H-naphtho[8,7-g]benzofuran-10,11-quinone
GSK-603	O[C@H]1CCc2c([C@@]1(C)O)ccc1c2C(=O)C(=O)c2c1occ2C	C18H16O5	312.32	High	0	0.55	Danshen	Tanshindiol B
GSK-604	O[C@@H]1CCc2c([C@@]1(C)O)ccc1c2C(=O)C(=O)c2c1occ2C	C18H16O5	312.32	High	0	0.55	Danshen	Przewaquinone E
GSK-605	Cc1cccc2c1ccc1c2c(=O)oc2c1occ2C	C17H12O3	264.28	High	0	0.55	Danshen	Tanshilactone
GSK-606	O=C1c2c3CCCC(c3ccc2c2c(C1=O)c(C)co2)(C)C	C19H18O3	294.34	High	0	0.55	Danshen	tanshinone iia
GSK-607	OC[C@@]1(C)CCCc2c1ccc1c2C(=O)C(=O)c2c1occ2C	C19H18O4	310.34	High	0	0.55	Danshen	(6S)-6-(hydroxymethyl)-1,6-dimethyl-8,9-dihydro-7H-naphtho[8,7-g]benzofuran-10,11-dione
GSK-609	Cc1coc2c1C(=O)C(=O)c1c2ccc2c1cccc2C	C18H12O3	276.29	High	0	0.55	Danshen	tanshinone i
GSK-612	C=C1CC[C@H]2[C@@H](C1)[C@H](CC[C@]2(C)O)C(C)C	C15H26O	222.37	High	0	0.55	Danshen	β-cadinol
GSK-619	Cc1cc(O)c2c(c1)C(=O)c1c(C2=O)cccc1O	C15H10O4	254.24	High	0	0.55	Danshen	C15H10O4
GSK-623	OCC1(O)CCCc2c1ccc1c2C(=O)C(=O)c2c1occ2C	C18H16O5	312.32	High	0	0.55	Danshen	C18H16O5
GSK-624	Cc1cccc2c1ccc1c2c(=O)oc2c1occ2C	C17H12O3	264.28	High	0	0.55	Danshen	C17H12O3
GSK-627	Cc1coc2c1C(=O)C(=O)c1c2ccc2c1cccc2C	C18H12O3	276.29	High	0	0.55	Danshen	C18H12O3
GSK-628	O=C1c2c3CCCC(c3ccc2c2c(C1=O)c(C)co2)(C)C	C19H18O3	294.34	High	0	0.55	Danshen	C19H18O3
GSK-629	OC[C@@]1(C)CCCc2c1ccc1c2C(=O)C(=O)c2c1occ2C	C19H18O4	310.34	High	0	0.55	Danshen	C19H18O4
GSK-632	O=C1CCC(c2c1c1c(cc2)cc(c(c1O)O)C(C)C)(C)C	C19H22O3	298.38	High	0	0.55	Danshen	C19H22O3
GSK-633	CC(C1=Cc2ccc3c(c2C(=O)C1=O)CCCC3(C)C)C	C19H22O2	282.38	High	0	0.55	Danshen	C19H22O2
GSK-634	O=CC1(C)CCCc2c1ccc1c2C(=O)C(=O)c2c1occ2C	C19H16O4	308.33	High	0	0.55	Danshen	C19H16O4
GSK-635	O=C1c2c3CCCC(=O)c3ccc2c2c(C1=O)c(C)co2	C17H12O4	280.27	High	0	0.55	Danshen	C17H12O4
GSK-637	CC(C1=Cc2ccc3c(c2C(=O)C1=O)CCCC3=C)C	C18H18O2	266.33	High	0	0.55	Danshen	C18H18O2
GSK-638	O=C1c2c3CCCC(=C)c3ccc2c2c(C1=O)c(C)co2	C18H14O3	278.3	High	0	0.55	Danshen	C18H14O3
GSK-640	Cc1coc2c1C(=O)c1c(C2=O)c2cccc(c2cc1)C	C18H12O3	276.29	High	0	0.55	Danshen	C18H12O3
GSK-642	CC(=CCOc1c2ccoc2cc2c1ccc(=O)o2)C	C16H14O4	270.28	High	0	0.55	Danshen	C16H14O4
GSK-645	O=C1C[C@H]2C(C)(C)CCC[C@@]2(c2c1cc(C(C)C)c(c2)O)C	C20H28O2	300.44	High	0	0.55	Danshen	C20H28O2
GSK-649	O[C@@H]1CCc2c(C1(C)C)ccc1c2C(=O)C(=O)c2c1occ2C	C19H18O4	310.34	High	0	0.55	Danshen	C19H18O4
GSK-650	O[C@H]1C[C@H]2C(C)(C)CCC[C@@]2(C2=C1C=C(C(C)C)C(=O)C2=O)C	C20H28O3	316.43	High	0	0.55	Danshen	C20H28O3
GSK-653	CC(=O)c1cc2ccc3c(c2cc1O)CCCC3(C)C	C18H20O2	268.35	High	0	0.55	Danshen	C18H20O2
GSK-655	O=Cc1cccc2c1ccc1c2C(=O)C(=O)c2c1occ2C	C18H10O4	290.27	High	0	0.55	Danshen	C18H10O4
GSK-656	O[C@H]1CCc2c([C@@]1(C)O)ccc1c2C(=O)C(=O)c2c1occ2C	C18H16O5	312.32	High	0	0.55	Danshen	C18H16O5
GSK-657	O[C@H]1CCc2c([C@@]1(C)O)ccc1c2C(=O)C(=O)c2c1occ2C	C18H16O5	312.32	High	0	0.55	Danshen	C18H16O5
GSK-659	O=C1C(=O)c2c(C)coc2c2c1ccc1c2cccc1C	C18H12O3	276.29	High	0	0.55	Danshen	C19H18O3
GSK-660	OCC1(C)CCCc2c1ccc1c2C(=O)c2c(C1=O)c(co2)C	C19H18O4	310.34	High	0	0.55	Danshen	C19H18O4
GSK-661	C[C@H]1CO[C@@]2(C1)OC(=O)c1c2ccc2c1cccc2C	C17H16O3	268.31	High	0	0.55	Danshen	C17H16O3
GSK-662	Cc1cc([O])cc(c1)O	C7H7O2	123.13	High	0	0.55	Muer	C7H8O2
GSK-668	COC(=O)c1c(C)cc(c(c1O)C)OC(=O)c1c(C)cc(c(c1O)C=O)O	C19H18O8	374.34	High	0	0.55	Muer	C19H18O8
GSK-670	OCCc1sc[n+](c1C)Cc1cnc(nc1N)C	C12H17N4OS	265.35	High	0	0.55	Muer	C12H17N4OS(+)
GSK-689	CCCCCC=CC=CC=O	C10H16O	152.23	High	0	0.55	Huangguazi	2，4一癸二烯醛
GSK-001	COc1ccc(cc1)c1oc2c(CC=C(C)C)c(OC3OC(CO)C(C(C3O)O)O)cc(c2c(=O)c1OC1OC(C)C(C(C1O)O)O)O	C33H40O15	676.66	Low	3	0.17
GSK-002	OCC1OC(Oc2ccc3c(c2)occ(c3=O)c2ccc(c(c2)O)OC)C(C(C1O)O)O	C22H22O10	446.4	Low	0	0.55
GSK-003	O=C1c2c3CCCC(c3ccc2c2c(C1=O)c(C)co2)(C)C	C19H18O3	294.34	High	0	0.55
GSK-004	OCC1OC(Oc2cc(O)c3c(c2)OC(CC3=O)c2ccc(cc2)O)C(C(C1O)O)OC1OC(C)C(C(C1O)O)O	C27H32O14	580.53	Low	3	0.17
GSK-005	OCC1OC(OC2CC3C4(C5(C2C(C)(C)C(CC5)OC2OCC(C(C2O)O)O)C4)CCC2(C3(C)CC(C2C2(C)CCC(O2)C(O)(C)C)O)C)C(C(C1O)O)O	C41H68O14	784.97	Low	3	0.17
GSK-006	OCC1OC(OCCc2ccc(c(c2)O)O)C(C(C1OC(=O)C=Cc1ccc(c(c1)O)O)OC1OC(C)C(C(C1O)O)O)O	C29H36O15	624.59	Low	3	0.17
XLGB-3	OCCCc1cc2c(c(c1)OC)O[C@H]([C@H]2CO)c1ccc(c(c1)OC)O	C20H24O6	360.4	High	0	0.55	Yinyanghuo	C20H24O6
XLGB-6	Oc1cc(O)c2c(c1)oc(c(c2=O)O)c1ccc(c(c1)O)O	C15H10O7	302.24	High	0	0.55	Yinyanghuo	C15H10O7
XLGB-7	COc1cc(cc(c1O)OC)c1cc(=O)c2c(o1)cc(cc2O)O	C17H14O7	330.29	High	0	0.55	Yinyanghuo	C17H14O7
XLGB-8	OCC(C(c1ccc(c(c1)OC)O)O)c1ccc(c(c1)OC)O	C17H20O6	320.34	High	0	0.55	Yinyanghuo	C17H20O6
XLGB-9	OC[C@H]1O[C@@H](OC(CCC2C(=CC(=O)CC2(C)C)C)C)[C@@H]([C@H]([C@@H]1O)O)O	C19H32O7	372.45	High	0	0.55	Yinyanghuo	C19H32O7
XLGB-15	COc1cc(cc(c1O)OC)c1cc(=O)c2c(o1)c(CC=C(C)C)c(cc2O)O	C22H22O7	398.41	High	0	0.55	Yinyanghuo	C22H22O7
XLGB-18	OC[C@H]1O[C@@H](Oc2cc3CCc4c(c3cc2OC)c(OC)c(c(c4)OC)OC)[C@@H]([C@H]([C@@H]1O)O)O	C24H30O10	478.49	High	0	0.55	Yinyanghuo	C24H30O10
XLGB-24	OC[C@H]1O[C@@H](O[C@H]2CC(=C(C(C2)(C)C)CCC(=O)C)C)[C@@H]([C@H]([C@@H]1O)O)O	C19H32O7	372.45	High	0	0.55	Yinyanghuo	C19H32O7
XLGB-25	OC[C@H]1O[C@@H](O[C@@H]2CCC(=C(C2(C)C)CCC(=O)C)C)[C@@H]([C@H]([C@@H]1O)O)O	C19H32O7	372.45	High	0	0.55	Yinyanghuo	C19H32O7
XLGB-26	COc1ccc(cc1)C(=O)CO[C@@H]1O[C@@H](C)[C@@H]([C@H]([C@H]1O)O)O	C15H20O7	312.32	High	0	0.55	Yinyanghuo	C15H20O8
XLGB-28	OC[C@@H]1[C@H](O[C@@H]([C@H]1CO)c1cc(OC)c(c(c1)OC)O)c1cc(OC)c(c(c1)OC)O	C22H28O9	436.45	High	0	0.55	Yinyanghuo	C22H28O9
XLGB-32	COc1ccc(cc1)c1oc2c(CC=C(C)C)c(O)cc(c2c(=O)c1O)O	C21H20O6	368.38	High	0	0.55	Yinyanghuo	C21H20O6
XLGB-33	Oc1cc(O)c2c(c1)oc(cc2=O)c1ccc(c(c1)O)O	C15H10O6	286.24	High	0	0.55	Yinyanghuo	luteolin
XLGB-34	Oc1ccc(cc1)c1cc(=O)c2c(o1)cc(cc2O)O	C15H10O5	270.24	High	0	0.55	Yinyanghuo	apigenin
XLGB-35	Oc1cc(O)c2c(c1)oc(c(c2=O)O)c1ccc(c(c1)O)O	C15H10O7	302.24	High	0	0.55	Yinyanghuo	quercetin
XLGB-36	CC1=CC[C@H](CC1)C(O)(C)C	C10H18O	154.25	High	0	0.55	Yinyanghuo	(L)-alpha-Terpineol
XLGB-37	CCCCCCC/C=C/C=O	C10H18O	154.25	High	0	0.55	Yinyanghuo	dec-2-enal
XLGB-38	O=C1C[C@@H]2C([C@@]1(C)CC2)(C)C	C10H16O	152.23	High	0	0.55	Yinyanghuo	CAM
XLGB-39	C=C[C@@](CCC=C(C)C)(O)C	C10H18O	154.25	High	0	0.55	Yinyanghuo	(R)-linalool
XLGB-40	C/C=C\c1ccc2c(c1)OCO2	C10H10O2	162.19	High	0	0.55	Yinyanghuo	Izosafrol
XLGB-41	CC1=CC(=O)[C@H](CC1)C(C)C	C10H16O	152.23	High	0	0.55	Yinyanghuo	(6R)-6-isopropyl-3-methyl-1-cyclohex-2-enone
XLGB-42	C=CCc1ccc(c(c1)OC)OC	C11H14O2	178.23	High	0	0.55	Yinyanghuo	Methyleugenol
XLGB-43	O[C@H]1C[C@@H]2C([C@@]1(C)CC2)(C)C	C10H18O	154.25	High	0	0.55	Yinyanghuo	()-Borneol
XLGB-46	C/C=C/c1cc(OC)c2c(c1)[C@@H](C)[C@@H](O2)c1ccc(c(c1)OC)OC	C21H24O4	340.41	High	0	0.55	Yinyanghuo	(2R,3R)-2-(3,4-dimethoxyphenyl)-7-methoxy-3-methyl-5-[(E)-prop-1-enyl]-2,3-dihydrobenzofuran
XLGB-50	Oc1ccc(cc1)c1oc2cc(O)cc(c2c(=O)c1O)O	C15H10O6	286.24	High	0	0.55	Yinyanghuo	kaempferol
XLGB-52	Cc1cc(O)c2c(c1)C(=O)c1c(C2=O)c(O)cc(c1)O	C15H10O5	270.24	High	0	0.55	Yinyanghuo	emodin
XLGB-53	CC1=CC=CC(CC1=O)(C)C	C10H14O	150.22	High	0	0.55	Yinyanghuo	Eucarvone
XLGB-55	O=C1O[C@H]2[C@H](C1=C)CC[C@@]([C@H]1[C@@H]2[C@](C)(O)CC1)(C)O	C15H22O4	266.33	High	0	0.55	Yinyanghuo	Magnograndiolide
XLGB-56	CCCCCCO	C6H14O	102.17	High	0	0.55	Yinyanghuo	1-hexanol
XLGB-57	C[C@H]1CC[C@@]2([C@@]3([C@H]1C[C@H](C2(C)C)CC3)C)O	C15H26O	222.37	High	0	0.55	Yinyanghuo	patchouli alcohol
XLGB-58	COc1cc2C[C@@](O)(CO)[C@@H]([C@H](c2cc1O)c1ccc(c(c1)OC)O)CO	C20H24O7	376.4	High	0	0.55	Yinyanghuo	(+)-Cycloolivil
XLGB-64	CC(=O)/C=C/[C@@H]1C(=CCCC1(C)C)C	C13H20O	192.3	High	0	0.55	Yinyanghuo	24190-29-2
XLGB-66	Oc1ccc(cc1)/C=C/C(=O)c1ccc(cc1O)O	C15H12O4	256.25	High	0	0.55	Yinyanghuo	isoliquiritigenin
XLGB-67	Oc1ccc(cc1)[C@@H]1CC(=O)c2c(O1)cc(cc2)O	C15H12O4	256.25	High	0	0.55	Yinyanghuo	DFV
XLGB-68	C[C@@H]1CCC(=C(C)C)C(=O)C1	C10H16O	152.23	High	0	0.55	Yinyanghuo	Pulegone
XLGB-69	O=C1[C@@]2(C)CC[C@@H](C1(C)C)C2	C10H16O	152.23	High	0	0.55	Yinyanghuo	(1S,4R)-fenchone
XLGB-70	COc1cc(cc(c1O)OC)c1cc(=O)c2c(o1)cc(cc2O)O	C17H14O7	330.29	High	0	0.55	Yinyanghuo	tricin
XLGB-73	COc1ccc(cc1)CC=C	C10H12O	148.2	High	0	0.55	Yinyanghuo	Terragon
XLGB-76	COc1c(OC)cc(cc1OC)C	C10H14O3	182.22	High	0	0.55	Yinyanghuo	3,4,5-Trimethoxytoluene
XLGB-78	COc1ccc2c(c1O)c1c(O)c(OC)cc3c1[C@H](C2)[N](C)(C)CC3	C20H24NO4	342.41	High	0	0.55	Yinyanghuo	magnoflorine
XLGB-80	OCCc1ccc(cc1)O	C8H10O2	138.16	High	0	0.55	Yinyanghuo	Tyrosol
XLGB-82	COc1cc(ccc1O)c1cc(=O)c2c(o1)cc(cc2O)O	C16H12O6	300.26	High	0	0.55	Yinyanghuo	Chryseriol
XLGB-83	COc1ccc(cc1)c1cc(=O)c2c(o1)cc(cc2O)OC	C17H14O5	298.29	High	0	0.55	Yinyanghuo	Flavone der.
XLGB-84	O=c1ccoc(c1O)C	C6H6O3	126.11	High	0	0.55	Yinyanghuo	Vetol
XLGB-85	C/C=C\C(=O)C1=C(C)C=CCC1(C)C	C13H18O	190.28	High	0	0.55	Yinyanghuo	Damascenone
XLGB-86	CC(=CCc1c(O)cc(c2c1oc(c1ccc(cc1)O)c(c2=O)O)O)C	C20H18O6	354.35	High	0	0.55	Yinyanghuo	8-Isopentenyl-kaempferol
XLGB-87	C/C=C/c1cc(OC)c(cc1OC)OC	C12H16O3	208.25	High	0	0.55	Yinyanghuo	Azaron
XLGB-89	COc1cc(OC)cc(c1)C	C9H12O2	152.19	High	0	0.55	Yinyanghuo	3,5-Dimethoxytoluene
XLGB-90	C[C@@H]1CC[C@@H]([C@@H](C1)O)C(C)C	C10H20O	156.27	High	0	0.55	Yinyanghuo	Isomenthol
XLGB-91	CCCCCCCCOC=O	C9H18O2	158.24	High	0	0.55	Yinyanghuo	Octyl formate
XLGB-92	COc1cc(ccc1O)C[C@]1(O)CO[C@@H]([C@H]1CO)c1ccc(c(c1)OC)O	C20H24O7	376.4	High	0	0.55	Yinyanghuo	olivil
XLGB-95	Oc1ccc2c(c1)oc(c(c2=O)O)c1cc(O)c(c(c1)O)O	C15H10O7	302.24	High	0	0.55	Yinyanghuo	Robinetin
XLGB-98	COc1ccc(cc1)c1oc2c(CC=C(C)C)c(O)cc(c2c(=O)c1O)O	C21H20O6	368.38	High	0	0.55	Yinyanghuo	Anhydroicaritin
XLGB-102	COc1ccc(cc1)c1oc2c(CCC(O)(C)C)c(O)cc(c2c(=O)c1O)O	C21H22O7	386.4	High	0	0.55	Yinyanghuo	wanepimedoside_qt
XLGB-104	COc1c(O)cc(cc1O)c1cc(=O)c2c(o1)cc(c(c2)CC=C(C)C)O	C21H20O6	368.38	High	0	0.55	Yinyanghuo	wushanicariin_qt
XLGB-105	CO[C@H]1CC=C2[C@]3(C1)N(CCCc1c3cc(OC)c(c1)OC)CC2	C20H27NO3	329.43	High	0	0.55	Yinyanghuo	C-Homoerythrinan, 1,6-didehydro-3,15,16-trimethoxy-, (3.beta.)-
XLGB-106	COc1cc2C[C@@](C)(O)[C@H](C)Cc3c(c2c(c1OC)OC)c(OC)c1c(c3)OCO1	C23H28O7	416.46	High	0	0.55	Yinyanghuo	Besigomsin
XLGB-107	Oc1cc(O)c2c(c1)oc(cc2=O)c1cc(C[C@@H](C(=C)C)O)c2c(c1)C=CC(O2)(C)C	C25H24O6	420.45	High	0	0.55	Yinyanghuo	Yinyanghuo A
XLGB-108	CC(=CCc1cc(cc(c1O)C[C@H](C(=C)C)O)c1cc(=O)c2c(o1)cc(cc2O)O)C	C25H26O6	422.47	High	0	0.55	Yinyanghuo	Yinyanghuo B
XLGB-109	Oc1cc(O)c2c(c1)oc(cc2=O)c1ccc2c(c1)C=CC(O2)(C)C	C20H16O5	336.34	High	0	0.55	Yinyanghuo	Yinyanghuo C
XLGB-110	CC(=CCc1cc(ccc1O)c1cc(=O)c2c(o1)cc(cc2O)O)C	C20H18O5	338.35	High	0	0.55	Yinyanghuo	Yinyanghuo D
XLGB-111	Oc1cc(O)c2c(c1)oc(cc2=O)c1cc(O)c2c(c1)C=CC(O2)(C)C	C20H16O6	352.34	High	0	0.55	Yinyanghuo	Yinyanghuo E
XLGB-113	COc1ccc2c(c1OC)c1c(oc2=O)c(O)cc2c1C(=O)[N](CC2)(C)C	C20H20NO6	370.38	High	0	0.55	Yinyanghuo	6-hydroxy-11,12-dimethoxy-2,2-dimethyl-1,8-dioxo-2,3,4,8-tetrahydro-1H-isochromeno[3,4-h]isoquinolin-2-ium
XLGB-114	CC/C=C/CCO[C@@H]1O[C@H](CO)[C@H]([C@@H]([C@H]1O)O)O	C12H22O6	262.3	High	0	0.55	Yinyanghuo	3-Hexenyl-beta-glucopyranoside
XLGB-115	CC(=CCc1cc(ccc1O)c1cc(=O)c2c(o1)c(CC=C(C)C)c(cc2O)O)C	C25H26O5	406.47	High	0	0.55	Yinyanghuo	5,7,4'-trihydroxy8,3'-diprenylflavone
XLGB-116	CC(=CCc1cccc2c1oc(cc2=O)c1ccccc1)C	C20H18O2	290.36	High	0	0.55	Yinyanghuo	8-(3-methylbut-2-enyl)-2-phenyl-chromone
XLGB-118	COc1ccc(cc1)c1oc2c3CCC(Oc3cc(c2c(=O)c1O)O)(C)C	C21H20O6	368.38	High	0	0.55	Yinyanghuo	anhydroicaritin
XLGB-120	COc1cc(O)c2c(c1CC=C(C)C)oc(cc2=O)c1ccc(cc1)O	C21H20O5	352.38	High	0	0.55	Yinyanghuo	artonin U
XLGB-125	CC(Cc1occ(c1)[C@H]1CC=C([C@@H](C1)O)C)C	C15H22O2	234.33	High	0	0.55	Yinyanghuo	Bilobanol
XLGB-127	COc1ccc(cc1)c1oc2c(CCC(OC)(C)C)c(O)cc(c2c(=O)c1O)O	C22H24O7	400.42	High	0	0.55	Yinyanghuo	brevicornin
XLGB-131	CC(=O)CCCCCCCCCCCCC(=O)C	C16H30O2	254.41	High	0	0.55	Yinyanghuo	2,15-Hexadecanedione
XLGB-133	COc1ccc(cc1)c1oc2c(CC=C(C)C)c(O)ccc2c(=O)c1O	C21H20O5	352.38	High	0	0.55	Yinyanghuo	Epimedin C_qt
XLGB-135	O=c1cc(O)c(c(o1)C)O	C6H6O4	142.11	High	0	0.55	Yinyanghuo	epimedokoreanone A
XLGB-142	C[C@@H]1CC[C@H]2[C@@H]1[C@H]1[C@H](C1(C)C)CC[C@]2(C)O	C15H26O	222.37	High	0	0.55	Yinyanghuo	globulol
XLGB-147	OC[C@@H]1[C@H](O[C@@H]([C@H]1CO)c1cc(OC)c(c(c1)OC)O)c1cc(OC)c(c(c1)OC)O	C22H28O9	436.45	High	0	0.55	Yinyanghuo	Icaride A2
XLGB-151	COc1cc2c(cc1O)ccc1c2c(OC)c(c(c1)O)OC	C17H16O5	300.31	High	0	0.55	Yinyanghuo	3,4,6-trimethoxyphenanthrene-2,7-diol
XLGB-164	CCO[C@@H]1O[C@H](CO)[C@@H]([C@@H]([C@H]1O)O)O	C8H16O6	208.21	High	0	0.55	Dihuang	C8H16O6
XLGB-165	NCC(=O)O	C2H5NO2	75.07	High	0	0.55	Dihuang	C2H5NO2
XLGB-168	C[C@@H](C(=O)O)N	C3H7NO2	89.09	High	0	0.55	Dihuang	C3H7NO2
XLGB-171	C[C@H]([C@@H](C(=O)O)N)O	C4H9NO3	119.12	High	0	0.55	Dihuang	C4H9NO3
XLGB-174	N[C@H](C(=O)O)Cc1ccccc1	C9H11NO2	165.19	High	0	0.55	Dihuang	C9H11NO2
XLGB-176	N[C@H](C(=O)O)Cc1c[nH]cn1	C6H9N3O2	155.15	High	0	0.55	Dihuang	C6H9N3O2
XLGB-180	NC[CH][CH]C(=O)O	C4H7NO2	101.1	High	0	0.55	Dihuang	C4H7NO2
XLGB-186	NCCCC[C@@H](C(=O)O)N	C6H14N2O2	146.19	High	0	0.55	Dihuang	C6H14N2O2
XLGB-187	OC(=O)[C@H](Cc1ccc(cc1)O)N	C9H11NO3	181.19	High	0	0.55	Dihuang	C9H11NO3
XLGB-189	NC(=N)NCCC[C@@H](C(=O)O)N	C6H14N4O2	174.2	High	0	0.55	Dihuang	C6H14N4O2
XLGB-190	N[C@H](C(=O)O)C(C)C	C5H11NO2	117.15	High	0	0.55	Dihuang	C5H11NO2
XLGB-201	O[C@H]1[C@@H]2CCO[C@H]3C2[C@]([C@@H]1O)(O)CO3	C9H14O5	202.2	High	0	0.55	Dihuang	C9H14O5
XLGB-202	O[C@H]1O[C@@H]2OC[C@]3(C2[C@@H](C1)[C@H](O)[C@H]3Cl)O	C9H13ClO5	236.65	High	0	0.55	Dihuang	C9H13ClO5
XLGB-203	O[C@H]1[C@@H]2CCO[C@H]3[C@@H]2[C@]([C@@H]1Cl)(O)CO3	C9H13ClO4	220.65	High	0	0.55	Dihuang	C9H13ClO4
XLGB-213	OCc1ccc(o1)C=O	C6H6O3	126.11	High	0	0.55	Dihuang	C6H6O3
XLGB-215	OCC1=C[C@H]([C@H]2[C@]1(CO)OC(=O)C2)O	C9H12O5	200.19	High	0	0.55	Dihuang	C9H12O5
XLGB-216	OC[C@H]1O[C@@H](O[C@]2(C)CCCC([C@]2(O)/C=C/C(=O)C)(C)C)[C@@H]([C@H]([C@@H]1O)O)O	C19H32O8	388.45	High	0	0.55	Dihuang	C19H32O8
XLGB-217	CO[C@H]1O[C@@H](OC)C[C@@H]2[C@H]1[C@@](C)(O)C[C@H]2O	C11H20O5	232.27	High	0	0.55	Dihuang	C11H20O5
XLGB-218	O=c1cc[nH]c(=O)[nH]1	C4H4N2O2	112.09	High	0	0.55	Dihuang	C4H4N2O2
XLGB-221	O=C1N(Cc2ccccc2)C(=O)C2C(N1Cc1ccccc1)C2(Br)Br	C19H16Br2N2O2	464.15	High	0	0.55	Dihuang	C19H16Br2N2O2
XLGB-222	CO[C@H]1O[C@@H]2OC[C@]3(C2[C@@H](C1)[C@H](O)[C@H]3Cl)O	C10H15ClO5	250.68	High	0	0.55	Dihuang	C10H15ClO5
XLGB-223	CO[C@@H]1O[C@@H]2OC[C@]3(C2[C@@H](C1)[C@H](O)[C@H]3Cl)O	C10H15ClO5	250.68	High	0	0.55	Dihuang	C10H15ClO5
XLGB-224	CO[C@H]1O[C@@H]2OC[C@]3(C2[C@@H](C1)[C@H](O)[C@H]3O)O	C10H16O6	232.23	High	0	0.55	Dihuang	C10H16O6
XLGB-230	Cc1cc(O)c2c(c1)C(=O)c1c(C2=O)cccc1O	C15H10O4	254.24	High	0	0.55	Danshen	C14H12O5
XLGB-231	O=Cc1ccc(c(c1)O)O	C7H6O3	138.12	High	0	0.55	Danshen	C6H6N2O
XLGB-235	OCC1(O)CCCc2c1ccc1c2C(=O)C(=O)c2c1occ2C	C18H16O5	312.32	High	0	0.55	Danshen	C20H16O7
XLGB-236	Cc1cccc2c1ccc1c2c(=O)oc2c1occ2C	C17H12O3	264.28	High	0	0.55	Danshen	C12H8O4
XLGB-239	C[C@@H]1CO[C@@]2(C1)OC(=O)c1c2ccc2c1CCCC2(C)C	C18H22O3	286.37	High	0	0.55	Danshen	C20H20O4
XLGB-240	Cc1coc2c1C(=O)C(=O)c1c2ccc2c1cccc2C	C18H12O3	276.29	High	0	0.55	Danshen	C13H14O4
XLGB-241	O=C1c2c3CCCC(c3ccc2c2c(C1=O)c(C)co2)(C)C	C19H18O3	294.34	High	0	0.55	Danshen	C20H16O5
XLGB-242	OC[C@@]1(C)CCCc2c1ccc1c2C(=O)C(=O)c2c1occ2C	C19H18O4	310.34	High	0	0.55	Danshen	C17H14O5
XLGB-245	O=C1CCC(c2c1c1c(cc2)cc(c(c1O)O)C(C)C)(C)C	C19H22O3	298.38	High	0	0.55	Danshen	C20H20O4
XLGB-246	CC(C1=Cc2ccc3c(c2C(=O)C1=O)CCCC3(C)C)C	C19H22O2	282.38	High	0	0.55	Danshen	C21H22O4
XLGB-247	O=CC1(C)CCCc2c1ccc1c2C(=O)C(=O)c2c1occ2C	C19H16O4	308.33	High	0	0.55	Danshen	C20H16O4
XLGB-248	O=C1c2c3CCCC(=O)c3ccc2c2c(C1=O)c(C)co2	C17H12O4	280.27	High	0	0.55	Danshen	C20H18O5
XLGB-250	CC(C1=Cc2ccc3c(c2C(=O)C1=O)CCCC3=C)C	C18H18O2	266.33	High	0	0.55	Danshen	C16H10O5
XLGB-251	O=C1c2c3CCCC(=C)c3ccc2c2c(C1=O)c(C)co2	C18H14O3	278.3	High	0	0.55	Danshen	C11H6O3
XLGB-253	Cc1coc2c1C(=O)c1c(C2=O)c2cccc(c2cc1)C	C18H12O3	276.29	High	0	0.55	Danshen	C13H14O4
XLGB-255	CC(=CCOc1c2ccoc2cc2c1ccc(=O)o2)C	C16H14O4	270.28	High	0	0.55	Danshen	C20H16O5
XLGB-259	O=C1C[C@H]2C(C)(C)CCC[C@@]2(c2c1cc(C(C)C)c(c2)O)C	C20H28O2	300.44	High	0	0.55	Danshen	C11H6O3
XLGB-263	O[C@@H]1CCc2c(C1(C)C)ccc1c2C(=O)C(=O)c2c1occ2C	C19H18O4	310.34	High	0	0.55	Danshen	C20H18O4
XLGB-264	O[C@H]1C[C@H]2C(C)(C)CCC[C@@]2(C2=C1C=C(C(C)C)C(=O)C2=O)C	C20H28O3	316.43	High	0	0.55	Danshen	C17H14O5
XLGB-267	O=c1c(O)cc2c(cc1C)ccc1c2CCCC1(C)C	C18H20O2	268.35	High	0	0.55	Danshen	C20H20O6
XLGB-268	CC(=O)c1cc2ccc3c(c2cc1O)CCCC3(C)C	C18H20O2	268.35	High	0	0.55	Danshen	C18H20O2
XLGB-270	O=Cc1cccc2c1ccc1c2C(=O)C(=O)c2c1occ2C	C18H10O4	290.27	High	0	0.55	Danshen	C18H10O4
XLGB-271	O[C@H]1CCc2c([C@@]1(C)O)ccc1c2C(=O)C(=O)c2c1occ2C	C18H16O5	312.32	High	0	0.55	Danshen	C18H16O5
XLGB-272	O[C@H]1CCc2c([C@@]1(C)O)ccc1c2C(=O)C(=O)c2c1occ2C	C18H16O5	312.32	High	0	0.55	Danshen	C18H16O5
XLGB-274	O=C1C(=O)c2c(C)coc2c2c1ccc1c2cccc1C	C18H12O3	276.29	High	0	0.55	Danshen	C19H18O3
XLGB-275	OCC1(C)CCCc2c1ccc1c2C(=O)c2c(C1=O)c(co2)C	C19H18O4	310.34	High	0	0.55	Danshen	C19H18O4
XLGB-276	C[C@H]1CO[C@@]2(C1)OC(=O)c1c2ccc2c1cccc2C	C17H16O3	268.31	High	0	0.55	Danshen	C17H16O3
XLGB-277	Oc1cc(O)c2=CC(=C([O]=c2c1)c1ccc(c(c1)O)O)O	C15H11O6	287.24	High	0	0.55	Danshen	cyanidol
XLGB-282	OC(=O)[C@@H]1CCCN1	C5H9NO2	115.13	High	0	0.55	Danshen	Prolinum
XLGB-284	CC[C@@H]([C@@H](C(=O)O)N)C	C6H13NO2	131.17	High	0	0.55	Danshen	L-Ile
XLGB-288	C/C(=C\COC(=O)C)/CCC=C(C)C	C12H20O2	196.29	High	0	0.55	Danshen	NERYLACETATE
XLGB-295	COc1cc(O)c2c(c1)C(=O)c1c(C2=O)c(O)cc(c1)C	C16H12O5	284.26	High	0	0.55	Danshen	Physcion
XLGB-304	CC1=CC[C@@](CC1)(O)C(C)C	C10H18O	154.25	High	0	0.55	Danshen	(R)-p-Menth-1-en-4-ol
XLGB-306	CC1=C[C@@H]2[C@@H](CC1)[C@](C)(O)CC[C@H]2C(C)C	C15H26O	222.37	High	0	0.55	Danshen	(1R,4S,4aR,8aR)-4-isopropyl-1,6-dimethyl-3,4,4a,7,8,8a-hexahydro-2H-naphthalen-1-ol
XLGB-308	C=C[C@](OC(=O)C)(CCC=C(C)C)C	C12H20O2	196.29	High	0	0.55	Danshen	[(3R)-3,7-dimethylocta-1,6-dien-3-yl] acetate
XLGB-314	CC(=CCOc1c2ccoc2cc2c1ccc(=O)o2)C	C16H14O4	270.28	High	0	0.55	Danshen	isoimperatorin
XLGB-318	C=C1CC[C@@H]2[C@H]([C@H]3[C@H]1CC[C@]3(C)O)C2(C)C	C15H24O	220.35	High	0	0.55	Danshen	1H-Cycloprop(e)azulen-7-ol, decahydro-1,1,7-trimethyl-4-methylene-, (1aR-(1aalpha,4aalpha,7beta,7abeta,7balpha))-
XLGB-319	O=C1C[C@H]2C(C)(C)CCC[C@]2(c2c1cc(C(C)C)c(c2)O)C	C20H28O2	300.44	High	0	0.55	Danshen	sugiol
XLGB-322	O=C1c2c3C=CCC(c3ccc2c2c(C1=O)c(C)co2)(C)C	C19H16O3	292.33	High	0	0.55	Danshen	Dehydrotanshinone II A
XLGB-326	O[C@@H]1C[C@H]2C([C@]1(C)CC2)(C)C	C10H18O	154.25	High	0	0.55	Danshen	[(1S)-endo]-(-)-Borneol
XLGB-328	OC[C@@H](C(=O)O)N	C3H7NO3	105.09	High	0	0.55	Danshen	L-Serin
XLGB-329	C[C@H]([C@@H](C(=O)O)N)O	C4H9NO3	119.12	High	0	0.55	Danshen	Threonin
XLGB-335	C[C@@H]1CC[C@@H]2[C@@]31CC[C@]([C@H](C3)C2(C)C)(C)O	C15H26O	222.37	High	0	0.55	Danshen	(-)-Epicedrol
XLGB-336	N[C@H](C(=O)O)CC(C)C	C6H13NO2	131.17	High	0	0.55	Danshen	Leucinum
XLGB-337	CSCC[C@@H](C(=O)O)N	C5H11NO2S	149.21	High	0	0.55	Danshen	h-Met-h
XLGB-340	Cc1cc(O)c2c(c1)C(=O)c1c(C2=O)cccc1O	C15H10O4	254.24	High	0	0.55	Danshen	1,5-Dihydroxy-3-methylanthraquinone
XLGB-343	O=C1CCC(c2c1c1c(cc2)cc(c(c1O)O)C(C)C)(C)C	C19H22O3	298.38	High	0	0.55	Danshen	5,6-dihydroxy-7-isopropyl-1,1-dimethyl-2,3-dihydrophenanthren-4-one
XLGB-344	O=C1c2c3CCC=C(c3ccc2c2c(C1=O)c(C)co2)C	C18H14O3	278.3	High	0	0.55	Danshen	1,2-DT-Quinone
XLGB-345	CC(C1=Cc2ccc3c(c2C(=O)C1=O)C=CCC3(C)C)C	C19H20O2	280.36	High	0	0.55	Danshen	Dehydromiltirone
XLGB-348	CC(C1=Cc2ccc3c(c2C(=O)C1=O)cccc3C)C	C18H16O2	264.32	High	0	0.55	Danshen	2-isopropyl-8-methylphenanthrene-3,4-dione
XLGB-350	OCC(=O)c1ccc(c(c1)O)O	C8H8O4	168.15	High	0	0.55	Danshen	1-(3,4-dihydroxyphenyl)-2-hydroxyethanone
XLGB-351	O=C[C@H](/C=C(/CCC=C(C)C)\C)O	C11H18O2	182.26	High	0	0.55	Danshen	3,7-dimethylocta-2,6-dien-1-yl formate
XLGB-352	O=C1c2c3[C@H](O)CCC(c3ccc2c2c(C1=O)c(C)co2)(C)C	C19H18O4	310.34	High	0	0.55	Danshen	3α-hydroxytanshinoneⅡa
XLGB-353	O[C@H]1CCc2c(C1(C)C)ccc1c2C(=O)C(=O)c2c1occ2C	C19H18O4	310.34	High	0	0.55	Danshen	3beta-Hydroxytanshinone IIA
XLGB-354	CC([C@@]12CC[C@@]([C@H]2C1)(C)O)C	C10H18O	154.25	High	0	0.55	Danshen	(1R,4R,5S)-1-isopropyl-4-methyl-4-bicyclo[3.1.0]hexanol
XLGB-356	CC(C1=Cc2ccc3c(c2C(=O)C1=O)CCCC3=C)C	C18H18O2	266.33	High	0	0.55	Danshen	4-methylenemiltirone
XLGB-357	OCCCc1cc(OC)c2c(c1)c(C=O)c(o2)c1ccc(c(c1)OC)O	C20H20O6	356.37	High	0	0.55	Danshen	2-(4-hydroxy-3-methoxyphenyl)-5-(3-hydroxypropyl)-7-methoxy-3-benzofurancarboxaldehyde
XLGB-361	O[C@H]1C[C@H]2C(C)(C)CCC[C@@]2(C2=C1C=C(C(C)C)C(=O)C2=O)C	C20H28O3	316.43	High	0	0.55	Danshen	(4bS,8aS,10S)-10-hydroxy-2-isopropyl-4b,8,8-trimethyl-5,6,7,8a,9,10-hexahydrophenanthrene-3,4-dione
XLGB-363	C=C1CC[C@@H]2O[C@@]2(CC[C@@H]2[C@H]1CC2(C)C)C	C15H24O	220.35	High	0	0.55	Danshen	TNP00297
XLGB-364	O=Cc1cccc2c1ccc1c2C(=O)C(=O)c2c1occ2C	C18H10O4	290.27	High	0	0.55	Danshen	formyltanshinone
XLGB-365	O[C@H]1CCc2c(C1=C)ccc1c2C(=O)C(=O)c2c1occ2C	C18H14O4	294.3	High	0	0.55	Danshen	3-beta-Hydroxymethyllenetanshiquinone
XLGB-367	O=C1c2c3CCCC(=C)c3ccc2c2c(C1=O)c(C)co2	C18H14O3	278.3	High	0	0.55	Danshen	Methylenetanshinquinone
XLGB-369	O=C1[C@@H]2OC(=O)[C@]3([C@@H]1C(C)(C)CCC3)c1c2cc(C(C)C)c(c(c1=O)C(=O)C)O	C23H26O6	398.45	High	0	0.55	Danshen	przewalskin a
XLGB-370	CC(C1=C[C@]23[C@](C1=O)(O)C(=O)O[C@@H]3C1=CCCC([C@H]1CC2)(C)C)C	C20H26O4	330.42	High	0	0.55	Danshen	przewalskin b
XLGB-371	CO[C@@H]1C[C@@H]2C(=CCCC2(C)C)Cc2c1cc(C(C)C)c(c2O)O	C21H30O3	330.46	High	0	0.55	Danshen	przewalskin c
XLGB-372	CC(c1cc2CC[C@H]3C(=Cc2c(c1O)O)C=CCC3(C)C)C	C20H26O2	298.42	High	0	0.55	Danshen	przewalskin d
XLGB-373	OCc1coc2c1C(=O)C(=O)c1c2ccc2c1CCCC2(C)C	C19H18O4	310.34	High	0	0.55	Danshen	Przewaquinone A
XLGB-374	OCc1coc2c1C(=O)C(=O)c1c2ccc2c1cccc2C	C18H12O4	292.29	High	0	0.55	Danshen	Przewaquinone B
XLGB-375	O=C1c2c3CCC[C@@](c3ccc2c2c(C1=O)c(C)co2)(C)O	C18H16O4	296.32	High	0	0.55	Danshen	przewaquinone c
XLGB-376	O[C@@H]1CCc2c([C@]1(C)O)ccc1c2C(=O)C(=O)c2c1occ2C	C18H16O5	312.32	High	0	0.55	Danshen	(6S,7R)-6,7-dihydroxy-1,6-dimethyl-8,9-dihydro-7H-naphtho[8,7-g]benzofuran-10,11-dione
XLGB-377	OC[C@@H]1[C@H](O)CCc2c1ccc1c2C(=O)C(=O)c2c1occ2C	C18H16O5	312.32	High	0	0.55	Danshen	przewaquinone f
XLGB-379	CC([C@@H]1[C@H]2OCC(c3c2c2c(C1=O)ccc(c2cc3)C)(C)C)C	C21H24O2	308.41	High	0	0.55	Danshen	saloilenone
XLGB-382	CC(=CCCc1c(C)ccc2c1C(=O)C(=O)C(=C2)C(C)C)C	C20H24O2	296.4	High	0	0.55	Danshen	Saprothoquinone
XLGB-383	C=C[C@@](CC[C@@H]1[C@](C)(O)CC[C@@H]2[C@]1(C)CCCC2(C)C)(O)C	C20H36O2	308.5	High	0	0.55	Danshen	sclareol
XLGB-384	O=C[C@@]1(C)CCCc2c1ccc1c2C(=O)C(=O)c2c1occ2C	C19H16O4	308.33	High	0	0.55	Danshen	tanshinaldehyde
XLGB-385	OCc1cccc2c1ccc1c2C(=O)C(=O)c2c1occ2C	C18H12O4	292.29	High	0	0.55	Danshen	Tanshinol A
XLGB-389	CC(=C)CCCc1c(C)ccc2c1C(=O)C(=O)C(=C2)C(C)C	C20H24O2	296.4	High	0	0.55	Danshen	Aethiopinone
XLGB-391	O=C1O[C@H]2C[C@H]3[C@]1(CCCC3(C)C)c1c2cc(c(c1O)O)C(C)C	C20H26O4	330.42	High	0	0.55	Danshen	carnosol
XLGB-398	C[C@H]1CO[C@]2(C1)OCC(=O)c1c2ccc2c1cccc2C	C18H18O3	282.33	High	0	0.55	Danshen	danshenspiroketallactone
XLGB-403	C[C@H]1COc2c1oc(=O)c1c2ccc2c1cccc2C	C17H14O3	266.29	High	0	0.55	Danshen	dihydrotanshinlactone
XLGB-408	C[C@H]1CO[C@]2(C1)OCC(=O)[C@H]1[C@H]2C=Cc2c1cccc2C	C18H20O3	284.35	High	0	0.55	Danshen	epidanshenspiroketallactone
XLGB-413	OC[C@@]1(C)CCCc2c1ccc1c2C(=O)c2c(C1=O)c(co2)C	C19H18O4	310.34	High	0	0.55	Danshen	isotanshinone iib
XLGB-414	O=C1c2c3CCCC(c3ccc2C(=O)c2c1occ2C)(C)C	C19H18O3	294.34	High	0	0.55	Danshen	Isotanshinone II
XLGB-415	Cc1coc2c1C(=O)c1c(C2=O)c2cccc(c2cc1)C	C18H12O3	276.29	High	0	0.55	Danshen	Isotanshinone I
XLGB-418	COC(=O)[C@@H](Cc1ccc(c(c1)O)O)OC(=O)/C=C\c1ccc(c(c1)O)O	C19H18O8	374.34	High	0	0.55	Danshen	methylrosmarinate
XLGB-419	COC(=O)[C@@]1(C)CCCc2c1ccc1c2C(=O)C(=O)c2c1occ2C	C20H18O5	338.35	High	0	0.55	Danshen	methyltanshinonate
XLGB-420	CC(C1=Cc2ccc(c3c2[C@@](C1=O)(O)C(C)(C)CCC3)C)C	C20H26O2	298.42	High	0	0.55	Danshen	microstegiol
XLGB-423	O=c1cc2c(cc(c1O)C)[C@H]1OC[C@]32CCCC([C@@H]3C1)(C)C	C19H24O3	300.39	High	0	0.55	Danshen	miltipolone
XLGB-424	CC(C1=Cc2ccc3c(c2C(=O)C1=O)CCCC3(C)C)C	C19H22O2	282.38	High	0	0.55	Danshen	Miltirone
XLGB-428	Cc1cc2[C@H]3OC[C@@]4(c2cc1O)[C@@H](C3)C(C)(C)CCC4	C18H24O2	272.38	High	0	0.55	Danshen	przewalskin
XLGB-429	O=C1c2c3CCCC(=O)c3ccc2c2c(C1=O)c(C)co2	C17H12O4	280.27	High	0	0.55	Danshen	1-methyl-8,9-dihydro-7H-naphtho[5,6-g]benzofuran-6,10,11-trione
XLGB-435	O=C1OC[C@@]23[C@H]1C=CC[C@]3(O)[C@@]1(C(=CC2)C(=O)O[C@H](C1)c1cocc1)C	C20H20O6	356.37	High	0	0.55	Danshen	salviacoccin
XLGB-445	CC(=O)C1=C[C@@H]2C=CC3=C([C@H]2C=C1O)CCCC3(C)C	C18H22O2	270.37	High	0	0.55	Danshen	salvilenone Ⅰ
XLGB-446	O[C@@H]1CC(C)(C)[C@@H]2[C@](C1)(C)c1cc(O)c(cc1CC2)C(C)C	C20H30O2	302.45	High	0	0.55	Danshen	salviol
XLGB-450	O=C1C[C@H]2C(C)(C)CCC[C@@]2(c2c1cc(C(C)C)c(c2)O)C	C20H28O2	300.44	High	0	0.55	Danshen	NSC 122421
XLGB-451	OC[C@]1(O)CCCc2c1ccc1c2C(=O)C(=O)c2c1occ2C	C18H16O5	312.32	High	0	0.55	Danshen	(6S)-6-hydroxy-1-methyl-6-methylol-8,9-dihydro-7H-naphtho[8,7-g]benzofuran-10,11-quinone
XLGB-452	O[C@H]1CCc2c([C@@]1(C)O)ccc1c2C(=O)C(=O)c2c1occ2C	C18H16O5	312.32	High	0	0.55	Danshen	Tanshindiol B
XLGB-453	O[C@@H]1CCc2c([C@@]1(C)O)ccc1c2C(=O)C(=O)c2c1occ2C	C18H16O5	312.32	High	0	0.55	Danshen	Przewaquinone E
XLGB-454	Cc1cccc2c1ccc1c2c(=O)oc2c1occ2C	C17H12O3	264.28	High	0	0.55	Danshen	Tanshilactone
XLGB-455	O=C1c2c3CCCC(c3ccc2c2c(C1=O)c(C)co2)(C)C	C19H18O3	294.34	High	0	0.55	Danshen	tanshinone iia
XLGB-456	OC[C@@]1(C)CCCc2c1ccc1c2C(=O)C(=O)c2c1occ2C	C19H18O4	310.34	High	0	0.55	Danshen	(6S)-6-(hydroxymethyl)-1,6-dimethyl-8,9-dihydro-7H-naphtho[8,7-g]benzofuran-10,11-dione
XLGB-458	Cc1coc2c1C(=O)C(=O)c1c2ccc2c1cccc2C	C18H12O3	276.29	High	0	0.55	Danshen	tanshinone i
XLGB-461	C=C1CC[C@H]2[C@@H](C1)[C@H](CC[C@]2(C)O)C(C)C	C15H26O	222.37	High	0	0.55	Danshen	β-cadinol
XLGB-463	Cc1cccc(c1)O	C7H8O	108.14	High	0	0.55	Xuduan	C7H8O
XLGB-464	Cc1ccc(cc1)O	C7H8O	108.14	High	0	0.55	Xuduan	C7H8O
XLGB-471	CC(C1CC=C(C(=O)C1)C)C	C10H16O	152.23	High	0	0.55	Xuduan	C10H16O
XLGB-473	Oc1ccc(c(c1C)Br)C	C8H9BrO	201.06	High	0	0.55	Xuduan	C8H9BrO
XLGB-474	CCc1cc(C)ccc1O	C9H12O	136.19	High	0	0.55	Xuduan	C9H12O
XLGB-475	CCC1(O)C(=O)OCc2c1cc1c3nc4ccccc4cc3Cn1c2=O	C20H16N2O4	348.35	High	0	0.55	Xuduan	C20H16N2O4
XLGB-476	C=Cc1cncc2c1CCOC2=O	C10H9NO2	175.18	High	0	0.55	Xuduan	C10H9NO2
XLGB-486	O[C@@H]1Cc2c([C@H]1C)cncc2	C9H11NO	149.19	High	0	0.55	Xuduan	Venoterpine
XLGB-496	COc1cc(O)c2c(c1)oc1c(c2=O)cc(cc1)O	C14H10O5	258.23	High	0	0.55	Xuduan	Gentisin
XLGB-498	COc1c(c2ccccc2)n(C)c2c(c1=O)cc(cc2)OC	C18H17NO3	295.33	High	0	0.55	Xuduan	Japonine
XLGB-500	Cc1cc(C)c(c(c1)C)O	C9H12O	136.19	High	0	0.55	Xuduan	Mesitol
XLGB-501	COC(=O)c1cncc2c1C[C@@H]([C@@H]2C)O	C11H13NO3	207.23	High	0	0.55	Xuduan	Cantleyine
XLGB-502	ClC[C@@H](O[C@H](CCl)Cl)Cl	C4H6Cl4O	211.9	High	0	0.55	Xuduan	Cantleyoside
XLGB-509	O=CC[C@H]1[C@@H](CC)[C@@H](O)CC=C1C(=O)O[C@@H]1C[C@@H]2[C@]([C@H]1C)(C)[C@H](O)OC=C2	C21H30O6	378.46	High	0	0.55	Xuduan	Sylvestroside III_qt
XLGB-510	COc1cc(O)c(c(c1)O)C(=O)c1ccc(cc1)O	C14H12O5	260.24	High	0	0.55	Zhimu	C14H12O5
XLGB-516	NC(=O)c1cccnc1	C6H6N2O	122.12	High	0	0.55	Zhimu	C6H6N2O
XLGB-521	Oc1ccc2c(c1)oc1c2c(=O)oc2c1cc1c(c2)OC(C(C1O)O)(C)C	C20H16O7	368.34	High	0	0.55	Buguzhi	C20H16O7
XLGB-522	COc1c2oc(=O)ccc2cc2c1occ2	C12H8O4	216.19	High	0	0.55	Buguzhi	C12H8O4
XLGB-524	CC(=CCc1c(O)ccc2c1OC(CC2=O)c1ccc(cc1)O)C	C20H20O4	324.37	High	0	0.55	Buguzhi	C20H20O4
XLGB-525	CCOC(=O)CCc1ccc2c(c1O)cco2	C13H14O4	234.25	High	0	0.55	Buguzhi	C13H14O4
XLGB-526	Oc1ccc2c(c1)oc1c2c(=O)oc2c1cc1CCC(Oc1c2)(C)C	C20H16O5	336.34	High	0	0.55	Buguzhi	C20H16O5
XLGB-527	COc1cc(O)c(cc1C(=O)C=Cc1ccc(cc1)O)C=O	C17H14O5	298.29	High	0	0.55	Buguzhi	C17H14O5
XLGB-528	CC(=CCc1cc2C(=O)CC(Oc2cc1O)c1ccc(cc1)O)C	C20H20O4	324.37	High	0	0.55	Buguzhi	C20H20O4
XLGB-529	COc1cc2O[C@H](CC(=O)c2cc1CC=C(C)C)c1ccc(cc1)O	C21H22O4	338.4	High	0	0.55	Buguzhi	C21H22O4
XLGB-530	Oc1ccc2c(c1)occ(c2=O)c1ccc2c(c1)C=CC(O2)(C)C	C20H16O4	320.34	High	0	0.55	Buguzhi	C20H16O4
XLGB-531	Oc1ccc2c(c1)occ(c2=O)c1ccc2c(c1)CC(C(O2)(C)C)O	C20H18O5	338.35	High	0	0.55	Buguzhi	C20H18O5
XLGB-532	O=Cc1cc(ccc1O)c1coc2c(c1=O)ccc(c2)O	C16H10O5	282.25	High	0	0.55	Buguzhi	C16H10O5
XLGB-533	O=c1ccc2c(o1)c1ccoc1cc2	C11H6O3	186.16	High	0	0.55	Buguzhi	C11H6O3
XLGB-534	CCOC(=O)CCc1cc2ccoc2cc1O	C13H14O4	234.25	High	0	0.55	Buguzhi	C13H14O4
XLGB-535	CC(=CCc1cc2c(cc1O)oc(=O)c1c2oc2c1ccc(c2)O)C	C20H16O5	336.34	High	0	0.55	Buguzhi	C20H16O5
XLGB-536	O=c1ccc2c(o1)cc1c(c2)cco1	C11H6O3	186.16	High	0	0.55	Buguzhi	C11H6O3
XLGB-538	CC(=CCc1cc(ccc1O)c1coc2c(c1=O)ccc(c2)O)C	C20H18O4	322.35	High	0	0.55	Buguzhi	C20H18O4
XLGB-539	O=Cc1cc(C(=O)C=Cc2ccc(cc2)O)c(cc1OC)O	C17H14O5	298.29	High	0	0.55	Buguzhi	C17H14O5
XLGB-540	O=C1C=C2CC(C3=CCOC3=C2C2=C3C(=COC12)C(CO3)O)C(O)(C)C	C20H20O6	356.37	High	0	0.55	Buguzhi	C20H20O6
XLGB-001	OCC1OC(OCC2OC(OC(=O)C3CC(C)(C)CC4C3CCC3(C4=CCC4C3(C)CCC3C4(C)CCC(C3(C)CO)OC3OCC(C(C3O)O)O)C)C(C(C2O)O)O)C(C(C1O)O)O	C47H76O18	929.1	Low	3	0.17
XLGB-002	O=c1ccc2c(o1)cc1c(c2)cco1	C11H6O3	186.16	High	0	0.55
XLGB-003	O=c1ccc2c(o1)c1ccoc1cc2	C11H6O3	186.16	High	0	0.55		Angelicin
XLGB-004	COc1ccc(cc1)c1oc2c(CC=C(C)C)c(OC3OC(CO)C(C(C3O)O)O)cc(c2c(=O)c1OC1OC(C)C(C(C1OC1OC(C)C(C(C1O)O)O)O)O)O	C39H50O19	822.8	Low	3	0.17
XLGB-005	COc1ccc(cc1)c1oc2c(CC=C(C)C)c(OC3OC(CO)C(C(C3O)O)O)cc(c2c(=O)c1OC1OC(C)C(C(C1OC1OCC(C(C1O)O)O)O)O)O	C38H48O19	808.78	Low	3	0.17
XLGB-006	COc1ccc(cc1)c1oc2c(CC=C(C)C)c(OC3OC(CO)C(C(C3O)O)O)cc(c2c(=O)c1OC1OC(C)C(C(C1O)O)O)O	C33H40O15	676.66	Low	3	0.17
EXD-2	O=C/C=C(\CCC=C(C)C)/C	C10H16O	152.23	High	0	0.55	Xianmao	Neral
EXD-5	COc1cc(cc(c1O)OC)[C@H]1OC[C@H]2[C@@H]1CO[C@@H]2c1cc(OC)c(c(c1)OC)O	C22H26O8	418.44	High	0	0.55	Xianmao	(+)-Syringaresinol
EXD-8	O=CCc1ccccc1	C8H8O	120.15	High	0	0.55	Xianmao	Hyacinthin
EXD-9	COc1cccc(c1)OC	C8H10O2	138.16	High	0	0.55	Xianmao	3-Methoxyanisole
EXD-18	Cc1nc(C)c(nc1C)C	C8H12N2	136.19	High	0	0.55	Xianmao	tetramethylpyrazine
EXD-19	COc1c(OC)cc(cc1OC)C	C10H14O3	182.22	High	0	0.55	Xianmao	3,4,5-Trimethoxytoluene
EXD-21	Cn1cnc2c1c(=O)n(C)c(=O)n2C	C8H10N4O2	194.19	High	0	0.55	Xianmao	caffeine
EXD-22	CCC(=O)/C=C/CC=C(C)C	C10H16O	152.23	High	0	0.55	Xianmao	(E)-6-Methyl-3,5-heptadien-2-one
EXD-23	COc1ccc(cc1O)/C=C/C(=O)c1c(O)cc(c(c1O)OC)O	C17H16O7	332.3	High	0	0.55	Xianmao	3,2',4',6'-Tetrahydroxy-4,3'-dimethoxy chalcone
EXD-28	Cc1ccc(o1)C=O	C6H6O2	110.11	High	0	0.55	Xianmao	5-METHYLFURFURAL
EXD-30	COc1c(Cl)c(C)c(c(c1Cl)O)Cl	C8H7Cl3O2	241.5	High	0	0.55	Xianmao	2,4,6-Trichloro-3-methoxy-5-methylphenol
EXD-34	COc1cccc(c1C(=O)OCc1cc(O)ccc1O)O	C15H14O6	290.27	High	0	0.55	Xianmao	Curculigoside B_qt
EXD-36	CC(C1=CC[C@]([C@H]2[C@@H](C1)[C@@](C)(O)CC2)(C)O)C	C15H26O2	238.37	High	0	0.55	Xianmao	Curcumadiol
EXD-38	COc1cccc(c1C(=O)OCc1cc(O)ccc1O)OC	C16H16O6	304.29	High	0	0.55	Xianmao	Curculigoside_qt
EXD-39	CN(C(=O)CCC(=O)N(C)C)C	C8H16N2O2	172.22	High	0	0.55	Xianmao	TETRAMETHYLSUCCINAMIDE
EXD-40	COC(=O)N(C(=O)C)O	C4H7NO4	133.1	High	0	0.55	Xianmao	N-acetyl-N-hydroxy-2-carbamic acid methylester
EXD-41	COc1ccc2c(c1Br)cccc2	C11H9BrO	237.09	High	0	0.55	Xianmao	1-Bromo-2-methoxynaphthalene
EXD-42	OC[C@H]1O[C@@H](Oc2cc(C)cc(c2)O)[C@@H]([C@H]([C@@H]1O)O)O	C13H18O7	286.28	High	0	0.55	Xianmao	orcinol glucoside
EXD-43	Cc1cc(O)cc(c1)O	C7H8O2	124.14	High	0	0.55	Xianmao	Orcin
EXD-44	COc1ccc2c(c1)c(=O)c1c(o2)c(OC)c(c(c1)OC)OC	C17H16O6	316.31	High	0	0.55	Xianmao	2,3,4,7-tetramethoxyxanthone
EXD-45	O[C@@H]1C=C2CCN3[C@@H]2[C@@H]([C@H]1O)c1cc2OCOc2cc1C3	C16H17NO4	287.31	High	0	0.55	Xianmao	lycorine
EXD-46	C[C@H]1CC[C@]2(OC1)O[C@@H]1[C@H]([C@@H]2C)[C@]2([C@H](C1)[C@@H]1CC=C3[C@@]([C@H]1CC2)(C)C[C@@H]([C@H](C3)O)O)C	C27H42O4	430.62	High	0	0.55	Xianmao	yuccagenin
EXD-49	COc1cc(O)c(c(c1Cl)C)Cl	C8H8Cl2O2	207.05	High	0	0.55	Xianmao	2,4-dichloro-5-methoxy-3-methylphenol
EXD-74	COc1ccc(c(c1C(=O)OCc1cc(O)ccc1O)OC)O	C16H16O7	320.29	High	0	0.55	Xianmao	Curculigoside C_qt
EXD-77	CCCCC[C@H](CCC)CO	C10H22O	158.28	High	0	0.55	Xianmao	2-PROPYL-1-HEPTANOL
EXD-78	O=C1C=C(C(=O)C(=C1)C(C)(C)C)C(C)(C)C	C14H20O2	220.31	High	0	0.55	Xianmao	DBQ
EXD-83	C[C@@H]1CC[C@@]2(OC1)O[C@@H]1[C@H]([C@@H]2C)[C@@]2([C@@H](C1)[C@@H]1CC=C3[C@]([C@H]1CC2)(C)C[C@H]([C@@H](C3)O)O)C	C27H42O4	430.62	High	0	0.55	Xianmao	C27H42O4
EXD-84	OC[C@H]1O[C@@H](Oc2cc(C)cc(c2)O)[C@@H]([C@H]([C@@H]1O)O)O	C13H18O7	286.28	High	0	0.55	Xianmao	C13H18O7
EXD-93	Oc1cc(O)c2c(c1)oc(cc2=O)c1ccc(c(c1)O)O	C15H10O6	286.24	High	0	0.55	Yinyanghuo	luteolin
EXD-94	Oc1ccc(cc1)c1cc(=O)c2c(o1)cc(cc2O)O	C15H10O5	270.24	High	0	0.55	Yinyanghuo	apigenin
EXD-95	Oc1cc(O)c2c(c1)oc(c(c2=O)O)c1ccc(c(c1)O)O	C15H10O7	302.24	High	0	0.55	Yinyanghuo	quercetin
EXD-96	CC1=CC[C@H](CC1)C(O)(C)C	C10H18O	154.25	High	0	0.55	Yinyanghuo	(L)-alpha-Terpineol
EXD-97	CCCCCCC/C=C/C=O	C10H18O	154.25	High	0	0.55	Yinyanghuo	dec-2-enal
EXD-98	O=C1C[C@@H]2C([C@@]1(C)CC2)(C)C	C10H16O	152.23	High	0	0.55	Yinyanghuo	CAM
EXD-99	C=C[C@@](CCC=C(C)C)(O)C	C10H18O	154.25	High	0	0.55	Yinyanghuo	(R)-linalool
EXD-100	C/C=C\c1ccc2c(c1)OCO2	C10H10O2	162.19	High	0	0.55	Yinyanghuo	Izosafrol
EXD-101	CC1=CC(=O)[C@H](CC1)C(C)C	C10H16O	152.23	High	0	0.55	Yinyanghuo	(6R)-6-isopropyl-3-methyl-1-cyclohex-2-enone
EXD-102	C=CCc1ccc(c(c1)OC)OC	C11H14O2	178.23	High	0	0.55	Yinyanghuo	Methyleugenol
EXD-103	O[C@H]1C[C@@H]2C([C@@]1(C)CC2)(C)C	C10H18O	154.25	High	0	0.55	Yinyanghuo	()-Borneol
EXD-106	C/C=C/c1cc(OC)c2c(c1)[C@@H](C)[C@@H](O2)c1ccc(c(c1)OC)OC	C21H24O4	340.41	High	0	0.55	Yinyanghuo	(2R,3R)-2-(3,4-dimethoxyphenyl)-7-methoxy-3-methyl-5-[(E)-prop-1-enyl]-2,3-dihydrobenzofuran
EXD-109	Oc1ccc(cc1)c1oc2cc(O)cc(c2c(=O)c1O)O	C15H10O6	286.24	High	0	0.55	Yinyanghuo	kaempferol
EXD-111	Cc1cc(O)c2c(c1)C(=O)c1c(C2=O)c(O)cc(c1)O	C15H10O5	270.24	High	0	0.55	Yinyanghuo	emodin
EXD-112	CC1=CC=CC(CC1=O)(C)C	C10H14O	150.22	High	0	0.55	Yinyanghuo	Eucarvone
EXD-114	O=C1O[C@H]2[C@H](C1=C)CC[C@@]([C@H]1[C@@H]2[C@](C)(O)CC1)(C)O	C15H22O4	266.33	High	0	0.55	Yinyanghuo	Magnograndiolide
EXD-115	CCCCCCO	C6H14O	102.17	High	0	0.55	Yinyanghuo	1-hexanol
EXD-116	C[C@H]1CC[C@@]2([C@@]3([C@H]1C[C@H](C2(C)C)CC3)C)O	C15H26O	222.37	High	0	0.55	Yinyanghuo	patchouli alcohol
EXD-117	COc1cc2C[C@@](O)(CO)[C@@H]([C@H](c2cc1O)c1ccc(c(c1)OC)O)CO	C20H24O7	376.4	High	0	0.55	Yinyanghuo	(+)-Cycloolivil
EXD-123	CC(=O)/C=C/[C@@H]1C(=CCCC1(C)C)C	C13H20O	192.3	High	0	0.55	Yinyanghuo	24190-29-2
EXD-125	Oc1ccc(cc1)/C=C/C(=O)c1ccc(cc1O)O	C15H12O4	256.25	High	0	0.55	Yinyanghuo	isoliquiritigenin
EXD-126	Oc1ccc(cc1)[C@@H]1CC(=O)c2c(O1)cc(cc2)O	C15H12O4	256.25	High	0	0.55	Yinyanghuo	DFV
EXD-127	C[C@@H]1CCC(=C(C)C)C(=O)C1	C10H16O	152.23	High	0	0.55	Yinyanghuo	Pulegone
EXD-128	O=C1[C@@]2(C)CC[C@@H](C1(C)C)C2	C10H16O	152.23	High	0	0.55	Yinyanghuo	(1S,4R)-fenchone
EXD-129	COc1cc(cc(c1O)OC)c1cc(=O)c2c(o1)cc(cc2O)O	C17H14O7	330.29	High	0	0.55	Yinyanghuo	tricin
EXD-132	COc1ccc(cc1)CC=C	C10H12O	148.2	High	0	0.55	Yinyanghuo	Terragon
EXD-136	COc1ccc2c(c1O)c1c(O)c(OC)cc3c1[C@H](C2)[N](C)(C)CC3	C20H24NO4	342.41	High	0	0.55	Yinyanghuo	magnoflorine
EXD-137	OC[C@@H]1O[C@@H](OCCc2ccc(cc2)O)[C@H]([C@@H]([C@@H]1O)O)O	C14H20O7	300.3	High	0	0.55	Yinyanghuo	salidroside
EXD-138	OCCc1ccc(cc1)O	C8H10O2	138.16	High	0	0.55	Yinyanghuo	Tyrosol
EXD-140	COc1cc(ccc1O)c1cc(=O)c2c(o1)cc(cc2O)O	C16H12O6	300.26	High	0	0.55	Yinyanghuo	Chryseriol
EXD-141	COc1ccc(cc1)c1cc(=O)c2c(o1)cc(cc2O)OC	C17H14O5	298.29	High	0	0.55	Yinyanghuo	Flavone der.
EXD-142	O=c1ccoc(c1O)C	C6H6O3	126.11	High	0	0.55	Yinyanghuo	Vetol
EXD-143	C/C=C\C(=O)C1=C(C)C=CCC1(C)C	C13H18O	190.28	High	0	0.55	Yinyanghuo	Damascenone
EXD-144	CC(=CCc1c(O)cc(c2c1oc(c1ccc(cc1)O)c(c2=O)O)O)C	C20H18O6	354.35	High	0	0.55	Yinyanghuo	8-Isopentenyl-kaempferol
EXD-145	C/C=C/c1cc(OC)c(cc1OC)OC	C12H16O3	208.25	High	0	0.55	Yinyanghuo	Azaron
EXD-147	COc1cc(OC)cc(c1)C	C9H12O2	152.19	High	0	0.55	Yinyanghuo	3,5-Dimethoxytoluene
EXD-148	C[C@@H]1CC[C@@H]([C@@H](C1)O)C(C)C	C10H20O	156.27	High	0	0.55	Yinyanghuo	Isomenthol
EXD-149	CCCCCCCCOC=O	C9H18O2	158.24	High	0	0.55	Yinyanghuo	Octyl formate
EXD-150	COc1cc(ccc1O)C[C@]1(O)CO[C@@H]([C@H]1CO)c1ccc(c(c1)OC)O	C20H24O7	376.4	High	0	0.55	Yinyanghuo	olivil
EXD-153	Oc1ccc2c(c1)oc(c(c2=O)O)c1cc(O)c(c(c1)O)O	C15H10O7	302.24	High	0	0.55	Yinyanghuo	Robinetin
EXD-156	COc1ccc(cc1)c1oc2c(CC=C(C)C)c(O)cc(c2c(=O)c1O)O	C21H20O6	368.38	High	0	0.55	Yinyanghuo	Anhydroicaritin
EXD-160	COc1ccc(cc1)c1oc2c(CCC(O)(C)C)c(O)cc(c2c(=O)c1O)O	C21H22O7	386.4	High	0	0.55	Yinyanghuo	wanepimedoside_qt
EXD-162	COc1c(O)cc(cc1O)c1cc(=O)c2c(o1)cc(c(c2)CC=C(C)C)O	C21H20O6	368.38	High	0	0.55	Yinyanghuo	wushanicariin_qt
EXD-163	CO[C@H]1CC=C2[C@]3(C1)N(CCCc1c3cc(OC)c(c1)OC)CC2	C20H27NO3	329.43	High	0	0.55	Yinyanghuo	C-Homoerythrinan, 1,6-didehydro-3,15,16-trimethoxy-, (3.beta.)-
EXD-164	COc1cc2C[C@@](C)(O)[C@H](C)Cc3c(c2c(c1OC)OC)c(OC)c1c(c3)OCO1	C23H28O7	416.46	High	0	0.55	Yinyanghuo	Besigomsin
EXD-165	Oc1cc(O)c2c(c1)oc(cc2=O)c1cc(C[C@@H](C(=C)C)O)c2c(c1)C=CC(O2)(C)C	C25H24O6	420.45	High	0	0.55	Yinyanghuo	Yinyanghuo A
EXD-166	CC(=CCc1cc(cc(c1O)C[C@H](C(=C)C)O)c1cc(=O)c2c(o1)cc(cc2O)O)C	C25H26O6	422.47	High	0	0.55	Yinyanghuo	Yinyanghuo B
EXD-167	Oc1cc(O)c2c(c1)oc(cc2=O)c1ccc2c(c1)C=CC(O2)(C)C	C20H16O5	336.34	High	0	0.55	Yinyanghuo	Yinyanghuo C
EXD-168	CC(=CCc1cc(ccc1O)c1cc(=O)c2c(o1)cc(cc2O)O)C	C20H18O5	338.35	High	0	0.55	Yinyanghuo	Yinyanghuo D
EXD-169	Oc1cc(O)c2c(c1)oc(cc2=O)c1cc(O)c2c(c1)C=CC(O2)(C)C	C20H16O6	352.34	High	0	0.55	Yinyanghuo	Yinyanghuo E
EXD-171	COc1ccc2c(c1OC)c1c(oc2=O)c(O)cc2c1C(=O)[N](CC2)(C)C	C20H20NO6	370.38	High	0	0.55	Yinyanghuo	6-hydroxy-11,12-dimethoxy-2,2-dimethyl-1,8-dioxo-2,3,4,8-tetrahydro-1H-isochromeno[3,4-h]isoquinolin-2-ium
EXD-172	CC/C=C/CCO[C@@H]1O[C@H](CO)[C@H]([C@@H]([C@H]1O)O)O	C12H22O6	262.3	High	0	0.55	Yinyanghuo	3-Hexenyl-beta-glucopyranoside
EXD-173	CC(=CCc1cc(ccc1O)c1cc(=O)c2c(o1)c(CC=C(C)C)c(cc2O)O)C	C25H26O5	406.47	High	0	0.55	Yinyanghuo	5,7,4'-trihydroxy8,3'-diprenylflavone
EXD-174	CC(=CCc1cccc2c1oc(cc2=O)c1ccccc1)C	C20H18O2	290.36	High	0	0.55	Yinyanghuo	8-(3-methylbut-2-enyl)-2-phenyl-chromone
EXD-176	COc1ccc(cc1)c1oc2c3CCC(Oc3cc(c2c(=O)c1O)O)(C)C	C21H20O6	368.38	High	0	0.55	Yinyanghuo	anhydroicaritin
EXD-178	COc1cc(O)c2c(c1CC=C(C)C)oc(cc2=O)c1ccc(cc1)O	C21H20O5	352.38	High	0	0.55	Yinyanghuo	artonin U
EXD-179	OC[C@H]([C@H](c1ccc(c(c1)OC)O)O)c1ccc(c(c1)OC)O	C17H20O6	320.34	High	0	0.55	Yinyanghuo	1,2-bis(4-hydroxy-3-methoxyphenyl)propan-1,3-diol
EXD-183	CC(Cc1occ(c1)[C@H]1CC=C([C@@H](C1)O)C)C	C15H22O2	234.33	High	0	0.55	Yinyanghuo	Bilobanol
EXD-185	COc1ccc(cc1)c1oc2c(CCC(OC)(C)C)c(O)cc(c2c(=O)c1O)O	C22H24O7	400.42	High	0	0.55	Yinyanghuo	brevicornin
EXD-189	CC(=O)CCCCCCCCCCCCC(=O)C	C16H30O2	254.41	High	0	0.55	Yinyanghuo	2,15-Hexadecanedione
EXD-191	COc1ccc(cc1)c1oc2c(CC=C(C)C)c(O)ccc2c(=O)c1O	C21H20O5	352.38	High	0	0.55	Yinyanghuo	Epimedin C_qt
EXD-193	O=c1cc(O)c(c(o1)C)O	C6H6O4	142.11	High	0	0.55	Yinyanghuo	epimedokoreanone A
EXD-200	C[C@@H]1CC[C@H]2[C@@H]1[C@H]1[C@H](C1(C)C)CC[C@]2(C)O	C15H26O	222.37	High	0	0.55	Yinyanghuo	globulol
EXD-205	OC[C@@H]1[C@H](O[C@@H]([C@H]1CO)c1cc(OC)c(c(c1)OC)O)c1cc(OC)c(c(c1)OC)O	C22H28O9	436.45	High	0	0.55	Yinyanghuo	Icaride A2
EXD-209	COc1cc2c(cc1O)ccc1c2c(OC)c(c(c1)O)OC	C17H16O5	300.31	High	0	0.55	Yinyanghuo	3,4,6-trimethoxyphenanthrene-2,7-diol
EXD-223	OCCCc1cc2c(c(c1)OC)O[C@H]([C@H]2CO)c1ccc(c(c1)OC)O	C20H24O6	360.4	High	0	0.55	Yinyanghuo	C20H24O6
EXD-226	Oc1cc(O)c2c(c1)oc(c(c2=O)O)c1ccc(c(c1)O)O	C15H10O7	302.24	High	0	0.55	Yinyanghuo	C15H10O7
EXD-227	COc1cc(cc(c1O)OC)c1cc(=O)c2c(o1)cc(cc2O)O	C17H14O7	330.29	High	0	0.55	Yinyanghuo	C17H14O7
EXD-228	OCC(C(c1ccc(c(c1)OC)O)O)c1ccc(c(c1)OC)O	C17H20O6	320.34	High	0	0.55	Yinyanghuo	C17H20O6
EXD-229	OC[C@H]1O[C@@H](OC(CCC2C(=CC(=O)CC2(C)C)C)C)[C@@H]([C@H]([C@@H]1O)O)O	C19H32O7	372.45	High	0	0.55	Yinyanghuo	C19H32O7
EXD-235	COc1cc(cc(c1O)OC)c1cc(=O)c2c(o1)c(CC=C(C)C)c(cc2O)O	C22H22O7	398.41	High	0	0.55	Yinyanghuo	C22H22O7
EXD-238	OC[C@H]1O[C@@H](Oc2cc3CCc4c(c3cc2OC)c(OC)c(c(c4)OC)OC)[C@@H]([C@H]([C@@H]1O)O)O	C24H30O10	478.49	High	0	0.55	Yinyanghuo	C24H30O10
EXD-244	OC[C@H]1O[C@@H](O[C@H]2CC(=C(C(C2)(C)C)CCC(=O)C)C)[C@@H]([C@H]([C@@H]1O)O)O	C19H32O7	372.45	High	0	0.55	Yinyanghuo	C19H32O7
EXD-245	OC[C@H]1O[C@@H](O[C@@H]2CCC(=C(C2(C)C)CCC(=O)C)C)[C@@H]([C@H]([C@@H]1O)O)O	C19H32O7	372.45	High	0	0.55	Yinyanghuo	C19H32O7
EXD-246	COc1ccc(cc1)C(=O)CO[C@@H]1O[C@@H](C)[C@@H]([C@H]([C@H]1O)O)O	C15H20O7	312.32	High	0	0.55	Yinyanghuo	C15H20O8
EXD-248	OC[C@@H]1[C@H](O[C@@H]([C@H]1CO)c1cc(OC)c(c(c1)OC)O)c1cc(OC)c(c(c1)OC)O	C22H28O9	436.45	High	0	0.55	Yinyanghuo	C22H28O9
EXD-252	COc1ccc(cc1)c1oc2c(CC=C(C)C)c(O)cc(c2c(=O)c1O)O	C21H20O6	368.38	High	0	0.55	Yinyanghuo	C21H20O6
EXD-255	COc1cc2ccc(=O)oc2cc1O	C10H8O4	192.17	High	0	0.55	Danggui	Scopoletol
EXD-256	CCCCCCCCC=O	C9H18O	142.24	High	0	0.55	Danggui	Nonanal
EXD-258	CCCCCCCCCC=O	C10H20O	156.27	High	0	0.55	Danggui	Decanal
EXD-262	C=CCc1ccc2c(c1)OCO2	C10H10O2	162.19	High	0	0.55	Danggui	Safrol
EXD-265	C/C=C/c1ccc(c(c1)OC)O	C10H12O2	164.2	High	0	0.55	Danggui	isoeugenol
EXD-266	CC1=CC[C@@H](CC1)C(O)(C)C	C10H18O	154.25	High	0	0.55	Danggui	()-alpha-Terpineol
EXD-267	CC(c1ccc(c(c1)O)C)C	C10H14O	150.22	High	0	0.55	Danggui	o-Thymol
EXD-276	COc1cc(C=O)ccc1O	C8H8O3	152.15	High	0	0.55	Danggui	vanillin
EXD-277	CCCCCCC=O	C7H14O	114.19	High	0	0.55	Danggui	WLN: VH6
EXD-280	O=Cc1ccc(cc1)C(C)C	C10H12O	148.2	High	0	0.55	Danggui	cuminal
EXD-281	CCCCCCCCCCCCCCO	C14H30O	214.39	High	0	0.55	Danggui	Loxanol V
EXD-283	CC1=CC(=O)[C@@H]2C[C@H]1C2(C)C	C10H14O	150.22	High	0	0.55	Danggui	80-57-9
EXD-285	Cc1ccc(c(c1)C(=O)C)O	C9H10O2	150.17	High	0	0.55	Danggui	o-Acetyl-p-cresol
EXD-287	C[C@@H]1CC[C@H]2[C@@H]1[C@H]1[C@H](C1(C)C)CC[C@@]2(C)O	C15H26O	222.37	High	0	0.55	Danggui	(+)-Ledol
EXD-288	CC(=O)c1ccccc1	C8H8O	120.15	High	0	0.55	Danggui	Hypnon
EXD-289	Nc1ncnc2c1nc[nH]2	C5H5N5	135.13	High	0	0.55	Danggui	adenine
EXD-292	CCC/C=C/1\OC(=O)c2c1cccc2O	C12H12O3	204.22	High	0	0.55	Danggui	3-Butylidene-7-hydroxyphthalide
EXD-295	CCC/C=C\1/OC(=O)c2c1cccc2	C12H12O2	188.22	High	0	0.55	Danggui	BdPh
EXD-296	CCC/C=C\1/OC(=O)c2c1cc(O)cc2	C12H12O3	204.22	High	0	0.55	Danggui	senkyunolide-C
EXD-297	CCCC(=O)[C@]1(O)OC(=O)C2=C1CCC=C2	C12H14O4	222.24	High	0	0.55	Danggui	senkyunolide-D
EXD-298	CC[C@H](/C=C/1\OC(=O)c2c1cccc2)O	C12H12O3	204.22	High	0	0.55	Danggui	senkyunolide-E
EXD-299	CCCCC(=O)CCC	C8H16O	128.21	High	0	0.55	Danggui	4-Octanone
EXD-301	CCC/C=C\1/OC(=O)C2=C1CCC=C2	C12H14O2	190.24	High	0	0.55	Danggui	cis-ligustilide
EXD-302	C=CC(O)(C)C	C5H10O	86.13	High	0	0.55	Danggui	Methylbutenol
EXD-303	Cc1ccc(cc1)O	C7H8O	108.14	High	0	0.55	Danggui	PCR
EXD-305	COc1ccccc1O	C7H8O2	124.14	High	0	0.55	Danggui	Guasol
EXD-306	Oc1ccccc1	C6H6O	94.11	High	0	0.55	Danggui	IPH
EXD-309	CCc1ccc(cc1)O	C8H10O	122.16	High	0	0.55	Danggui	Maruzen M
EXD-310	Cc1ccccc1O	C7H8O	108.14	High	0	0.55	Danggui	o-cresol
EXD-313	CCCC=O	C4H8O	72.11	High	0	0.55	Danggui	Butal
EXD-316	CSCC[C@@H](C(=O)O)N	C5H11NO2S	149.21	High	0	0.55	Danggui	h-Met-h
EXD-317	O=Cc1ccc(c(c1)C)C	C9H10O	134.18	High	0	0.55	Danggui	3,4-DIMETHYLBENZALDEHYDE
EXD-318	CCc1ccc(cc1)C=O	C9H10O	134.18	High	0	0.55	Danggui	ETHYLBENZALDEHYDE
EXD-319	Oc1cc(C)c(c(c1C)C)O	C9H12O2	152.19	High	0	0.55	Danggui	TMHYDROP
EXD-321	Oc1ccc(c(c1)O)C(=O)C	C8H8O3	152.15	High	0	0.55	Danggui	WLN: QR CQ DV1
EXD-329	O=C1OC(=O)c2c1cccc2	C8H4O3	148.12	High	0	0.55	Danggui	ESEN
EXD-330	CCCC[C@H]1OC(=O)C2=CCCC[C@H]12	C12H18O2	194.27	High	0	0.55	Danggui	sedanolide
EXD-331	CCCC[C@H]1OC(=O)C2=C1CCC=C2	C12H16O2	192.25	High	0	0.55	Danggui	senkyunolide
EXD-332	CCCCCCCCCCCCC/C=C/[C@H]([C@H](COP(=O)(OCC[N](C)(C)C)O)NC=O)O	C24H50N2O6P	493.64	High	0	0.55	Danggui	sphingomyelin
EXD-339	Cc1c(C)cccc1O	C8H10O	122.16	High	0	0.55	Danggui	o-Xylenol
EXD-341	O=Cc1c(C)cc(cc1C)C	C10H12O	148.2	High	0	0.55	Danggui	Mesitaldehyde
EXD-342	O=Cc1cc(C)ccc1C	C9H10O	134.18	High	0	0.55	Danggui	Isoxylaldehyde
EXD-345	CCCCCC(=O)OC/C=C/CCC	C12H22O2	198.3	High	0	0.55	Danggui	(Z)-2-Hexenyl hexanoate
EXD-347	C/C=C\c1ccc(c(c1)OC)O	C10H12O2	164.2	High	0	0.55	Danggui	cis-Isoeugenol
EXD-349	CCCCCCCC(=O)CCC(C)C	C13H26O	198.34	High	0	0.55	Danggui	2-methyldodecan-5-one
EXD-351	O=CC1=CC(=O)C(=CC1(C)C)C	C10H12O2	164.2	High	0	0.55	Danggui	1,1,5-trimethyl-2-formylcyclohexa-2,5-diene-4-one
EXD-352	C[C@@H](C(=O)CC)CC=C	C8H14O	126.2	High	0	0.55	Danggui	4-Methyl-6-hepten-3-one
EXD-353	CCc1ccc(cc1O)O	C8H10O2	138.16	High	0	0.55	Danggui	6-Ethylresorcinol
EXD-354	Oc1ccc2c(c1)cc[nH]2	C8H7NO	133.15	High	0	0.55	Danggui	5-Indolol
EXD-355	CCCCCC(CCCCC)O	C11H24O	172.31	High	0	0.55	Danggui	Undecanol-6
EXD-358	CCCCCC(=O)CCCCC	C11H22O	170.29	High	0	0.55	Danggui	Amyl ketone
EXD-361	O=c1cccccc1	C7H6O	106.12	High	0	0.55	Danggui	Tropone
EXD-364	CCCC[C@@H]1OC(=O)c2c1cccc2	C12H14O2	190.24	High	0	0.55	Danggui	(3S)-3-butyl-3H-isobenzofuran-1-one
EXD-366	CCC/C=C\1/OC(=O)c2c1cccc2O	C12H12O3	204.22	High	0	0.55	Danggui	(3E)-3-butylidene-7-hydroxy-2-benzofuran-1-one
EXD-367	COc1cc(/C=C/COC(=O)/C=C/c2ccc(c(c2)OC)O)ccc1O	C20H20O6	356.37	High	0	0.55	Danggui	Coniferyl ferulate
EXD-369	O=Cc1ccc(cc1C)C	C9H10O	134.18	High	0	0.55	Danggui	2,4-Xylylaldehyde
EXD-370	CCc1cccc(c1)O	C8H10O	122.16	High	0	0.55	Danggui	m-Ethylphenol
EXD-372	CCc1ccc(cc1O)O	C8H10O2	138.16	High	0	0.55	Danggui	C8H10O2
EXD-373	Oc1ccc(c(c1)O)C(=O)C	C8H8O3	152.15	High	0	0.55	Danggui	C8H8O3
EXD-375	O=[C]c1c(C)cc(cc1C)C	C10H11O	147.19	High	0	0.55	Danggui	C10H12O
EXD-376	CC1=CC(=O)C2CC1C2(C)C	C10H14O	150.22	High	0	0.55	Danggui	C10H14O
EXD-381	CCCCC1OC(=O)c2c1cccc2	C12H14O2	190.24	High	0	0.55	Danggui	C12H14O2
EXD-382	NCC(=O)O	C2H5NO2	75.07	High	0	0.55	Danggui	C2H5NO2
EXD-383	C[C@@H](C(=O)O)N	C3H7NO2	89.09	High	0	0.55	Danggui	C3H7NO2
EXD-384	O[C@@H]1C[C@@H]2[C@@H](C1)/C=C/CCC[C@@H](OC(=O)/C=C/[C@H]2O)C	C16H24O4	280.36	High	0	0.55	Danggui	C16H24O4
EXD-385	CSCC[C@@H](C(=O)O)N	C5H11NO2S	149.21	High	0	0.55	Danggui	C5H11NO2S
EXD-387	CCc1ccc(cc1)C=O	C9H10O	134.18	High	0	0.55	Danggui	C9H10O
EXD-388	Cc1ccc(cc1)O	C7H8O	108.14	High	0	0.55	Danggui	C7H8O
EXD-389	CCC(=C1OC(=O)c2c1cccc2)C	C12H12O2	188.22	High	0	0.55	Danggui	C12H12O2
EXD-390	CC=Cc1ccc(c(c1)OC)O	C10H12O2	164.2	High	0	0.55	Danggui	C10H12O2
EXD-392	C[C@H]([C@@H](C(=O)O)N)O	C4H9NO3	119.12	High	0	0.55	Danggui	C4H9NO3
EXD-394	O=C1OC(=O)c2c1cccc2	C8H4O3	148.12	High	0	0.55	Danggui	C8H4O3
EXD-396	O=c1cc[nH]c(=O)[nH]1	C4H4N2O2	112.09	High	0	0.55	Danggui	C4H4N2O2
EXD-399	[CH]C(=O)c1ccccc1	C8H6O	118.13	High	0	0.55	Danggui	C8H8O
EXD-400	N[C@H](C(=O)O)Cc1ccccc1	C9H11NO2	165.19	High	0	0.55	Danggui	C9H11NO2
EXD-403	N[C@H](C(=O)O)Cc1c[nH]cn1	C6H9N3O2	155.15	High	0	0.55	Danggui	C6H9N3O2
EXD-406	CC(C1=CC=C(C(=O)C1)C)C	C10H14O	150.22	High	0	0.55	Danggui	C10H14O
EXD-408	N[C@H](C(=O)O)CC(C)C	C6H13NO2	131.17	High	0	0.55	Danggui	C6H13NO2
EXD-409	CCCC[C@@H]1OC(=O)C2=C1CCC=C2	C12H16O2	192.25	High	0	0.55	Danggui	C12H16O2
EXD-413	C=CCc1ccc2c(c1)OCO2	C10H10O2	162.19	High	0	0.55	Danggui	C10H10O2
EXD-416	OC(=O)[C@@H]1CCCN1	C5H9NO2	115.13	High	0	0.55	Danggui	C5H9NO2
EXD-419	Nc1[nH]cnc2c1ncn2	C5H5N5	135.13	High	0	0.55	Danggui	C5H5N5
EXD-420	NCCCC[C@@H](C(=O)O)N	C6H14N2O2	146.19	High	0	0.55	Danggui	C6H14N2O2
EXD-421	OC(=O)[C@H](Cc1ccc(cc1)O)N	C9H11NO3	181.19	High	0	0.55	Danggui	C9H11NO3
EXD-422	COc1ccccc1O	C7H8O2	124.14	High	0	0.55	Danggui	C7H8O2
EXD-424	NC(=N)NCCC[C@@H](C(=O)O)N	C6H14N4O2	174.2	High	0	0.55	Danggui	C6H14N4O2
EXD-426	N[C@H](C(=O)O)C(C)C	C5H11NO2	117.15	High	0	0.55	Danggui	C5H11NO2
EXD-427	CCC(=C1OC(=O)C2=C1CCC=C2)C	C12H14O2	190.24	High	0	0.55	Danggui	C12H14O2
EXD-432	CCCCCCCC/C=C/C=O	C11H20O	168.28	High	0	0.55	Bajitian	Undecenal
EXD-433	OC/C=C(/CCC=C(C)C)\C	C10H18O	154.25	High	0	0.55	Bajitian	geraniol
EXD-435	CC(=O)O[C@@H]1C[C@H]2C([C@]1(C)CC2)(C)C	C12H20O2	196.29	High	0	0.55	Bajitian	L-Bornyl acetate
EXD-438	COc1cc(O)c2c(c1)C(=O)c1c(C2=O)c(O)cc(c1)C	C16H12O5	284.26	High	0	0.55	Bajitian	Physcion
EXD-439	CC1=CC[C@](CC1)(O)C(C)C	C10H18O	154.25	High	0	0.55	Bajitian	()-Terpinen-4-ol
EXD-441	CCCCCc1ccco1	C9H14O	138.21	High	0	0.55	Bajitian	PENTYLFURAN
EXD-442	O=C1C[C@H]2C([C@]1(C)CC2)(C)C	C10H16O	152.23	High	0	0.55	Bajitian	(S)-camphor
EXD-443	CCCCOC(=O)c1ccccc1C(=O)OCCCC	C16H22O4	278.34	High	0	0.55	Bajitian	DBP
EXD-444	CCCCCC(=O)C	C7H14O	114.19	High	0	0.55	Bajitian	2-heptanone
EXD-445	CCCC/C=C/C=O	C7H12O	112.17	High	0	0.55	Bajitian	Heptenal
EXD-446	O=Cc1ccccc1	C7H6O	106.12	High	0	0.55	Bajitian	WLN: VHR
EXD-447	CCCCCCCC=O	C8H16O	128.21	High	0	0.55	Bajitian	OYA
EXD-448	CCOC(=O)C	C4H8O2	88.11	High	0	0.55	Bajitian	EEE
EXD-450	C[C@@H]1CC[C@@H]2[C@@]31CC[C@@]([C@H](C3)C2(C)C)(C)O	C15H26O	222.37	High	0	0.55	Bajitian	Cedrol
EXD-454	CCCCCCCCCC(=O)C	C11H22O	170.29	High	0	0.55	Bajitian	Mnk
EXD-455	CCCCCCCCO	C8H18O	130.23	High	0	0.55	Bajitian	octanol
EXD-456	OCCc1ccccc1	C8H10O	122.16	High	0	0.55	Bajitian	PEL
EXD-457	OCc1ccccc1	C7H8O	108.14	High	0	0.55	Bajitian	WLN: Q1R
EXD-459	CCCCC/C=C/C=O	C8H14O	126.2	High	0	0.55	Bajitian	OCTENAL
EXD-464	O=C1c2cc(O)c(cc2C(=O)c2c1cccc2)C	C15H10O3	238.24	High	0	0.55	Bajitian	2-hydroxy-3-methylanthraquinone
EXD-469	c1ccc2c(c1)[nH]cc2	C8H7N	117.15	High	0	0.55	Bajitian	indole
EXD-470	CC1=CC(=O)CC(C1)(C)C	C9H14O	138.21	High	0	0.55	Bajitian	Izoforon
EXD-474	CC(=O)CCC=C(C)C	C8H14O	126.2	High	0	0.55	Bajitian	Sulcatone
EXD-476	Cc1cc(c(c(c1)C(C)(C)C)O)C(C)(C)C	C15H24O	220.35	High	0	0.55	Bajitian	butylated hydroxytoluene
EXD-479	O[C@@H]1C[C@H]2C([C@]1(C)CC2)(C)C	C10H18O	154.25	High	0	0.55	Bajitian	[(1S)-endo]-(-)-Borneol
EXD-483	Cc1cc2c(o1)cccc2	C9H8O	132.16	High	0	0.55	Bajitian	METHYLBENZOFURAN
EXD-484	O=c1ccc2c(o1)cc(c(c2)O)O	C9H6O4	178.14	High	0	0.55	Bajitian	esculetin
EXD-485	Cc1ccc2c(c1O)C(=O)c1c(C2=O)c(O)c(cc1)O	C15H10O5	270.24	High	0	0.55	Bajitian	Morindon
EXD-486	Cc1ccc2c(c1)C(=O)c1c(C2=O)cccc1	C15H10O2	222.24	High	0	0.55	Bajitian	Tectochinon
EXD-487	CCCCCCCCCCCCCC(=O)C	C15H30O	226.4	High	0	0.55	Bajitian	2-PENTADECANONE
EXD-488	CCC(C(=C(C)C)C)(C(=O)C)CC	C12H22O	182.3	High	0	0.55	Bajitian	3,3-diethyl-4,5-dimethylhex-4-en-2-one
EXD-491	CCCCCCC[C@H]1CCC(=O)O1	C11H20O2	184.28	High	0	0.55	Bajitian	gamma-Undecalactone
EXD-495	COc1c(O)c(OC)cc2c1oc(=O)cc2	C11H10O5	222.19	High	0	0.55	Bajitian	Phytodolor
EXD-497	COc1ccc2c(c1O)C(=O)c1c(C2=O)cccc1	C15H10O4	254.24	High	0	0.55	Bajitian	Alizarin-2-methylether
EXD-498	OCc1ccc2c(c1O)C(=O)c1c(C2=O)cccc1	C15H10O4	254.24	High	0	0.55	Bajitian	Deoxylucidin
EXD-499	O=C1c2ccccc2C(=O)c2c1c(O)c(c(c2)O)C	C15H10O4	254.24	High	0	0.55	Bajitian	Rubiadin
EXD-500	O=C1c2ccccc2C(=O)c2c1ccc(c2O)C	C15H10O3	238.24	High	0	0.55	Bajitian	1-Hydroxy-2-methylanthraquinone
EXD-501	O[C@H]1C[C@H]2CC[C@]1(C)OC2(C)C	C10H18O2	170.25	High	0	0.55	Bajitian	60761-00-4
EXD-504	CCCCC[C@H]1CCC(=O)O1	C9H16O2	156.22	High	0	0.55	Bajitian	(S)-4-Nonanolide
EXD-505	CC[C@@H]1[C@@H](C)CCC[C@]1(N)CC	C11H23N	169.31	High	0	0.55	Bajitian	1,2-diethyl-3-methylcyclohexylamine
EXD-506	O=C1c2ccccc2C(=O)c2c1c(O)c(c(c2)C)O	C15H10O4	254.24	High	0	0.55	Bajitian	1,2-dihydroxy-3-methyl-9,10-anthraquinone
EXD-507	COc1c(O)cc2c(c1O)C(=O)c1c(C2=O)cccc1	C15H10O5	270.24	High	0	0.55	Bajitian	1,3-Dihydroxy-2-methoxyanthraquinone
EXD-508	COc1cc(O)c2c(c1O)C(=O)c1c(C2=O)ccc(c1)C	C16H12O5	284.26	High	0	0.55	Bajitian	1,4-dihydroxy-2-methoxy-7-methylanthracenequinone
EXD-509	COCc1ccc2c(c1OC)C(=O)c1c(C2=O)c(OC)c(cc1)O	C18H16O6	328.32	High	0	0.55	Bajitian	2-hydroxy-1,5-dimethoxy-6-(methoxymethyl)-9,10-anthraquinone
EXD-510	COCc1ccc2c(c1O)C(=O)c1c(C2=O)c(O)c(c(c1)O)OC	C17H14O7	330.29	High	0	0.55	Bajitian	1,5,7-trihydroxy-6-methoxy-2-methoxymethylanthracenequinone
EXD-511	CC[C@H]1C[C@@H](C)[C@H]([C@@](C1)(N)CC)C	C12H25N	183.33	High	0	0.55	Bajitian	1,5-diethyl-2,3-dimethylcyclohexylamine
EXD-512	COc1cc(OC)c(c2c1C(=O)c1cc(O)ccc1C2=O)O	C16H12O6	300.26	High	0	0.55	Bajitian	1,6-Dihydroxy-2,4-dimethoxyanthraquinone
EXD-513	COc1ccc2c(c1O)C(=O)c1c(C2=O)cc(cc1)O	C15H10O5	270.24	High	0	0.55	Bajitian	1,6-Dihydroxy-2-methoxyanthraquinone
EXD-514	COCc1ccc2c(c1O)C(=O)c1c(C2=O)c(OC)c(cc1)O	C17H14O6	314.29	High	0	0.55	Bajitian	1,6-dihydroxy-5-methoxy-2-(methoxymethyl)-9,10-anthraquinone
EXD-515	O=C1c2ccccc2C(=O)c2c1c(O)c(c(c2)C)C	C16H12O3	252.26	High	0	0.55	Bajitian	1-hydroxy-2,3-dimethyl-9,10-anthraquinone
EXD-516	OCc1cc(O)c2c(c1)C(=O)c1c(C2=O)cccc1	C15H10O4	254.24	High	0	0.55	Bajitian	1-hydroxy-3-methylol-9,10-anthraquinone
EXD-517	COc1cc(O)c2c(c1)C(=O)c1c(C2=O)cccc1	C15H10O4	254.24	High	0	0.55	Bajitian	1-hydroxy-3-methoxy-9,10-anthraquinone
EXD-518	OCc1ccc2c(c1)C(=O)c1c(C2=O)c(O)ccc1	C15H10O4	254.24	High	0	0.55	Bajitian	1-hydroxy-6-hydroxymethylanthracenequinone
EXD-519	OCc1ccc2c(c1)C(=O)c1c(C2=O)cccc1O	C15H10O4	254.24	High	0	0.55	Bajitian	1-hydroxy-7-hydroxymethylanthracenequinone
EXD-520	Oc1cccc2c1C(=O)c1ccccc1C2=O	C14H8O3	224.21	High	0	0.55	Bajitian	Hydroxyanthraquinone
EXD-521	CC(C[C@@]1(N)C[C@@H](C)CC[C@H]1C)C	C12H25N	183.33	High	0	0.55	Bajitian	1-isobutyl-2,5-dimethylcyclohexylamine
EXD-526	COC(=O)c1ccc2c(c1)C(=O)c1c(C2=O)cccc1	C16H10O4	266.25	High	0	0.55	Bajitian	methyl 9,10-dioxoanthracene-2-carboxylate
EXD-527	COCc1ccc2c(c1OC)C(=O)c1c(C2=O)ccc(c1OC)O	C18H16O6	328.32	High	0	0.55	Bajitian	2-hydroxy-1,8-dimethoxy-7-methoxymethylanthracenequinone
EXD-528	COc1c(O)ccc2c1C(=O)c1c(C2=O)cccc1	C15H10O4	254.24	High	0	0.55	Bajitian	1-methoxy-2-hydroxyanthraquinone
EXD-529	OCc1cc2c(cc1O)C(=O)c1c(C2=O)cccc1	C15H10O4	254.24	High	0	0.55	Bajitian	2-hydroxy-3-hydroxymethylanthracenequinone
EXD-530	Oc1ccc2c(c1)C(=O)c1c(C2=O)cccc1	C14H8O3	224.21	High	0	0.55	Bajitian	2-Hydroxyanthraquinone
EXD-531	COc1c(O)cc2c(c1O)C(=O)c1c(C2=O)cc(cc1)O	C15H10O6	286.24	High	0	0.55	Bajitian	1,3,6-trihydroxy-2-methoxy-9,10-anthraquinone
EXD-533	COc1cc2O[C@H](c3ccc(c(c3)O)OC)[C@@H](C(=O)c2c(c1)O)O	C17H16O7	332.3	High	0	0.55	Bajitian	(2R,3S)-(+)-3',5-Dihydroxy-4 ,7-dimethoxydihydroflavonol
EXD-535	COc1c2C(=O)c3ccccc3C(=O)c2cc(c1OC)O	C16H12O5	284.26	High	0	0.55	Bajitian	3-hydroxy-1,2-dimethoxyanthracenequinone
EXD-537	C#Cc1cccc(c1)O	C8H6O	118.13	High	0	0.55	Bajitian	3-Ethynylphenol
EXD-541	COc1cc(OC)c(c2c1C(=O)c1ccccc1C2=O)CO	C17H14O5	298.29	High	0	0.55	Bajitian	4-hydroxymethyl-1,3-dimethoxyanthracenequinone
EXD-542	C[C@@H]([C@H]1CCC(=O)O1)O	C6H10O3	130.14	High	0	0.55	Bajitian	(4R,5S)-5-hydroxyhexan-4-olide
EXD-545	O[C@@H]1C=C([C@@H]2[C@@H]1C=CO[C@H]2O)O	C8H10O4	170.16	High	0	0.55	Bajitian	6-alpha-hydroxyadoxoside_qt
EXD-550	CCOc1c(O)ccc2c1C(=O)c1ccccc1C2=O	C16H12O4	268.26	High	0	0.55	Bajitian	alizarin-1-methyl ether
EXD-551	O=C/C=C/c1ccc2c(c1)O[C@@H]([C@@H](O2)c1ccc(c(c1)O)O)CO	C18H16O6	328.32	High	0	0.55	Bajitian	americanin A
EXD-552	OC/C=C/c1ccc2c(c1)O[C@@H]([C@H](O2)c1ccc(c(c1)O)O)CO	C18H18O6	330.33	High	0	0.55	Bajitian	4-[3-Hydroxymethyl-6-(3-hydroxy-propenyl)-2,3-dihydro-benzo[1,4]dioxin-2-yl]-benzene-1,2-diol
EXD-553	O=Cc1ccc2c(c1)C(=O)c1c(C2=O)cccc1	C15H8O3	236.22	High	0	0.55	Bajitian	2-Anthraquinonecarboxaldehyde
EXD-556	OCC(Cc1cccc(c1)C)(C)C	C12H18O	178.27	High	0	0.55	Bajitian	Majantol
EXD-557	O[C@@H]1Cc2c1cccc2	C8H8O	120.15	High	0	0.55	Bajitian	ZINC03107553
EXD-565	OC[C@H]1Oc2ccc(cc2O[C@@H]1c1ccc(c(c1)O)O)[C@H]1OC[C@H]2[C@@H]1CO[C@@H]2c1ccc(c(c1)O)O	C27H26O9	494.49	High	0	0.55	Bajitian	isoprincepin
EXD-566	O=Cc1cccc(c1)C	C8H8O	120.15	High	0	0.55	Bajitian	m-Tolualdehyde
EXD-569	OCC1=C[C@H]2[C@@H]([C@@H]1CO)[C@@H](C(=O)O2)CO	C10H14O5	214.22	High	0	0.55	Bajitian	morindacin
EXD-570	OCC1=CC[C@H]2[C@@H]1C(=O)OCC2	C9H12O3	168.19	High	0	0.55	Bajitian	(4aR,7aS)-7-methylol-4,4a,5,7a-tetrahydro-3H-cyclopenta[c]pyran-1-one
EXD-572	OCCOC(=O)c1cc(O)c(cc1C(=O)c1ccccc1O)CO	C17H16O7	332.3	High	0	0.55	Bajitian	2-hydroxyethyl 5-hydroxy-2-(2-hydroxybenzoyl)-4-(hydroxymethyl)benzoate
EXD-575	CCCCO[C@@]12OC[C@H]([C@@H]([C@]2([C@@H]1O)CO)O)O	C11H20O6	248.27	High	0	0.55	Bajitian	officinalisin
EXD-576	Oc1ccc2c(c1)[C@@H]1Oc3ccccc3[C@@H]3[C@H]1c1c2c(O)cc(c1C(=O)C3)O	C23H16O5	372.37	High	0	0.55	Bajitian	Ohioensin-A
EXD-577	OCC(CO)(C)C	C5H12O2	104.15	High	0	0.55	Bajitian	NPG
EXD-579	COc1c2C(=O)c3ccccc3C(=O)c2cc(c1C)O	C16H12O4	268.26	High	0	0.55	Bajitian	Rubiadin-1-methyl ether
EXD-580	O=C1c2ccccc2C(=O)c2c1c(O)c(c(c2)O)C	C15H10O4	254.24	High	0	0.55	Bajitian	C15H10O4
EXD-582	COc1cc(O)c2c(c1)C(=O)c1c(C2=O)c(O)cc(c1)C	C16H12O5	284.26	High	0	0.55	Bajitian	C16H12O5
EXD-585	COc1c2C(=O)c3ccccc3C(=O)c2cc(c1C)O	C16H12O4	268.26	High	0	0.55	Bajitian	C16H12O4
EXD-586	Cc1ccc2c(c1)C(=O)c1c(C2=O)cccc1	C15H10O2	222.24	High	0	0.55	Bajitian	C15H10O2
EXD-587	Oc1cccc2c1C(=O)c1ccccc1C2=O	C14H8O3	224.21	High	0	0.55	Bajitian	C14H8O3
EXD-591	OC/C=C\c1cc(OC)c(c(c1)OC)O	C11H14O4	210.23	High	0	0.55	Huangbai	4-[(Z)-3-hydroxyprop-1-enyl]-2,6-dimethoxyphenol
EXD-592	Oc1ccc(cc1)[C@@H]1Oc2cc(O)cc(c2C(=O)[C@H]1O)O	C15H12O6	288.25	High	0	0.55	Huangbai	(2S,3S)-3,5,7-trihydroxy-2-(4-hydroxyphenyl)chroman-4-one
EXD-594	COc1ccc2c(c1O)c1c(O)c(OC)cc3c1[C@@H](C2)[N](C)(C)CC3	C20H24NO4	342.41	High	0	0.55	Huangbai	magnoflorine
EXD-595	COc1ccc2c(c1)C(=O)c1c3c2nccc3cc(c1OC)OC	C19H15NO4	321.33	High	0	0.55	Huangbai	Menisporphine
EXD-596	COC1CCC2C(C1OC)CN1C(C2)c2cc(OC)c(cc2CC1)OC	C21H31NO4	361.48	High	0	0.55	Huangbai	palmatine
EXD-597	CN1CCc2cc3OCOc3cc2C(=O)Cc2c(C1)c1OCOc1cc2	C20H19NO5	353.37	High	0	0.55	Huangbai	Fumarine
EXD-598	COc1cc2CCN3[C@H](c2cc1O)Cc1c(C3)c(OC)c(cc1)OC	C20H23NO4	341.4	High	0	0.55	Huangbai	Isocorypalmine
EXD-600	COC1C(OC)CCC2C1CN1CCc3c(C1C2)cc1c(c3)OCO1	C20H27NO4	345.43	High	0	0.55	Huangbai	berberine
EXD-601	C1OC2C(O1)CCC1C2CN2CCc3c(C2C1)cc1c(c3)OCO1	C19H23NO4	329.39	High	0	0.55	Huangbai	coptisine
EXD-604	CC(=C)[C@H]1CC=C(C(=O)C1)C	C10H14O	150.22	High	0	0.55	Huangbai	(s)-carvone
EXD-605	OC[C@H]1Cc2cc(OC)c(c(c2[C@@H]([C@H]1CO)c1cc(OC)c(c(c1)OC)O)OC)O	C22H28O8	420.45	High	0	0.55	Huangbai	(±)-lyoniresinol
EXD-610	Oc1ccc(cc1)[C@H]1Oc2cc(O)c(c(c2C(=O)[C@@H]1O)O)CCC(O)(C)C	C20H22O7	374.38	High	0	0.55	Huangbai	Phellavin_qt
EXD-611	COc1cc2C[N@]3(C)CCc4c([C@@H]3Cc2cc1O)cc(c(c4)OC)O	C20H24NO4	342.41	High	0	0.55	Huangbai	phellodendrine
EXD-613	COc1c2ccoc2c(c2c1ccc(=O)o2)OCC=C(C)C	C17H16O5	300.31	High	0	0.55	Huangbai	Phellopterin
EXD-614	NCCc1ccccc1	C8H11N	121.18	High	0	0.55	Huangbai	PEA
EXD-616	COc1cc(CO)ccc1O	C8H10O3	154.16	High	0	0.55	Huangbai	Vanillyl alcohol
EXD-617	CC(=C)[C@@H]1CC[C@@]2([C@H](C1)O2)C	C10H16O	152.23	High	0	0.55	Huangbai	(4R)-limonene 1beta,2beta-epoxide
EXD-618	OC/C=C/c1ccc(c(c1)OC)O[C@@H]1O[C@H](CO)[C@H]([C@@H]([C@H]1O)O)O	C16H22O8	342.34	High	0	0.55	Huangbai	Coniferin
EXD-619	OC/C=C/c1ccc(c(c1)OC)O	C10H12O3	180.2	High	0	0.55	Huangbai	Coniferol
EXD-620	O=C1c2c3C=CCC(c3ccc2c2c(C1=O)c(C)co2)(C)C	C19H16O3	292.33	High	0	0.55	Huangbai	Dehydrotanshinone II A
EXD-621	O=c1cccc2n1C[C@H]1CCCN3[C@H]1C2=CCC3	C15H18N2O	242.32	High	0	0.55	Huangbai	delta7-Dehydrosophoramine
EXD-622	COc1c2ccccc2nc2c1cco2	C12H9NO2	199.21	High	0	0.55	Huangbai	Dictamine
EXD-624	Oc1ccc(cc1)c1oc2c(CCC(O)(C)C)c(O)cc(c2c(=O)c1O)O	C20H20O7	372.37	High	0	0.55	Huangbai	Amurensin_qt
EXD-628	O=C1O[C@H](C(=C1)[C@@H]1OC(=O)[C@@H]2[C@]3([C@@]1(C)CC[C@H]1[C@@]3(C)C(=O)C[C@@H]3[C@]1(C)C=CC(=O)OC3(C)C)O2)O	C26H30O9	486.51	High	0	0.55	Huangbai	kihadanin A
EXD-631	O=c1c2ccccc2nc2n1CCc1c2[nH]c2c1cccc2	C18H13N3O	287.32	High	0	0.55	Huangbai	rutaecarpine
EXD-632	COc1ccc2c(c1OC)nc1c(c2OC)cco1	C14H13NO4	259.26	High	0	0.55	Huangbai	Skimmianin
EXD-633	COc1cccc2c1nc1occc1c2OC	C13H11NO3	229.23	High	0	0.55	Huangbai	Fagarine
EXD-634	COc1cc(/C=C/C(=C)O)ccc1O	C11H12O3	192.21	High	0	0.55	Huangbai	Ferulic Acid
EXD-635	COc1c(OC)ccc2c1ccc1c2ccc2c1cc1OCOc1c2	C21H16O4	332.35	High	0	0.55	Huangbai	Chelerythrine
EXD-636	CC1C2CC3OCOC3CC2CN2C1c1cc3OCOc3cc1CC2	C20H25NO4	343.42	High	0	0.55	Huangbai	Worenine
EXD-638	COc1cc2c(cc1OC)CCN1[C@@H]2[C@@H](C)c2c(C1)c1OCOc1cc2	C21H23NO4	353.41	High	0	0.55	Huangbai	Cavidine
EXD-642	O=C1C=C[C@]2([C@H](C(O1)(C)C)CC(=O)[C@@]1([C@@H]2CC[C@@]2([C@]31O[C@@H]3C(=O)O[C@H]2c1ccoc1)C)C)C	C26H30O7	454.51	High	0	0.55	Huangbai	Obacunone
EXD-644	COc1ccc2c(c1O)c[n+]1c(c2)c2cc3OCOc3cc2CC1	C19H16NO4	322.33	High	0	0.55	Huangbai	C19H16NO4(+)
EXD-645	COc1ccc2c(c1O)c1c(O)c(OC)cc3c1[C@H](C2)[N+](C)(C)CC3	C20H24NO4	342.41	High	0	0.55	Huangbai	C20H24NO4(+)
EXD-647	COc1cc2CC[n+]3c(c2cc1OC)cc1c(c3)c(OC)c(cc1)OC	C21H22NO4	352.4	High	0	0.55	Huangbai	C21H22NO4(+)
EXD-651	Cn1c(=O)c2C=CC(Oc2c2c1cccc2)(C)C	C15H15NO2	241.29	High	0	0.55	Huangbai	C15H15NO2
EXD-652	COc1c(OC)ccc2c1CN1CCc3c(C1C2)cc1c(c3)OCO1	C20H21NO4	339.39	High	0	0.55	Huangbai	C20H21NO4
EXD-653	COc1c(OC)ccc2c1CN1CCc3c(C1C2)cc(c(c3)O)OC	C20H23NO4	341.4	High	0	0.55	Huangbai	C20H23NO4
EXD-654	COc1cc2CCN3C(c2cc1OC)Cc1c(C3)c(OC)c(cc1)OC	C21H25NO4	355.43	High	0	0.55	Huangbai	C21H25NO4
EXD-655	Oc1ccc(cc1)CC[N+](C)(C)C	C11H18NO	180.27	High	0	0.55	Huangbai	C11H18NO(+)
EXD-660	COc1c(O)ccc2c1c[n+]1CCc3c(c1c2)cc1c(c3)OCO1	C19H16NO4	322.33	High	0	0.55	Huangbai	C19H16NO4(+)
EXD-663	COc1cc2CC[n+]3c(c2cc1O)cc1c(c3)c(OC)c(cc1)OC	C20H20NO4	338.38	High	0	0.55	Huangbai	C20H20NO4(+)
EXD-664	COc1cc2c(cc1O)CC[n+]1c2cc2ccc(c(c2c1)OC)OC	C20H20NO4	338.38	High	0	0.55	Huangbai	C20H20NO4(+)
EXD-665	COc1c(OCC(C(=C)C)O)ccc2c1nc1occc1c2OC	C18H19NO5	329.35	High	0	0.55	Huangbai	C18H19NO5
EXD-666	NC(=N)N	CH5N3	59.07	High	0	0.55	Huangbai	CH5N3
EXD-670	COc1cc2c(cc1O)C[C@@H]1N(C[C@H]2c2cc3OCOc3cc12)C	C19H19NO4	325.36	High	0	0.55	Huangbai	C19H19NO4
EXD-673	O=Cc1ccco1	C5H4O2	96.08	High	0	0.55	Zhimu	Furol
EXD-674	COc1cc(/C=C\C(=O)NCCc2ccc(cc2)O)ccc1O	C18H19NO4	313.35	High	0	0.55	Zhimu	(Z)-3-(4-hydroxy-3-methoxy-phenyl)-N-[2-(4-hydroxyphenyl)ethyl]acrylamide
EXD-676	O=C(/C=C\c1ccc(cc1)O)NCCc1ccc(cc1)O	C17H17NO3	283.32	High	0	0.55	Zhimu	coumaroyltyramine
EXD-677	CCCCCC=O	C6H12O	100.16	High	0	0.55	Zhimu	hexanal
EXD-678	CCCC/C=C/C=C/C=O	C9H14O	138.21	High	0	0.55	Zhimu	Nonadienal
EXD-679	CC(=O)OC[C@@H](NC(=O)[C@H](NC(=O)c1ccccc1)Cc1ccccc1)Cc1ccccc1	C27H28N2O4	444.52	High	0	0.55	Zhimu	asperglaucide
EXD-680	COC(=O)c1cc(O)c(c(c1)O)O	C8H8O5	184.15	High	0	0.55	Zhimu	Methylgallate
EXD-681	O=c1ccc2c(o1)cc1c(c2)C[C@H](O1)C(O)(C)C	C14H14O4	246.26	High	0	0.55	Zhimu	Marmesin
EXD-683	C=C1CC[C@@H]2O[C@@]2(CC[C@@H]2[C@@H]1CC2(C)C)C	C15H24O	220.35	High	0	0.55	Zhimu	(-)-Caryophyllene oxide
EXD-686	C=C[C@@H](c1ccc(cc1)O)/C=C/c1ccc(cc1)O	C17H16O2	252.31	High	0	0.55	Zhimu	Nyasol
EXD-695	C[C@H]1CC[C@@]2(OC1)O[C@@H]1[C@H]([C@@H]2C)[C@@]2([C@@H](C1)[C@@H]1CC=C3[C@]([C@@H]1CC2)(C)C[C@H]([C@@H](C3)O)O)C	C27H42O4	430.62	High	0	0.55	Zhimu	Anemarsaponin G_qt
EXD-700	CN1CCC2=C[C@@H]([C@@H]3[C@H]([C@H]12)c1cc2OCOc2cc1C(=O)O3)O	C17H17NO5	315.32	High	0	0.55	Zhimu	Hippeastrine
EXD-701	O[C@H]1CC[C@]2(C(=CC[C@@]3([C@H]2C[C@@H](OC(=O)c2cccnc2)[C@]2([C@]3(O)CC[C@@H]2C(=O)C)C)O)C1)C	C27H35NO6	469.57	High	0	0.55	Zhimu	12-O-Nicotinoylisolineolone
EXD-706	CN1CCC[C@@H]1c1cccnc1	C10H14N2	162.23	High	0	0.55	Zhimu	D-Nicotine
EXD-720	O[C@@H]1CC(=C)[C@H]2[C@@H]([C@@H]3[C@H]1[C@@H](C)C(=O)O3)C(=C)CC2	C15H20O3	248.32	High	0	0.55	Zhimu	Xuelianlacton e
EXD-745	COc1cc(O)c(c(c1)O)C(=O)c1ccc(cc1)O	C14H12O5	260.24	High	0	0.55	Zhimu	C14H12O5
EXD-751	NC(=O)c1cccnc1	C6H6N2O	122.12	High	0	0.55	Zhimu	C6H6N2O
EXD-001	COc1ccc(cc1)c1oc2c(CC=C(C)C)c(OC3OC(CO)C(C(C3O)O)O)cc(c2c(=O)c1OC1OC(C)C(C(C1OC1OCC(C(C1O)O)O)O)O)O	C38H48O19	808.78	Low	3	0.17
EXD-002	COc1ccc(cc1)c1oc2c(CC=C(C)C)c(OC3OC(CO)C(C(C3O)O)O)cc(c2c(=O)c1OC1OC(C)C(C(C1OC1OC(C)C(C(C1O)O)O)O)O)O	C39H50O19	822.8	Low	3	0.17
EXD-003	COc1ccc(cc1)c1oc2c(CC=C(C)C)c(OC3OC(CO)C(C(C3O)O)O)cc(c2c(=O)c1OC1OC(C)C(C(C1O)O)O)O	C33H40O15	676.66	Low	3	0.17
EXD-004	COc1ccc(cc1)c1oc2c(CCC(C)C)c(O)cc(c2c(=O)c1OC1OC(C)C(C(C1O)O)O)O	C27H32O10	516.54	Low	1	0.55
