# Supplementary material for: Uncovering Hidden Mechanisms of Different Prescriptions Treatment for Osteoporosis via Novel Bioinformatics Model and Experiment Validation
Source: Front Cell Dev Biol. 2022 Feb 8;10:831894. doi: 10.3389/fcell.2022.831894 (PMC8861325; doi:10.3389/fcell.2022.831894)
Supplement: Supplementary file 3 [file Table1.xlsx]

## Sheet: GSK
Molecule	Canonical SMILES	Formula	MW	#Heavy atoms	#Aromatic heavy atoms	Fraction Csp3	#Rotatable bonds	#H-bond acceptors	#H-bond donors	MR	TPSA	iLOGP	XLOGP3	WLOGP	MLOGP	Silicos-IT Log P	Consensus Log P	ESOL Log S	ESOL Solubility (mg/ml)	ESOL Solubility (mol/l)	ESOL Class	Ali Log S	Ali Solubility (mg/ml)	Ali Solubility (mol/l)	Ali Class	Silicos-IT LogSw	Silicos-IT Solubility (mg/ml)	Silicos-IT Solubility (mol/l)	Silicos-IT class	GI absorption	BBB permeant	Pgp substrate	CYP1A2 inhibitor	CYP2C19 inhibitor	CYP2C9 inhibitor	CYP2D6 inhibitor	CYP3A4 inhibitor	log Kp (cm/s)	Lipinski #violations	Ghose #violations	Veber #violations	Egan #violations	Muegge #violations	Bioavailability Score	PAINS #alerts	Brenk #alerts	Leadlikeness #violations	Synthetic Accessibility
GSK-1	Oc1cc(O)c2c(c1)oc(cc2=O)c1ccc(c(c1)O)O	C15H10O6	286.24	21	16	0	1	6	4	76.01	111.13	1.86	2.53	2.28	-0.03	2.03	1.73	-3.71	0.0563	0.000197	Soluble	-4.51	0.00884	3.09e-05	Moderately soluble	-3.82	0.0429	0.00015	Soluble	High	No	No	Yes	No	No	Yes	Yes	-6.25	0	0	0	0	0	0.55	1	1	0	3.02
GSK-2	Oc1ccc(cc1)c1cc(=O)c2c(o1)cc(cc2O)O	C15H10O5	270.24	20	16	0	1	5	3	73.99	90.9	1.89	3.02	2.58	0.52	2.52	2.11	-3.94	0.0307	0.000114	Soluble	-4.59	0.00688	2.55e-05	Moderately soluble	-4.4	0.0107	3.94e-05	Moderately soluble	High	No	No	Yes	No	No	Yes	Yes	-5.8	0	0	0	0	0	0.55	0	0	0	2.96
GSK-3	Oc1cc(O)c2c(c1)oc(c(c2=O)O)c1ccc(c(c1)O)O	C15H10O7	302.24	22	16	0	1	7	5	78.03	131.36	1.63	1.54	1.99	-0.56	1.54	1.23	-3.16	0.211	0.000698	Soluble	-3.91	0.0374	0.000124	Soluble	-3.24	0.173	0.000573	Soluble	High	No	No	Yes	No	No	Yes	Yes	-7.05	0	0	0	0	0	0.55	1	1	0	3.23
GSK-4	CC1=CC[C@H](CC1)C(O)(C)C	C10H18O	154.25	11	0	0.8	1	1	1	48.8	20.23	2.09	3.39	2.5	2.3	2.17	2.49	-2.87	0.21	0.00136	Soluble	-3.49	0.0495	0.000321	Soluble	-1.69	3.17	0.0206	Soluble	High	Yes	No	No	No	No	No	No	-4.83	0	1	0	0	2	0.55	0	1	1	3.24
GSK-5	CCCCCCC/C=C/C=O	C10H18O	154.25	11	0	0.7	7	1	0	49.91	17.07	2.67	3.69	3.1	2.59	3.14	3.04	-2.66	0.338	0.00219	Soluble	-3.74	0.0281	0.000182	Soluble	-2.72	0.295	0.00191	Soluble	High	Yes	No	No	No	No	No	No	-4.62	0	1	0	0	2	0.55	0	2	2	2.4
GSK-6	O=C1C[C@@H]2C([C@@]1(C)CC2)(C)C	C10H16O	152.23	11	0	0.9	0	1	0	45.64	17.07	2.12	2.19	2.4	2.3	2.85	2.37	-2.16	1.04	0.00686	Soluble	-2.18	1	0.00657	Soluble	-2.6	0.383	0.00252	Soluble	High	Yes	No	No	No	No	No	No	-5.67	0	1	0	0	2	0.55	0	0	1	3.22
GSK-7	C=C[C@@](CCC=C(C)C)(O)C	C10H18O	154.25	11	0	0.6	4	1	1	50.44	20.23	2.71	2.97	2.67	2.59	2.35	2.66	-2.4	0.609	0.00395	Soluble	-3.06	0.135	0.000875	Soluble	-1.84	2.2	0.0143	Soluble	High	Yes	No	No	No	No	No	No	-5.13	0	1	0	0	2	0.55	0	1	1	2.74
GSK-8	C/C=C\c1ccc2c(c1)OCO2	C10H10O2	162.19	12	6	0.2	1	2	0	47.4	18.46	2.54	3.65	2.34	2.02	2.84	2.68	-3.45	0.0577	0.000356	Soluble	-3.73	0.0304	0.000188	Soluble	-2.62	0.392	0.00242	Soluble	High	Yes	No	Yes	No	No	No	No	-4.7	0	0	0	0	1	0.55	0	0	2	2.3
GSK-9	CC1=CC(=O)[C@H](CC1)C(C)C	C10H16O	152.23	11	0	0.7	1	1	0	47.8	17.07	2.33	2.85	2.57	2.2	2.63	2.51	-2.51	0.467	0.00307	Soluble	-2.87	0.207	0.00136	Soluble	-2.15	1.08	0.0071	Soluble	High	Yes	No	No	No	No	No	No	-5.21	0	1	0	0	2	0.55	0	0	1	3.2
GSK-10	C=CCc1ccc(c(c1)OC)OC	C11H14O2	178.23	13	6	0.27	4	2	0	53.53	18.46	2.65	2.52	2.43	2.3	3	2.58	-2.61	0.437	0.00245	Soluble	-2.55	0.498	0.00279	Soluble	-3.5	0.0562	0.000316	Soluble	High	Yes	No	Yes	No	No	No	No	-5.6	0	0	0	0	1	0.55	0	1	1	1.71
GSK-11	O[C@H]1C[C@@H]2C([C@@]1(C)CC2)(C)C	C10H18O	154.25	11	0	1	0	1	1	46.6	20.23	2.33	2.72	2.19	2.45	2.27	2.39	-2.51	0.477	0.00309	Soluble	-2.8	0.245	0.00159	Soluble	-1.91	1.92	0.0124	Soluble	High	Yes	No	No	No	No	No	No	-5.31	0	1	0	0	2	0.55	0	0	1	3.43
GSK-12	O[C@H]1CC[C@]2([C@H](C1(C)C)CC[C@@]1([C@@H]2CC=C2[C@@]1(C)CC[C@@]1([C@H]2CC(C)(C)CC1)C(=O)O)C)C	C30H48O3	456.7	33	0	0.9	1	3	2	136.65	57.53	3.94	7.49	7.23	5.82	5.85	6.07	-7.32	2.16e-05	4.74e-08	Poorly soluble	-8.53	1.34e-06	2.94e-09	Poorly soluble	-6.12	0.000345	7.55e-07	Poorly soluble	Low	No	No	No	No	No	No	No	-3.77	1	3	0	1	1	0.85	0	1	2	6.08
GSK-13	CCCCCCCCCCCC(=O)O	C12H24O2	200.32	14	0	0.92	10	2	1	61.57	37.3	2.7	4.2	3.99	3.15	3.5	3.51	-3.07	0.171	0.000855	Soluble	-4.69	0.00406	2.03e-05	Moderately soluble	-3.69	0.0405	0.000202	Soluble	High	Yes	No	No	No	No	No	No	-4.54	0	0	0	0	0	0.85	0	0	3	1.87
GSK-14	C/C=C/c1cc(OC)c2c(c1)[C@@H](C)[C@@H](O2)c1ccc(c(c1)OC)OC	C21H24O4	340.41	25	12	0.33	5	4	0	99.45	36.92	4.05	4.71	4.55	2.95	4.91	4.23	-4.94	0.00388	1.14e-05	Moderately soluble	-5.21	0.00208	6.11e-06	Moderately soluble	-5.96	0.000374	1.1e-06	Moderately soluble	High	Yes	No	No	Yes	Yes	Yes	Yes	-5.03	0	0	0	0	0	0.55	0	0	1	4.05
GSK-15	CC[C@@H](C(C)C)CC[C@H]([C@H]1CC[C@@H]2[C@]1(C)CC[C@H]1[C@H]2CC=C2[C@]1(C)CC[C@@H](C2)O[C@@H]1O[C@H](CO)[C@H]([C@@H]([C@H]1O)O)O)C	C35H60O6	576.85	41	0	0.94	9	6	4	165.61	99.38	5.17	7.74	5.85	3.96	5.02	5.55	-7.7	1.15e-05	2e-08	Poorly soluble	-9.67	1.23e-07	2.14e-10	Poorly soluble	-4.4	0.0228	3.94e-05	Moderately soluble	Low	No	No	No	No	No	No	No	-4.32	1	4	0	0	1	0.55	0	1	3	8.02
GSK-16	CC[C@@H](C(C)C)CC[C@H]([C@H]1CC[C@@H]2[C@]1(C)CC[C@H]1[C@H]2CC=C2[C@]1(C)CC[C@H](C2)O)C	C29H50O	414.71	30	0	0.93	6	1	1	133.23	20.23	5.03	9.34	8.02	6.73	7.04	7.23	-7.9	5.23e-06	1.26e-08	Poorly soluble	-9.67	8.9e-08	2.15e-10	Poorly soluble	-6.19	0.000269	6.49e-07	Poorly soluble	Low	No	No	No	No	No	No	No	-2.2	1	3	0	1	2	0.55	0	1	2	6.3
GSK-17	CCCCCCCCCCCCCCCCCCCCCC(=O)O	C22H44O2	340.58	24	0	0.95	20	2	1	109.64	37.3	5.26	10.37	7.89	5.58	7.89	7.4	-7.16	2.33e-05	6.84e-08	Poorly soluble	-11.1	2.73e-09	8.03e-12	Insoluble	-7.7	6.75e-06	1.98e-08	Poorly soluble	Low	No	No	Yes	No	No	No	No	-1.01	1	1	1	1	2	0.85	0	0	2	3
GSK-18	Oc1ccc(cc1)c1oc2cc(O)cc(c2c(=O)c1O)O	C15H10O6	286.24	21	16	0	1	6	4	76.01	111.13	1.7	1.9	2.28	-0.03	2.03	1.58	-3.31	0.14	0.00049	Soluble	-3.86	0.0398	0.000139	Soluble	-3.82	0.0429	0.00015	Soluble	High	No	No	Yes	No	No	Yes	Yes	-6.7	0	0	0	0	0	0.55	0	0	0	3.14
GSK-19	OC[C@H]1O[C@@H](Oc2c(oc3c(c2=O)c(O)cc(c3)O)c2ccc(c(c2)O)O)[C@@H]([C@H]([C@@H]1O)O)O	C21H20O12	464.38	33	16	0.29	4	12	8	110.16	210.51	0.94	0.36	-0.54	-2.59	-0.59	-0.48	-3.04	0.423	0.00091	Soluble	-4.35	0.021	4.51e-05	Moderately soluble	-1.51	14.3	0.0308	Soluble	Low	No	No	No	No	No	No	No	-8.88	2	1	1	1	3	0.17	1	1	1	5.32
GSK-20	Cc1cc(O)c2c(c1)C(=O)c1c(C2=O)c(O)cc(c1)O	C15H10O5	270.24	20	12	0.07	0	5	3	70.78	94.83	1.81	2.72	1.89	0.36	2.55	1.87	-3.67	0.0574	0.000212	Soluble	-4.37	0.0117	4.31e-05	Moderately soluble	-3.91	0.0336	0.000124	Soluble	High	No	No	Yes	No	No	No	Yes	-6.02	0	0	0	0	0	0.55	1	0	0	2.57
GSK-21	CC1=CC=CC(CC1=O)(C)C	C10H14O	150.22	11	0	0.5	0	1	0	47.06	17.07	2.2	2.58	2.49	2.1	2.45	2.36	-2.4	0.603	0.00401	Soluble	-2.59	0.389	0.00259	Soluble	-2.13	1.12	0.00743	Soluble	High	Yes	No	No	No	No	No	No	-5.38	0	1	0	0	2	0.55	0	0	1	3.14
GSK-22	OC[C@H]1O[C@@H](Oc2c(oc3c(c2=O)c(O)cc(c3)O)c2ccc(cc2)O)[C@@H]([C@H]([C@@H]1O)O)O	C21H20O11	448.38	32	16	0.29	4	11	7	108.13	190.28	1.29	0.72	-0.24	-2.1	-0.12	-0.09	-3.18	0.297	0.000661	Soluble	-4.29	0.0228	5.08e-05	Moderately soluble	-2.1	3.55	0.00791	Soluble	Low	No	No	No	No	No	No	No	-8.52	2	0	1	1	3	0.17	0	0	1	5.29
GSK-23	O=C1O[C@H]2[C@H](C1=C)CC[C@@]([C@H]1[C@@H]2[C@](C)(O)CC1)(C)O	C15H22O4	266.33	19	0	0.8	0	4	2	71.09	66.76	2.32	1.23	1.41	1.71	1.84	1.7	-2.27	1.44	0.00542	Soluble	-2.23	1.57	0.00589	Soluble	-1.9	3.32	0.0125	Soluble	High	Yes	No	No	No	No	No	No	-7.05	0	0	0	0	0	0.55	0	1	0	4.34
GSK-24	CCCCCCO	C6H14O	102.17	7	0	1	4	1	1	32.12	20.23	2.03	2.03	1.56	1.53	1.28	1.69	-1.49	3.32	0.0325	Very soluble	-2.08	0.845	0.00827	Soluble	-1.64	2.34	0.0229	Soluble	High	Yes	No	No	No	No	No	No	-5.48	0	2	0	0	2	0.55	0	0	1	1.07
GSK-25	C[C@H]1CC[C@@]2([C@@]3([C@H]1C[C@H](C2(C)C)CC3)C)O	C15H26O	222.37	16	0	1	0	1	1	68.56	20.23	2.96	4.05	3.61	3.81	3.4	3.57	-3.77	0.0377	0.00017	Soluble	-4.18	0.0147	6.63e-05	Moderately soluble	-3.18	0.146	0.000655	Soluble	High	Yes	No	No	No	Yes	No	No	-4.78	0	0	0	0	1	0.55	0	0	2	3.73
GSK-26	COc1cc2C[C@@](O)(CO)[C@@H]([C@H](c2cc1O)c1ccc(c(c1)OC)O)CO	C20H24O7	376.4	27	12	0.4	5	7	5	98.53	119.61	2.47	1.54	1.13	0.37	2.04	1.51	-3.14	0.271	0.00072	Soluble	-3.66	0.0821	0.000218	Soluble	-3.68	0.0781	0.000207	Soluble	High	No	Yes	No	No	No	No	No	-7.5	0	0	0	0	0	0.55	0	0	1	4.08
GSK-27	O[C@H]1CC[C@]2(C(=CC[C@@H]3[C@@H]2CC[C@]2([C@H]3CC[C@@H]2[C@@H](CC[C@@H](C(C)C)C)C)C)C1)C	C28H48O	400.68	29	0	0.93	5	1	1	128.42	20.23	4.83	8.8	7.63	6.54	6.63	6.89	-7.54	1.16e-05	2.9e-08	Poorly soluble	-9.11	3.13e-07	7.8e-10	Poorly soluble	-5.79	0.000642	1.6e-06	Moderately soluble	Low	No	No	No	No	No	No	No	-2.5	1	2	0	1	2	0.55	0	1	2	6.17
GSK-28	C[C@H]1CC=C[C@H](C)CC[C@H](CC1)C(C)C	C15H28	208.38	15	0	0.87	1	0	0	71.63	0	3.46	6.26	5.05	5.65	3.75	4.83	-5.01	0.00204	9.78e-06	Moderately soluble	-6.05	0.000187	8.97e-07	Poorly soluble	-3.11	0.163	0.000782	Soluble	Low	No	No	No	Yes	Yes	No	No	-3.13	1	0	0	0	2	0.55	0	1	2	4.44
GSK-29	CC([C@@H]1CC[C@]2([C@H]3[C@@H]1[C@@H]2C(=CC3)C)C)C	C15H24	204.35	15	0	0.87	1	0	0	67.14	0	3.39	4.47	4.27	5.65	3.73	4.3	-3.86	0.0284	0.000139	Soluble	-4.19	0.0132	6.46e-05	Moderately soluble	-3.07	0.174	0.000851	Soluble	Low	Yes	No	Yes	Yes	Yes	No	No	-4.37	1	0	0	0	1	0.55	0	1	2	4.62
GSK-30	CCCCCCCCCC(=O)O	C10H20O2	172.26	12	0	0.9	8	2	1	51.96	37.3	2.5	4.09	3.21	2.58	2.63	3	-2.96	0.19	0.0011	Soluble	-4.58	0.00454	2.64e-05	Moderately soluble	-2.87	0.23	0.00134	Soluble	High	Yes	No	No	No	No	No	No	-4.45	0	0	0	0	1	0.85	0	0	3	1.67
GSK-31	CCCCC/C=C/C/C=C/CCCCCCCCOC(=O)C	C20H36O2	308.5	22	0	0.75	16	2	0	98.59	26.3	4.55	7.21	6.36	4.93	6.8	5.97	-5.24	0.00178	5.77e-06	Moderately soluble	-7.59	8.02e-06	2.6e-08	Poorly soluble	-5.77	0.000523	1.69e-06	Moderately soluble	High	No	No	Yes	No	Yes	No	No	-3.06	1	1	1	1	2	0.55	0	1	2	3.29
GSK-32	CC(=O)/C=C/[C@@H]1C(=CCCC1(C)C)C	C13H20O	192.3	14	0	0.62	2	1	0	61.48	17.07	2.81	3.85	3.51	2.94	3.41	3.31	-3.33	0.0908	0.000472	Soluble	-3.9	0.0239	0.000125	Soluble	-2.65	0.433	0.00225	Soluble	High	Yes	No	No	No	Yes	No	No	-4.74	0	0	0	0	2	0.55	0	2	2	3.53
GSK-33	CC[C@H](C(C)C)CC[C@H]([C@H]1CC[C@@H]2[C@]1(C)CC[C@H]1[C@H]2CC=C2[C@]1(C)CC[C@@H](C2)O)C	C29H50O	414.71	30	0	0.93	6	1	1	133.23	20.23	5.07	9.34	8.02	6.73	7.04	7.24	-7.9	5.23e-06	1.26e-08	Poorly soluble	-9.67	8.9e-08	2.15e-10	Poorly soluble	-6.19	0.000269	6.49e-07	Poorly soluble	Low	No	No	No	No	No	No	No	-2.2	1	3	0	1	2	0.55	0	1	2	6.3
GSK-34	Oc1ccc(cc1)/C=C/C(=O)c1ccc(cc1O)O	C15H12O4	256.25	19	12	0	3	4	3	72.32	77.76	2.02	3.18	2.59	1.58	2.48	2.37	-3.7	0.0509	0.000199	Soluble	-4.48	0.00841	3.28e-05	Moderately soluble	-3.23	0.15	0.000586	Soluble	High	Yes	No	Yes	No	Yes	No	Yes	-5.61	0	0	0	0	0	0.55	0	1	0	2.52
GSK-35	Oc1ccc(cc1)[C@@H]1CC(=O)c2c(O1)cc(cc2)O	C15H12O4	256.25	19	12	0.13	1	4	2	69.55	66.76	1.73	2.3	2.48	1.27	2.55	2.07	-3.28	0.135	0.000526	Soluble	-3.34	0.117	0.000457	Soluble	-4	0.0258	0.000101	Soluble	High	Yes	Yes	Yes	No	No	No	No	-6.23	0	0	0	0	0	0.55	0	0	0	2.95
GSK-36	C[C@@H]1CCC(=C(C)C)C(=O)C1	C10H16O	152.23	11	0	0.7	0	1	0	47.8	17.07	2.32	3.08	2.71	2.2	2.76	2.61	-2.72	0.287	0.00189	Soluble	-3.11	0.119	0.000784	Soluble	-2.38	0.635	0.00417	Soluble	High	Yes	No	No	No	No	No	No	-5.04	0	1	0	0	2	0.55	0	1	1	2.75
GSK-37	O=C1[C@@]2(C)CC[C@@H](C1(C)C)C2	C10H16O	152.23	11	0	0.9	0	1	0	45.64	17.07	2.21	3.52	2.4	2.3	2.85	2.66	-3	0.152	0.000997	Soluble	-3.56	0.0417	0.000274	Soluble	-2.6	0.383	0.00252	Soluble	High	Yes	No	No	No	No	No	No	-4.73	0	1	0	0	2	0.55	0	0	2	3.22
GSK-38	COc1cc(cc(c1O)OC)c1cc(=O)c2c(o1)cc(cc2O)O	C17H14O7	330.29	24	16	0.12	3	7	3	86.97	109.36	2.58	3.07	2.59	-0.07	2.59	2.15	-4.12	0.0252	7.63e-05	Moderately soluble	-5.03	0.00306	9.26e-06	Moderately soluble	-4.63	0.00771	2.33e-05	Moderately soluble	High	No	No	Yes	No	Yes	Yes	Yes	-6.14	0	0	0	0	0	0.55	0	0	0	3.21
GSK-39	CC([C@@H]1CC[C@H]([C@]23[C@H]1[C@H]2C(=CC3)C)C)C	C15H24	204.35	15	0	0.87	1	0	0	67.14	0	3.4	4.47	4.27	5.65	3.73	4.3	-3.86	0.0284	0.000139	Soluble	-4.19	0.0132	6.46e-05	Moderately soluble	-3.07	0.174	0.000851	Soluble	Low	Yes	No	Yes	Yes	Yes	No	No	-4.37	1	0	0	0	1	0.55	0	1	2	5.31
GSK-40	CCCCCCCCCCCCCCCC(=O)OCC1=C[C@H]2[C@H]3[C@H](C3(C)C)C[C@H]([C@]3([C@@]([C@@H]1O)(O)[C@@H](O)C(=C3)C)C2=O)C	C36H58O6	586.84	42	0	0.83	17	6	3	170.25	104.06	6.17	7.56	6.85	4.25	7.69	6.5	-7.12	4.46e-05	7.6e-08	Poorly soluble	-9.58	1.54e-07	2.62e-10	Poorly soluble	-7.7	1.18e-05	2e-08	Poorly soluble	Low	No	Yes	No	No	No	No	Yes	-4.51	2	4	1	1	2	0.17	0	1	3	7.93
GSK-41	COc1ccc(cc1)CC=C	C10H12O	148.2	11	6	0.2	3	1	0	47.04	9.23	2.47	3.37	2.42	2.67	2.96	2.78	-3.09	0.121	0.000817	Soluble	-3.24	0.0849	0.000573	Soluble	-3.35	0.0654	0.000442	Soluble	High	Yes	No	Yes	No	No	No	No	-4.81	0	1	0	0	2	0.55	0	1	1	1.28
GSK-42	COc1ccc(cc1c1c(O)cc(c2c1oc(cc2=O)c1ccc(cc1)O)O)c1cc(=O)c2c(o1)cc(cc2O)OC	C32H22O10	566.51	42	32	0.06	5	10	4	155.91	159.8	3.94	5.69	5.74	0.63	5.72	4.34	-7.17	3.82e-05	6.75e-08	Poorly soluble	-8.81	8.74e-07	1.54e-09	Poorly soluble	-10.07	4.78e-08	8.43e-11	Insoluble	Low	No	No	No	No	Yes	No	No	-5.72	1	3	1	1	2	0.55	0	0	2	4.5
GSK-43	COc1ccc(cc1)c1cc(=O)c2c(o1)c(c(cc2O)O)c1cc(ccc1OC)c1cc(=O)c2c(o1)cc(cc2O)O	C32H22O10	566.51	42	32	0.06	5	10	4	155.91	159.8	4.17	5.69	5.74	0.63	5.72	4.39	-7.17	3.82e-05	6.75e-08	Poorly soluble	-8.81	8.74e-07	1.54e-09	Poorly soluble	-10.07	4.78e-08	8.43e-11	Insoluble	Low	No	No	No	No	Yes	No	No	-5.72	1	3	1	1	2	0.55	0	0	2	4.47
GSK-44	COc1c(OC)cc(cc1OC)C	C10H14O3	182.22	13	6	0.4	3	3	0	50.88	27.69	2.56	1.82	2.02	1.49	2.31	2.04	-2.26	1	0.0055	Soluble	-2.02	1.73	0.00952	Soluble	-3.17	0.124	0.000681	Soluble	High	Yes	No	Yes	No	No	No	No	-6.12	0	0	0	0	1	0.55	0	0	1	1.48
GSK-45	C=C1[C@@H]2CC[C@@H]3[C@@]1(C)CCCC([C@@H]23)(C)C	C15H24	204.35	15	0	0.87	0	0	0	66.88	0	3.14	5.08	4.42	5.65	4.19	4.5	-4.31	0.0101	4.93e-05	Moderately soluble	-4.82	0.00307	1.5e-05	Moderately soluble	-3.77	0.0349	0.000171	Soluble	Low	No	No	No	Yes	Yes	No	No	-3.94	1	0	0	0	2	0.55	0	1	2	3.6
GSK-46	COc1ccc2c(c1O)c1c(O)c(OC)cc3c1[C@H](C2)[N](C)(C)CC3	C20H24NO4	342.41	25	12	0.4	2	4	2	101.87	62.16	-0.7	2.74	2.33	1.98	3.01	1.87	-3.91	0.0419	0.000122	Soluble	-3.7	0.0683	0.0002	Soluble	-5.69	0.000704	2.06e-06	Moderately soluble	High	Yes	Yes	No	No	No	Yes	Yes	-6.44	0	0	0	0	0	0.55	0	0	0	3.78
GSK-47	OC[C@@H]1O[C@@H](OCCc2ccc(cc2)O)[C@H]([C@@H]([C@@H]1O)O)O	C14H20O7	300.3	21	6	0.57	5	7	5	71.78	119.61	1.69	-1.05	-1.25	-1.22	-0.48	-0.46	-0.92	36	0.12	Very soluble	-0.97	31.9	0.106	Very soluble	-0.44	108	0.361	Soluble	High	No	No	Yes	No	No	No	No	-8.88	0	1	0	0	0	0.55	0	0	0	4.26
GSK-48	OCCc1ccc(cc1)O	C8H10O2	138.16	10	6	0.25	2	2	2	39.4	40.46	1.4	0.43	0.93	1.21	1.52	1.1	-1.28	7.26	0.0525	Very soluble	-0.85	19.6	0.142	Very soluble	-2.03	1.3	0.0094	Soluble	High	Yes	No	No	No	No	No	No	-6.84	0	2	0	0	1	0.55	0	0	1	1
GSK-49	CCCCCCCCCCCCCCCCCCC[C@@H](CCCCCCCCC)O	C29H60O	424.79	30	0	1	26	1	1	142.68	20.23	7.47	14.03	10.53	7.27	11.23	10.11	-9.6	1.08e-07	2.53e-10	Poorly soluble	-14.53	1.24e-12	2.92e-15	Insoluble	-10.55	1.19e-08	2.81e-11	Insoluble	Low	No	Yes	No	No	No	No	No	1.07	1	3	1	1	3	0.55	0	0	3	4.29
GSK-50	COc1cc(ccc1O)c1cc(=O)c2c(o1)cc(cc2O)O	C16H12O6	300.26	22	16	0.06	2	6	3	80.48	100.13	2.44	3.1	2.59	0.22	2.55	2.18	-4.06	0.0261	8.69e-05	Moderately soluble	-4.87	0.00404	1.35e-05	Moderately soluble	-4.52	0.00907	3.02e-05	Moderately soluble	High	No	No	Yes	No	Yes	Yes	Yes	-5.93	0	0	0	0	0	0.55	0	0	0	3.06
GSK-51	COc1ccc(cc1)c1cc(=O)c2c(o1)cc(cc2O)OC	C17H14O5	298.29	22	16	0.12	3	5	1	82.93	68.9	2.55	3.67	3.18	1.01	3.55	2.79	-4.34	0.0136	4.55e-05	Moderately soluble	-4.81	0.00466	1.56e-05	Moderately soluble	-5.8	0.000474	1.59e-06	Moderately soluble	High	Yes	No	Yes	Yes	Yes	Yes	Yes	-5.51	0	0	0	0	0	0.55	0	0	1	3.14
GSK-52	O=c1ccoc(c1O)C	C6H6O3	126.11	9	6	0.17	0	3	1	31.97	50.44	1.47	0.09	0.65	-0.84	1.36	0.55	-1.17	8.49	0.0673	Very soluble	-0.7	24.9	0.198	Very soluble	-1.71	2.48	0.0197	Soluble	High	Yes	No	No	No	No	No	No	-7.01	0	3	0	0	1	0.55	0	0	1	2.39
GSK-53	C/C=C\C(=O)C1=C(C)C=CCC1(C)C	C13H18O	190.28	14	0	0.46	2	1	0	61.01	17.07	2.74	3.18	3.43	2.85	3.4	3.12	-2.89	0.244	0.00128	Soluble	-3.21	0.117	0.000617	Soluble	-2.63	0.448	0.00236	Soluble	High	Yes	No	Yes	No	No	No	No	-5.2	0	0	0	0	2	0.55	0	1	1	3.64
GSK-54	CC(=CCc1c(O)cc(c2c1oc(c1ccc(cc1)O)c(c2=O)O)O)C	C20H18O6	354.35	26	16	0.15	3	6	4	99.73	111.13	2.88	4.45	3.79	1.09	3.73	3.19	-5.1	0.00283	7.98e-06	Moderately soluble	-6.5	0.000111	3.14e-07	Poorly soluble	-5.05	0.00312	8.81e-06	Moderately soluble	High	No	No	Yes	No	Yes	Yes	No	-5.3	0	0	0	0	0	0.55	0	1	2	3.73
GSK-55	C/C=C/c1cc(OC)c(cc1OC)OC	C12H16O3	208.25	15	6	0.33	4	3	0	60.82	27.69	3.02	3	2.64	1.97	2.89	2.7	-3.05	0.184	0.000885	Soluble	-3.25	0.118	0.000568	Soluble	-3.26	0.113	0.000545	Soluble	High	Yes	No	Yes	Yes	No	No	No	-5.44	0	0	0	0	0	0.55	0	0	1	2.39
GSK-56	CCCCCCCCCCCCC/C=C\CC	C17H34	238.45	17	0	0.88	13	0	0	83.36	0	4.77	8.49	6.65	6.54	6.47	6.58	-5.81	0.00037	1.55e-06	Moderately soluble	-8.36	1.04e-06	4.35e-09	Poorly soluble	-6.01	0.000231	9.71e-07	Poorly soluble	Low	No	No	Yes	No	No	No	No	-1.73	1	1	1	1	2	0.55	0	1	3	3.38
GSK-57	COc1cc(OC)cc(c1)C	C9H12O2	152.19	11	6	0.33	2	2	0	44.39	18.46	2.44	2.23	2.01	1.8	2.29	2.15	-2.46	0.528	0.00347	Soluble	-2.25	0.85	0.00559	Soluble	-3.02	0.144	0.000948	Soluble	High	Yes	No	Yes	No	No	No	No	-5.65	0	1	0	0	1	0.55	0	0	1	1.13
GSK-58	C[C@@H]1CC[C@@H]([C@@H](C1)O)C(C)C	C10H20O	156.27	11	0	1	1	1	1	49.23	20.23	2.62	3.4	2.44	2.45	2.06	2.59	-2.88	0.204	0.0013	Soluble	-3.5	0.0489	0.000313	Soluble	-1.48	5.22	0.0334	Soluble	High	Yes	No	No	No	No	No	No	-4.84	0	1	0	0	2	0.55	0	0	1	2.63
GSK-59	CCCCCCCCOC=O	C9H18O2	158.24	11	0	0.89	8	2	0	47.05	26.3	2.72	3.55	2.52	2.28	2.5	2.71	-2.53	0.467	0.00295	Soluble	-3.79	0.0258	0.000163	Soluble	-2.78	0.264	0.00167	Soluble	High	Yes	No	No	No	No	No	No	-4.74	0	1	0	0	1	0.55	0	1	3	1.52
GSK-60	COc1cc(ccc1O)C[C@]1(O)CO[C@@H]([C@H]1CO)c1ccc(c(c1)OC)O	C20H24O7	376.4	27	12	0.4	6	7	4	98.29	108.61	2.77	1.89	1.44	0.37	2.37	1.77	-3.3	0.19	0.000504	Soluble	-3.79	0.0606	0.000161	Soluble	-4	0.0378	0.0001	Soluble	High	No	Yes	No	No	No	Yes	No	-7.25	0	0	0	0	0	0.55	0	0	1	4.07
GSK-61	OC[C@H]1O[C@@H](Oc2c(oc3c(c2=O)c(O)cc(c3)O)c2ccc(c(c2)O)O)[C@@H]([C@H]([C@H]1O)O)O	C21H20O12	464.38	33	16	0.29	4	12	8	110.16	210.51	1.45	0.36	-0.54	-2.59	-0.59	-0.38	-3.04	0.423	0.00091	Soluble	-4.35	0.021	4.51e-05	Moderately soluble	-1.51	14.3	0.0308	Soluble	Low	No	No	No	No	No	No	No	-8.88	2	1	1	1	3	0.17	1	1	1	5.32
GSK-62	Oc1cc(O)c2c(c1)oc(c(c2=O)O[C@H]1O[C@H](C)[C@H]([C@@H]([C@@H]1O)O)O)c1ccc(c(c1)O)O	C21H20O11	448.38	32	16	0.29	3	11	7	109	190.28	1.76	0.86	0.49	-1.84	0.01	0.26	-3.33	0.208	0.000464	Soluble	-4.44	0.0163	3.63e-05	Moderately soluble	-2.08	3.69	0.00822	Soluble	Low	No	No	No	No	No	No	No	-8.42	2	0	1	1	3	0.17	1	1	1	5.28
GSK-63	Oc1ccc2c(c1)oc(c(c2=O)O)c1cc(O)c(c(c1)O)O	C15H10O7	302.24	22	16	0	1	7	5	78.04	131.36	1	1.61	1.99	-0.56	1.54	1.12	-3.2	0.191	0.00063	Soluble	-3.98	0.0316	0.000105	Soluble	-3.24	0.173	0.000573	Soluble	High	No	No	Yes	No	No	Yes	Yes	-7	0	0	0	0	0	0.55	1	1	0	3.21
GSK-64	OC[C@@H]1O[C@H](Oc2c(oc3c(c2=O)c(O)cc(c3CC=C(C)C)O[C@@H]2O[C@H](CO)[C@H]([C@@H]([C@H]2O)O)O)c2ccc(cc2)O)[C@@H]([C@@H]([C@H]1O[C@@H]1O[C@H](C)[C@H]([C@@H]([C@H]1O)O)O)O)O	C38H48O20	824.78	58	16	0.55	11	20	12	195.2	328.35	3.36	-0.81	-2.41	-4.67	-1.87	-1.28	-3.92	0.0988	0.00012	Soluble	-5.61	0.00204	2.48e-06	Moderately soluble	-0.2	514	0.624	Soluble	Low	No	Yes	No	No	No	No	No	-11.91	3	4	2	1	4	0.17	0	1	2	8.26
GSK-65	OC[C@H]1O[C@@H](O[C@@H]2[C@@H](O[C@@H]([C@@H]([C@H]2O)O)C)Oc2c(oc3c(c2=O)c(O)cc(c3CC=C(C)C)O)c2ccc(cc2)OC)[C@@H]([C@@H]([C@@H]1O)O)O	C33H40O15	676.66	48	16	0.48	9	15	8	167.54	238.2	3.08	1.87	0.42	-2.35	0.77	0.76	-4.87	0.00921	1.36e-05	Moderately soluble	-6.49	0.000217	3.21e-07	Poorly soluble	-2.74	1.23	0.00181	Soluble	Low	No	Yes	No	No	No	No	No	-9.1	3	3	1	1	4	0.17	0	1	2	7.21
GSK-66	COc1ccc(cc1)c1oc2c(CC=C(C)C)c(O)cc(c2c(=O)c1O)O	C21H20O6	368.38	27	16	0.19	4	6	3	104.2	100.13	3.26	4.77	4.09	1.31	4.28	3.54	-5.3	0.00183	4.97e-06	Moderately soluble	-6.6	9.17e-05	2.49e-07	Poorly soluble	-5.75	0.000658	1.79e-06	Moderately soluble	High	No	No	No	No	Yes	No	No	-5.16	0	0	0	0	0	0.55	0	1	2	3.79
GSK-67	COc1ccc(cc1)c1oc2c(CC=C(C)C)c(O)cc(c2c(=O)c1O[C@@H]1O[C@H](C)[C@@H]([C@H]([C@@H]1O[C@@H]1OC[C@H]([C@H]([C@H]1O)O)O)O)O)O	C32H38O14	646.64	46	16	0.47	8	14	7	161.58	217.97	5.35	1.94	1.06	-1.8	1.23	1.56	-4.8	0.0102	1.58e-05	Moderately soluble	-6.14	0.000467	7.22e-07	Poorly soluble	-3.19	0.421	0.000652	Soluble	Low	No	Yes	No	No	No	No	No	-8.87	3	3	1	1	4	0.17	0	1	2	6.98
GSK-68	OC[C@H]1O[C@@H](Oc2c(oc3c(c2=O)c(O)cc(c3)O)c2ccc(cc2)O)[C@@H]([C@H]([C@H]1O)O)O	C21H20O11	448.38	32	16	0.29	4	11	7	108.13	190.28	1.44	0.72	-0.24	-2.1	-0.12	-0.06	-3.18	0.297	0.000661	Soluble	-4.29	0.0228	5.08e-05	Moderately soluble	-2.1	3.55	0.00791	Soluble	Low	No	No	No	No	No	No	No	-8.52	2	0	1	1	3	0.17	0	0	1	5.29
GSK-69	COc1ccc(cc1)c1oc2c(CCC(O)(C)C)c(O)cc(c2c(=O)c1O[C@@H]1O[C@H](C)[C@@H]([C@H]([C@@H]1O[C@@H]1O[C@H](C)[C@@H]([C@H]([C@@H]1O)O)O)O)O)O	C33H42O15	678.68	48	16	0.55	9	15	8	168.06	238.2	2.36	1	0.64	-2.28	0.78	0.5	-4.33	0.0317	4.67e-05	Moderately soluble	-5.59	0.00174	2.56e-06	Moderately soluble	-3.08	0.558	0.000822	Soluble	Low	No	Yes	No	No	No	No	No	-9.73	3	3	1	1	4	0.17	0	0	2	7.27
GSK-70	COc1ccc(cc1)c1oc2c(CCC(O)(C)C)c(O)cc(c2c(=O)c1O)O	C21H22O7	386.4	28	16	0.29	5	7	4	105.87	120.36	3.11	3.4	3.29	0.59	3.68	2.81	-4.47	0.0131	3.38e-05	Moderately soluble	-5.61	0.000955	2.47e-06	Moderately soluble	-5.52	0.00116	3.01e-06	Moderately soluble	High	No	No	Yes	No	No	Yes	No	-6.24	0	0	0	0	0	0.55	0	0	1	3.78
GSK-71	OC[C@H]1O[C@@H](Oc2cc3oc(cc(=O)c3cc2CC=C(C)C)c2cc(O)c(c(c2)O)OC)[C@@H]([C@H]([C@@H]1O)O)O	C27H30O11	530.52	38	16	0.37	7	11	6	136.32	179.28	2.91	2.21	1.57	-0.92	2.23	1.6	-4.37	0.0226	4.25e-05	Moderately soluble	-5.61	0.0013	2.46e-06	Moderately soluble	-3.98	0.0552	0.000104	Soluble	Low	No	Yes	No	No	No	No	No	-7.97	3	2	1	1	3	0.17	0	1	1	5.8
GSK-72	COc1c(O)cc(cc1O)c1cc(=O)c2c(o1)cc(c(c2)CC=C(C)C)O	C21H20O6	368.38	27	16	0.19	4	6	3	104.2	100.13	3.04	4.01	4.09	1.31	4.28	3.35	-4.82	0.00551	1.5e-05	Moderately soluble	-5.82	0.000564	1.53e-06	Moderately soluble	-5.75	0.000658	1.79e-06	Moderately soluble	High	No	No	No	No	Yes	No	No	-5.7	0	0	0	0	0	0.55	0	1	2	3.54
GSK-73	CO[C@H]1CC=C2[C@]3(C1)N(CCCc1c3cc(OC)c(c1)OC)CC2	C20H27NO3	329.43	24	6	0.6	3	4	0	98.39	30.93	3.47	2.67	2.8	2.44	3.35	2.95	-3.55	0.0925	0.000281	Soluble	-2.97	0.352	0.00107	Soluble	-4.65	0.00741	2.25e-05	Moderately soluble	High	Yes	Yes	No	No	No	Yes	Yes	-6.41	0	0	0	0	0	0.55	0	1	0	4.84
GSK-74	COc1cc2C[C@@](C)(O)[C@H](C)Cc3c(c2c(c1OC)OC)c(OC)c1c(c3)OCO1	C23H28O7	416.46	30	12	0.48	4	7	1	112.15	75.61	3.64	3.9	3.6	1.96	4.39	3.5	-4.91	0.00511	1.23e-05	Moderately soluble	-5.19	0.00271	6.52e-06	Moderately soluble	-6.15	0.000293	7.03e-07	Poorly soluble	High	Yes	No	No	No	Yes	Yes	Yes	-6.07	0	0	0	0	0	0.55	0	0	2	4.58
GSK-75	Oc1cc(O)c2c(c1)oc(cc2=O)c1cc(C[C@@H](C(=C)C)O)c2c(c1)C=CC(O2)(C)C	C25H24O6	420.45	31	16	0.24	4	6	3	120.97	100.13	3.78	4.82	4.43	1.83	5.05	3.98	-5.6	0.00105	2.5e-06	Moderately soluble	-6.66	9.29e-05	2.21e-07	Poorly soluble	-6.46	0.000146	3.48e-07	Poorly soluble	High	No	No	No	No	Yes	No	Yes	-5.44	0	0	0	0	0	0.55	0	1	2	4.59
GSK-76	CC(=CCc1cc(cc(c1O)C[C@H](C(=C)C)O)c1cc(=O)c2c(o1)cc(cc2O)O)C	C25H26O6	422.47	31	16	0.24	6	6	4	122.59	111.13	3.48	5.97	4.57	1.83	5.41	4.25	-6.21	0.000263	6.22e-07	Poorly soluble	-8.08	3.51e-06	8.32e-09	Poorly soluble	-6.29	0.000219	5.18e-07	Poorly soluble	High	No	No	No	No	Yes	No	Yes	-4.64	0	0	0	0	1	0.55	0	1	2	4.42
GSK-77	Oc1cc(O)c2c(c1)oc(cc2=O)c1ccc2c(c1)C=CC(O2)(C)C	C20H16O5	336.34	25	16	0.15	1	5	2	96.09	79.9	3.16	4.44	3.95	1.64	3.9	3.42	-5.13	0.00249	7.41e-06	Moderately soluble	-5.84	0.00049	1.46e-06	Moderately soluble	-5.81	0.000517	1.54e-06	Moderately soluble	High	No	No	Yes	No	Yes	No	Yes	-5.2	0	0	0	0	0	0.55	0	0	1	3.7
GSK-78	CC(=CCc1cc(ccc1O)c1cc(=O)c2c(o1)cc(cc2O)O)C	C20H18O5	338.35	25	16	0.15	3	5	3	97.71	90.9	3.04	4.95	4.09	1.64	4.21	3.58	-5.33	0.00158	4.66e-06	Moderately soluble	-6.6	8.56e-05	2.53e-07	Poorly soluble	-5.64	0.000773	2.29e-06	Moderately soluble	High	No	No	No	No	Yes	No	No	-4.85	0	0	0	0	0	0.55	0	1	1	3.48
GSK-79	Oc1cc(O)c2c(c1)oc(cc2=O)c1cc(O)c2c(c1)C=CC(O2)(C)C	C20H16O6	352.34	26	16	0.15	1	6	3	98.11	100.13	3.04	3.81	3.65	1.09	3.42	3	-4.81	0.0054	1.53e-05	Moderately soluble	-5.61	0.00087	2.47e-06	Moderately soluble	-5.23	0.00208	5.92e-06	Moderately soluble	High	No	No	Yes	No	Yes	Yes	Yes	-5.74	0	0	0	0	0	0.55	0	0	2	3.77
GSK-80	OC[C@H]1O[C@@H](O[C@@H]2C[C@H](O)[C@@]3([C@@H](C2(C)C)CC[C@@]2([C@@H]3C[C@H](C)[C@@H]3[C@@]2(C)CC[C@H]3[C@@](O[C@@H]2O[C@H](CO[C@@H]3O[C@@H](C)[C@@H]([C@H]([C@H]3O)O)O)[C@H]([C@@H]([C@H]2O)O)O)(CCC=C(C)C)C)C)C)[C@@H]([C@H]([C@@H]1O)O)O[C@@H]1O[C@H](CO)[C@H]([C@@H]([C@H]1O)O)O	C55H94O22	1107.32	77	0	0.96	15	22	14	273.06	357.06	0.1	1.39	-0.93	-3.48	-1.65	-0.91	-6.59	0.000284	2.56e-07	Poorly soluble	-8.49	3.57e-06	3.22e-09	Poorly soluble	1.35	25000	22.6	Soluble	Low	No	Yes	No	No	No	No	No	-12.07	3	4	2	1	5	0.17	0	2	2	10
GSK-81	COc1ccc2c(c1OC)c1c(oc2=O)c(O)cc2c1C(=O)[N](CC2)(C)C	C20H20NO6	370.38	27	14	0.3	2	7	1	105.53	89.21	-1.03	2.46	2.08	2.22	3.12	1.77	-3.94	0.0427	0.000115	Soluble	-3.98	0.039	0.000105	Soluble	-6.46	0.000128	3.45e-07	Poorly soluble	High	No	Yes	No	No	No	No	No	-6.81	0	0	0	0	0	0.55	0	2	1	3.2
GSK-82	CC/C=C/CCO[C@@H]1O[C@H](CO)[C@H]([C@@H]([C@H]1O)O)O	C12H22O6	262.3	18	0	0.83	6	6	4	64.03	99.38	2.09	-0.88	-0.84	-1.02	-0.23	-0.18	-0.52	80	0.305	Very soluble	-0.73	49.4	0.188	Very soluble	0.6	1050	4.02	Soluble	High	No	Yes	No	No	No	No	No	-8.52	0	1	0	0	0	0.55	0	1	0	4.96
GSK-83	CC(=CCc1cc(ccc1O)c1cc(=O)c2c(o1)c(CC=C(C)C)c(cc2O)O)C	C25H26O5	406.47	30	16	0.24	5	5	3	121.43	90.9	3.62	6.52	5.59	2.64	6.01	4.88	-6.53	0.000119	2.94e-07	Poorly soluble	-8.23	2.42e-06	5.94e-09	Poorly soluble	-6.86	5.64e-05	1.39e-07	Poorly soluble	High	No	No	No	No	No	No	No	-4.15	0	0	0	0	1	0.55	0	1	2	4.09
GSK-84	CC(=CCc1cccc2c1oc(cc2=O)c1ccccc1)C	C20H18O2	290.36	22	16	0.15	3	2	0	91.64	30.21	3.49	5.49	4.97	3.39	5.66	4.6	-5.44	0.00106	3.64e-06	Moderately soluble	-5.88	0.00038	1.31e-06	Moderately soluble	-7.39	1.18e-05	4.07e-08	Poorly soluble	High	Yes	No	Yes	Yes	Yes	No	No	-4.17	0	0	0	0	1	0.55	0	1	1	3.51
GSK-85	COc1ccc(cc1)c1oc2c(CC=C(C)C)c(O[C@@H]3O[C@@H](CO)[C@@H]([C@H]([C@@H]3O[C@H]3O[C@@H](CO)[C@@H]([C@@H]([C@@H]3O)O)O)O)O)cc(c2c(=O)c1O[C@@H]1O[C@@H](C)[C@@H]([C@H]([C@H]1O[C@H]1O[C@@H](C)[C@@H]([C@H]([C@@H]1O)O)O)O)O)O	C45H60O24	984.94	69	16	0.62	14	24	13	230.89	376.27	3.85	-1.02	-3.26	-5.92	-2.78	-1.82	-4.55	0.0277	2.81e-05	Moderately soluble	-6.39	0.000397	4.03e-07	Poorly soluble	0.41	2560	2.59	Soluble	Low	No	Yes	No	No	No	No	No	-13.03	3	4	2	1	4	0.17	0	1	2	9.45
GSK-86	COc1ccc(cc1)c1oc2c3CCC(Oc3cc(c2c(=O)c1O)O)(C)C	C21H20O6	368.38	27	16	0.29	2	6	2	102.26	89.13	3.52	4.18	3.98	1.39	4.36	3.49	-5.06	0.00318	8.63e-06	Moderately soluble	-5.76	0.000639	1.74e-06	Moderately soluble	-6.39	0.000151	4.1e-07	Poorly soluble	High	No	No	Yes	No	Yes	No	Yes	-5.58	0	0	0	0	0	0.55	0	0	2	3.74
GSK-87	COc1ccc(cc1)c1oc2c(CC=C(C)C)c(O[C@H]3O[C@H](CO)[C@H]([C@@H]([C@H]3O)O)O)cc(c2c(=O)c1O[C@H]1O[C@@H](C)[C@@H]([C@H]([C@H]1O)O)O)O	C33H40O15	676.66	48	16	0.48	9	15	8	167.28	238.2	3.32	1.66	0.07	-2.35	0.77	0.69	-4.73	0.0125	1.85e-05	Moderately soluble	-6.28	0.000358	5.3e-07	Poorly soluble	-2.74	1.23	0.00181	Soluble	Low	No	Yes	No	No	No	No	No	-9.25	3	3	1	1	4	0.17	0	1	2	7.24
GSK-88	COc1cc(O)c2c(c1CC=C(C)C)oc(cc2=O)c1ccc(cc1)O	C21H20O5	352.38	26	16	0.19	4	5	2	102.18	79.9	3.37	4.92	4.39	1.86	4.75	3.86	-5.32	0.0017	4.83e-06	Moderately soluble	-6.33	0.000163	4.63e-07	Poorly soluble	-6.33	0.000163	4.63e-07	Poorly soluble	High	No	No	No	Yes	Yes	No	No	-4.96	0	0	0	0	0	0.55	0	1	2	3.65
GSK-89	OC[C@H]([C@H](c1ccc(c(c1)OC)O)O)c1ccc(c(c1)OC)O	C17H20O6	320.34	23	12	0.29	6	6	4	84.86	99.38	2.54	1.37	1.6	0.86	2.15	1.7	-2.68	0.67	0.00209	Soluble	-3.06	0.279	0.000871	Soluble	-3.35	0.143	0.000446	Soluble	High	No	No	No	No	No	No	Yes	-7.28	0	0	0	0	0	0.55	0	0	0	3.14
GSK-90	COc1ccc(cc1)c1oc2c(CC=C(C)C)c(O[C@@H]3O[C@H](CO)[C@H]([C@@H]([C@H]3O)O)O)cc(c2c(=O)c1O[C@H]1O[C@@H](C)[C@@H]([C@H]([C@H]1O[C@H]1O[C@@H](C)[C@@H]([C@H]([C@H]1O)O)O)O)O)O	C39H50O19	822.8	58	16	0.56	11	19	10	198.51	297.12	3.2	0.57	-1.08	-3.78	-0.71	-0.36	-4.78	0.0137	1.66e-05	Moderately soluble	-6.38	0.000341	4.15e-07	Poorly soluble	-1.47	27.9	0.034	Soluble	Low	No	Yes	No	No	No	No	No	-10.91	3	4	2	1	4	0.17	0	1	2	8.35
GSK-91	COc1ccc(cc1)c1oc2c(CC=C(C)C)c(O)cc(c2c(=O)c1O[C@@H]1O[C@@H](C)[C@@H]([C@H]([C@H]1O)O)O)O	C27H30O10	514.52	37	16	0.37	6	10	5	135.16	159.05	3.56	3.47	2.59	-0.16	2.83	2.46	-5.14	0.00373	7.24e-06	Moderately soluble	-6.49	0.000166	3.22e-07	Poorly soluble	-4.56	0.0142	2.76e-05	Moderately soluble	Low	No	Yes	No	No	No	No	Yes	-6.97	1	2	1	1	1	0.55	0	1	1	5.93
GSK-92	COc1ccc(cc1)c1oc2c(CC=C(C)C)c(O[C@@H]3O[C@H](CO)[C@H]([C@@H]([C@H]3O)O)O)cc(c2c(=O)c1O[C@@H]1O[C@@H](C)[C@@H]([C@H]([C@H]1O)O)O[C@@H]1O[C@@H](C)[C@@H]([C@H]([C@H]1O)O)O)O	C39H50O19	822.8	58	16	0.56	11	19	10	198.51	297.12	4.08	0.57	-1.08	-3.78	-0.71	-0.18	-4.78	0.0137	1.66e-05	Moderately soluble	-6.38	0.000341	4.15e-07	Poorly soluble	-1.47	27.9	0.034	Soluble	Low	No	Yes	No	No	No	No	No	-10.91	3	4	2	1	4	0.17	0	1	2	8.34
GSK-93	CC(Cc1occ(c1)[C@H]1CC=C([C@@H](C1)O)C)C	C15H22O2	234.33	17	5	0.6	3	2	1	70.48	33.37	3.13	2.98	3.66	2.49	3.56	3.16	-3.19	0.151	0.000646	Soluble	-3.34	0.106	0.000453	Soluble	-3.62	0.0569	0.000243	Soluble	High	Yes	No	No	No	No	Yes	No	-5.61	0	0	0	0	0	0.55	0	1	1	4.05
GSK-94	COc1ccc(cc1c1c(O)cc(c2c1oc(cc2=O)c1ccc(cc1)O)O)c1cc(=O)c2c(o1)cc(cc2O)O	C31H20O10	552.48	41	32	0.03	4	10	5	151.44	170.8	3.39	5.36	5.44	0.44	5.16	3.96	-6.96	6.12e-05	1.11e-07	Poorly soluble	-8.7	1.1e-06	1.99e-09	Poorly soluble	-9.39	2.26e-07	4.08e-10	Poorly soluble	Low	No	No	No	No	Yes	No	No	-5.86	1	2	1	1	2	0.55	0	0	2	4.35
GSK-95	COc1ccc(cc1)c1oc2c(CCC(OC)(C)C)c(O)cc(c2c(=O)c1O)O	C22H24O7	400.42	29	16	0.32	6	7	3	110.61	109.36	3.54	3.93	3.94	0.81	4.23	3.29	-4.81	0.00619	1.55e-05	Moderately soluble	-5.93	0.000475	1.19e-06	Moderately soluble	-6.21	0.000245	6.12e-07	Poorly soluble	High	No	No	No	No	Yes	Yes	No	-5.95	0	0	0	0	0	0.55	0	0	2	3.9
GSK-96	COc1ccc(cc1)c1oc2c(CC=C(C)C)c(O[C@H]3O[C@H](CO)[C@H]([C@@H]([C@H]3O)O)O)cc(c2c(=O)c1O[C@@H]1O[C@H](C)[C@H]([C@@H]([C@@H]1O)O[C@H]1O[C@@H](COC(=O)C)[C@H]([C@@H]([C@@H]1O)O)OC(=O)C)OC(=O)C)O	C45H56O23	964.91	68	16	0.56	18	23	8	228.88	335.56	4.27	1.24	-0.4	-3.39	0.35	0.42	-5.59	0.00248	2.57e-06	Moderately soluble	-7.88	1.26e-05	1.3e-08	Poorly soluble	-2.62	2.3	0.00239	Soluble	Low	No	Yes	No	No	No	No	No	-11.31	3	3	2	1	5	0.17	0	2	2	9.01
GSK-97	OC[C@H]1O[C@@H](Oc2cc(O)c3c(c2CCC(OC)(C)C)oc(c(c3=O)O)c2ccc(cc2)OC)[C@H]([C@H]([C@@H]1O)O)O	C28H34O12	562.56	40	16	0.46	9	12	6	142.73	188.51	3.12	2.13	1.42	-1.4	2.2	1.49	-4.37	0.0239	4.25e-05	Moderately soluble	-5.72	0.00107	1.9e-06	Moderately soluble	-4.43	0.0207	3.67e-05	Moderately soluble	Low	No	Yes	No	No	No	No	Yes	-8.22	3	3	1	1	3	0.17	0	0	2	6.18
GSK-98	COc1ccc(cc1)c1oc2c(CC=C(C)C)c(O[C@@H]3O[C@H](CO)[C@H]([C@@H]([C@H]3O)O)O)cc(c2c(=O)c1O[C@H]1O[C@@H](C)[C@@H]([C@H]([C@H]1O[C@@H]1O[C@H](C)[C@H]([C@@H]([C@H]1O)O)O)O)O)O	C39H50O19	822.8	58	16	0.56	11	19	10	198.51	297.12	4	0.57	-1.08	-3.78	-0.71	-0.2	-4.78	0.0137	1.66e-05	Moderately soluble	-6.38	0.000341	4.15e-07	Poorly soluble	-1.47	27.9	0.034	Soluble	Low	No	Yes	No	No	No	No	No	-10.91	3	4	2	1	4	0.17	0	1	2	8.35
GSK-99	CC(=O)CCCCCCCCCCCCC(=O)C	C16H30O2	254.41	18	0	0.88	13	2	0	79.43	34.14	3.66	4.65	4.85	3.27	5.4	4.37	-3.49	0.0825	0.000324	Soluble	-5.09	0.00205	8.06e-06	Moderately soluble	-5.41	0.000981	3.85e-06	Moderately soluble	High	Yes	No	Yes	No	No	No	No	-4.55	0	0	1	0	0	0.55	0	0	2	2.22
GSK-100	COc1ccc(cc1)c1oc2c(CC=C(C)C)c(ccc2c(=O)c1O[C@@H]1OC[C@H]([C@@H]([C@H]1O[C@@H]1O[C@@H](C)[C@@H]([C@H]([C@H]1O)O)O)O)O)O[C@@H]1O[C@H](CO)[C@H]([C@@H]([C@H]1O)O)O	C38H48O18	792.78	56	16	0.55	11	18	9	191.68	276.89	3.59	-0.06	-1.17	-3.5	-0.38	-0.3	-4.2	0.0497	6.27e-05	Moderately soluble	-5.3	0.00394	4.97e-06	Moderately soluble	-1.94	9.21	0.0116	Soluble	Low	No	Yes	No	No	No	No	No	-11.18	3	4	2	1	4	0.17	0	1	2	8.1
GSK-101	COc1ccc(cc1)c1oc2c(CC=C(C)C)c(O)ccc2c(=O)c1O	C21H20O5	352.38	26	16	0.19	4	5	2	102.18	79.9	3.19	4.58	4.39	1.86	4.75	3.75	-5.1	0.00279	7.92e-06	Moderately soluble	-5.98	0.000367	1.04e-06	Moderately soluble	-6.33	0.000163	4.63e-07	Poorly soluble	High	No	No	No	Yes	Yes	No	Yes	-5.2	0	0	0	0	0	0.55	0	1	2	3.73
GSK-102	COc1ccc(cc1)c1oc2c(CC=C(C)C)c(ccc2c(=O)c1O[C@@H]1O[C@@H](C)[C@@H](C[C@H]1O[C@@H]1O[C@@H](C)[C@@H]([C@H]([C@H]1O)O)O)O)O[C@@H]1O[C@H](CO)[C@H]([C@@H]([C@H]1O)O)O	C39H50O17	790.8	56	16	0.56	11	17	8	195.32	256.66	4.1	1.35	0.24	-2.6	0.64	0.74	-5.08	0.00659	8.34e-06	Moderately soluble	-6.34	0.00036	4.55e-07	Poorly soluble	-2.9	0.993	0.00126	Soluble	Low	No	Yes	No	No	No	No	No	-10.17	3	3	2	1	4	0.17	0	1	2	8.19
GSK-103	O=c1cc(O)c(c(o1)C)O	C6H6O4	142.11	10	6	0.17	0	4	2	33.99	70.67	1.14	-0.12	0.36	-0.61	0.87	0.33	-1.09	11.6	0.0814	Very soluble	-0.91	17.5	0.123	Very soluble	-1.15	10.1	0.0713	Soluble	High	No	No	No	No	No	No	No	-7.25	0	3	0	0	1	0.55	0	0	1	2.74
GSK-104	OC[C@H]1O[C@@H](Oc2cc(O)c3c(c2CC=C(C)C)O[C@H]([C@@H](C3=O)O)c2ccc(cc2)O)[C@@H]([C@H]([C@@H]1O)O)O	C26H30O11	518.51	37	12	0.42	6	11	7	128.57	186.37	1.78	1.96	0.14	-1.2	0.8	0.69	-4.13	0.0381	7.35e-05	Moderately soluble	-5.5	0.00164	3.17e-06	Moderately soluble	-2.08	4.32	0.00834	Soluble	Low	No	Yes	No	No	No	No	No	-8.07	3	1	1	1	3	0.17	0	1	1	5.78
GSK-105	OC[C@H]1O[C@@H](Oc2cc(O)c3c(c2CC=C(C)C)oc(c(c3=O)O)c2ccc(cc2)O)[C@H]([C@H]([C@@H]1O)O)O	C26H28O11	516.49	37	16	0.35	6	11	7	131.85	190.28	2.51	2.64	1.26	-1.12	1.68	1.39	-4.63	0.0121	2.35e-05	Moderately soluble	-6.29	0.000267	5.17e-07	Poorly soluble	-3.3	0.261	0.000505	Soluble	Low	No	Yes	No	No	No	No	No	-7.58	3	2	1	1	3	0.17	0	1	1	5.85
GSK-106	OC[C@H]1O[C@@H](Oc2cc(O)c3c(c2CC=C(C)C)oc(c(c3=O)O[C@@H]2OC[C@H]([C@H]([C@@H]2O[C@H]2O[C@@H](C)[C@@H]([C@H]([C@@H]2O)O)O)O)O)c2ccc(cc2)O)[C@@H]([C@H]([C@@H]1O)O)O	C37H46O19	794.75	56	16	0.54	10	19	11	189.23	308.12	2.03	-0.19	-1.77	-4.13	-1.41	-1.09	-4.2	0.0502	6.32e-05	Moderately soluble	-5.82	0.00119	1.5e-06	Moderately soluble	-0.66	176	0.221	Soluble	Low	No	Yes	No	No	No	No	No	-11.28	3	4	1	1	4	0.17	0	1	2	8.05
GSK-107	OC[C@H]1O[C@@H](Oc2cc(O)c3c(c2CC=C(C)C)oc(c(c3=O)O[C@H]2O[C@@H](C)[C@@H]([C@H]([C@@H]2O[C@H]2OC[C@H]([C@H]([C@@H]2O)O)O)O)O)c2ccc(cc2)O)[C@@H]([C@H]([C@@H]1O)O)O	C37H46O19	794.75	56	16	0.54	10	19	11	189.23	308.12	2.52	-0.19	-1.77	-4.13	-1.41	-1	-4.2	0.0502	6.32e-05	Moderately soluble	-5.82	0.00119	1.5e-06	Moderately soluble	-0.66	176	0.221	Soluble	Low	No	Yes	No	No	No	No	No	-11.28	3	4	1	1	4	0.17	0	1	2	8.05
GSK-108	COc1ccc(cc1)c1oc2c(CC=C(C)C)c(O)cc(c2c(=O)c1O[C@H]1O[C@H](C)[C@@H]([C@@H]([C@@H]1O)O[C@H]1O[C@@H](COC(=O)C)[C@H]([C@@H]([C@@H]1O)O)O)OC(=O)C)O	C37H44O17	760.74	54	16	0.49	13	17	6	187.02	250.34	4.65	2.47	1.56	-1.61	1.85	1.79	-5.47	0.00255	3.36e-06	Moderately soluble	-7.37	3.23e-05	4.25e-08	Poorly soluble	-3.92	0.0921	0.000121	Soluble	Low	No	Yes	No	No	No	No	No	-9.19	3	3	2	1	4	0.17	0	2	2	7.59
GSK-109	Oc1ccc(c(c1)O)C(=O)O	C7H6O4	154.12	11	6	0	1	4	3	37.45	77.76	0.75	1.63	0.8	0.4	0.26	0.77	-2.16	1.07	0.00692	Soluble	-2.88	0.205	0.00133	Soluble	-0.6	38.3	0.248	Soluble	High	No	No	No	No	No	No	Yes	-6.08	0	3	0	0	1	0.56	0	0	1	1.1
GSK-110	C[C@@H]1CC[C@H]2[C@@H]1[C@H]1[C@H](C1(C)C)CC[C@]2(C)O	C15H26O	222.37	16	0	1	0	1	1	68.82	20.23	3.11	3.74	3.47	3.81	3	3.43	-3.57	0.0592	0.000266	Soluble	-3.86	0.0309	0.000139	Soluble	-2.73	0.41	0.00185	Soluble	High	Yes	No	No	Yes	No	No	No	-5	0	0	0	0	1	0.55	0	0	2	3.58
GSK-111	CCCCCCCCCCCCCCCCCCCCCCCCC[C@@H](CCCCC)O	C31H64O	452.84	32	0	1	28	1	1	152.29	20.23	7.95	15.11	11.31	7.65	12.11	10.83	-10.32	2.17e-08	4.8e-11	Insoluble	-15.66	1e-13	2.21e-16	Insoluble	-11.33	2.1e-09	4.63e-12	Insoluble	Low	No	Yes	No	No	No	No	No	1.67	1	3	1	1	3	0.55	0	0	3	4.55
GSK-112	COc1ccc(cc1)c1oc2c(CC=C(C)C)c(O[C@H]3O[C@H](CO)[C@@H]([C@@H]([C@H]3O)O)O)cc(c2c(=O)c1O[C@@H]1O[C@H](C)[C@@H]([C@@H]([C@H]1O)O[C@@H]1O[C@@H](C)[C@@H]([C@H]([C@@H]1O)O)O)O)O	C39H50O19	822.8	58	16	0.56	11	19	10	198.51	297.12	3.98	0.57	-1.08	-3.78	-0.71	-0.2	-4.78	0.0137	1.66e-05	Moderately soluble	-6.38	0.000341	4.15e-07	Poorly soluble	-1.47	27.9	0.034	Soluble	Low	No	Yes	No	No	No	No	No	-10.91	3	4	2	1	4	0.17	0	1	2	8.32
GSK-113	OC[C@H]1O[C@@H](Oc2cc(O)c3c(c2CC=C(C)C)oc(c(c3=O)O[C@@H]2O[C@H](CO)[C@H]([C@@H]([C@@H]2O)O)O)c2ccc(cc2)O)[C@H]([C@H]([C@@H]1O)O)O	C32H38O16	678.63	48	16	0.47	9	16	10	163.98	269.43	1.91	0.84	-1.26	-3.27	-0.39	-0.43	-4.23	0.04	5.9e-05	Moderately soluble	-6.08	0.000563	8.3e-07	Poorly soluble	-1.48	22.5	0.0332	Soluble	Low	No	Yes	No	No	No	No	No	-9.84	3	4	1	1	4	0.17	0	1	2	7.15
GSK-114	COc1ccc(cc1)c1oc2c(CC=C(C)C)c(O[C@@H]3O[C@H](CO)[C@H]([C@@H]([C@H]3O)O)O)cc(c2c(=O)c1O[C@@H]1O[C@H](C)[C@@H]([C@@H]([C@H]1O)O[C@H]1O[C@@H](CO)[C@H]([C@H]([C@@H]1O)O)O)O)O	C39H50O20	838.8	59	16	0.56	12	20	11	199.67	317.35	3.71	0.07	-2.11	-4.5	-1.3	-0.83	-4.49	0.0269	3.21e-05	Moderately soluble	-6.29	0.000432	5.15e-07	Poorly soluble	-0.89	109	0.13	Soluble	Low	No	Yes	No	No	No	No	No	-11.37	3	4	2	1	4	0.17	0	1	2	8.36
GSK-115	OC[C@@H]1[C@H](O[C@@H]([C@H]1CO)c1cc(OC)c(c(c1)OC)O)c1cc(OC)c(c(c1)OC)O	C22H28O9	436.45	31	12	0.45	8	9	4	111.24	127.07	2.89	1.23	1.51	-0.22	2.13	1.51	-3.08	0.364	0.000833	Soluble	-3.5	0.139	0.000319	Soluble	-3.75	0.0774	0.000177	Soluble	High	No	Yes	No	No	No	No	No	-8.09	0	0	0	0	0	0.55	0	0	2	4.5
GSK-116	COc1ccc(cc1)c1oc2c(CC=C(C)C)c(O[C@@H]3O[C@H](CO)[C@H]([C@@H]([C@H]3O)O)O)cc(c2c(=O)c1O[C@H]1O[C@@H](C)[C@@H]([C@H]([C@H]1O)O)O)O	C33H40O15	676.66	48	16	0.48	9	15	8	167.28	238.2	3.08	1.66	0.07	-2.35	0.77	0.65	-4.73	0.0125	1.85e-05	Moderately soluble	-6.28	0.000358	5.3e-07	Poorly soluble	-2.74	1.23	0.00181	Soluble	Low	No	Yes	No	No	No	No	No	-9.25	3	3	1	1	4	0.17	0	1	2	7.24
GSK-117	COc1cc(ccc1O)C[C@@]1(O)CO[C@H]([C@]1(CO)CC(=O)O)c1ccc(c(c1)OC)O	C22H26O9	434.44	31	12	0.41	8	9	5	109.42	145.91	2.05	1.25	1.29	-0.03	2.22	1.36	-3.08	0.362	0.000833	Soluble	-3.91	0.0531	0.000122	Soluble	-3.94	0.0493	0.000114	Soluble	Low	No	Yes	No	No	No	No	No	-8.06	0	0	1	1	0	0.56	0	0	2	4.34
GSK-118	OC[C@H]1O[C@@H](Oc2cc3ccc4c(c3c(c2OC)OC)cc(c(c4)O)OC)[C@@H]([C@H]([C@@H]1O)O)O	C23H26O10	462.45	33	14	0.39	6	10	5	117.1	147.3	2.69	1.82	0.9	-0.8	1.04	1.13	-3.77	0.0782	0.000169	Soluble	-4.53	0.0136	2.93e-05	Moderately soluble	-3.24	0.265	0.000574	Soluble	Low	No	Yes	No	No	No	No	No	-7.83	0	0	1	1	0	0.55	0	1	1	5.18
GSK-119	COc1cc2c(cc1O)ccc1c2c(OC)c(c(c1)O)OC	C17H16O5	300.31	22	14	0.18	3	5	2	84.98	68.15	2.95	3.63	3.43	1.78	3.1	2.98	-4.26	0.0164	5.47e-05	Moderately soluble	-4.75	0.00535	1.78e-05	Moderately soluble	-4.97	0.00321	1.07e-05	Moderately soluble	High	Yes	No	Yes	Yes	Yes	Yes	Yes	-5.55	0	0	0	0	0	0.55	0	1	1	2
GSK-120	OC[C@H]1O[C@@H](O[C@@H](C(O)(C)C)CC/C(=C/CC[C@](C=C)(O)C)/C)[C@@H]([C@H]([C@@H]1O)O)O	C21H38O8	418.52	29	0	0.81	11	8	6	109.22	139.84	2.79	0.7	0.39	-0.51	1.31	0.93	-2.15	2.96	0.00708	Soluble	-3.21	0.256	0.000611	Soluble	-0.31	206	0.493	Soluble	High	No	Yes	No	No	No	No	No	-8.36	1	0	1	1	1	0.55	0	1	2	6.01
GSK-121	OC[C@@H]1O[C@@H](Oc2cc(O)c3c(c2CC=C(C)C)oc(c(c3=O)O)c2ccc(cc2)OC)[C@@H]([C@H]([C@@H]1O)O)O	C27H30O11	530.52	38	16	0.37	7	11	6	136.32	179.28	3.38	2.97	1.57	-0.92	2.23	1.85	-4.85	0.0075	1.41e-05	Moderately soluble	-6.4	0.000212	4e-07	Poorly soluble	-3.98	0.0552	0.000104	Soluble	Low	No	Yes	No	No	No	No	No	-7.43	3	2	1	1	3	0.17	0	1	1	5.97
GSK-122	COc1ccc(cc1)c1oc2c(CC=C(C)C)c(O)cc(c2c(=O)c1O[C@@H]1O[C@H](C)[C@@H]([C@@H]([C@@H]1O)O)O)O	C27H30O10	514.52	37	16	0.37	6	10	5	135.16	159.05	3.95	3.47	2.59	-0.16	2.83	2.54	-5.14	0.00373	7.24e-06	Moderately soluble	-6.49	0.000166	3.22e-07	Poorly soluble	-4.56	0.0142	2.76e-05	Moderately soluble	Low	No	Yes	No	No	No	No	Yes	-6.97	1	2	1	1	1	0.55	0	1	1	5.93
GSK-123	CC(=CCc1c(O)cc(c2c1oc(c1ccc(cc1)O)c(c2=O)O[C@@H]1O[C@@H](C)[C@@H]([C@H]([C@H]1O)O)O)O)C	C26H28O10	500.49	36	16	0.35	5	10	6	130.69	170.05	2.36	3.14	2.29	-0.36	2.27	1.94	-4.92	0.00602	1.2e-05	Moderately soluble	-6.38	0.000208	4.16e-07	Poorly soluble	-3.87	0.0671	0.000134	Soluble	Low	No	Yes	No	No	No	No	Yes	-7.12	2	2	1	1	2	0.17	0	1	1	5.82
GSK-124	OC[C@H]1O[C@@H](Oc2c(oc3c(c2=O)c(O)cc(c3CC=C(C)C)O)c2ccc(cc2)O)[C@@H]([C@H]([C@@H]1O)O)O[C@@H]1O[C@@H](C)[C@@H]([C@H]([C@H]1O)O)O	C32H38O15	662.64	47	16	0.47	8	15	9	163.08	249.2	2.89	1.55	0.12	-2.53	0.2	0.45	-4.65	0.0149	2.25e-05	Moderately soluble	-6.39	0.000268	4.05e-07	Poorly soluble	-2.06	5.78	0.00873	Soluble	Low	No	Yes	No	No	No	No	No	-9.24	3	3	1	1	4	0.17	0	1	2	7.08
GSK-125	OC[C@H]1C[C@@H](Oc2cc(O)c3c(c2CC=C(C)C)oc(c(c3=O)O[C@H]2O[C@@H](C)[C@@H]([C@H]([C@H]2O[C@H]2O[C@H](CO)[C@H]([C@@H]([C@H]2O)O)O)O)O)c2ccc(cc2)O)[C@@H]([C@H]([C@@H]1O)O)O	C39H50O19	822.8	58	16	0.56	11	19	12	198.92	319.12	4.03	0.34	-1.75	-4.18	-1.22	-0.56	-4.63	0.0191	2.32e-05	Moderately soluble	-6.61	0.000204	2.48e-07	Poorly soluble	-0.75	147	0.179	Soluble	Low	No	Yes	No	No	No	No	No	-11.08	3	4	2	1	4	0.17	0	1	2	8.33
GSK-126	CC(=CCc1c(O)cc(c2c1oc(c1ccc(cc1)O)c(c2=O)O[C@@H]1OC[C@H]([C@@H]([C@H]1O[C@@H]1O[C@@H](C)[C@@H]([C@H]([C@H]1O)O)O)O)O)O)C	C31H36O14	632.61	45	16	0.45	7	14	8	157.11	228.97	3.25	1.61	0.76	-1.98	0.67	0.86	-4.58	0.0167	2.64e-05	Moderately soluble	-6.03	0.00059	9.33e-07	Poorly soluble	-2.5	1.99	0.00314	Soluble	Low	No	Yes	No	No	No	No	No	-9.02	3	3	1	1	4	0.17	0	1	1	6.86
GSK-127	CC[C@H](C(C)C)CC[C@@H]([C@H]1CC[C@H]2[C@]1(C)CC[C@H]1[C@H]2[C@H](O)C=C2[C@@]1(C)CC[C@H](C2)O)C	C29H50O2	430.71	31	0	0.93	6	2	2	134.39	40.46	4.78	8.23	7	5.8	6.15	6.39	-7.3	2.16e-05	5.02e-08	Poorly soluble	-8.94	4.93e-07	1.15e-09	Poorly soluble	-5.37	0.00185	4.3e-06	Moderately soluble	Low	No	No	No	No	No	No	No	-3.08	1	3	0	1	1	0.55	0	1	2	6.42
GSK-128	Oc1ccc(cc1)c1oc2cc(O[C@@H]3O[C@@H](C)[C@@H]([C@H]([C@H]3O)O)O)cc(c2c(=O)c1O[C@@H]1O[C@@H](C)[C@@H]([C@H]([C@H]1O)O)O)O	C27H30O14	578.52	41	16	0.44	5	14	8	137.93	228.97	2.44	-0.09	-0.72	-2.69	-1.04	-0.42	-3.33	0.271	0.000469	Soluble	-4.27	0.0313	5.42e-05	Moderately soluble	-1.46	19.9	0.0344	Soluble	Low	No	Yes	No	No	No	No	No	-9.89	3	4	1	1	3	0.17	0	0	1	6.48
GSK-129	COc1ccc(cc1)[C@@H]1Oc2c(C(=O)[C@@H]1O[C@H]1O[C@@H](C)[C@@H]([C@H]([C@@H]1O)O[C@H]1O[C@@H](OC(=O)C)[C@@H]([C@H]([C@@H]1O)O)O)OC(=O)C)c(O)cc(c2CC=C(C)C)O	C36H44O17	748.72	53	12	0.53	12	17	6	179.19	246.43	4.34	2.1	0.74	-1.47	0.55	1.25	-5.18	0.00494	6.6e-06	Moderately soluble	-6.91	9.31e-05	1.24e-07	Poorly soluble	-2.32	3.62	0.00483	Soluble	Low	No	Yes	No	No	No	No	No	-9.38	3	3	2	1	4	0.17	0	2	2	7.3
GSK-130	OC[C@H]1O[C@@H](Oc2cc(O)c3c(c2CC=C(C)C)oc(c(c3=O)O[C@@H]2O[C@@H](C)[C@@H]([C@H]([C@@H]2O)O[C@H]2O[C@H](COC(=O)C)[C@H]([C@@H]([C@H]2OC(=O)C)O)O)OC(=O)C)c2ccc(cc2)OC)[C@@H]([C@H]([C@@H]1O)O)O	C45H56O23	964.91	68	16	0.56	18	23	8	228.88	335.56	5.17	1.24	-0.4	-3.39	0.35	0.6	-5.59	0.00248	2.57e-06	Moderately soluble	-7.88	1.26e-05	1.3e-08	Poorly soluble	-2.62	2.3	0.00239	Soluble	Low	No	Yes	No	No	No	No	No	-11.31	3	3	2	1	5	0.17	0	2	2	9.01
GSK-131	CCCCCCCCCCCCCCCCCCCCCCCCCCCCC	C29H60	408.79	29	0	1	26	0	0	141.52	0	7.79	15.32	11.56	9.25	11.97	11.18	-10.31	2e-08	4.9e-11	Insoluble	-15.45	1.45e-13	3.56e-16	Insoluble	-11.5	1.3e-09	3.18e-12	Insoluble	Low	No	Yes	No	No	No	No	No	2.08	1	3	1	1	3	0.55	0	0	3	3.81
GSK-132	CCCCCCCCCCCCCCCCCCCCCCCCCCO	C26H54O	382.71	27	0	1	24	1	1	128.26	20.23	6.68	12.53	9.36	6.67	10.07	9.06	-8.52	1.15e-06	3e-09	Poorly soluble	-12.98	4.02e-11	1.05e-13	Insoluble	-9.75	6.84e-08	1.79e-10	Poorly soluble	Low	No	No	No	No	No	No	No	0.26	1	2	1	1	3	0.55	0	0	3	3.47
GSK-133	OCCCc1cc2c(c(c1)OC)O[C@H]([C@H]2CO)c1ccc(c(c1)OC)O	C20H24O6	360.4	26	12	0.4	7	6	3	96.99	88.38	2.98	2.08	2.22	1.17	3.33	2.35	-3.26	0.196	0.000544	Soluble	-3.57	0.098	0.000272	Soluble	-4.85	0.00511	1.42e-05	Moderately soluble	High	No	Yes	No	No	No	Yes	No	-7.02	0	0	0	0	0	0.55	0	0	1	4
GSK-134	CCCCCCCCCCCCCCCCCCCCCCCCCCCCCCC	C31H64	436.84	31	0	1	28	0	0	151.13	0	8.25	16.41	12.34	9.64	12.86	11.9	-11.04	4e-09	9.15e-12	Insoluble	-16.58	1.15e-14	2.63e-17	Insoluble	-12.28	2.29e-10	5.24e-13	Insoluble	Low	No	Yes	No	No	No	No	No	2.69	1	3	1	1	3	0.55	0	0	3	4.06
GSK-135	CCCCCCCCCCCCCCCCCCCCCCCCCCCCCC	C30H62	422.81	30	0	1	27	0	0	146.32	0	7.86	15.87	11.95	9.44	12.41	11.51	-10.68	8.88e-09	2.1e-11	Insoluble	-16.02	4.04e-14	9.56e-17	Insoluble	-11.89	5.46e-10	1.29e-12	Insoluble	Low	No	Yes	No	No	No	No	No	2.39	1	3	1	1	3	0.55	0	0	3	3.94
GSK-136	Oc1cc(O)c2c(c1)oc(c(c2=O)O)c1ccc(c(c1)O)O	C15H10O7	302.24	22	16	0	1	7	5	78.04	131.36	1.63	1.54	1.99	-0.56	1.54	1.23	-3.16	0.211	0.000698	Soluble	-3.91	0.0374	0.000124	Soluble	-3.24	0.173	0.000573	Soluble	High	No	No	Yes	No	No	Yes	Yes	-7.05	0	0	0	0	0	0.55	1	1	0	3.23
GSK-137	COc1cc(cc(c1O)OC)c1cc(=O)c2c(o1)cc(cc2O)O	C17H14O7	330.29	24	16	0.12	3	7	3	86.97	109.36	2.58	3.07	2.59	-0.07	2.59	2.15	-4.12	0.0252	7.63e-05	Moderately soluble	-5.03	0.00306	9.26e-06	Moderately soluble	-4.63	0.00771	2.33e-05	Moderately soluble	High	No	No	Yes	No	Yes	Yes	Yes	-6.14	0	0	0	0	0	0.55	0	0	0	3.21
GSK-138	OCC(C(c1ccc(c(c1)OC)O)O)c1ccc(c(c1)OC)O	C17H20O6	320.34	23	12	0.29	6	6	4	84.86	99.38	2.51	1.37	1.6	0.86	2.15	1.7	-2.68	0.67	0.00209	Soluble	-3.06	0.279	0.000871	Soluble	-3.35	0.143	0.000446	Soluble	High	No	No	No	No	No	No	Yes	-7.28	0	0	0	0	0	0.55	0	0	0	3.14
GSK-139	OC[C@H]1O[C@@H](OC(CCC2C(=CC(=O)CC2(C)C)C)C)[C@@H]([C@H]([C@@H]1O)O)O	C19H32O7	372.45	26	0	0.84	6	7	4	95.5	116.45	2.9	0.3	0.53	-0.17	1.11	0.93	-1.94	4.25	0.0114	Very soluble	-2.31	1.83	0.00492	Soluble	-1.12	28.4	0.0762	Soluble	High	No	Yes	No	No	No	No	No	-8.36	0	0	0	0	0	0.55	0	0	1	5.61
GSK-140	CCCCC/C=C\C/C=C\CCCCCCCC(=O)O	C18H32O2	280.45	20	0	0.72	14	2	1	89.46	37.3	4.14	6.98	5.88	4.47	5.77	5.45	-5.05	0.00249	8.87e-06	Moderately soluble	-7.58	7.42e-06	2.64e-08	Poorly soluble	-4.67	0.00593	2.11e-05	Moderately soluble	High	Yes	No	Yes	No	Yes	No	No	-3.05	1	1	1	1	1	0.85	0	1	2	3.1
GSK-141	OC[C@H]1O[C@@H](Oc2cc3oc(cc(=O)c3cc2CC=C(C)C)c2cc(O)c(c(c2)O)OC)[C@@H]([C@H]([C@@H]1O)O)O	C27H30O11	530.52	38	16	0.37	7	11	6	136.32	179.28	2.91	2.21	1.57	-0.92	2.23	1.6	-4.37	0.0226	4.25e-05	Moderately soluble	-5.61	0.0013	2.46e-06	Moderately soluble	-3.98	0.0552	0.000104	Soluble	Low	No	Yes	No	No	No	No	No	-7.97	3	2	1	1	3	0.17	0	1	1	5.8
GSK-142	CC[C@@H](C(C)C)CC[C@H]([C@H]1CC[C@@H]2[C@]1(C)CC[C@H]1[C@H]2CC=C2[C@]1(C)CC[C@@H](C2)O)C	C29H50O	414.71	30	0	0.93	6	1	1	133.23	20.23	5.05	9.34	8.02	6.73	7.04	7.24	-7.9	5.23e-06	1.26e-08	Poorly soluble	-9.67	8.9e-08	2.15e-10	Poorly soluble	-6.19	0.000269	6.49e-07	Poorly soluble	Low	No	No	No	No	No	No	No	-2.2	1	3	0	1	2	0.55	0	1	2	6.3
GSK-143	OC[C@H]1O[C@@H](Oc2c(oc3c(c2=O)c(O)cc(c3)O)c2ccc(c(c2)O)O)[C@@H]([C@H]([C@H]1O)O)O	C21H20O12	464.38	33	16	0.29	4	12	8	110.16	210.51	1.45	0.36	-0.54	-2.59	-0.59	-0.38	-3.04	0.423	0.00091	Soluble	-4.35	0.021	4.51e-05	Moderately soluble	-1.51	14.3	0.0308	Soluble	Low	No	No	No	No	No	No	No	-8.88	2	1	1	1	3	0.17	1	1	1	5.32
GSK-144	COc1ccc(cc1)c1oc2c(CC=C(C)C)c(O)cc(c2c(=O)c1O[C@@H]1O[C@@H](C)[C@@H]([C@H]([C@H]1O)O)O)O	C27H30O10	514.52	37	16	0.37	6	10	5	135.16	159.05	3.56	3.47	2.59	-0.16	2.83	2.46	-5.14	0.00373	7.24e-06	Moderately soluble	-6.49	0.000166	3.22e-07	Poorly soluble	-4.56	0.0142	2.76e-05	Moderately soluble	Low	No	Yes	No	No	No	No	Yes	-6.97	1	2	1	1	1	0.55	0	1	1	5.93
GSK-145	COc1cc(cc(c1O)OC)c1cc(=O)c2c(o1)c(CC=C(C)C)c(cc2O)O	C22H22O7	398.41	29	16	0.23	5	7	3	110.69	109.36	3.15	4.54	4.1	1	4.36	3.43	-5.25	0.00225	5.64e-06	Moderately soluble	-6.56	0.00011	2.76e-07	Poorly soluble	-5.85	0.00056	1.41e-06	Moderately soluble	High	No	No	No	No	Yes	No	No	-5.51	0	0	0	0	0	0.55	0	1	2	3.85
GSK-146	OC[C@@H]1O[C@@H](Oc2c(oc3c(c2=O)c(O)cc(c3CC=C(C)C)O[C@@H]2O[C@H](CO)[C@H]([C@@H]([C@H]2O)O)O)c2ccc(cc2)O)[C@@H]([C@@H]([C@H]1O[C@@H]1O[C@H](C)[C@H]([C@@H]([C@H]1O)O)O)O)O	C38H48O20	824.78	58	16	0.55	11	20	12	195.2	328.35	3.62	-0.81	-2.41	-4.67	-1.87	-1.23	-3.92	0.0988	0.00012	Soluble	-5.61	0.00204	2.48e-06	Moderately soluble	-0.2	514	0.624	Soluble	Low	No	Yes	No	No	No	No	No	-11.91	3	4	2	1	4	0.17	0	1	2	8.26
GSK-147	O[C@H]1CC[C@]2(C(=C[CH][C@@H]3[C@@H]2CC[C@]2([C@H]3[CH]C[C@@H]2[C@@H](CC[C@H](C([CH2])C)C)C)C)C1)[CH2]	C28H44O	396.65	29	0	0.93	5	1	1	124.19	20.23	0	8.8	6.89	6.54	6.63	5.77	-7.51	1.22e-05	3.07e-08	Poorly soluble	-9.11	3.09e-07	7.8e-10	Poorly soluble	-5.79	0.000636	1.6e-06	Moderately soluble	Low	No	Yes	No	No	Yes	No	No	-2.47	1	2	0	1	2	0.55	0	1	2	6.07
GSK-148	OC[C@H]1O[C@@H](Oc2cc3CCc4c(c3cc2OC)c(OC)c(c(c4)OC)OC)[C@@H]([C@H]([C@@H]1O)O)O	C24H30O10	478.49	34	12	0.5	7	10	4	119.81	136.3	3.35	1.57	0.67	-0.43	1.76	1.38	-3.59	0.122	0.000254	Soluble	-4.04	0.0434	9.06e-05	Moderately soluble	-3.64	0.109	0.000227	Soluble	High	No	Yes	No	No	No	No	No	-8.1	0	0	0	1	0	0.55	0	0	1	5.48
GSK-149	OC[C@H]1O[C@@H](Oc2cc(O)c3c(c2CC=C(C)C)oc(c(c3=O)O)c2ccc(cc2)OC)[C@@H]([C@H]([C@@H]1O)O)O	C27H30O11	530.52	38	16	0.37	7	11	6	136.32	179.28	3.68	2.97	1.57	-0.92	2.23	1.91	-4.85	0.0075	1.41e-05	Moderately soluble	-6.4	0.000212	4e-07	Poorly soluble	-3.98	0.0552	0.000104	Soluble	Low	No	Yes	No	No	No	No	No	-7.43	3	2	1	1	3	0.17	0	1	1	5.97
GSK-150	COc1ccc(cc1)c1oc2c(CC=C(C)C)c(O[C@@H]3O[C@H](CO)[C@H]([C@@H]([C@H]3O)O)O)cc(c2c(=O)c1O[C@@H]1O[C@@H](C)[C@@H]([C@H]([C@H]1O)O)O)O	C33H40O15	676.66	48	16	0.48	9	15	8	167.28	238.2	2.98	1.66	0.07	-2.35	0.77	0.63	-4.73	0.0125	1.85e-05	Moderately soluble	-6.28	0.000358	5.3e-07	Poorly soluble	-2.74	1.23	0.00181	Soluble	Low	No	Yes	No	No	No	No	No	-9.25	3	3	1	1	4	0.17	0	1	2	7.24
GSK-151	OC[C@H]1O[C@@H](Oc2cc(O)c3c(c2CC=C(C)C)oc(c(c3=O)O[C@@H]2O[C@@H](C)[C@@H]([C@H]([C@H]2O)O)O)c2ccc(cc2)O)[C@@H]([C@H]([C@@H]1O)O)O	C32H38O15	662.64	47	16	0.47	8	15	9	162.81	249.2	2.69	1.34	-0.24	-2.53	0.2	0.29	-4.52	0.0202	3.04e-05	Moderately soluble	-6.17	0.000443	6.68e-07	Poorly soluble	-2.06	5.78	0.00873	Soluble	Low	No	Yes	No	No	No	No	No	-9.39	3	3	1	1	4	0.17	0	1	2	7.11
GSK-152	Oc1ccc(cc1)c1oc2cc(O[C@@H]3O[C@@H](C)[C@@H]([C@H]([C@H]3O)O)O)cc(c2c(=O)c1O[C@@H]1O[C@@H](C)[C@@H]([C@H]([C@H]1O[C@@H]1OC[C@H]([C@@H]([C@H]1O)O)O)O)O)O	C32H38O18	710.63	50	16	0.53	7	18	10	164.35	287.89	2.18	-1.62	-2.25	-4.24	-2.68	-1.72	-3	0.71	0.001	Soluble	-3.92	0.0863	0.000121	Soluble	-0.07	599	0.843	Soluble	Low	No	Yes	No	No	No	No	No	-11.79	3	4	1	1	4	0.17	0	0	1	7.4
GSK-153	OC[C@@H]1O[C@@H](Oc2c(oc3c(c2=O)c(O)cc(c3CC=C(C)C)O)c2ccc(cc2)OC)[C@@H]([C@@H]([C@H]1O[C@@H]1O[C@H](C)[C@H]([C@@H]([C@H]1O)O)O)O)O	C33H40O15	676.66	48	16	0.48	9	15	8	167.54	238.2	2.65	1.32	0.42	-2.35	0.77	0.56	-4.52	0.0205	3.02e-05	Moderately soluble	-5.92	0.000808	1.19e-06	Moderately soluble	-2.74	1.23	0.00181	Soluble	Low	No	Yes	No	No	No	No	No	-9.49	3	3	1	1	4	0.17	0	1	2	7.2
GSK-154	OC[C@H]1O[C@@H](O[C@H]2CC(=C(C(C2)(C)C)CCC(=O)C)C)[C@@H]([C@H]([C@@H]1O)O)O	C19H32O7	372.45	26	0	0.84	6	7	4	95.5	116.45	2.45	-0.22	0.68	-0.17	1.24	0.79	-1.61	9.05	0.0243	Very soluble	-1.77	6.35	0.017	Very soluble	-1.35	16.7	0.0448	Soluble	High	No	Yes	No	No	No	No	No	-8.73	0	0	0	0	0	0.55	0	1	1	5.66
GSK-155	OC[C@H]1O[C@@H](O[C@@H]2CCC(=C(C2(C)C)CCC(=O)C)C)[C@@H]([C@H]([C@@H]1O)O)O	C19H32O7	372.45	26	0	0.84	6	7	4	95.5	116.45	3.04	-0.22	0.68	-0.17	1.24	0.91	-1.61	9.05	0.0243	Very soluble	-1.77	6.35	0.017	Very soluble	-1.35	16.7	0.0448	Soluble	High	No	Yes	No	No	No	No	No	-8.73	0	0	0	0	0	0.55	0	1	1	5.66
GSK-156	COc1ccc(cc1)C(=O)CO[C@@H]1O[C@@H](C)[C@@H]([C@H]([C@H]1O)O)O	C15H20O7	312.32	22	6	0.53	5	7	3	75.51	105.45	1.84	-0.17	-0.28	-1.05	0.2	0.11	-1.54	8.99	0.0288	Very soluble	-1.59	8.04	0.0257	Very soluble	-1.24	17.9	0.0574	Soluble	High	No	No	No	No	No	No	No	-8.33	0	0	0	0	0	0.55	0	0	0	4.22
GSK-157	OC[C@H]1O[C@@H](Oc2c(OC)cc(cc2OC)[C@H]2OC[C@H]3[C@@H]2CO[C@@H]3c2cc(OC)c(c(c2)OC)OC)[C@@H]([C@H]([C@@H]1O)O)O	C29H38O13	594.6	42	12	0.59	10	13	4	144.48	163.99	3.77	0.75	0.33	-1.42	1.25	0.94	-3.55	0.167	0.000282	Soluble	-3.77	0.1	0.000169	Soluble	-3.3	0.299	0.000502	Soluble	Low	No	Yes	No	No	No	No	No	-9.39	2	3	1	1	2	0.17	0	0	2	6.19
GSK-158	OC[C@@H]1[C@H](O[C@@H]([C@H]1CO)c1cc(OC)c(c(c1)OC)O)c1cc(OC)c(c(c1)OC)O	C22H28O9	436.45	31	12	0.45	8	9	4	111.24	127.07	2.89	1.23	1.51	-0.22	2.13	1.51	-3.08	0.364	0.000833	Soluble	-3.5	0.139	0.000319	Soluble	-3.75	0.0774	0.000177	Soluble	High	No	Yes	No	No	No	No	No	-8.09	0	0	0	0	0	0.55	0	0	2	4.5
GSK-159	COc1ccc(cc1)c1oc2c(CC=C(C)C)c(O)cc(c2c(=O)c1O[C@@H]1O[C@@H](C)[C@@H]([C@H]([C@H]1O[C@@H]1OC[C@H]([C@@H]([C@H]1O)O)O)O)O)O	C32H38O14	646.64	46	16	0.47	8	14	7	161.58	217.97	3.7	1.94	1.06	-1.8	1.23	1.23	-4.8	0.0102	1.58e-05	Moderately soluble	-6.14	0.000467	7.22e-07	Poorly soluble	-3.19	0.421	0.000652	Soluble	Low	No	Yes	No	No	No	No	No	-8.87	3	3	1	1	4	0.17	0	1	2	6.98
GSK-160	OC[C@@H]1O[C@@H](Oc2c(oc3c(c2=O)c(O)cc(c3CC=C(C)C)O)c2ccc(cc2)OC)[C@@H]([C@@H]([C@H]1O)OC(=O)C)O[C@@H]1O[C@H](C)[C@H]([C@@H]([C@H]1O)O)O	C35H42O16	718.7	51	16	0.49	11	16	7	177.28	244.27	2.97	2.45	0.99	-1.98	1.3	1.15	-5.35	0.00324	4.51e-06	Moderately soluble	-7.22	4.3e-05	5.98e-08	Poorly soluble	-3.33	0.335	0.000467	Soluble	Low	No	Yes	No	No	No	No	No	-8.94	3	3	2	1	4	0.17	0	1	2	7.39
GSK-161	Oc1ccc(cc1)c1oc2cc(O[C@@H]3O[C@@H](C)[C@@H]([C@H]([C@H]3O)O)O)cc(c2c(=O)c1O[C@@H]1O[C@@H](C)[C@@H]([C@H]([C@H]1O)O[C@@H]1OC[C@H]([C@@H]([C@H]1O)O)O)OC(=O)C)O	C34H40O19	752.67	53	16	0.53	9	19	9	174.08	293.96	2.82	-1.04	-1.68	-3.85	-2.15	-1.18	-3.48	0.249	0.000331	Soluble	-4.65	0.017	2.26e-05	Moderately soluble	-0.66	164	0.218	Soluble	Low	No	Yes	No	No	No	No	No	-11.63	3	4	1	1	4	0.17	0	0	2	7.56
GSK-162	COc1ccc(cc1)c1oc2c(CC=C(C)C)c(O)cc(c2c(=O)c1O)O	C21H20O6	368.38	27	16	0.19	4	6	3	104.2	100.13	3.26	4.77	4.09	1.31	4.28	3.54	-5.3	0.00183	4.97e-06	Moderately soluble	-6.6	9.17e-05	2.49e-07	Poorly soluble	-5.75	0.000658	1.79e-06	Moderately soluble	High	No	No	No	No	Yes	No	No	-5.16	0	0	0	0	0	0.55	0	1	2	3.79
GSK-163	OC[C@H]([C@H]([C@@H]([C@@H](CO)O)O)O)O	C6H14O6	182.17	12	0	1	5	6	6	37.93	121.38	0.23	-3.1	-3.59	-2.77	-1.91	-2.23	1.31	3750	20.6	Highly soluble	1.12	2380	13.1	Highly soluble	2.57	67100	368	Soluble	Low	No	No	No	No	No	No	No	-9.61	1	2	0	0	3	0.55	0	0	1	3.3
GSK-164	CCCCCCCCCCCCCCCCCCCC(=O)O	C20H40O2	312.53	22	0	0.95	18	2	1	100.03	37.3	4.56	9.29	7.11	5.13	7.01	6.62	-6.44	0.000113	3.61e-07	Poorly soluble	-9.97	3.31e-08	1.06e-10	Poorly soluble	-6.91	3.84e-05	1.23e-07	Poorly soluble	Low	No	No	Yes	No	No	No	No	-1.61	1	1	1	1	2	0.85	0	0	2	2.77
GSK-165	CCCCC/C=C\C/C=C\CCCCCCCC(=O)O	C18H32O2	280.45	20	0	0.72	14	2	1	89.46	37.3	4.14	6.98	5.88	4.47	5.77	5.45	-5.05	0.00249	8.87e-06	Moderately soluble	-7.58	7.42e-06	2.64e-08	Poorly soluble	-4.67	0.00593	2.11e-05	Moderately soluble	High	Yes	No	Yes	No	Yes	No	No	-3.05	1	1	1	1	1	0.85	0	1	2	3.1
GSK-166	OC(=O)CCC(=O)O	C4H6O4	118.09	8	0	0.5	3	4	2	24.89	74.6	0.32	-0.59	-0.06	-0.54	-0.63	-0.3	0	117	0.994	Very soluble	-0.51	36.9	0.312	Very soluble	0.61	486	4.11	Soluble	High	No	No	No	No	No	No	No	-7.44	0	3	0	0	2	0.85	0	0	1	1.29
GSK-167	COc1cc(/C=C/C(=O)O)ccc1O	C10H10O4	194.18	14	6	0.1	3	4	2	51.63	66.76	1.62	1.51	1.39	1	1.26	1.36	-2.11	1.49	0.00768	Soluble	-2.52	0.586	0.00302	Soluble	-1.42	7.43	0.0383	Soluble	High	Yes	No	No	No	No	No	No	-6.41	0	0	0	0	1	0.85	0	1	1	1.93
GSK-168	OC(=O)/C=C\c1ccc(c(c1)O)O	C9H8O4	180.16	13	6	0	2	4	3	47.16	77.76	0.97	1.15	1.09	0.7	0.75	0.93	-1.89	2.32	0.0129	Very soluble	-2.38	0.755	0.00419	Soluble	-0.71	35.1	0.195	Soluble	High	No	No	No	No	No	No	No	-6.58	0	0	0	0	1	0.56	1	2	1	1.81
GSK-169	CC[C@@H](C(C)C)/C=C/[C@H]([C@H]1CC[C@@H]2[C@]1(C)CC[C@H]1[C@H]2CC=C2[C@]1(C)CC[C@@H](C2)O)C	C29H48O	412.69	30	0	0.86	5	1	1	132.75	20.23	5.08	8.56	7.8	6.62	6.86	6.98	-7.46	1.43e-05	3.46e-08	Poorly soluble	-8.86	5.71e-07	1.38e-09	Poorly soluble	-5.47	0.0014	3.39e-06	Moderately soluble	Low	No	No	No	No	Yes	No	No	-2.74	1	3	0	1	2	0.55	0	1	2	6.21
GSK-170	OC[C@H]1O[C@@]([C@H]([C@@H]1O)O)(CO)O[C@H]1O[C@H](CO[C@H]2O[C@H](CO[C@H]3O[C@H](CO)[C@@H]([C@@H]([C@H]3O)O)O)[C@@H]([C@@H]([C@H]2O)O)O)[C@H]([C@@H]([C@H]1O)O)O	C24H42O21	666.58	45	0	1	11	21	14	132.92	347.83	-0.09	-7.99	-9.75	-8.43	-8.01	-6.85	1.79	40800	61.2	Highly soluble	1.44	18200	27.3	Highly soluble	7.24	11700000000	17500000	Soluble	Low	No	Yes	No	No	No	No	No	-16.04	3	4	2	1	5	0.17	0	0	2	7.32
GSK-171	OCc1ccc(o1)C=O	C6H6O3	126.11	9	5	0.17	2	3	1	30.22	50.44	0.91	-0.58	0.43	-1.06	1.24	0.19	-0.54	36.7	0.291	Very soluble	-0.01	124	0.98	Very soluble	-1.35	5.67	0.045	Soluble	High	No	No	No	No	No	No	No	-7.48	0	3	0	0	1	0.55	0	1	1	2.25
GSK-172	OC[C@H]1O[C@@]([C@H]([C@@H]1O)O)(CO)O[C@H]1O[C@H](CO[C@H]2O[C@H](CO)[C@@H]([C@@H]([C@H]2O)O)O)[C@H]([C@@H]([C@H]1O)O)O	C18H32O16	504.44	34	0	1	8	16	11	100.54	268.68	1.12	-5.85	-7.57	-6.15	-5.93	-4.88	1.25	8890	17.6	Highly soluble	0.88	3800	7.53	Highly soluble	5.43	135000000	268000	Soluble	Low	No	Yes	No	No	No	No	No	-13.53	3	2	1	1	4	0.17	0	0	2	6.28
GSK-173	OC[C@H]1O[C@@]([C@H]([C@@H]1O)O)(CO)O[C@H]1O[C@H](CO)[C@H]([C@@H]([C@H]1O)O)O	C12H22O11	342.3	23	0	1	5	11	8	68.16	189.53	0.85	-3.7	-5.4	-4.37	-3.86	-3.29	0.7	1710	5	Highly soluble	0.31	696	2.03	Highly soluble	3.67	1620000	4730	Soluble	Low	No	Yes	No	No	No	No	No	-11.02	2	1	1	1	4	0.17	0	0	0	5.16
GSK-174	CCCCCCCCCCCCCCC(=O)O	C15H30O2	242.4	17	0	0.93	13	2	1	75.99	37.3	3.66	6.63	5.16	3.94	4.81	4.84	-4.66	0.00528	2.18e-05	Moderately soluble	-7.21	1.48e-05	6.1e-08	Poorly soluble	-4.91	0.00298	1.23e-05	Moderately soluble	High	Yes	No	Yes	No	Yes	No	No	-3.07	0	0	1	0	1	0.85	0	0	3	2.2
GSK-175	OC[C@H]1O[C@@H](O[C@H]2OC=C[C@H]3[C@@H]2[C@](C)(O)C[C@@H]3O)[C@@H]([C@H]([C@@H]1O)O)O	C15H24O9	348.35	24	0	0.87	3	9	6	77.67	149.07	1.26	-2.19	-2.58	-2.59	-2.66	-1.75	-0.42	132	0.378	Very soluble	-0.41	136	0.39	Very soluble	2.54	121000	348	Soluble	Low	No	Yes	No	No	No	No	No	-9.98	1	1	1	1	2	0.55	0	0	0	5.74
GSK-176	CCCCCCCCCCCCCCCCC(=O)O	C17H34O2	270.45	19	0	0.94	15	2	1	85.6	37.3	4.11	7.69	5.94	4.44	5.69	5.57	-5.37	0.00115	4.25e-06	Moderately soluble	-8.31	1.31e-06	4.85e-09	Poorly soluble	-5.71	0.000524	1.94e-06	Moderately soluble	High	Yes	No	Yes	No	Yes	No	No	-2.49	1	1	1	1	1	0.85	0	0	2	2.42
GSK-177	CCCCCCCCCCC/C=C/C=C/C(=O)OC	C17H30O2	266.42	19	0	0.71	13	2	0	84.17	26.3	4.54	6.89	5.19	4.23	5.48	5.27	-4.97	0.00283	1.06e-05	Moderately soluble	-7.25	1.49e-05	5.58e-08	Poorly soluble	-4.57	0.00712	2.67e-05	Moderately soluble	High	Yes	No	Yes	No	Yes	No	No	-3.03	1	0	1	0	1	0.55	0	2	2	3.7
GSK-178	CCCCCC/C=C\CCCCCCCC(=O)O	C16H30O2	254.41	18	0	0.81	13	2	1	80.32	37.3	3.53	6.58	5.33	4.09	5.07	4.92	-4.7	0.00502	1.97e-05	Moderately soluble	-7.16	1.75e-05	6.88e-08	Poorly soluble	-4.59	0.00649	2.55e-05	Moderately soluble	High	Yes	No	Yes	No	Yes	No	No	-3.18	0	0	1	0	1	0.85	0	1	2	2.84
GSK-179	OCc1ccc(o1)C(=O)O	C6H6O4	142.11	10	5	0.17	2	4	2	31.8	70.67	0.81	0	0.32	-0.83	0.49	0.16	-0.96	15.6	0.11	Very soluble	-1.04	13.1	0.0922	Very soluble	-0.79	23.1	0.163	Soluble	High	No	No	No	No	No	No	No	-7.17	0	3	0	0	1	0.85	0	0	1	2.27
GSK-180	CC(=O)CCC1=C(C)CCCC1(C)C	C13H22O	194.31	14	0	0.77	3	1	0	61.96	17.07	2.75	2.72	3.88	3.04	3.98	3.28	-2.56	0.535	0.00275	Soluble	-2.73	0.36	0.00185	Soluble	-3.82	0.0296	0.000152	Soluble	High	Yes	No	No	No	No	No	No	-5.55	0	0	0	0	2	0.55	0	1	1	3.1
GSK-181	O=C1CC[C@H](N1)C(=O)O	C5H7NO3	129.11	9	0	0.6	1	3	2	32.72	66.4	0.5	-0.77	-1.03	-0.93	-0.08	-0.46	-0.09	105	0.814	Very soluble	-0.15	92.1	0.714	Very soluble	-0.04	119	0.923	Soluble	High	No	No	No	No	No	No	No	-7.63	0	4	0	0	1	0.85	0	0	1	1.67
GSK-182	OC[C@H]1O[C@@H](O[C@@H]2OC=C[C@@H]3[C@H]2[C@@]2(CO)O[C@H]2[C@H]3O)[C@@H]([C@H]([C@@H]1O)O)O	C15H22O10	362.33	25	0	0.87	4	10	6	76.64	161.6	1.45	-3.22	-3.59	-2.96	-2.91	-2.25	0.21	582	1.61	Highly soluble	0.4	903	2.49	Highly soluble	3.03	389000	1070	Soluble	Low	No	Yes	No	No	No	No	No	-10.8	1	1	1	1	3	0.55	0	1	1	5.72
GSK-183	OC[C@]12O[C@H]1[C@H]([C@H]1[C@@H]2[C@H](O)OC=C1)O	C9H12O5	200.19	14	0	0.78	1	5	3	44.25	82.45	1.24	-1.62	-1.41	-1.08	-0.75	-0.73	0.01	203	1.01	Highly soluble	0.4	501	2.5	Highly soluble	1.38	4750	23.7	Soluble	High	No	Yes	No	No	No	No	No	-8.67	0	1	0	0	0	0.55	0	1	1	4.64
GSK-184	OC[C@H]1O[C@@H](O[C@@H]2OC=C([C@@H]3[C@H]2[C@H](C)[C@H](C3)O)C(=O)O)[C@@H]([C@H]([C@@H]1O)O)O	C16H24O10	376.36	26	0	0.81	4	10	6	83.05	166.14	1.44	-1.71	-2.24	-2	-2.72	-1.45	-0.83	55.4	0.147	Very soluble	-1.27	20.4	0.0542	Very soluble	2.61	154000	410	Soluble	Low	No	Yes	No	No	No	No	No	-9.81	1	1	1	1	2	0.11	0	0	1	5.69
GSK-185	O=C(O[C@@H]1[C@@H](CO[C@@H]2O[C@@H](C)[C@@H]([C@H]([C@H]2O)O)O)O[C@H]([C@@H]([C@H]1O)O)OCCc1ccc(c(c1)O)O)/C=C/c1ccc(c(c1)O)O	C29H36O15	624.59	44	12	0.48	11	15	9	148.42	245.29	2.49	-0.5	-1.12	-2.37	-1.14	-0.53	-2.87	0.836	0.00134	Soluble	-4.18	0.0409	6.55e-05	Moderately soluble	-0.22	377	0.604	Soluble	Low	No	Yes	No	No	No	No	No	-10.46	3	4	2	1	4	0.17	1	2	2	6.37
GSK-186	OC[C@H]1O[C@@H](OCCc2ccc(c(c2)O)O)[C@@H]([C@H]([C@@H]1OC(=O)/C=C/c1ccc(c(c1)O)O)O[C@@H]1O[C@@H](C)[C@@H]([C@H]([C@H]1O)O)O)O	C29H36O15	624.59	44	12	0.48	11	15	9	148.42	245.29	2.15	-0.5	-1.12	-2.37	-1.14	-0.6	-2.87	0.836	0.00134	Soluble	-4.18	0.0409	6.55e-05	Moderately soluble	-0.22	377	0.604	Soluble	Low	No	Yes	No	No	No	No	No	-10.46	3	4	2	1	4	0.17	1	2	2	6.37
GSK-187	CCCCCCCCCCCCCCCCCCCCCCCCCC(=O)OCCc1ccc(cc1)O	C34H60O3	516.84	37	6	0.79	28	3	1	164.5	46.53	7.27	14.46	10.86	7.04	11.91	10.31	-10.43	1.94e-08	3.75e-11	Insoluble	-15.53	1.51e-13	2.93e-16	Insoluble	-12.22	3.09e-10	5.97e-13	Insoluble	Low	No	Yes	No	No	No	No	No	0.81	2	4	1	1	2	0.17	0	0	3	4.43
GSK-188	OC(=O)/C=C(/C=C/[C@]1(O)C(C)(C)CCC[C@@]1(C)O)\C	C15H24O4	268.35	19	0	0.67	3	4	3	75.07	77.76	2.3	2.09	2.27	1.62	2.33	2.12	-2.62	0.64	0.00239	Soluble	-3.35	0.119	0.000444	Soluble	-1.47	9.16	0.0341	Soluble	High	No	No	No	No	No	No	No	-6.45	0	0	0	0	0	0.56	0	2	0	4.28
GSK-189	OC[C@]1(O)O[C@H](O[C@H]2OC=C[C@H]3[C@@H]2[C@@](C)(O)CC3)[C@@H]([C@H]([C@@H]1O)O)O	C15H24O9	348.35	24	0	0.87	3	9	6	77.7	149.07	2.16	-1.98	-2.23	-2.19	-2.26	-1.3	-0.55	97.2	0.279	Very soluble	-0.63	82.2	0.236	Very soluble	2.09	43100	124	Soluble	Low	No	Yes	No	No	No	No	No	-9.83	1	1	1	1	1	0.55	0	0	0	5.63
GSK-190	OC[C@@]1(O)O[C@H](O[C@H]2OC=C[C@@H]3[C@H]2[C@](C)(CC3)OC(=O)C)[C@@H]([C@H]([C@@H]1O)O)O	C17H26O10	390.38	27	0	0.82	5	10	5	87.44	155.14	1.24	-1.41	-1.66	-1.35	-1.79	-1	-1.04	35.4	0.0908	Very soluble	-1.35	17.6	0.0451	Very soluble	1.47	11600	29.6	Soluble	Low	No	Yes	No	No	No	No	No	-9.68	0	1	1	1	1	0.55	0	0	1	5.62
GSK-191	CC(=O)O[C@@]1(C)CC[C@H]2[C@@H]1[C@@H](O)OC=C2	C11H16O4	212.24	15	0	0.73	2	4	1	53.86	55.76	2.45	0.96	1.2	1.05	0.73	1.28	-1.63	4.99	0.0235	Very soluble	-1.72	4.06	0.0191	Very soluble	-0.56	58.1	0.274	Soluble	High	Yes	No	No	No	No	No	No	-6.91	0	0	0	0	0	0.55	0	0	1	4.19
GSK-192	OC[C@H]1O[C@@H](NC(=O)[C@H](CO)N)[C@@H]([C@H]([C@H]1O)O)O	C9H18N2O7	266.25	18	0	0.89	5	8	7	55.87	165.5	0.18	-3.6	-4.78	-3.85	-3.46	-3.1	1.11	3410	12.8	Highly soluble	0.71	1360	5.12	Highly soluble	2.52	87600	329	Soluble	Low	No	Yes	No	No	No	No	No	-10.48	1	1	1	1	3	0.55	0	0	0	4.22
GSK-193	OC[C@H]1O[C@@H](OC[C@H]2O[C@H](OCCc3ccc(c(c3)OC)O)[C@@H]([C@@H]([C@H]2OC(=O)/C=C/c2ccc(c(c2)O)O)O)O)[C@@H]([C@H]([C@@H]1O)O[C@@H]1O[C@@H](C)[C@@H]([C@H]([C@H]1O)O)O)O	C36H48O20	800.75	56	12	0.58	15	20	11	185.28	313.44	2.85	-1.77	-3	-4.29	-2.63	-1.77	-2.86	1.11	0.00139	Soluble	-4.3	0.0404	5.05e-05	Moderately soluble	0.95	7090	8.85	Soluble	Low	No	No	No	No	No	No	No	-12.44	3	4	2	1	4	0.17	1	2	2	7.61
GSK-194	OC[C@H]1O[C@@H](O)[C@@H]([C@H]([C@@H]1OC(=O)/C=C\c1ccc(c(c1)O)O)O[C@@H]1O[C@@H](C)[C@@H]([C@H]([C@H]1O)O)O)O	C21H28O13	488.44	34	6	0.57	7	13	8	110.35	215.83	0.46	-2.29	-2.8	-2.84	-2.62	-2.02	-1.09	39.3	0.0805	Very soluble	-1.71	9.58	0.0196	Very soluble	2.1	61900	127	Soluble	Low	No	No	No	No	No	No	No	-10.91	2	2	1	1	4	0.17	1	2	1	5.61
GSK-195	CCCCCC[C@H]1C[C@H]1CCCCCCCC(=O)OC	C18H34O2	282.46	20	0	0.94	14	2	0	87.81	26.3	4.41	7.32	5.5	4.28	5.73	5.45	-5.28	0.00149	5.26e-06	Moderately soluble	-7.7	5.64e-06	2e-08	Poorly soluble	-5.57	0.000767	2.72e-06	Moderately soluble	High	Yes	No	Yes	No	Yes	No	No	-2.83	1	0	1	0	1	0.55	0	0	2	3.35
GSK-196	OCC1=C[C@H]([C@]2([C@@H]1[C@@H](OC=C2)O[C@@H]1O[C@H](CO)[C@H]([C@H]([C@H]1O)O)O)O)O	C15H22O10	362.33	25	0	0.73	4	10	7	78.35	169.3	1.79	-4.1	-3.69	-3.47	-3.27	-2.55	0.76	2090	5.76	Highly soluble	1.15	5100	14.1	Highly soluble	3.13	485000	1340	Soluble	Low	No	Yes	No	No	No	No	No	-11.42	1	1	1	1	3	0.55	0	1	1	5.83
GSK-197	OCC1=C[C@H]([C@]2([C@@H]1[C@H](O)OC=C2)O)O	C9H12O5	200.19	14	0	0.56	1	5	4	45.97	90.15	-0.51	-2.51	-1.51	-1.19	-1.16	-1.38	0.57	737	3.68	Highly soluble	1.16	2900	14.5	Highly soluble	1.47	5920	29.6	Soluble	High	No	Yes	No	No	No	No	No	-9.3	0	1	0	0	1	0.55	0	1	1	4.66
GSK-198	OC[C@H]1O[C@@H](O[C@@H]2OCC[C@@H]3[C@H]2[C@@]2(CO)O[C@H]2[C@H]3O)[C@@H]([C@H]([C@@H]1O)O)O	C15H24O10	364.35	25	0	1	4	10	6	77.11	161.6	1.17	-3.34	-3.71	-2.81	-2.5	-2.24	0.27	677	1.86	Highly soluble	0.52	1210	3.32	Highly soluble	2.56	134000	367	Soluble	Low	No	Yes	No	No	No	No	No	-10.89	1	1	1	1	3	0.55	0	1	1	5.39
GSK-199	OCC1=CC[C@H]2[C@@H]1[C@@H](OC=C2C(=O)CO)O[C@@H]1O[C@H](CO)[C@H]([C@@H]([C@H]1O)O)O	C17H24O10	388.37	27	0	0.71	6	10	6	86.97	166.14	2.28	-3.16	-2.84	-2.67	-2.06	-1.69	0.14	535	1.38	Highly soluble	0.24	673	1.73	Highly soluble	1.99	37900	97.5	Soluble	Low	No	No	No	No	No	No	No	-10.91	1	1	1	1	3	0.11	0	1	1	5.86
GSK-200	OCC1=CC[C@H]2[C@@H]1[C@H](O)OC=C2C(=O)CO	C11H14O5	226.23	16	0	0.55	3	5	3	54.59	86.99	1.61	-1.57	-0.66	-0.69	-0.03	-0.27	-0.06	199	0.88	Very soluble	0.25	403	1.78	Highly soluble	0.31	462	2.04	Soluble	High	No	No	No	No	No	No	No	-8.79	0	1	0	0	0	0.56	0	1	1	4.54
GSK-201	OC[C@H]1O[C@@H](O[C@@H]2O[C@H]3OC[C@]4([C@@H]2[C@@H](C3)[C@@H]([C@H]4Cl)O)O)[C@@H]([C@H]([C@@H]1O)O)O	C15H23ClO10	398.79	26	0	1	3	10	6	81.91	158.3	1.84	-2.59	-3.15	-2.56	-2.66	-1.83	-0.48	131	0.329	Very soluble	-0.19	259	0.649	Very soluble	2.33	85700	215	Soluble	Low	No	Yes	No	No	No	No	No	-10.57	1	1	1	1	3	0.55	0	1	1	6.15
GSK-202	OCC[C@@H]1c2cocc2[C@H]([C@H]1O)O	C9H12O4	184.19	13	5	0.56	2	4	3	44.43	73.83	0.74	-0.98	-0.17	-0.82	0.41	-0.16	-0.52	56	0.304	Very soluble	-0.08	152	0.823	Very soluble	-0.83	26.9	0.146	Soluble	High	No	No	No	No	No	No	No	-8.12	0	0	0	0	1	0.55	0	0	1	3.84
GSK-203	CO[C@H]1O[C@H]2OC[C@]3([C@@H]2[C@H](C1)[C@H](O)[C@@H]3Cl)O	C10H15ClO5	250.68	16	0	1	1	5	2	54.25	68.15	1.16	-0.46	-0.32	-0.34	0	0.01	-1.04	22.9	0.0915	Very soluble	-0.51	78.4	0.313	Very soluble	-0.06	220	0.879	Soluble	High	No	Yes	No	No	No	No	No	-8.16	0	0	0	0	0	0.55	0	1	0	4.69
GSK-204	CO[C@@H]1O[C@H]2OC[C@]3([C@@H]2[C@H](C1)[C@H](O)[C@@H]3Cl)O	C10H15ClO5	250.68	16	0	1	1	5	2	54.25	68.15	1.38	-0.46	-0.32	-0.34	0	0.05	-1.04	22.9	0.0915	Very soluble	-0.51	78.4	0.313	Very soluble	-0.06	220	0.879	Soluble	High	No	Yes	No	No	No	No	No	-8.16	0	0	0	0	0	0.55	0	1	0	4.69
GSK-205	CO[C@H]1O[C@H]2OC[C@]3([C@@H]2[C@H](C1)[C@H](O)[C@@H]3O)O	C10H16O6	232.23	16	0	1	1	6	3	50.62	88.38	1.21	-1.73	-1.57	-1.04	-1.12	-0.85	-0.12	175	0.752	Very soluble	0.39	567	2.44	Highly soluble	1.13	3150	13.6	Soluble	High	No	Yes	No	No	No	No	No	-8.94	0	1	0	0	0	0.55	0	0	1	4.56
GSK-206	CO[C@H]1O[C@H](OC)C[C@H]2[C@@H]1[C@]1(CO)O[C@@H]1[C@@H]2O	C11H18O6	246.26	17	0	1	3	6	2	55.35	80.68	2.06	-1.2	-0.91	-1.15	-0.26	-0.29	-0.41	95.2	0.387	Very soluble	0	246	0.999	Very soluble	0.31	498	2.02	Soluble	High	No	Yes	No	No	No	No	No	-8.65	0	1	0	0	0	0.55	0	1	1	4.64
GSK-207	CO[C@H]1O[C@@H](OC)C[C@H]2[C@@H]1[C@@](C)(O)C[C@@H]2O	C11H20O5	232.27	16	0	1	2	5	2	56.38	68.15	2.11	-0.16	0.1	-0.34	-0.04	0.33	-1.05	20.8	0.0897	Very soluble	-0.82	35.5	0.153	Very soluble	-0.17	155	0.668	Soluble	High	No	No	No	No	No	No	No	-7.83	0	0	0	0	0	0.55	0	0	1	4.6
GSK-208	O=C1OC[C@@H]2[C@H](C1)[C@H](O)C[C@]2(C)O	C9H14O4	186.21	13	0	0.89	0	4	2	44.8	66.76	1.29	-0.58	-0.32	0.15	0.46	0.2	-0.63	43.7	0.235	Very soluble	-0.35	82.9	0.445	Very soluble	-0.26	102	0.546	Soluble	High	No	No	No	No	No	No	No	-7.85	0	0	0	0	1	0.55	0	0	1	3.46
GSK-209	OC[C@]12O[C@@H]2[C@H]([C@H]2[C@@H]1[C@@H](OC=C2)O[C@@H]1O[C@@H](C)[C@@H]([C@H]([C@H]1O)O)O)O	C15H22O9	346.33	24	0	0.87	3	9	5	75.48	141.37	1.98	-2.72	-2.56	-2.19	-2.31	-1.56	-0.08	291	0.84	Very soluble	0.3	695	2.01	Highly soluble	2.46	101000	290	Soluble	Low	No	Yes	No	No	No	No	No	-10.34	0	1	1	1	1	0.55	0	1	0	5.69
GSK-210	COC(=O)C1=CO[C@H]([C@H]2[C@@H]1CCC2=C)O[C@@H]1O[C@H](CO[C@@H]2O[C@H](C)[C@H]([C@H]([C@H]2O)O)O)[C@H]([C@@H]([C@H]1O)O)O	C23H34O13	518.51	36	0	0.78	7	13	6	116.95	193.83	3.06	-2.5	-2.35	-2.77	-2.5	-1.41	-1.02	49.8	0.096	Very soluble	-1.03	48.7	0.0939	Very soluble	2.06	59900	116	Soluble	Low	No	No	No	No	No	No	No	-11.24	3	2	1	1	4	0.11	0	1	1	6.75
GSK-211	COC(=O)C1=CO[C@H]([C@H]2[C@@H]1CCC2=C)O	C11H14O4	210.23	15	0	0.55	2	4	1	53.35	55.76	2.18	0.74	0.97	0.95	1.01	1.17	-1.48	7	0.0333	Very soluble	-1.49	6.8	0.0324	Very soluble	-0.79	33.9	0.161	Soluble	High	Yes	No	No	No	No	No	No	-7.06	0	0	0	0	0	0.85	0	1	1	4.27
GSK-212	OC[C@@H]1O[C@H](OC[C@H]2O[C@@H](OCCc3ccc(c(c3)O)O)[C@@H]([C@@H]([C@@H]2OC(=O)/C=C\c2ccc(c(c2)OC)O)O[C@H]2O[C@@H](C)[C@@H]([C@H]([C@@H]2O)O)O)O)[C@H]([C@H]([C@@H]1O)O)O	C36H48O20	800.75	56	12	0.58	15	20	11	185.28	313.44	3.12	-1.77	-3	-4.29	-2.63	-1.71	-2.86	1.11	0.00139	Soluble	-4.3	0.0404	5.05e-05	Moderately soluble	0.95	7090	8.85	Soluble	Low	No	No	No	No	No	No	No	-12.44	3	4	2	1	4	0.17	1	2	2	7.6
GSK-213	OC[C@@H]1O[C@H](OC[C@H]2O[C@@H](OCCc3ccc(c(c3)O)OC)[C@@H]([C@H]([C@@H]2OC(=O)/C=C\c2ccc(c(c2)OC)O)O[C@H]2O[C@@H](C)[C@@H]([C@H]([C@@H]2O)O)O)O)[C@H]([C@H]([C@H]1O)O)O	C37H50O20	814.78	57	12	0.59	16	20	10	189.74	302.44	3.78	-1.45	-2.69	-4.11	-2.07	-1.31	-3.08	0.681	0.000836	Soluble	-4.4	0.0326	4e-05	Moderately soluble	0.27	1510	1.85	Soluble	Low	No	Yes	No	No	No	No	No	-12.3	3	4	2	1	5	0.17	0	1	2	7.72
GSK-214	OC[C@H]1O[C@@H](O[C@@H]2OC=C[C@@]3([C@H]2C(=C[C@H]3O)CO)O[C@@H]2O[C@H](CO)[C@H]([C@@H]([C@H]2O)O)O)[C@@H]([C@H]([C@@H]1O)O)O	C21H32O15	524.47	36	0	0.81	7	15	10	110.74	248.45	1.58	-5.7	-5.86	-5.4	-5.36	-4.15	0.96	4800	9.15	Highly soluble	1.15	7340	14	Highly soluble	4.89	40600000	77400	Soluble	Low	No	Yes	No	No	No	No	No	-13.55	3	2	1	1	4	0.17	0	1	1	6.84
GSK-215	CCCCCC/C=C\CCCCCCCC(=O)OC	C17H32O2	268.43	19	0	0.82	14	2	0	84.64	26.3	4.53	6.37	5.42	4.33	5.66	5.26	-4.59	0.00685	2.55e-05	Moderately soluble	-6.71	5.19e-05	1.93e-07	Poorly soluble	-5.29	0.00137	5.11e-06	Moderately soluble	High	Yes	No	Yes	No	No	No	No	-3.41	1	0	1	0	1	0.55	0	1	2	2.93
GSK-216	OC[C@@H]1O[C@H](O[C@@H]2OC=C[C@@H]3[C@H]2[C@@](C)(O)C[C@H]3OC(=O)/C=C\c2ccc(c(c2)OC)O)[C@H]([C@@H]([C@H]1O)O)O	C25H32O12	524.51	37	6	0.56	8	12	6	125.53	184.6	2.59	0.09	-0.71	-1.32	-0.9	-0.05	-2.74	0.953	0.00182	Soluble	-3.52	0.158	0.000301	Soluble	0.29	1010	1.93	Soluble	Low	No	Yes	No	No	No	No	No	-9.44	3	2	1	1	3	0.17	0	1	2	6.25
GSK-217	CCC[C@H](CCC[C@H](CCCC(C(=O)O)(C)C)C)C	C17H34O2	270.45	19	0	0.94	11	2	1	85.34	37.3	3.74	6.93	5.51	4.44	5.02	5.13	-5.16	0.00189	6.97e-06	Moderately soluble	-7.53	8.06e-06	2.98e-08	Poorly soluble	-4.57	0.00721	2.67e-05	Moderately soluble	High	Yes	Yes	No	No	Yes	No	No	-3.03	1	0	1	0	1	0.85	0	0	2	3.14
GSK-218	OC[C@@H]1O[C@H](OC[C@H]2O[C@@H](OCCc3ccc(c(c3)O)O)[C@@H]([C@H]([C@@H]2OC(=O)/C=C\c2ccc(c(c2)O)O)O[C@H]2O[C@@H](C)[C@@H]([C@H]([C@@H]2O)O)O)O)[C@H]([C@H]([C@H]1O)O)O	C35H46O20	786.73	55	12	0.57	14	20	12	180.81	324.44	2.48	-2.1	-3.3	-4.47	-3.2	-2.12	-2.63	1.84	0.00233	Soluble	-4.19	0.0514	6.53e-05	Moderately soluble	1.63	33300	42.4	Soluble	Low	No	No	No	No	No	No	No	-12.59	3	4	2	1	5	0.17	1	2	2	7.49
GSK-219	O[C@H]1O[C@@H]2OC[C@]3([C@@H]2[C@@H](C1)[C@H](O)[C@H]3Cl)O	C9H13ClO5	236.65	15	0	1	0	5	3	49.52	79.15	1	-0.99	-0.97	-0.63	-0.47	-0.41	-0.68	49	0.207	Very soluble	-0.19	154	0.652	Very soluble	0.65	1040	4.42	Soluble	High	No	Yes	No	No	No	No	No	-8.45	0	1	0	0	0	0.55	0	1	1	4.62
GSK-220	OCC1=C[C@H]([C@H]2[C@]1(CO)OC(=O)C2)O	C9H12O5	200.19	14	0	0.67	2	5	3	45.48	86.99	0.98	-2.5	-1.43	-0.78	-0.08	-0.76	0.63	846	4.23	Highly soluble	1.22	3290	16.5	Highly soluble	0.18	305	1.52	Soluble	High	No	No	No	No	No	No	No	-9.3	0	1	0	0	1	0.55	0	1	1	3.99
GSK-221	OC[C@H]1O[C@@H](O[C@]2(C)CCCC([C@]2(O)/C=C/[C@@H](O)C)(C)C)[C@@H]([C@H]([C@@H]1O)O)O	C19H34O8	390.47	27	0	0.89	5	8	6	97.7	139.84	2.58	-0.57	-0.56	-0.85	0.26	0.17	-1.57	10.5	0.0268	Very soluble	-1.9	4.96	0.0127	Very soluble	0.2	616	1.58	Soluble	Low	No	Yes	No	No	No	No	No	-9.09	1	1	0	1	1	0.55	0	1	1	5.98
GSK-222	OC[C@H]1O[C@@H](O[C@]2(C)CCCC([C@]2(O)/C=C/[C@H](O)C)(C)C)[C@@H]([C@H]([C@@H]1O)O)O	C19H34O8	390.47	27	0	0.89	5	8	6	97.7	139.84	2.37	-0.57	-0.56	-0.85	0.26	0.13	-1.57	10.5	0.0268	Very soluble	-1.9	4.96	0.0127	Very soluble	0.2	616	1.58	Soluble	Low	No	Yes	No	No	No	No	No	-9.09	1	1	0	1	1	0.55	0	1	1	5.98
GSK-223	OC[C@H]1O[C@@H](O[C@]2(C)CCCC([C@]2(O)/C=C/C(=O)C)(C)C)[C@@H]([C@H]([C@@H]1O)O)O	C19H32O8	388.45	27	0	0.84	5	8	5	96.74	136.68	1.85	-0.62	-0.35	-0.96	0.59	0.1	-1.53	11.5	0.0297	Very soluble	-1.78	6.47	0.0167	Very soluble	-0.28	204	0.526	Soluble	High	No	Yes	No	No	No	No	No	-9.11	0	0	0	1	0	0.55	0	1	1	5.75
GSK-224	OC[C@H]1O[C@@H](O[C@H]2[C@@H]3C=CO[C@H]([C@@H]3[C@]3([C@@H]2O3)CO)O[C@@H]2O[C@H](CO)[C@H]([C@H]([C@H]2O)O)O)[C@@H]([C@H]([C@H]1O)O)O	C21H32O15	524.47	36	0	0.9	7	15	9	109.02	240.75	0.83	-4.81	-5.77	-4.88	-5.02	-3.93	0.4	1320	2.52	Highly soluble	0.38	1270	2.42	Highly soluble	4.79	32600000	62100	Soluble	Low	No	Yes	No	No	No	No	No	-12.91	3	2	1	1	4	0.17	0	1	1	6.83
GSK-225	OC[C@H]1O[C@@H](O[C@@H]2C[C@]([C@@H]3[C@H]2C=CO[C@H]3O[C@@H]2O[C@H](CO)[C@H]([C@H]([C@H]2O)O)O)(C)O)[C@@H]([C@H]([C@H]1O)O)O	C21H34O14	510.49	35	0	0.9	6	14	9	110.05	228.22	1.93	-3.78	-4.75	-4.15	-4.75	-3.1	-0.23	302	0.592	Very soluble	-0.42	193	0.379	Very soluble	4.3	10100000	19800	Soluble	Low	No	Yes	No	No	No	No	No	-12.1	3	2	1	1	4	0.17	0	0	1	6.85
GSK-226	OC[C@H]1O[C@@H](O[C@@H]2OC=C[C@@H]3[C@H]2[C@@](C)(O)C[C@H]3OC(=O)c2ccc(cc2)O)[C@@H]([C@H]([C@@H]1O)O)O	C22H28O11	468.45	33	6	0.59	6	11	6	109.33	175.37	1.22	-0.31	-1.01	-1.12	-1.6	-0.56	-2.29	2.42	0.00516	Soluble	-2.91	0.573	0.00122	Soluble	0.44	1290	2.76	Soluble	Low	No	No	No	No	No	No	No	-9.38	2	1	1	1	3	0.17	0	0	1	5.81
GSK-227	OC[C@H]1O[C@@H](O[C@@H]2CCC(C(=C2C)C(=O)O)(C)C)[C@@H]([C@H]([C@@H]1O)O)O	C16H26O8	346.37	24	0	0.81	4	8	5	82.65	136.68	2.16	-0.58	-0.61	-0.86	-0.55	-0.09	-1.36	15.2	0.0438	Very soluble	-1.82	5.25	0.0151	Very soluble	0.4	878	2.54	Soluble	Low	No	Yes	No	No	No	No	No	-8.82	0	1	0	1	0	0.56	0	0	0	5.37
GSK-228	OC[C@H]1O[C@H](OC[C@H]2O[C@@H](O[C@@H]3OC=C[C@@H]4[C@H]3[C@@]3(CO)O[C@H]3[C@H]4O)[C@@H]([C@H]([C@@H]2O)O)O)[C@@H]([C@H]([C@H]1O)O)O	C21H32O15	524.47	36	0	0.9	7	15	9	109.02	240.75	1.5	-5.36	-5.77	-4.88	-5.02	-3.91	0.75	2930	5.59	Highly soluble	0.96	4730	9.02	Highly soluble	4.79	32600000	62100	Soluble	Low	No	Yes	No	No	No	No	No	-13.3	3	2	1	1	4	0.17	0	1	1	6.77
GSK-229	O[C@H]1[C@@H]2CCO[C@H]3[C@@H]2[C@]([C@@H]1O)(O)CO3	C9H14O5	202.2	14	0	1	0	5	3	44.73	79.15	1.05	-1.75	-1.54	-0.94	-0.69	-0.77	0.01	206	1.02	Highly soluble	0.6	810	4.01	Highly soluble	1.03	2180	10.8	Soluble	High	No	Yes	No	No	No	No	No	-8.78	0	1	0	0	0	0.55	0	0	1	4.47
GSK-230	O[C@H]1[C@@H]2CCO[C@H]3[C@@H]2[C@]([C@@H]1Cl)(O)CO3	C9H13ClO4	220.65	14	0	1	0	4	2	48.36	58.92	1.42	-0.47	-0.29	0.2	0.43	0.26	-0.91	27	0.122	Very soluble	-0.3	110	0.5	Very soluble	-0.16	152	0.69	Soluble	High	No	Yes	No	No	No	No	No	-7.98	0	0	0	0	0	0.55	0	1	1	4.52
GSK-231	COc1cc(ccc1O)C(=O)O[C@H]1C[C@]([C@@H]2[C@H]1C=CO[C@H]2O[C@@H]1O[C@H](O)[C@H]([C@@H]([C@H]1O)O)O)(C)O	C22H28O12	484.45	34	6	0.59	6	12	6	111.01	184.6	2.58	-0.79	-1.04	-1.2	-1.93	-0.48	-2.08	4.03	0.00831	Soluble	-2.61	1.19	0.00247	Soluble	0.73	2630	5.43	Soluble	Low	No	No	No	No	No	No	No	-9.82	2	2	1	1	3	0.17	0	0	1	5.85
GSK-232	OC[C@@H]1O[C@@H](OC[C@H]2O[C@@H](OCCc3ccc(c(c3)O)O)[C@@H]([C@H]([C@@H]2OC(=O)/C=C\c2ccc(c(c2)O)O)O[C@@H]2O[C@H](C)[C@@H]([C@@H]([C@H]2O)O)O)O)[C@H]([C@@H]([C@@H]1O)O)O	C35H46O20	786.73	55	12	0.57	14	20	12	180.81	324.44	2.18	-2.1	-3.3	-4.47	-3.2	-2.18	-2.63	1.84	0.00233	Soluble	-4.19	0.0514	6.53e-05	Moderately soluble	1.63	33300	42.4	Soluble	Low	No	No	No	No	No	No	No	-12.59	3	4	2	1	5	0.17	1	2	2	7.49
GSK-233	OCC1=C[C@H]([C@H]2[C@@H]1[C@@H](OC=C2)O[C@@H]1O[C@H](CO)[C@H]([C@@H]([C@H]1O)O)O)O	C15H22O9	346.33	24	0	0.73	4	9	6	77.15	149.07	0.56	-3.02	-2.8	-2.7	-2.78	-2.15	0.18	523	1.51	Highly soluble	0.45	981	2.83	Highly soluble	2.76	200000	577	Soluble	Low	No	Yes	No	No	No	No	No	-10.56	1	1	1	1	2	0.55	0	1	0	5.79
GSK-234	OC[C@H]1O[C@@H](O[C@@H]2OC=C[C@@H]3[C@H]2[C@@]2(COC(=O)C)C[C@H]2[C@H]3O)[C@@H]([C@@H]([C@@H]1O)O)O	C18H26O10	402.39	28	0	0.83	6	10	5	89.8	155.14	1.57	-1.72	-2.15	-1.52	-2.07	-1.18	-0.86	56.2	0.14	Very soluble	-1.02	38	0.0946	Very soluble	1.87	30000	74.6	Soluble	Low	No	Yes	No	No	No	No	No	-9.98	0	1	1	1	1	0.55	0	0	1	5.83
GSK-235	CCCCCCCCCCCCCCCCCCCCC(=O)O	C21H42O2	326.56	23	0	0.95	19	2	1	104.83	37.3	4.78	9.83	7.5	5.36	7.45	6.98	-6.8	5.13e-05	1.57e-07	Poorly soluble	-10.54	9.53e-09	2.92e-11	Insoluble	-7.31	1.61e-05	4.93e-08	Poorly soluble	Low	No	No	Yes	No	No	No	No	-1.31	1	1	1	1	2	0.85	0	0	2	2.88
GSK-236	CCCCC[CH][CH]C[CH][CH]C[CH][CH]C[CH][CH]CCCC(=O)O	C20H32O2	304.47	22	0	0.95	18	2	1	91.57	37.3	0	9.29	5.63	5.13	7.01	5.41	-6.39	0.000123	4.05e-07	Poorly soluble	-9.97	3.23e-08	1.06e-10	Poorly soluble	-6.91	3.75e-05	1.23e-07	Poorly soluble	High	Yes	Yes	Yes	No	No	No	No	-1.56	1	1	1	0	2	0.85	0	0	2	2.46
GSK-237	OC(=O)CCC(=O)O	C4H6O4	118.09	8	0	0.5	3	4	2	24.89	74.6	0.32	-0.59	-0.06	-0.54	-0.63	-0.3	0	117	0.994	Very soluble	-0.51	36.9	0.312	Very soluble	0.61	486	4.11	Soluble	High	No	No	No	No	No	No	No	-7.44	0	3	0	0	2	0.85	0	0	1	1.29
GSK-238	CCCCCCCCCCCCCCCCC(=O)O	C17H34O2	270.45	19	0	0.94	15	2	1	85.6	37.3	4.11	7.69	5.94	4.44	5.69	5.57	-5.37	0.00115	4.25e-06	Moderately soluble	-8.31	1.31e-06	4.85e-09	Poorly soluble	-5.71	0.000524	1.94e-06	Moderately soluble	High	Yes	No	Yes	No	Yes	No	No	-2.49	1	1	1	1	1	0.85	0	0	2	2.42
GSK-239	CCCCCCCCCCCCCCCCCCC(=O)O	C19H38O2	298.5	21	0	0.95	17	2	1	95.22	37.3	4.43	8.75	6.72	4.91	6.57	6.28	-6.08	0.000248	8.29e-07	Poorly soluble	-9.41	1.15e-07	3.85e-10	Poorly soluble	-6.51	9.18e-05	3.08e-07	Poorly soluble	High	No	No	Yes	No	No	No	No	-1.91	1	1	1	1	2	0.85	0	0	2	2.65
GSK-240	O[C@H]1[C@@H]2CCO[C@H]3C2[C@]([C@@H]1O)(O)CO3	C9H14O5	202.2	14	0	1	0	5	3	44.73	79.15	1.05	-1.75	-1.54	-0.94	-0.69	-0.77	0.01	206	1.02	Highly soluble	0.6	810	4.01	Highly soluble	1.03	2180	10.8	Soluble	High	No	Yes	No	No	No	No	No	-8.78	0	1	0	0	0	0.55	0	0	1	4.47
GSK-241	O[C@H]1[C@@H]2CCO[C@H]3[C@@H]2[C@]([C@@H]1Cl)(O)CO3	C9H13ClO4	220.65	14	0	1	0	4	2	48.36	58.92	1.42	-0.47	-0.29	0.2	0.43	0.26	-0.91	27	0.122	Very soluble	-0.3	110	0.5	Very soluble	-0.16	152	0.69	Soluble	High	No	Yes	No	No	No	No	No	-7.98	0	0	0	0	0	0.55	0	1	1	4.52
GSK-242	OC[C@H]1O[C@@H](O[C@@H]2O[C@H]3OC[C@]4([C@@H]2[C@@H](C3)[C@@H]([C@H]4Cl)O)O)[C@@H]([C@H]([C@@H]1O)O)O	C15H23ClO10	398.79	26	0	1	3	10	6	81.91	158.3	1.84	-2.59	-3.15	-2.56	-2.66	-1.83	-0.48	131	0.329	Very soluble	-0.19	259	0.649	Very soluble	2.33	85700	215	Soluble	Low	No	Yes	No	No	No	No	No	-10.57	1	1	1	1	3	0.55	0	1	1	6.15
GSK-243	O=c1cc[nH]c(=O)[nH]1	C4H4N2O2	112.09	8	6	0	0	2	2	27.68	65.72	0.52	-1.07	-0.94	-1.21	1.35	-0.27	-0.42	43	0.384	Very soluble	0.18	169	1.51	Highly soluble	-1.41	4.39	0.0392	Soluble	High	No	No	No	No	No	No	No	-7.74	0	4	0	0	2	0.55	0	0	1	1.35
GSK-244	OC[C@H]1O[C@H]([C@@H]([C@@H]1O)O)n1ccc(=O)[nH]c1=O	C9H12N2O6	244.2	17	6	0.56	2	6	4	54.27	124.78	0.44	-1.98	-3.18	-1.83	-1.39	-1.59	-0.24	142	0.581	Very soluble	-0.12	187	0.764	Very soluble	0.74	1350	5.55	Soluble	Low	No	No	No	No	No	No	No	-9.2	0	1	0	0	0	0.55	0	0	1	3.76
GSK-245	OCC1=CC([C@@H]2[C@H]1C(OC=C2)O[C@H]1O[C@@H](CO)[C@H]([C@@H]([C@H]1O)O)O)O	C15H22O9	346.33	24	0	0.73	4	9	6	77.15	149.07	1.5	-3.02	-2.8	-2.7	-2.78	-1.96	0.18	523	1.51	Highly soluble	0.45	981	2.83	Highly soluble	2.76	200000	577	Soluble	Low	No	Yes	No	No	No	No	No	-10.56	1	1	1	1	2	0.55	0	1	0	5.79
GSK-246	O=C1CC[C@@H](N1)C(=O)O	C5H7NO3	129.11	9	0	0.6	1	3	2	32.72	66.4	0.51	-0.77	-1.03	-0.93	-0.08	-0.46	-0.09	105	0.814	Very soluble	-0.15	92.1	0.714	Very soluble	-0.04	119	0.923	Soluble	High	No	No	No	No	No	No	No	-7.63	0	4	0	0	1	0.85	0	0	1	1.67
GSK-247	OC[C@H]1O[C@@H](OC2OC=CC3C2C(C)(O)CC3O)[C@@H]([C@H]([C@@H]1O)O)O	C15H24O9	348.35	24	0	0.87	3	9	6	77.67	149.07	1.26	-2.19	-2.58	-2.59	-2.66	-1.75	-0.42	132	0.378	Very soluble	-0.41	136	0.39	Very soluble	2.54	121000	348	Soluble	Low	No	Yes	No	No	No	No	No	-9.98	1	1	1	1	2	0.55	0	0	0	5.74
GSK-248	OC[C@@H]1O[C@H](OC2OC=C[C@H]3[C@@H]2[C@@](C)(O)CC3O)[C@@H]([C@H]([C@@H]1O)O)O	C15H24O9	348.35	24	0	0.87	3	9	6	77.67	149.07	1.18	-2.19	-2.58	-2.59	-2.66	-1.77	-0.42	132	0.378	Very soluble	-0.41	136	0.39	Very soluble	2.54	121000	348	Soluble	Low	No	Yes	No	No	No	No	No	-9.98	1	1	1	1	2	0.55	0	0	0	5.74
GSK-249	O=C1N(Cc2ccccc2)C(=O)C2C(N1Cc1ccccc1)C2(Br)Br	C19H16Br2N2O2	464.15	25	12	0.26	4	2	0	110.7	40.62	3.32	3.59	3.07	3.64	3.39	3.4	-5.07	0.00394	8.5e-06	Moderately soluble	-4.13	0.0344	7.42e-05	Moderately soluble	-6.65	0.000105	2.25e-07	Poorly soluble	High	Yes	No	No	Yes	Yes	Yes	Yes	-6.58	0	0	0	0	0	0.55	0	1	2	3.57
GSK-250	CCCCCC/C=C\CCCCCCCC(=O)O	C16H30O2	254.41	18	0	0.81	13	2	1	80.32	37.3	3.53	6.58	5.33	4.09	5.07	4.92	-4.7	0.00502	1.97e-05	Moderately soluble	-7.16	1.75e-05	6.88e-08	Poorly soluble	-4.59	0.00649	2.55e-05	Moderately soluble	High	Yes	No	Yes	No	Yes	No	No	-3.18	0	0	1	0	1	0.85	0	1	2	2.84
GSK-251	CO[C@H]1O[C@@H]2OC[C@]3(C2[C@@H](C1)[C@H](O)[C@H]3Cl)O	C10H15ClO5	250.68	16	0	1	1	5	2	54.25	68.15	1.72	-0.46	-0.32	0.06	0	0.2	-1.04	22.9	0.0915	Very soluble	-0.51	78.4	0.313	Very soluble	-0.06	220	0.879	Soluble	High	No	Yes	No	No	No	No	No	-8.16	0	0	0	0	0	0.55	0	1	0	4.69
GSK-252	OC[C@H]1O[C@@H](O[C@@H]2OC=C[C@@H]3[C@H]2[C@H](C[C@@H]3O)O[C@H]2O[C@H](CO)[C@@H]([C@@H]([C@H]2O)O)O)[C@@H]([C@H]([C@@H]1O)O)O	C20H32O14	496.46	34	0	0.9	6	14	9	105.21	228.22	1.43	-3.96	-5.14	-4.37	-5.26	-3.46	-0.03	466	0.939	Very soluble	-0.23	289	0.583	Very soluble	4.89	38400000	77300	Soluble	Low	No	Yes	No	No	No	No	No	-12.14	2	2	1	1	4	0.17	0	0	1	6.65
GSK-253	CO[C@@H]1O[C@@H]2OC[C@]3(C2[C@@H](C1)[C@H](O)[C@H]3Cl)O	C10H15ClO5	250.68	16	0	1	1	5	2	54.25	68.15	1.7	-0.46	-0.32	0.06	0	0.2	-1.04	22.9	0.0915	Very soluble	-0.51	78.4	0.313	Very soluble	-0.06	220	0.879	Soluble	High	No	Yes	No	No	No	No	No	-8.16	0	0	0	0	0	0.55	0	1	0	4.69
GSK-254	CO[C@H]1O[C@@H]2OC[C@]3(C2[C@@H](C1)[C@H](O)[C@H]3O)O	C10H16O6	232.23	16	0	1	1	6	3	50.62	88.38	1.49	-1.73	-1.57	-1.04	-1.12	-0.79	-0.12	175	0.752	Very soluble	0.39	567	2.44	Highly soluble	1.13	3150	13.6	Soluble	High	No	Yes	No	No	No	No	No	-8.94	0	1	0	0	0	0.55	0	0	1	4.56
GSK-255	OC[C@H]1O[C@@H](Oc2cc(O)c3c(c2)oc(cc3=O)c2ccc(c(c2)O)O)[C@@H]([C@H]([C@@H]1O)O)O	C21H20O11	448.38	32	16	0.29	4	11	7	108.13	190.28	1.76	1.46	-0.24	-2.1	-0.12	0.15	-3.65	0.101	0.000226	Soluble	-5.06	0.00389	8.67e-06	Moderately soluble	-2.1	3.55	0.00791	Soluble	Low	No	Yes	No	No	No	No	No	-8	2	0	1	1	3	0.17	1	1	1	5.17
GSK-256	OC(=O)c1ccc(c(c1)O)O	C7H6O4	154.12	11	6	0	1	4	3	37.45	77.76	0.66	1.15	0.8	0.4	0.26	0.65	-1.86	2.14	0.0139	Very soluble	-2.38	0.646	0.00419	Soluble	-0.6	38.3	0.248	Soluble	High	No	No	No	No	No	No	Yes	-6.42	0	3	0	0	1	0.56	1	1	1	1.07
GSK-257	CC[C@@H](C(C)C)CC[C@H]([C@H]1CC[C@@H]2[C@]1(C)CC[C@H]1[C@H]2CC=C2[C@]1(C)CC[C@@H](C2)O)C	C29H50O	414.71	30	0	0.93	6	1	1	133.23	20.23	5.05	9.34	8.02	6.73	7.04	7.24	-7.9	5.23e-06	1.26e-08	Poorly soluble	-9.67	8.9e-08	2.15e-10	Poorly soluble	-6.19	0.000269	6.49e-07	Poorly soluble	Low	No	No	No	No	No	No	No	-2.2	1	3	0	1	2	0.55	0	1	2	6.3
GSK-258	Oc1cc2O[C@H](c3ccc(c(c3)O)O)[C@H](Cc2c(c1)O)O	C15H14O6	290.27	21	12	0.2	1	6	5	74.33	110.38	1.33	0.36	1.22	0.24	0.98	0.83	-2.22	1.74	0.00598	Soluble	-2.24	1.66	0.00572	Soluble	-2.14	2.09	0.00719	Soluble	High	No	Yes	No	No	No	No	No	-7.82	0	0	0	0	0	0.55	1	1	0	3.5
GSK-259	O=C(c1cc(O)c(c(c1)O)O)Oc1cc(cc(c1O)O)C(=O)O	C14H10O9	322.22	23	12	0	4	9	6	74.92	164.75	0.84	1.08	1.13	0.02	-0.04	0.61	-2.64	0.738	0.00229	Soluble	-4.13	0.0238	7.38e-05	Moderately soluble	-1.08	26.7	0.083	Soluble	Low	No	No	Yes	No	No	No	No	-7.5	1	0	1	1	2	0.11	1	2	0	2.45
GSK-260	CC[C@H](C(C)C)/C=C/[C@@H]([C@H]1CC[C@H]2[C@]1(C)CC[C@H]1[C@H]2CC=C2[C@]1(C)CC[C@H](C2)O[C@@H]1O[C@H](CO)[C@H]([C@@H]([C@H]1O)O)O)C	C35H58O6	574.83	41	0	0.89	8	6	4	165.14	99.38	4.88	6.96	5.63	3.85	4.84	5.23	-7.26	3.15e-05	5.49e-08	Poorly soluble	-8.86	7.92e-07	1.38e-09	Poorly soluble	-3.69	0.118	0.000206	Soluble	High	No	Yes	No	No	No	No	No	-4.86	1	4	0	0	1	0.55	0	1	3	7.93
GSK-261	OC(=O)/C=C/c1ccc(cc1)O	C9H8O3	164.16	12	6	0	2	3	2	45.13	57.53	0.95	1.46	1.38	1.28	1.22	1.26	-2.02	1.58	0.00965	Soluble	-2.27	0.873	0.00532	Soluble	-1.28	8.67	0.0528	Soluble	High	Yes	No	No	No	No	No	No	-6.26	0	0	0	0	1	0.85	0	1	1	1.61
GSK-262	Oc1ccc(cc1)[C@H]1CC(=O)c2c(O1)cc(cc2O)O	C15H12O5	272.25	20	12	0.13	1	5	3	71.57	86.99	1.74	2.52	2.19	0.71	2.05	1.84	-3.49	0.0874	0.000321	Soluble	-3.99	0.0277	0.000102	Soluble	-3.42	0.104	0.000382	Soluble	High	No	Yes	Yes	No	No	No	Yes	-6.17	0	0	0	0	0	0.55	0	0	0	3.01
GSK-263	COc1cc(ccc1O)[C@H]1OC[C@H]2[C@@H]1CO[C@@H]2c1ccc(c(c1)OC)O	C20H22O6	358.39	26	12	0.4	4	6	2	94.9	77.38	2.67	2.28	2.54	1.17	2.66	2.26	-3.58	0.0952	0.000266	Soluble	-3.54	0.103	0.000287	Soluble	-4.19	0.0229	6.4e-05	Moderately soluble	High	Yes	Yes	No	No	No	Yes	Yes	-6.87	0	0	0	0	0	0.55	0	0	1	3.99
GSK-264	OC[C@@H]([C@@H](Cc1ccc(c(c1)OC)O)CO)Cc1ccc(c(c1)OC)O	C20H26O6	362.42	26	12	0.4	9	6	4	99.28	99.38	2.77	2.52	2.12	1.56	3.34	2.46	-3.42	0.137	0.000378	Soluble	-4.25	0.0202	5.58e-05	Moderately soluble	-4.54	0.0105	2.9e-05	Moderately soluble	High	No	Yes	No	No	No	Yes	No	-6.72	0	0	0	0	0	0.55	0	0	2	3.21
GSK-265	Oc1cc2O/C(=C\c3ccc(c(c3)O)O)/C(=O)c2c(c1)O	C15H10O6	286.24	21	12	0	1	6	4	73.91	107.22	1.73	2.95	2.02	0.09	1.8	1.72	-3.83	0.0423	0.000148	Soluble	-4.86	0.00391	1.37e-05	Moderately soluble	-2.82	0.433	0.00151	Soluble	High	No	No	No	No	No	No	Yes	-5.95	0	0	0	0	0	0.55	1	2	0	2.97
GSK-266	COc1cc(/C=C/C(=O)O)cc(c1O)OC	C11H12O5	224.21	16	6	0.18	4	5	2	58.12	75.99	1.63	1.46	1.4	0.73	1.33	1.31	-2.16	1.54	0.00686	Soluble	-2.66	0.488	0.00218	Soluble	-1.55	6.33	0.0282	Soluble	High	No	No	No	No	No	No	No	-6.63	0	0	0	0	0	0.56	0	1	1	2.17
GSK-267	OC(=O)/C=C/c1ccccc1	C9H8O2	148.16	11	6	0	2	2	1	43.11	37.3	1.55	2.13	1.68	1.9	1.7	1.79	-2.37	0.629	0.00425	Soluble	-2.54	0.423	0.00285	Soluble	-1.84	2.14	0.0145	Soluble	High	Yes	No	No	No	No	No	No	-5.69	0	2	0	0	1	0.85	0	1	1	1.67
GSK-268	CC(=C)[C@H]1CC[C@]2([C@H]1CC[C@@]1([C@@H]2CC[C@H]2[C@@]1(C)CC[C@@H]1[C@]2(C)CCCC1(C)C)C)C	C30H50	410.72	30	0	0.93	1	0	0	133.98	0	4.99	11.4	9.05	8.91	7.71	8.41	-9.5	1.29e-07	3.14e-10	Poorly soluble	-11.38	1.71e-09	4.16e-12	Insoluble	-7.56	1.12e-05	2.73e-08	Poorly soluble	Low	No	No	No	No	No	No	No	-0.71	1	3	0	1	2	0.55	0	1	2	5.59
GSK-269	C[C@]12CC[C@@H]([C@@H]1CC[C@@]1([C@@H]2CC[C@H]2[C@@]1(C)CC[C@@H]1[C@]2(C)CCCC1(C)C)C)C(O)(C)C	C30H52O	428.73	31	0	1	1	1	1	135.65	20.23	4.92	9.89	8.25	7.07	6.94	7.41	-8.66	9.32e-07	2.17e-09	Poorly soluble	-10.24	2.47e-08	5.77e-11	Insoluble	-6.96	4.68e-05	1.09e-07	Poorly soluble	Low	No	No	No	No	No	No	No	-1.89	1	3	0	1	2	0.55	0	0	2	5.36
GSK-270	COc1cc(/C=C/C(=O)O[C@H]2CC[C@]3(C(=CC[C@@H]4[C@@H]3CC[C@]3([C@@H]4CC[C@@H]3[C@H](CC[C@H](C(C)C)C)C)C)C2)C)ccc1O	C38H56O4	576.85	42	6	0.71	10	4	1	176.29	55.76	6.38	11.07	9.5	6.61	8.53	8.42	-9.84	8.41e-08	1.46e-10	Poorly soluble	-12.21	3.56e-10	6.17e-13	Insoluble	-8.03	5.43e-06	9.42e-09	Poorly soluble	Low	No	No	No	No	No	No	No	-1.96	2	4	0	1	1	0.17	0	2	3	6.84
GSK-271	Oc1cc2O[C@H](CC(=O)c2c(c1)O)c1ccc(c(c1)O)O	C15H12O6	288.25	21	12	0.13	1	6	4	73.59	107.22	1.71	2.02	1.89	0.16	1.56	1.47	-3.26	0.16	0.000554	Soluble	-3.9	0.0364	0.000126	Soluble	-2.84	0.419	0.00145	Soluble	High	No	Yes	No	No	No	No	Yes	-6.62	0	0	0	0	0	0.55	1	1	0	3.11
GSK-272	OC[C@H]1O[C@@H](Oc2c(C)occc2=O)[C@@H]([C@H]([C@@H]1O)O)O	C12H16O8	288.25	20	6	0.58	3	8	4	64.09	129.59	1.38	-1.45	-1.87	-2.63	-0.76	-1.07	-0.74	52.7	0.183	Very soluble	-0.77	49.2	0.171	Very soluble	-0.14	209	0.726	Soluble	Low	No	No	No	No	No	No	No	-9.09	0	1	0	0	0	0.55	0	0	0	4.66
GSK-273	OC[C@H]1O[C@H]([C@@H]([C@H]([C@@H]1O)O)O)c1c(O)cc(c2c1oc(cc2=O)c1ccc(c(c1)O)O)O	C21H20O11	448.38	32	16	0.29	3	11	8	108.63	201.28	1	-0.15	-0.53	-2.51	-0.14	-0.47	-2.7	0.9	0.00201	Soluble	-3.62	0.107	0.000239	Soluble	-1.79	7.32	0.0163	Soluble	Low	No	No	No	No	No	No	No	-9.14	2	1	1	1	3	0.17	1	1	1	5.17
GSK-274	Oc1ccc(cc1)[C@@H]1CC(=O)c2c(O1)cc(cc2O)O	C15H12O5	272.25	20	12	0.13	1	5	3	71.57	86.99	1.75	2.52	2.19	0.71	2.05	1.84	-3.49	0.0874	0.000321	Soluble	-3.99	0.0277	0.000102	Soluble	-3.42	0.104	0.000382	Soluble	High	No	Yes	Yes	No	No	No	Yes	-6.17	0	0	0	0	0	0.55	0	0	0	3.01
GSK-275	Oc1ccc(cc1)c1oc2cc(O)cc(c2c(=O)c1O[C@@H]1O[C@@H](C)[C@@H]([C@H]([C@H]1O)O)O)O	C21H20O10	432.38	31	16	0.29	3	10	6	106.97	170.05	2.23	1.22	0.78	-1.34	0.48	0.67	-3.47	0.145	0.000336	Soluble	-4.39	0.0177	4.09e-05	Moderately soluble	-2.67	0.914	0.00211	Soluble	Low	No	Yes	No	No	No	No	No	-8.07	1	0	1	1	2	0.55	0	0	1	5.25
GSK-276	OC[C@H]1O[C@H]([C@@H]([C@H]([C@@H]1O)O)O)c1c(O)cc2c(c1O)c(=O)c1c(o2)cc(c(c1)O)O	C19H18O11	422.34	30	14	0.32	2	11	8	100.7	201.28	0.89	-0.37	-1.04	-2.66	-0.68	-0.77	-2.44	1.54	0.00364	Soluble	-3.39	0.17	0.000404	Soluble	-0.97	45.2	0.107	Soluble	Low	No	No	No	No	No	No	No	-9.14	2	1	1	1	3	0.17	1	2	1	4.76
GSK-277	OC[C@H]1O[C@H]([C@@H]([C@H]([C@@H]1O)O)O)c1c(O)cc(c2c1oc1cc(O)c(cc1c2=O)O)O	C19H18O11	422.34	30	14	0.32	2	11	8	100.7	201.28	1.08	-0.37	-1.04	-2.66	-0.68	-0.73	-2.44	1.54	0.00364	Soluble	-3.39	0.17	0.000404	Soluble	-0.97	45.2	0.107	Soluble	Low	No	No	No	No	No	No	No	-9.14	2	1	1	1	3	0.17	1	2	1	4.9
GSK-278	Oc1cc2O[C@@H](CC(=O)c2c(c1)O)c1ccc(c(c1)O)O	C15H12O6	288.25	21	12	0.13	1	6	4	73.59	107.22	1.62	2.02	1.89	0.16	1.56	1.45	-3.26	0.16	0.000554	Soluble	-3.9	0.0364	0.000126	Soluble	-2.84	0.419	0.00145	Soluble	High	No	Yes	No	No	No	No	Yes	-6.62	0	0	0	0	0	0.55	1	1	0	3.11
GSK-279	Oc1cc2O[C@H](c3ccc(c(c3)O)O)[C@@H](Cc2c(c1)O)O	C15H14O6	290.27	21	12	0.2	1	6	5	74.33	110.38	1.47	0.36	1.22	0.24	0.98	0.85	-2.22	1.74	0.00598	Soluble	-2.24	1.66	0.00572	Soluble	-2.14	2.09	0.00719	Soluble	High	No	Yes	No	No	No	No	No	-7.82	0	0	0	0	0	0.55	1	1	0	3.5
GSK-280	CC(=CC[C@@H](C(=C)C)Cc1c(O)cc(c2c1oc(c1ccc(cc1O)O)c(c2=O)O)O)C	C25H26O7	438.47	32	16	0.24	6	7	5	125.32	131.36	3.01	5.28	5.08	1.56	4.94	3.98	-5.86	0.000607	1.38e-06	Moderately soluble	-7.79	7.13e-06	1.63e-08	Poorly soluble	-5.7	0.000883	2.01e-06	Moderately soluble	Low	No	No	No	No	Yes	No	Yes	-5.23	0	0	0	0	1	0.55	0	1	2	4.69
GSK-281	COc1cc(O)ccc1[C@@H]1CC(=O)c2c(O1)c(C[C@H](C(=C)C)CC=C(C)C)c(cc2O)O	C26H30O6	438.51	32	12	0.35	7	6	3	125.34	96.22	3.36	6.1	5.29	2.48	5.5	4.55	-6.22	0.000266	6.06e-07	Poorly soluble	-7.9	5.5e-06	1.25e-08	Poorly soluble	-5.99	0.00045	1.03e-06	Moderately soluble	High	No	No	No	No	Yes	No	Yes	-4.64	0	0	0	0	1	0.55	0	1	2	4.55
GSK-282	Oc1ccc(cc1)[C@H]1Oc2cc(O)cc(c2C[C@H]1O)O	C15H14O5	274.27	20	12	0.2	1	5	4	72.31	90.15	1.51	0.72	1.52	0.79	1.47	1.2	-2.37	1.16	0.00425	Soluble	-2.19	1.76	0.00643	Soluble	-2.72	0.519	0.00189	Soluble	High	No	Yes	No	No	No	No	No	-7.46	0	0	0	0	0	0.55	0	0	0	3.39
GSK-283	Oc1cc(O)c2c(c1)O[C@@H]([C@@H]([C@H]2c1c(O)cc(c2c1O[C@@H]([C@@H](C2)O)c1ccc(c(c1)O)O)O)O)c1ccc(c(c1)O)O	C30H26O12	578.52	42	24	0.2	3	12	10	146.71	220.76	1.35	2.37	2.35	-0.26	1.14	1.39	-5.14	0.00415	7.17e-06	Moderately soluble	-6.65	0.000131	2.26e-07	Poorly soluble	-3.91	0.0705	0.000122	Soluble	Low	No	No	No	No	No	No	Yes	-8.15	3	2	1	1	3	0.17	1	1	1	5.32
GSK-284	OC[C@H]1O[C@@H](Oc2ccc(cc2OC)[C@H]2OC[C@H]3[C@@H]2CO[C@@H]3c2ccc(c(c2)OC)O)[C@@H]([C@H]([C@@H]1O)O)O	C26H32O11	520.53	37	12	0.54	7	11	5	127.02	156.53	2.95	0.48	0.01	-1.05	0.52	0.58	-3.15	0.37	0.000712	Soluble	-3.34	0.24	0.000461	Soluble	-2.43	1.92	0.00369	Soluble	Low	No	Yes	No	No	No	No	No	-9.13	2	1	1	1	2	0.17	0	0	1	5.72
GSK-285	OC[C@@H]([C@H](c1cc2c(c(c1)OC)O[C@@H]([C@H]2CO)c1ccc(c(c1)OC)O)O)O	C20H24O8	392.4	28	12	0.4	7	8	5	99.31	128.84	2.2	0	0.36	-0.42	1.79	0.79	-2.13	2.92	0.00745	Soluble	-2.26	2.17	0.00554	Soluble	-2.96	0.429	0.00109	Soluble	High	No	Yes	No	No	No	No	No	-8.69	0	0	0	0	0	0.55	0	0	1	4.46
GSK-286	OC[C@H]1O[C@@H](Oc2cc(O)cc3c2C[C@H](O)[C@H](O3)c2ccc(c(c2)O)O)[C@H]([C@H]([C@@H]1O)O)O	C21H24O11	452.41	32	12	0.43	4	11	8	106.46	189.53	1.36	-1.44	-1.31	-1.83	-1.18	-0.88	-1.75	8.02	0.0177	Very soluble	-2.04	4.15	0.00918	Soluble	-0.42	172	0.381	Soluble	Low	No	No	No	No	No	No	No	-10.08	2	1	1	1	3	0.17	1	1	1	5.32
GSK-287	CC[C@H](C(C)C)/C=C/[C@H]([C@@H]1CC[C@@H]2[C@@]1(C)CC[C@@H]1[C@@H]2CC[C@H]2[C@]1(C)CCC(=O)C2)C	C29H48O	412.69	30	0	0.9	5	1	0	132.27	17.07	4.83	8.96	8.09	6.62	7.46	7.19	-7.71	7.98e-06	1.93e-08	Poorly soluble	-9.21	2.56e-07	6.2e-10	Poorly soluble	-6.18	0.000271	6.58e-07	Poorly soluble	Low	No	No	No	No	No	No	No	-2.46	1	3	0	1	2	0.55	0	1	2	5.79
GSK-288	OC[C@H]1O[C@@H](Oc2cc3O/C(=C\c4ccc(c(c4)O)O)/C(=O)c3c(c2)O)[C@@H]([C@H]([C@@H]1O)O)O	C21H20O11	448.38	32	12	0.29	4	11	7	106.03	186.37	1.94	0.92	-0.51	-1.99	-0.33	0.01	-3.21	0.275	0.000612	Soluble	-4.42	0.0171	3.8e-05	Moderately soluble	-1.1	35.7	0.0796	Soluble	Low	No	Yes	No	No	No	No	No	-8.38	2	1	1	1	3	0.17	1	2	1	5.13
GSK-289	CC(=O)O[C@@H]1CC[C@@]23[C@H](C1(C)C)CC[C@H]1[C@]3(C2)CC[C@]2([C@@]1(C)CC[C@@H]2[C@H](CC[C@@H](C(=C)C)C)C)C	C33H54O2	482.78	35	0	0.91	7	2	0	149.69	26.3	5.56	10.99	8.99	7.27	8.46	8.25	-9.29	2.45e-07	5.07e-10	Poorly soluble	-11.51	1.5e-09	3.11e-12	Insoluble	-7.87	6.54e-06	1.36e-08	Poorly soluble	Low	No	No	No	No	No	No	No	-1.44	1	4	0	1	1	0.55	0	1	2	6.56
GSK-290	OC[C@H]1O[C@@H](Oc2cc(O)cc3c2C[C@@H](O)[C@H](O3)c2ccc(cc2)O)[C@H]([C@H]([C@@H]1O)O)O	C21H24O10	436.41	31	12	0.43	4	10	7	104.43	169.3	1.51	-0.03	-1.01	-1.34	-0.7	-0.31	-2.55	1.23	0.00282	Soluble	-3.08	0.367	0.000841	Soluble	-1.01	42.7	0.0979	Soluble	Low	No	No	No	No	No	No	No	-8.98	1	1	1	1	2	0.55	0	0	1	5.26
GSK-291	OC[C@H]1O[C@@H](O[C@@H]2Cc3c(O)cc(cc3O[C@@H]2c2ccc(c(c2)O)O)O)[C@@H]([C@@H]([C@@H]1O)O)O	C21H24O11	452.41	32	12	0.43	4	11	8	106.72	189.53	1.31	-1.23	-0.95	-1.83	-1.18	-0.78	-1.88	5.92	0.0131	Very soluble	-2.25	2.52	0.00556	Soluble	-0.42	172	0.381	Soluble	Low	No	No	No	No	No	No	No	-9.93	2	1	1	1	3	0.17	1	1	1	5.34
GSK-292	OC(=O)[C@H]1O[C@@H](Oc2cc3O[C@H](CC(=O)c3c(c2)O)c2ccc(c(c2)O)O)[C@@H]([C@H]([C@@H]1O)O)O	C21H20O12	464.38	33	12	0.33	4	12	7	106.33	203.44	1.95	0.46	-0.54	-1.94	-1.04	-0.22	-3.01	0.45	0.000968	Soluble	-4.3	0.0232	5e-05	Moderately soluble	-0.65	105	0.226	Soluble	Low	No	Yes	No	No	No	No	No	-8.81	2	1	1	1	3	0.11	1	1	1	5.04
GSK-293	O=C1C[C@@H]2[C@@](C1)(C)[C@H]1CC[C@H]3[C@@]([C@@]1(CC2)C)(C)CC[C@@H]1[C@]3(C)CCCC1(C)C	C27H44O	384.64	28	0	0.96	0	1	0	120.23	17.07	4.06	8.48	7.43	6.34	6.65	6.59	-7.57	1.04e-05	2.71e-08	Poorly soluble	-8.71	7.51e-07	1.95e-09	Poorly soluble	-6.87	5.16e-05	1.34e-07	Poorly soluble	Low	No	No	No	No	Yes	No	No	-2.63	1	2	0	1	2	0.55	0	0	2	4.88
GSK-294	O[C@H]1CO[C@H]([C@H]([C@H]1O)O)Oc1cc(O)c2c(c1)oc(c(c2=O)O)c1ccc(cc1)O	C20H18O10	418.35	30	16	0.25	3	10	6	102.17	170.05	2.19	0.78	0.39	-1.57	0.38	0.43	-3.12	0.316	0.000755	Soluble	-3.93	0.049	0.000117	Soluble	-2.53	1.23	0.00294	Soluble	Low	No	No	No	No	No	No	No	-8.3	1	0	1	1	2	0.55	0	0	1	4.96
GSK-295	OC[C@H]1O[C@H]([C@@H]([C@H]([C@@H]1O)O)O)c1c(O)c([C@@H]2O[C@H](CO)[C@H]([C@@H]([C@H]2O)O)O)c(c2c1oc(cc2=O)c1ccc(c(c1)O)O)O	C27H30O16	610.52	43	16	0.44	5	16	12	141.25	291.43	1.8	-2.61	-3.34	-4.97	-2.27	-2.28	-1.93	7.24	0.0119	Very soluble	-2.96	0.665	0.00109	Soluble	0.33	1290	2.11	Soluble	Low	No	No	No	No	No	No	No	-11.88	3	4	1	1	5	0.17	1	1	1	6.44
GSK-296	OC(=O)[C@H]1O[C@@H](Oc2cc(O)c3c(c2)oc(cc3=O)c2ccc(c(c2)O)O)[C@@H]([C@H]([C@@H]1O)O)O	C21H18O12	462.36	33	16	0.24	4	12	7	108.74	207.35	1.56	0.97	-0.15	-2.12	-0.57	-0.06	-3.41	0.179	0.000387	Soluble	-4.91	0.00566	1.22e-05	Moderately soluble	-1.63	10.8	0.0233	Soluble	Low	No	Yes	No	No	No	No	No	-8.43	2	0	1	1	3	0.11	1	1	1	5.11
GSK-297	OC[C@@H]1O[C@@H](Oc2ccc(cc2O)c2cc(=O)c3c(o2)cc(cc3O)O[C@@H]2O[C@@H](CO)[C@H]([C@H]([C@H]2O)O)O)[C@H]([C@H]([C@@H]1O)O)O[C@@H]1O[C@@H](C)[C@@H]([C@@H]([C@@H]1O)O)O	C33H40O20	756.66	53	16	0.55	9	20	12	171.48	328.35	3.09	-1.44	-3.92	-5.49	-3.74	-2.3	-3.25	0.422	0.000558	Soluble	-4.95	0.00845	1.12e-05	Moderately soluble	0.95	6810	8.99	Soluble	Low	No	Yes	No	No	No	No	No	-11.94	3	4	1	1	4	0.17	0	0	2	7.48
GSK-298	OC[C@H]1O[C@@H](Oc2cc3O[C@@H](CC(=O)c3c(c2)O)c2ccc(cc2)O)[C@@H]([C@H]([C@@H]1O)O)O	C21H22O10	434.39	31	12	0.38	4	10	6	103.69	166.14	2.35	0.65	-0.34	-1.42	-0.11	0.23	-2.97	0.471	0.00108	Soluble	-3.71	0.0838	0.000193	Soluble	-1.71	8.55	0.0197	Soluble	Low	No	Yes	No	No	No	No	No	-8.49	1	0	1	1	2	0.55	0	0	1	4.98
GSK-299	Oc1cc(O)c2c(c1)O[C@H]([C@@H]([C@H]2c1c(O)cc(c2c1O[C@H]([C@H](C2)O)c1ccc(c(c1)O)O)O)O)c1ccc(c(c1)O)O	C30H26O12	578.52	42	24	0.2	3	12	10	146.71	220.76	2.09	2.37	2.35	-0.26	1.14	1.54	-5.14	0.00415	7.17e-06	Moderately soluble	-6.65	0.000131	2.26e-07	Poorly soluble	-3.91	0.0705	0.000122	Soluble	Low	No	No	No	No	No	No	Yes	-8.15	3	2	1	1	3	0.17	1	1	1	5.32
GSK-300	O=C1C(=CC(=O)c2c1ccc(c2O)C1=C(C)C(=O)c2c(C1=O)c(O)ccc2)C	C22H14O6	374.34	28	12	0.09	1	6	2	100.98	108.74	2.56	3.75	3.28	0.62	4.17	2.87	-4.77	0.00629	1.68e-05	Moderately soluble	-5.73	0.000703	1.88e-06	Moderately soluble	-5.98	0.000395	1.05e-06	Moderately soluble	High	No	No	Yes	No	Yes	No	Yes	-5.92	0	0	0	0	0	0.55	2	0	2	3.52
GSK-301	CC(=CCC[C@@H]([C@H]1CC[C@]2([C@]1(C)CC[C@@]13[C@@H]2CC[C@@H]2[C@@]3(C1)CCC(=O)C2(C)C)C)C)C	C30H48O	424.7	31	0	0.9	4	1	0	134.18	17.07	5.07	9.46	8.38	6.82	8.11	7.57	-8.17	2.88e-06	6.78e-09	Poorly soluble	-9.73	7.98e-08	1.88e-10	Poorly soluble	-7.57	1.16e-05	2.72e-08	Poorly soluble	Low	No	No	No	No	No	No	No	-2.17	1	3	0	1	2	0.55	0	1	2	6.38
GSK-302	CC(=C)[C@H](CC[C@@H]([C@H]1CC[C@@]2([C@]1(C)CC[C@]13[C@@H]2CC[C@@H]2[C@@]3(C1)CC[C@@H](C2(C)C)O)C)C)C	C31H52O	440.74	32	0	0.94	5	1	1	139.95	20.23	5.15	10.41	8.41	7.12	7.93	7.8	-8.8	6.97e-07	1.58e-09	Poorly soluble	-10.78	7.34e-09	1.67e-11	Insoluble	-7.26	2.42e-05	5.48e-08	Poorly soluble	Low	No	No	No	No	No	No	No	-1.6	1	3	0	1	2	0.55	0	1	2	6.43
GSK-303	OC[C@H]1O[C@@H](O[C@@H]2Cc3c(O)cc(c(c3O[C@@H]2c2ccc(c(c2)O)O)[C@H]2CCC(=O)N2)O)[C@@H]([C@@H]([C@@H]1O)O)O	C25H29NO12	535.5	38	12	0.48	5	12	9	130.91	218.63	1.27	-0.96	-1.71	-2.16	-1.02	-0.92	-2.46	1.86	0.00348	Soluble	-3.15	0.382	0.000714	Soluble	-1.15	38.3	0.0716	Soluble	Low	No	Yes	No	No	No	No	No	-10.25	3	3	1	1	3	0.17	2	1	1	5.62
GSK-304	O=C1CC[C@@H](N1)c1c(O)cc(c2c1O[C@@H]([C@@H](C2)O)c1ccc(c(c1)O)O)O	C19H19NO7	373.36	27	12	0.32	2	7	6	98.52	139.48	1.51	-0.43	0.47	-0.06	1.13	0.52	-2.08	3.1	0.0083	Soluble	-2.03	3.45	0.00925	Soluble	-2.91	0.457	0.00122	Soluble	High	No	No	No	No	No	No	No	-8.88	1	0	0	1	1	0.55	2	1	1	3.93
GSK-305	OC[C@H]1O[C@@H](O[C@@H]2Cc3c(O)cc(c(c3O[C@H]2c2ccc(c(c2)O)O)[C@@H]2CCC(=O)N2)O)[C@@H]([C@@H]([C@@H]1O)O)O	C25H29NO12	535.5	38	12	0.48	5	12	9	130.91	218.63	1.67	-0.96	-1.71	-2.16	-1.02	-0.84	-2.46	1.86	0.00348	Soluble	-3.15	0.382	0.000714	Soluble	-1.15	38.3	0.0716	Soluble	Low	No	Yes	No	No	No	No	No	-10.25	3	3	1	1	3	0.17	2	1	1	5.62
GSK-306	O=C1CC[C@H](N1)c1c(O)cc(c2c1O[C@H]([C@@H](C2)O)c1ccc(c(c1)O)O)O	C19H19NO7	373.36	27	12	0.32	2	7	6	98.52	139.48	1.68	-0.43	0.47	-0.06	1.13	0.56	-2.08	3.1	0.0083	Soluble	-2.03	3.45	0.00925	Soluble	-2.91	0.457	0.00122	Soluble	High	No	No	No	No	No	No	No	-8.88	1	0	0	1	1	0.55	2	1	1	3.93
GSK-307	OC[C@H]1O[C@H](Oc2cc3O[C@@H](CC(=O)c3c(c2)O)c2ccc(c(c2)O)O)[C@@H]([C@H]([C@@H]1O)O)O	C21H22O11	450.39	32	12	0.38	4	11	7	105.72	186.37	1.74	0.3	-0.64	-1.91	-0.59	-0.22	-2.83	0.659	0.00146	Soluble	-3.78	0.0754	0.000167	Soluble	-1.11	34.6	0.0767	Soluble	Low	No	Yes	No	No	No	No	No	-8.83	2	1	1	1	3	0.17	1	1	1	5.05
GSK-308	CC([C@H]1CC[C@@H]2[C@]1(C)CC[C@]1([C@@]2(C)CC=C2[C@@H]1CC[C@@H]1[C@]2(C)CCCC1(C)C)C)C	C30H50	410.72	30	0	0.93	1	0	0	133.98	0	5.06	10.54	9.05	8.91	7.69	8.25	-8.96	4.5e-07	1.09e-09	Poorly soluble	-10.49	1.33e-08	3.25e-11	Insoluble	-7.54	1.2e-05	2.92e-08	Poorly soluble	Low	No	No	No	No	No	No	No	-1.32	1	3	0	1	2	0.55	0	1	2	6.33
GSK-309	CC([C@H]1CC[C@@H]2[C@]1(C)CC[C@]1([C@@]2(C)CC=C2C1=CC[C@@H]1[C@]2(C)CCCC1(C)C)C)C	C30H48	408.7	30	0	0.87	1	0	0	133.51	0	5	9.95	8.97	7.89	7.68	7.9	-8.58	1.08e-06	2.65e-09	Poorly soluble	-9.88	5.43e-08	1.33e-10	Poorly soluble	-7.52	1.24e-05	3.03e-08	Poorly soluble	Low	No	No	No	No	No	No	No	-1.73	1	3	0	1	2	0.55	0	0	2	6.57
GSK-310	Oc1ccc(cc1)C(=O)c1c(O)cc(cc1O)O	C13H10O5	246.22	18	12	0	2	5	4	64.41	97.99	1.14	2.39	1.74	0.58	1.43	1.46	-3.23	0.144	0.000584	Soluble	-4.09	0.0201	8.15e-05	Moderately soluble	-2.57	0.664	0.0027	Soluble	High	No	No	Yes	No	Yes	No	Yes	-6.11	0	0	0	0	0	0.55	0	0	1	1.72
GSK-311	COc1cc(O)c(c2c1C(=O)C[C@H](O2)c1ccc(cc1O)O)C[C@H](C(=C)C)CC=C(C)C	C26H30O6	438.51	32	12	0.35	7	6	3	125.34	96.22	3.08	5.55	5.29	2.48	5.5	4.38	-5.87	0.00059	1.35e-06	Moderately soluble	-7.33	2.05e-05	4.67e-08	Poorly soluble	-5.99	0.00045	1.03e-06	Moderately soluble	High	No	Yes	No	No	Yes	No	Yes	-5.03	0	0	0	0	1	0.55	0	1	2	4.55
GSK-312	OC[C@H]1O[C@@H](O[C@@H]2C[C@@H]([C@@H]3[C@@]2(C)CCC(=CC3)C(=O)OC)CC(=O)OC)[C@@H]([C@H]([C@@H]1O)O)O	C22H34O10	458.5	32	0	0.82	8	10	4	110.18	151.98	2.6	0.22	-0.34	-0.31	-0.02	0.43	-2.29	2.33	0.00509	Soluble	-2.97	0.49	0.00107	Soluble	-0.34	211	0.459	Soluble	Low	No	Yes	No	No	No	No	No	-8.94	0	0	1	1	1	0.55	0	1	2	6.09
GSK-313	COC(=O)C[C@@H]1C[C@H]([C@]2([C@@H]1CC=C(CC2)C(=O)OC)C)O	C16H24O5	296.36	21	0	0.75	5	5	1	77.8	72.83	2.99	1.81	1.84	1.85	1.95	2.09	-2.49	0.964	0.00325	Soluble	-2.96	0.326	0.0011	Soluble	-2.06	2.55	0.00861	Soluble	High	Yes	No	No	No	No	No	No	-6.82	0	0	0	0	0	0.55	0	1	0	4.42
GSK-314	OC[C@H]1O[C@@H](Oc2cc(O)c3c(c2)O[C@@H](CC3=O)c2ccc(c(c2)O)O)[C@@H]([C@H]([C@@H]1O)O)O[C@@H]1O[C@@H](C)[C@@H]([C@H]([C@H]1O)O)O	C27H32O15	596.53	42	12	0.52	6	15	9	136.94	245.29	1.94	-0.8	-1.78	-3.24	-2.1	-1.2	-2.85	0.843	0.00141	Soluble	-3.87	0.0801	0.000134	Soluble	0.1	756	1.27	Soluble	Low	No	Yes	No	No	No	No	No	-10.51	3	4	1	1	3	0.17	1	1	1	6.23
GSK-315	Oc1cc(O)c2c(c1)O[C@H]([C@@H](C2)O[C@]1(Oc2cc(O)cc(c2[C@H]([C@H]1O)O)O)c1ccc(c(c1)O)O)c1ccc(c(c1)O)O	C30H26O13	594.52	43	24	0.2	4	13	10	147.52	229.99	1.6	1.95	1.98	-0.34	0.66	1.17	-4.9	0.00742	1.25e-05	Moderately soluble	-6.4	0.000234	3.94e-07	Poorly soluble	-3.85	0.0834	0.00014	Soluble	Low	No	No	No	No	No	No	No	-8.54	3	2	1	1	3	0.17	1	1	1	5.64
GSK-316	CC(=CC[C@@H](C(=C)C)Cc1c(O)cc(c2c1O[C@@H](CC2=O)c1ccc(cc1O)O)O)C	C25H28O6	424.49	31	12	0.32	6	6	4	120.87	107.22	3.14	5.78	4.98	2.28	4.95	4.23	-6	0.000421	9.92e-07	Poorly soluble	-7.8	6.72e-06	1.58e-08	Poorly soluble	-5.3	0.00213	5.02e-06	Moderately soluble	High	No	No	No	No	Yes	No	Yes	-4.79	0	0	0	0	1	0.55	0	1	2	4.44
GSK-317	COc1cc(O)c(c(c1CC=C(C)C)O)C(=O)/C=C/c1ccc(cc1)O	C21H22O5	354.4	26	12	0.19	6	5	3	102.53	86.99	2.6	5.07	4.11	2.36	4.31	3.69	-5.18	0.00236	6.65e-06	Moderately soluble	-6.64	8.14e-05	2.3e-07	Poorly soluble	-4.58	0.00926	2.61e-05	Moderately soluble	High	No	No	Yes	No	Yes	No	Yes	-4.86	0	0	0	0	1	0.55	0	2	2	3.13
GSK-318	Oc1ccc(cc1)[C@@H]1CC(=O)c2c(O1)cc(cc2O)O[C@@H]1O[C@H](CO[C@@H]2O[C@@H](C)[C@@H]([C@H]([C@H]2O)O)O)[C@H]([C@@H]([C@H]1O)O)O	C27H32O14	580.53	41	12	0.52	6	14	8	134.91	225.06	1.58	-0.99	-1.49	-2.77	-1.64	-1.06	-2.64	1.34	0.00231	Soluble	-3.25	0.326	0.000562	Soluble	-0.49	187	0.321	Soluble	Low	No	Yes	No	No	No	No	No	-10.54	3	4	1	1	3	0.17	0	0	1	6.15
GSK-319	CC(=C1CC[C@]2([C@H]1CC[C@@]1([C@@H]2CC[C@H]2[C@@]1(C)CC[C@@H]1[C@]2(C)CCCC1(C)C)C)C)C	C30H50	410.72	30	0	0.93	0	0	0	133.98	0	5.02	10.72	9.2	8.91	7.82	8.33	-9.14	2.98e-07	7.24e-10	Poorly soluble	-10.68	8.67e-09	2.11e-11	Insoluble	-7.76	7.06e-06	1.72e-08	Poorly soluble	Low	No	No	No	No	No	No	No	-1.19	1	3	0	1	2	0.55	0	1	2	5.89
GSK-320	CC(=CCC[C@H]([C@H]1CC[C@@]2([C@]1(C)CCC13[C@H]2CCC2[C@]3(C1)CC[C@@H](C2(C)C)OC(=O)C)C)C)C	C32H52O2	468.75	34	0	0.91	6	2	0	144.88	26.3	5.29	10.35	8.74	7.08	8.04	7.9	-8.87	6.31e-07	1.35e-09	Poorly soluble	-10.84	6.72e-09	1.43e-11	Insoluble	-7.48	1.56e-05	3.32e-08	Poorly soluble	Low	No	No	No	No	No	No	No	-1.81	1	3	0	1	1	0.55	0	1	2	6.55
GSK-321	OC[C@H]1O[C@@H](Oc2cc(O)c3c(c2)O[C@@H](CC3=O)c2ccc(cc2)O)[C@@H]([C@H]([C@@H]1O)O)O[C@@H]1O[C@@H](C)[C@@H]([C@H]([C@H]1O)O)O	C27H32O14	580.53	41	12	0.52	6	14	8	134.91	225.06	1.96	-0.44	-1.49	-2.77	-1.64	-0.87	-2.98	0.604	0.00104	Soluble	-3.82	0.0877	0.000151	Soluble	-0.49	187	0.321	Soluble	Low	No	Yes	No	No	No	No	No	-10.15	3	4	1	1	3	0.17	0	0	1	6.16
GSK-322	CCC[C@H](C(C)C)CC[C@H]([C@H]1CC[C@@H]2[C@]1(C)CC[C@H]1[C@H]2CC=C2[C@]1(C)CC[C@@H](C2)O)C	C30H52O	428.73	31	0	0.93	7	1	1	138.04	20.23	5.37	9.88	8.41	6.92	7.45	7.61	-8.26	2.35e-06	5.49e-09	Poorly soluble	-10.23	2.53e-08	5.91e-11	Insoluble	-6.58	0.000113	2.64e-07	Poorly soluble	Low	No	No	No	No	No	No	No	-1.9	1	3	0	1	2	0.55	0	1	2	6.42
GSK-323	NC(=N)NCCC[C@@H](C(=O)O)N	C6H14N4O2	174.2	12	0	0.67	6	4	5	44.53	125.22	0.31	-4.2	-1.34	-3.21	-1.61	-2.01	2.12	23100	132	Highly soluble	2.18	26200	150	Highly soluble	0.06	200	1.15	Soluble	High	No	No	No	No	No	No	No	-10.34	0	1	0	0	2	0.55	0	2	1	2.16
GSK-324	OC(=O)[C@@H]1CCCN1	C5H9NO2	115.13	8	0	0.8	1	3	2	32.52	49.33	0.84	-2.5	-0.56	-2.59	0.22	-0.92	1.09	1410	12.2	Highly soluble	2.01	11700	102	Highly soluble	-0.13	85.7	0.745	Soluble	High	No	No	No	No	No	No	No	-8.78	0	4	0	0	2	0.55	0	0	1	1.54
GSK-325	CCCCCCCCCCCCCCCC(=O)O	C16H32O2	256.42	18	0	0.94	14	2	1	80.8	37.3	3.85	7.17	5.55	4.19	5.25	5.2	-5.02	0.00243	9.49e-06	Moderately soluble	-7.77	4.31e-06	1.68e-08	Poorly soluble	-5.31	0.00125	4.88e-06	Moderately soluble	High	Yes	No	Yes	No	Yes	No	No	-2.77	1	0	1	0	1	0.85	0	0	2	2.31
GSK-326	COc1cc(ccc1O)C(=O)O	C8H8O4	168.15	12	6	0.12	2	4	2	41.92	66.76	1.4	1.43	1.1	0.74	0.73	1.08	-2.02	1.6	0.00952	Soluble	-2.44	0.615	0.00366	Soluble	-1.32	8.1	0.0482	Soluble	High	No	No	No	No	No	No	No	-6.31	0	0	0	0	1	0.85	0	0	1	1.42
GSK-327	CC(=C)[C@@H]1CC[C@]2([C@H]1[C@H]1CC[C@H]3[C@@]([C@]1(C)CC2)(C)CC[C@@H]1[C@]3(C)CC[C@@H](C1(C)C)O)C(=O)O	C30H48O3	456.7	33	0	0.9	2	3	2	136.91	57.53	3.81	8.21	7.09	5.82	5.75	6.14	-7.71	8.87e-06	1.94e-08	Poorly soluble	-9.28	2.4e-07	5.26e-10	Poorly soluble	-5.7	0.000909	1.99e-06	Moderately soluble	Low	No	No	No	No	Yes	No	No	-3.26	1	3	0	1	1	0.85	0	1	2	5.63
GSK-328	COc1c(oc2c(c1=O)c(O)cc(c2)OC)c1ccc(cc1)O	C17H14O6	314.29	23	16	0.12	3	6	2	84.95	89.13	2.81	2.55	2.89	0.47	3.07	2.36	-3.71	0.061	0.000194	Soluble	-4.07	0.0268	8.53e-05	Moderately soluble	-5.22	0.00191	6.08e-06	Moderately soluble	High	No	No	Yes	No	Yes	Yes	Yes	-6.41	0	0	0	0	0	0.55	0	0	0	3.34
GSK-329	COc1cc(O)c2c(c1)oc(c(c2=O)O)c1ccc(cc1)O	C16H12O6	300.26	22	16	0.06	2	6	3	80.48	100.13	2.31	2.22	2.59	0.22	2.55	1.98	-3.51	0.0936	0.000312	Soluble	-3.96	0.0331	0.00011	Soluble	-4.52	0.00907	3.02e-05	Moderately soluble	High	No	No	Yes	No	No	Yes	Yes	-6.56	0	0	0	0	0	0.55	0	0	0	3.21
GSK-330	CC[C@@H](C(C)C)CC[C@H]([C@H]1CC[C@H]2[C@]1(C)CC[C@@H]1[C@@H]2CC=C2[C@]1(C)CC[C@H](C2)O[C@@H]1O[C@H](CO)[C@H]([C@@H]([C@H]1O)O)O)C	C35H60O6	576.85	41	0	0.94	9	6	4	165.61	99.38	4.83	7.74	5.85	3.96	5.02	5.48	-7.7	1.15e-05	2e-08	Poorly soluble	-9.67	1.23e-07	2.14e-10	Poorly soluble	-4.4	0.0228	3.94e-05	Moderately soluble	Low	No	No	No	No	No	No	No	-4.32	1	4	0	0	1	0.55	0	1	3	8.02
GSK-331	CC[C@@H](C(C)C)CC[C@H]([C@H]1CC[C@H]2[C@]1(C)CC[C@@H]1[C@@H]2CC=C2[C@]1(C)CC[C@H](C2)O)C	C29H50O	414.71	30	0	0.93	6	1	1	133.23	20.23	5.09	9.34	8.02	6.73	7.04	7.25	-7.9	5.23e-06	1.26e-08	Poorly soluble	-9.67	8.9e-08	2.15e-10	Poorly soluble	-6.19	0.000269	6.49e-07	Poorly soluble	Low	No	No	No	No	No	No	No	-2.2	1	3	0	1	2	0.55	0	1	2	6.3
GSK-332	COc1cc(ccc1O)c1oc2cc(O)cc(c2c(=O)c1O)O	C16H12O7	316.26	23	16	0.06	2	7	4	82.5	120.36	2.35	1.87	2.29	-0.31	2.06	1.65	-3.36	0.138	0.000435	Soluble	-4.02	0.0303	9.57e-05	Moderately soluble	-3.94	0.0365	0.000115	Soluble	High	No	No	Yes	No	No	Yes	Yes	-6.9	0	0	0	0	0	0.55	0	0	0	3.26
GSK-333	CC(=C)[C@@H]1CC[C@]2([C@H]1[C@H]1CC[C@H]3[C@@]([C@]1(C)CC2)(C)CC[C@@H]1[C@]3(C)CC[C@@H](C1(C)C)O)C	C30H50O	426.72	31	0	0.93	1	1	1	135.14	20.23	4.76	9.87	8.02	6.92	6.82	7.28	-8.64	9.83e-07	2.3e-09	Poorly soluble	-10.22	2.58e-08	6.05e-11	Insoluble	-6.74	7.69e-05	1.8e-07	Poorly soluble	Low	No	No	No	No	No	No	No	-1.9	1	3	0	1	2	0.55	0	1	2	5.49
GSK-334	COc1ccc2c(c1)OC[C@@H]1[C@H]2Oc2c1ccc(c2OC)OC	C18H18O5	314.33	23	12	0.33	3	5	0	84.13	46.15	3.22	2.91	3	1.79	3.3	2.84	-3.81	0.0487	0.000155	Soluble	-3.54	0.0906	0.000288	Soluble	-5.12	0.00237	7.53e-06	Moderately soluble	High	Yes	Yes	Yes	Yes	No	Yes	Yes	-6.15	0	0	0	0	0	0.55	0	0	0	3.81
GSK-335	Oc1cccnc1C	C6H7NO	109.13	8	6	0.17	0	2	1	31.23	33.12	1.12	0.9	1.1	0.13	1.38	0.92	-1.64	2.51	0.023	Very soluble	-1.18	7.2	0.066	Very soluble	-1.77	1.84	0.0169	Soluble	High	Yes	No	No	No	No	No	No	-6.33	0	3	0	0	1	0.55	0	0	1	1.03
GSK-336	OC[C@H]1O[C@@H](OC([C@H]2Oc3c(C2)c(OC)c2c(c3)oc(cc2=O)C)(C)C)[C@@H]([C@H]([C@@H]1O)O)O	C22H28O10	452.45	32	10	0.59	5	10	4	111.29	148.05	2.63	0.3	0.01	-1.43	1.27	0.56	-2.74	0.832	0.00184	Soluble	-2.97	0.483	0.00107	Soluble	-2.71	0.892	0.00197	Soluble	Low	No	Yes	No	No	No	No	No	-8.85	0	0	1	1	0	0.55	0	0	1	5.59
GSK-337	OC[C@H]1O[C@@H](Oc2cc([C@@H]3COc4c(C3)ccc(c4)O)c(c(c2OC)OC)O[C@H]2O[C@H](CO)[C@H]([C@@H]([C@H]2O)O)O)[C@@H]([C@H]([C@@H]1O)O)O	C29H38O16	642.6	45	12	0.59	9	16	9	148.38	246.68	1.78	-1.06	-2.51	-3.23	-1.76	-1.36	-2.76	1.12	0.00174	Soluble	-3.63	0.15	0.000234	Soluble	-0.22	389	0.605	Soluble	Low	No	Yes	No	No	No	No	No	-10.97	3	4	1	1	4	0.17	0	0	2	6.71
GSK-338	OC[C@H]1O[C@@H](Oc2c(cc(c(c2OC)OC)O)[C@@H]2COc3c(C2)ccc(c3)O)[C@@H]([C@H]([C@@H]1O)O)O	C23H28O11	480.46	34	12	0.48	6	11	6	116.26	167.53	2.08	0.75	0.01	-1.13	0.33	0.41	-3.16	0.335	0.000697	Soluble	-3.85	0.0682	0.000142	Soluble	-2.02	4.54	0.00944	Soluble	Low	No	Yes	No	No	No	No	No	-8.7	2	1	1	1	3	0.17	0	0	1	5.51
GSK-339	OC[C@H]1O[C@@H](Oc2ccc3c(c2)occ(c3=O)c2ccc(c(c2O)OC)OC)[C@@H]([C@H]([C@@H]1O)O)O	C23H24O11	476.43	34	16	0.35	6	11	5	117.07	168.28	2.89	0.61	0.36	-1.67	0.97	0.63	-3.13	0.353	0.000741	Soluble	-3.72	0.0912	0.000191	Soluble	-3.48	0.158	0.000333	Soluble	Low	No	Yes	No	No	No	No	Yes	-8.77	1	0	1	1	2	0.55	0	0	1	5.39
GSK-340	COc1c(OC)ccc(c1O)c1coc2c(c1=O)ccc(c2)O	C17H14O6	314.29	23	16	0.12	3	6	2	84.95	89.13	2.37	2.41	2.89	0.47	3.07	2.24	-3.62	0.0748	0.000238	Soluble	-3.92	0.0375	0.000119	Soluble	-5.22	0.00191	6.08e-06	Moderately soluble	High	No	No	Yes	No	Yes	Yes	Yes	-6.51	0	0	0	0	0	0.55	0	0	0	3.16
GSK-341	COc1ccc2c(c1)OC[C@H](C2)c1ccc(c(c1O)OC)OC	C18H20O5	316.35	23	12	0.33	4	5	1	86.58	57.15	3.29	3.23	3.14	1.79	3.45	2.98	-3.96	0.0348	0.00011	Soluble	-4.1	0.0249	7.89e-05	Moderately soluble	-5.04	0.00286	9.04e-06	Moderately soluble	High	Yes	No	Yes	No	No	Yes	Yes	-5.94	0	0	0	0	0	0.55	0	0	0	3.48
GSK-342	OC[C@H]1O[C@@H](Oc2ccc3c(c2)OC[C@@H]2[C@H]3Oc3c2ccc(c3OC)OC)[C@@H]([C@H]([C@@H]1O)O)O	C23H26O10	462.45	33	12	0.48	5	10	4	111.78	136.3	2.59	0.78	0.17	-0.64	0.63	0.71	-3.14	0.337	0.000728	Soluble	-3.22	0.277	0.000599	Soluble	-2.7	0.929	0.00201	Soluble	High	No	Yes	No	No	No	No	No	-8.57	0	0	0	1	0	0.55	0	0	1	5.41
GSK-343	COc1ccc2c(c1OC)O[C@@H]1[C@H]2COc2c1ccc(c2)O	C17H16O5	300.31	22	12	0.29	2	5	1	79.66	57.15	2.76	2.58	2.69	1.55	2.78	2.47	-3.6	0.0756	0.000252	Soluble	-3.43	0.112	0.000373	Soluble	-4.43	0.0112	3.74e-05	Moderately soluble	High	Yes	Yes	Yes	Yes	No	Yes	Yes	-6.3	0	0	0	0	0	0.55	0	0	0	3.7
GSK-344	CCCCC[C@H](/C=C/C=C/CCCCCCCC(=O)O)O	C18H32O3	296.44	21	0	0.72	14	3	2	90.63	57.53	3.77	5.35	4.86	3.59	5.04	4.52	-4.12	0.0223	7.51e-05	Moderately soluble	-6.31	0.000145	4.89e-07	Poorly soluble	-3.74	0.0542	0.000183	Soluble	High	Yes	No	Yes	No	Yes	Yes	No	-4.31	0	0	1	0	1	0.85	0	1	2	4.01
GSK-345	OC[C@H]([C@H]([C@@H](C=O)O)O)O	C5H10O5	150.13	10	0	0.8	4	5	4	31	97.99	0.26	-2.32	-2.74	-2.48	-1.29	-1.71	0.95	1350	9.01	Highly soluble	0.8	944	6.29	Highly soluble	1.94	13000	86.9	Soluble	Low	No	No	No	No	No	No	No	-8.86	0	3	0	0	2	0.55	0	1	1	2.81
GSK-346	O=C[C@@H]([C@H]([C@H]([C@@H](C(=O)O)O)O)O)O	C6H10O7	194.14	13	0	0.67	5	7	5	37.57	135.29	-0.11	-2.57	-3.29	-3.01	-1.95	-2.19	0.91	1560	8.04	Highly soluble	0.27	365	1.88	Highly soluble	2.9	154000	793	Soluble	Low	No	No	No	No	No	No	No	-9.31	0	2	0	1	2	0.56	0	1	1	3.26
GSK-347	O=C[C@@H]([C@H]([C@@H]([C@@H](C(=O)O)O)O)O)O	C6H10O7	194.14	13	0	0.67	5	7	5	37.57	135.29	-0.83	-2.57	-3.29	-3.01	-1.95	-2.33	0.91	1560	8.04	Highly soluble	0.27	365	1.88	Highly soluble	2.9	154000	793	Soluble	Low	No	No	No	No	No	No	No	-9.31	0	2	0	1	2	0.56	0	1	1	3.26
GSK-348	O=C[C@H]([C@@H]([C@@H]([C@@H](O)C)O)O)O	C6H12O5	164.16	11	0	0.83	4	5	4	35.8	97.99	-0.03	-2.38	-2.35	-2.1	-1.1	-1.59	0.91	1320	8.05	Highly soluble	0.86	1190	7.26	Highly soluble	1.9	13000	79.3	Soluble	Low	No	No	No	No	No	No	No	-8.99	0	2	0	0	2	0.55	0	1	1	3.11
GSK-349	COC(=O)c1cc(OC)c2c(c1c1c(cc(c3c1OCO3)OC)C(=O)OC)OCO2	C20H18O10	418.35	30	12	0.3	7	10	0	99.55	107.98	3.54	2.82	2.4	1.11	3.29	2.63	-4.04	0.0378	9.03e-05	Moderately soluble	-4.75	0.00752	1.8e-05	Moderately soluble	-4.74	0.0077	1.84e-05	Moderately soluble	High	No	No	Yes	Yes	Yes	No	Yes	-6.85	0	0	0	0	0	0.55	0	1	1	3.6
GSK-350	NCCCC(=O)O	C4H9NO2	103.12	7	0	0.75	3	3	2	25.82	63.32	0.72	-3.17	-0.19	-0.39	-0.56	-0.72	1.72	5360	52	Highly soluble	2.41	26400	256	Highly soluble	-0.04	95.1	0.923	Soluble	High	No	No	No	No	No	No	No	-9.18	0	3	0	0	3	0.55	0	0	1	1
GSK-351	COc1cc(/C=C\C(=O)O)ccc1O	C10H10O4	194.18	14	6	0.1	3	4	2	51.63	66.76	1.62	1.51	1.39	1	1.26	1.36	-2.11	1.49	0.00768	Soluble	-2.52	0.586	0.00302	Soluble	-1.42	7.43	0.0383	Soluble	High	Yes	No	No	No	No	No	No	-6.41	0	0	0	0	1	0.85	0	1	1	1.93
GSK-352	Oc1ccc(cc1)c1coc2c(c1=O)ccc(c2)O	C15H10O4	254.24	19	16	0	1	4	2	71.97	70.67	1.77	2.47	2.87	1.08	3.02	2.24	-3.53	0.0751	0.000295	Soluble	-3.6	0.0641	0.000252	Soluble	-4.98	0.00264	1.04e-05	Moderately soluble	High	Yes	No	Yes	No	No	Yes	Yes	-6.1	0	0	0	0	0	0.55	0	0	0	2.79
GSK-353	OC[C@H]1O[C@@H](Oc2ccc3c(c2)occ(c3=O)c2ccc(cc2)OC)[C@@H]([C@H]([C@@H]1O)O)O	C22H22O9	430.4	31	16	0.32	5	9	4	108.56	138.82	2.65	0.99	0.65	-0.89	1.36	0.95	-3.18	0.282	0.000654	Soluble	-3.49	0.138	0.000321	Soluble	-3.97	0.0459	0.000107	Soluble	High	No	Yes	No	No	No	No	Yes	-8.22	0	0	0	1	0	0.55	0	0	1	5.12
GSK-354	COc1ccc(cc1)c1coc2c(c1=O)ccc(c2)O	C16H12O4	268.26	20	16	0.06	2	4	1	76.44	59.67	2.49	2.8	3.17	1.33	3.52	2.66	-3.73	0.0503	0.000187	Soluble	-3.71	0.0523	0.000195	Soluble	-5.68	0.000558	2.08e-06	Moderately soluble	High	Yes	No	Yes	No	No	Yes	Yes	-5.95	0	0	0	0	0	0.55	0	0	0	2.81
GSK-355	OC[C@H]1O[C@@H](O[C@H]2[C@@H](O[C@@H]([C@H]([C@@H]2O)O)C(=O)O)O[C@H]2CC[C@]3([C@H]([C@@]2(C)CO)CC[C@@]2([C@@H]3CC=C3[C@@]2(C)CC[C@@]2([C@H]3CC(C)(C)C[C@H]2O)C)C)C)[C@@H]([C@H]([C@H]1O)O)O[C@@H]1O[C@@H](C)[C@@H]([C@H]([C@H]1O)O)O	C48H78O18	943.12	66	0	0.94	9	18	11	233.8	294.98	3.83	2.37	0.7	-1.4	-0.66	0.97	-6.59	0.000244	2.59e-07	Poorly soluble	-8.21	5.88e-06	6.24e-09	Poorly soluble	-0.35	418	0.444	Soluble	Low	No	Yes	No	No	No	No	No	-10.37	3	3	1	1	5	0.11	0	2	2	10
GSK-356	OCC[N](C)(C)C	C5H14NO	104.17	7	0	1	2	1	1	31.26	23.47	-2.14	-0.4	-0.29	0.23	-0.57	-0.64	-0.1	82.4	0.791	Very soluble	0.37	245	2.35	Highly soluble	-1.26	5.74	0.0551	Soluble	Low	No	No	No	No	No	No	No	-7.22	0	2	0	0	1	0.55	0	0	1	1
GSK-357	NC(=N)NOCC[C@@H](C(=O)O)N	C5H12N4O3	176.17	12	0	0.6	6	5	5	40.81	134.45	0.04	-4.13	-1.8	-3.57	-2.28	-2.35	2.07	20500	116	Highly soluble	1.91	14400	81.5	Highly soluble	0.72	931	5.28	Soluble	Low	No	No	No	No	No	No	No	-10.31	0	1	0	1	2	0.55	0	3	1	3.38
GSK-358	COc1cc(cc(c1O)OC)[C@H]1OC[C@H]2[C@@H]1CO[C@@H]2c1cc(OC)c(c(c1)OC)O	C22H26O8	418.44	30	12	0.45	6	8	2	107.89	95.84	3.52	2.23	2.56	0.56	2.78	2.33	-3.74	0.0763	0.000182	Soluble	-3.88	0.0554	0.000132	Soluble	-4.4	0.0167	3.98e-05	Moderately soluble	High	No	Yes	No	No	No	Yes	No	-7.27	0	0	0	0	0	0.55	0	0	1	4.36
GSK-359	OC(=O)/C=C\c1ccc(cc1)O	C9H8O3	164.16	12	6	0	2	3	2	45.13	57.53	0.95	1.46	1.38	1.28	1.22	1.26	-2.02	1.58	0.00965	Soluble	-2.27	0.873	0.00532	Soluble	-1.28	8.67	0.0528	Soluble	High	Yes	No	No	No	No	No	No	-6.26	0	0	0	0	1	0.85	0	1	1	1.61
GSK-360	COc1c(OC)ccc2c1C(=O)[C@H](CO2)c1ccc(cc1O)O	C17H16O6	316.31	23	12	0.24	3	6	2	82.53	85.22	2.03	2.3	2.47	0.66	2.61	2.01	-3.44	0.115	0.000365	Soluble	-3.73	0.0592	0.000187	Soluble	-4.23	0.0186	5.89e-05	Moderately soluble	High	No	Yes	Yes	No	No	No	Yes	-6.6	0	0	0	0	0	0.55	0	0	0	3.49
GSK-361	OC[C@@H]([C@@H]([C@@H](Cn1c2cc(C)c(cc2nc2c1nc(=O)[nH]c2=O)C)O)O)O	C17H20N4O6	376.36	27	14	0.41	5	8	5	96.99	161.56	0.91	-1.46	-1.68	-0.54	1.09	-0.34	-1.31	18.5	0.0493	Very soluble	-1.43	14	0.0372	Very soluble	-2.62	0.903	0.0024	Soluble	Low	No	No	No	No	No	No	No	-9.63	0	1	1	1	1	0.55	0	1	1	3.84
GSK-362	OC[C@H]1O[C@@H](O[C@H]2C[C@@H]3[C@]4(C)C[C@@H]([C@@H]([C@@]4(C)CC[C@]43[C@@]3([C@H]2C(C)(C)[C@H](CC3)O[C@@H]2OC[C@H]([C@@H]([C@H]2OC(=O)C)OC(=O)C)O)C4)[C@@]2(C)CC[C@H](O2)C(O)(C)C)O)[C@@H]([C@H]([C@@H]1O)O)O	C45H72O16	869.04	61	0	0.96	11	16	7	216.42	240.36	4.31	2.41	1.87	-0.03	1.61	2.03	-6.02	0.000829	9.54e-07	Poorly soluble	-7.1	6.91e-05	7.95e-08	Poorly soluble	-2.28	4.59	0.00528	Soluble	Low	No	Yes	No	No	No	No	No	-9.89	3	3	2	1	5	0.17	0	2	2	9.92
GSK-363	CC(=O)O[C@H]1[C@@H](OC[C@H]([C@@H]1OC(=O)C)O)O[C@H]1CC[C@]23[C@@H](C1(C)C)[C@@H](O)C[C@H]1[C@@]3(C2)CC[C@]2([C@@]1(C)C[C@@H]([C@@H]2[C@@]1(C)CC[C@H](O1)C(O)(C)C)O)C	C39H62O11	706.9	50	0	0.95	8	11	4	184.04	161.21	4.86	4	4.04	2.28	3.67	3.77	-6.21	0.000431	6.1e-07	Poorly soluble	-7.09	5.78e-05	8.18e-08	Poorly soluble	-4.14	0.0512	7.24e-05	Moderately soluble	Low	No	Yes	No	No	No	No	No	-7.77	2	3	1	1	3	0.17	0	2	3	8.82
GSK-364	OC[C@H]1O[C@@H](O[C@H]2C[C@H]3[C@]4([C@@]5([C@H]2C(C)(C)[C@H](CC5)O[C@@H]2OC[C@H]([C@@H]([C@H]2OC(=O)C)O)O)C4)CC[C@]2([C@@]3(C)C[C@@H]([C@@H]2[C@@]2(C)CC[C@H](O2)C(O)(C)C)O)C)[C@@H]([C@H]([C@@H]1O)O)O	C43H70O15	827.01	58	0	0.98	9	15	8	206.68	234.29	3.97	1.83	1.29	-0.33	1.07	1.57	-5.53	0.00246	2.98e-06	Moderately soluble	-6.37	0.000353	4.26e-07	Poorly soluble	-1.7	16.7	0.0201	Soluble	Low	No	Yes	No	No	No	No	No	-10.05	3	3	1	1	5	0.17	0	1	2	9.73
GSK-365	CC(=O)O[C@H]1[C@@H](OC[C@H]([C@@H]1O)O)O[C@H]1CC[C@]23[C@@H](C1(C)C)[C@@H](O)C[C@H]1[C@@]3(C2)CC[C@]2([C@@]1(C)C[C@@H]([C@@H]2[C@@]1(C)CC[C@H](O1)C(O)(C)C)O)C	C37H60O10	664.87	47	0	0.97	6	10	5	174.3	155.14	4.73	3.43	3.47	1.99	3.14	3.35	-5.73	0.00125	1.87e-06	Moderately soluble	-6.37	0.000285	4.28e-07	Poorly soluble	-3.55	0.187	0.000281	Soluble	Low	No	Yes	No	No	No	No	No	-7.92	1	3	1	1	2	0.55	0	1	1	8.64
GSK-366	OC[C@H]1O[C@@H](O[C@H]2[C@@H](OC[C@H]([C@@H]2O)O)O[C@@H]2CC[C@]34[C@@H](C2(C)C)[C@H](O)C[C@H]2[C@@]4(C3)CC[C@]3([C@@]2(C)C[C@H]([C@@H]3[C@@]2(C)CC[C@H](O2)C(O)(C)C)O)C)[C@@H]([C@H]([C@@H]1O)O)O	C41H68O14	784.97	55	0	1	7	14	9	196.95	228.22	4.11	1.26	0.72	-0.59	0.52	1.21	-5.04	0.00718	9.15e-06	Moderately soluble	-5.65	0.00175	2.23e-06	Moderately soluble	-1.11	60.5	0.0771	Soluble	Low	No	Yes	No	No	No	No	No	-10.19	3	3	1	1	5	0.17	0	1	1	9.78
GSK-367	O[C@H]1[C@H](O)CO[C@H]([C@@H]1O)O[C@@H]1CC[C@]23[C@@H](C1(C)C)[C@H](O)C[C@H]1[C@@]3(C2)CC[C@]2([C@@]1(C)C[C@H]([C@@H]2[C@@]1(C)CC[C@H](O1)C(O)(C)C)O)C	C35H58O9	622.83	44	0	1	4	9	6	164.56	149.07	3.57	2.85	2.9	1.74	2.6	2.73	-5.23	0.00364	5.85e-06	Moderately soluble	-5.64	0.00143	2.3e-06	Moderately soluble	-2.96	0.686	0.0011	Soluble	Low	No	Yes	No	No	No	No	No	-8.08	2	3	1	1	2	0.17	0	1	1	8.65
GSK-368	OC[C@H]1O[C@@H](O[C@H]2C[C@@H]3[C@]4([C@@]5([C@@H]2C(C)(C)[C@@H](CC5)O[C@@H]2OC[C@H]([C@@H]([C@H]2O)O)O)C4)CC[C@]2([C@@]3(C)C[C@@H]([C@@H]2[C@@]2(C)CC[C@H](O2)C(O)(C)C)O)C)[C@@H]([C@H]([C@@H]1O)O)O	C41H68O14	784.97	55	0	1	7	14	9	196.95	228.22	4.03	1.26	0.72	-0.59	0.52	1.19	-5.04	0.00718	9.15e-06	Moderately soluble	-5.65	0.00175	2.23e-06	Moderately soluble	-1.11	60.5	0.0771	Soluble	Low	No	Yes	No	No	No	No	No	-10.19	3	3	1	1	5	0.17	0	1	1	9.73
GSK-369	O[C@H]1[C@H](O)CO[C@H]([C@@H]1O)O[C@@H]1CC[C@]23[C@H](C1(C)C)[C@@H](O)C[C@@H]1[C@@]3(C2)CC[C@]2([C@@]1(C)C[C@@H]([C@@H]2[C@@]1(C)CC[C@H](O1)C(O)(C)C)O)C	C35H58O9	622.83	44	0	1	4	9	6	164.56	149.07	4.16	2.85	2.9	1.74	2.6	2.85	-5.23	0.00364	5.85e-06	Moderately soluble	-5.64	0.00143	2.3e-06	Moderately soluble	-2.96	0.686	0.0011	Soluble	Low	No	Yes	No	No	No	No	No	-8.08	2	3	1	1	2	0.17	0	1	1	8.65
GSK-370	OC[C@H]1O[C@@H](O[C@H]2C[C@H]3[C@]4([C@@]5([C@H]2C(C)(C)[C@H](CC5)O[C@@H]2OC[C@H]([C@@H]([C@H]2O)O)O)C4)CC[C@]2([C@@]3(C)C[C@@H]([C@@H]2[C@]2(C)CC[C@@H](O2)C(O)(C)C)O)C)[C@@H]([C@H]([C@@H]1O)O)O	C41H68O14	784.97	55	0	1	7	14	9	196.95	228.22	3.96	1.26	0.72	-0.59	0.52	1.18	-5.04	0.00718	9.15e-06	Moderately soluble	-5.65	0.00175	2.23e-06	Moderately soluble	-1.11	60.5	0.0771	Soluble	Low	No	Yes	No	No	No	No	No	-10.19	3	3	1	1	5	0.17	0	1	1	9.73
GSK-371	O[C@H]1[C@H](O)CO[C@H]([C@@H]1O)O[C@H]1CC[C@]23[C@@H](C1(C)C)[C@@H](O)C[C@H]1[C@@]3(C2)CC[C@]2([C@@]1(C)C[C@@H]([C@@H]2[C@]1(C)CC[C@@H](O1)C(O)(C)C)O)C	C35H58O9	622.83	44	0	1	4	9	6	164.56	149.07	3.95	2.85	2.9	1.74	2.6	2.81	-5.23	0.00364	5.85e-06	Moderately soluble	-5.64	0.00143	2.3e-06	Moderately soluble	-2.96	0.686	0.0011	Soluble	Low	No	Yes	No	No	No	No	No	-8.08	2	3	1	1	2	0.17	0	1	1	8.65
GSK-372	OC[C@H]1O[C@@H](Oc2ccc3c(c2)OC[C@@H](C3)c2ccc(c(c2OC)O)OC)[C@@H]([C@H]([C@@H]1O)O)O	C23H28O10	464.46	33	12	0.48	6	10	5	114.23	147.3	2.54	1.1	0.31	-0.64	0.8	0.82	-3.29	0.241	0.000518	Soluble	-3.79	0.076	0.000164	Soluble	-2.62	1.12	0.00242	Soluble	Low	No	Yes	No	No	No	No	No	-8.35	0	0	1	1	0	0.55	0	0	1	5.39
GSK-373	COc1c(ccc(c1O)OC)[C@H]1COc2c(C1)ccc(c2)O	C17H18O5	302.32	22	12	0.29	3	5	2	82.11	68.15	2.77	2.91	2.83	1.55	2.92	2.6	-3.75	0.0534	0.000176	Soluble	-4	0.0301	9.95e-05	Moderately soluble	-4.35	0.0136	4.49e-05	Moderately soluble	High	Yes	Yes	Yes	No	No	Yes	Yes	-6.08	0	0	0	0	0	0.55	0	0	0	3.36
GSK-374	O[C@H]1[C@H](O)CO[C@H]([C@@H]1O[C@@H]1O[C@@H](C)[C@@H]([C@@H]([C@H]1O)O)O)O[C@@H]1CC[C@]23[C@@H](C1(C)C)[C@H](O)C[C@H]1[C@@]3(C2)CC[C@]2([C@@]1(C)C[C@H]([C@@H]2[C@]1(C)CC[C@H](O1)C(O)(C)C)O)C	C41H68O13	768.97	54	0	1	6	13	8	195.78	207.99	4.48	1.76	1.75	0.15	1.12	1.85	-5.32	0.00368	4.78e-06	Moderately soluble	-5.75	0.00138	1.8e-06	Moderately soluble	-1.7	15.5	0.0201	Soluble	Low	No	Yes	No	No	No	No	No	-9.74	3	3	1	1	5	0.17	0	1	1	9.73
GSK-375	Oc1cc(O)c2c(c1)oc(c(c2=O)O[C@@H]1O[C@H](CO[C@@H]2O[C@@H](C)[C@@H]([C@H]([C@H]2O)O)O)[C@H]([C@@H]([C@H]1O)O)O)c1ccc(c(c1)O)O	C27H30O16	610.52	43	16	0.44	6	16	10	141.38	269.43	0.46	-0.33	-1.69	-3.89	-2.11	-1.51	-3.3	0.308	0.000505	Soluble	-4.87	0.0083	1.36e-05	Moderately soluble	-0.29	315	0.515	Soluble	Low	No	Yes	No	No	No	No	No	-10.26	3	4	1	1	4	0.17	1	1	1	6.52
GSK-376	OC[C@H]1[C@H](CO[C@@H]1c1ccc(c(c1)OC)O)Cc1ccc(c(c1)OC)O	C20H24O6	360.4	26	12	0.4	6	6	3	97.09	88.38	3.12	2.4	2.33	1.17	2.86	2.38	-3.53	0.106	0.000294	Soluble	-3.9	0.0456	0.000127	Soluble	-4.37	0.0155	4.31e-05	Moderately soluble	High	No	Yes	No	No	No	Yes	No	-6.79	0	0	0	0	0	0.55	0	0	1	3.94
GSK-377	COc1ccc(cc1O)c1coc2c(c1=O)ccc(c2)O	C16H12O5	284.26	21	16	0.06	2	5	2	78.46	79.9	2.4	2.44	2.88	0.77	3.03	2.3	-3.57	0.0763	0.000268	Soluble	-3.76	0.0493	0.000173	Soluble	-5.1	0.00225	7.91e-06	Moderately soluble	High	No	No	Yes	No	No	Yes	Yes	-6.3	0	0	0	0	0	0.55	0	0	0	2.95
GSK-378	OC[C@H]1O[C@@H](Oc2ccc3c(c2)occ(c3=O)c2ccc(c(c2)O)OC)[C@@H]([C@H]([C@@H]1O)O)O	C22H22O10	446.4	32	16	0.32	5	10	5	110.58	159.05	2.65	0.64	0.35	-1.39	0.89	0.63	-3.05	0.397	0.000889	Soluble	-3.56	0.124	0.000278	Soluble	-3.38	0.185	0.000415	Soluble	Low	No	Yes	No	No	No	No	Yes	-8.57	0	0	1	1	1	0.55	0	0	1	5.2
GSK-379	O[C@H]1[C@H](O)CO[C@H]([C@@H]1O)O[C@H]1C[C@H]2[C@]3(C)C[C@@H]([C@@H]([C@@]3(C)CC[C@]32[C@@]2([C@@H]1C(C)(C)[C@H](CC2)O[C@@H]1OC[C@H]([C@@H]([C@H]1O[C@@H]1O[C@@H](C)[C@@H]([C@H]([C@H]1O)O)O)O)O)C3)[C@@]1(C)CC[C@H](O1)C(O)(C)C)O	C46H76O17	901.09	63	0	1	8	17	10	222.2	266.91	4.92	0.23	0.22	-1.56	-0.5	0.66	-5.04	0.00815	9.04e-06	Moderately soluble	-5.39	0.00363	4.03e-06	Moderately soluble	-0.27	479	0.532	Soluble	Low	No	Yes	No	No	No	No	No	-11.63	3	3	1	1	5	0.17	0	1	2	10
GSK-380	OC[C@H]([C@@H]([C@H](C=O)O)O)O	C5H10O5	150.13	10	0	0.8	4	5	4	31	97.99	-0.58	-2.32	-2.74	-2.48	-1.29	-1.88	0.95	1350	9.01	Highly soluble	0.8	944	6.29	Highly soluble	1.94	13000	86.9	Soluble	Low	No	No	No	No	No	No	No	-8.86	0	3	0	0	2	0.55	0	1	1	2.81
GSK-381	OC(=O)c1cccnc1	C6H5NO2	123.11	9	6	0	1	3	1	31.2	50.19	0.86	0.36	0.78	-1.13	0.75	0.32	-1.26	6.81	0.0553	Very soluble	-0.98	12.9	0.105	Very soluble	-1.35	5.46	0.0444	Soluble	High	Yes	No	No	No	No	No	No	-6.8	0	3	0	0	1	0.85	0	0	1	1
GSK-382	OC[C@H]1O[C@@H](Oc2c(oc3c(c2=O)c(O)cc(c3)OC)c2ccc(cc2)O)[C@@H]([C@H]([C@@H]1O)O)O	C22H22O11	462.4	33	16	0.32	5	11	6	112.6	179.28	2.16	1.04	0.06	-1.89	0.42	0.36	-3.39	0.188	0.000407	Soluble	-4.4	0.0186	4.02e-05	Moderately soluble	-2.79	0.748	0.00162	Soluble	Low	No	Yes	No	No	No	No	Yes	-8.38	2	0	1	1	3	0.17	0	0	1	5.42
GSK-383	O[C@H]1[C@H](C)O[C@H]([C@@H]([C@@H]1O)O)O	C6H12O5	164.16	11	0	1	0	5	4	34.57	90.15	0.85	-2.09	-2.19	-1.94	-1.72	-1.42	0.46	472	2.88	Highly soluble	0.72	870	5.3	Highly soluble	2.06	19100	116	Soluble	High	No	Yes	No	No	No	No	No	-8.79	0	2	0	0	2	0.55	0	0	1	4.05
GSK-384	OC[C@H]1O[C@@H](OC([C@@H]2CC[C@](O2)(C)[C@H]2[C@H](O)C[C@@]3([C@]2(C)CC[C@@]24[C@@H]3C[C@H]([C@H]3[C@]4(C2)CC[C@H](C3(C)C)O[C@@H]2OC[C@H]([C@@H]([C@H]2O[C@@H]2O[C@@H](C)[C@@H]([C@H]([C@H]2O)O)O)O)O)O)C)(C)C)[C@@H]([C@H]([C@@H]1O)O)O	C47H78O18	931.11	65	0	1	9	18	11	228.17	287.14	4.14	0.17	-0.42	-2.12	-0.96	0.16	-5.13	0.00697	7.48e-06	Moderately soluble	-5.76	0.00163	1.75e-06	Moderately soluble	0.18	1410	1.51	Soluble	Low	No	Yes	No	No	No	No	No	-11.86	3	4	1	1	5	0.17	0	1	2	10
GSK-385	O[C@H]1[C@H](O)CO[C@H]([C@@H]1O[C@@H]1O[C@@H](C)[C@@H]([C@H]([C@H]1O)O)O)O[C@@H]1CC[C@]23[C@@H](C1(C)C)[C@H](O)C[C@H]1[C@@]3(C2)CC[C@]2([C@@]1(C)C[C@H]([C@@H]2[C@@]1(C)CC[C@H](O1)C(O)(C)C)O)C	C41H68O13	768.97	54	0	1	6	13	8	195.78	207.99	4.28	1.76	1.75	0.15	1.12	1.81	-5.32	0.00368	4.78e-06	Moderately soluble	-5.75	0.00138	1.8e-06	Moderately soluble	-1.7	15.5	0.0201	Soluble	Low	No	Yes	No	No	No	No	No	-9.74	3	3	1	1	5	0.17	0	1	1	9.73
GSK-386	OC[C@H]1O[C@@H](OC([C@@H]2CC[C@](O2)(C)[C@H]2[C@H](O)C[C@@]3([C@]2(C)CC[C@@]24[C@@H]3C[C@H]([C@H]3[C@]4(C2)CC[C@H](C3(C)C)O[C@@H]2OC[C@H]([C@@H]([C@H]2O[C@@H]2O[C@@H](C)[C@@H]([C@H]([C@H]2O)O)O)OC(=O)C)O)O)C)(C)C)[C@@H]([C@H]([C@@H]1O)O)O	C49H80O19	973.15	68	0	0.98	11	19	10	237.91	293.21	4.65	0.74	0.15	-1.86	-0.41	0.65	-5.61	0.00237	2.43e-06	Moderately soluble	-6.48	0.000325	3.34e-07	Poorly soluble	-0.4	389	0.4	Soluble	Low	No	Yes	No	No	No	No	No	-11.71	3	3	2	1	5	0.17	0	1	2	10
GSK-387	CC(=O)O[C@H]1[C@H](O)CO[C@H]([C@@H]1O[C@@H]1O[C@@H](C)[C@@H]([C@H]([C@H]1O)O)O)O[C@@H]1CC[C@]23[C@@H](C1(C)C)[C@H](O)C[C@H]1[C@@]3(C2)CC[C@]2([C@@]1(C)C[C@H]([C@@H]2[C@@]1(C)CC[C@H](O1)C(O)(C)C)O)C	C43H70O14	811.01	57	0	0.98	8	14	7	205.52	214.06	4.15	2.33	2.32	0.41	1.66	2.18	-5.81	0.00126	1.56e-06	Moderately soluble	-6.46	0.000278	3.43e-07	Poorly soluble	-2.28	4.27	0.00526	Soluble	Low	No	Yes	No	No	No	No	No	-9.59	3	3	1	1	5	0.17	0	1	2	9.68
GSK-388	NC(=O)C[C@@H](C(=O)O)N	C4H8N2O3	132.12	9	0	0.5	3	4	3	28.73	106.41	-0.26	-3.41	-1.73	-3.99	-1.73	-2.22	1.69	6430	48.7	Highly soluble	1.75	7480	56.6	Highly soluble	1.1	1650	12.5	Soluble	High	No	No	No	No	No	No	No	-9.53	0	4	0	0	3	0.55	0	0	1	1.72
GSK-389	OC(=O)C[N](C)(C)C	C5H12NO2	118.15	8	0	0.8	2	2	1	31.87	40.54	-2.5	-0.13	-0.2	0.01	-0.91	-0.75	-0.36	51.7	0.438	Very soluble	-0.27	63.8	0.54	Very soluble	-0.82	17.7	0.15	Soluble	High	No	No	No	No	No	No	No	-7.11	0	2	0	0	1	0.55	0	0	1	1
GSK-390	O=c1ccc2c(o1)cccc2	C9H6O2	146.14	11	10	0	0	2	0	42.48	30.21	1.75	1.39	1.79	1.65	2.5	1.82	-2.29	0.742	0.00508	Soluble	-1.63	3.44	0.0235	Very soluble	-3.59	0.0377	0.000258	Soluble	High	Yes	No	Yes	No	No	No	No	-6.2	0	2	0	0	1	0.55	0	1	1	2.74
GSK-391	CC/C=C\C/C=C\C/C=C\CCCCCCCC(=O)O	C18H30O2	278.43	20	0	0.61	13	2	1	88.99	37.3	3.36	6.46	5.66	4.38	5.59	5.09	-4.78	0.00464	1.67e-05	Moderately soluble	-7.04	2.55e-05	9.16e-08	Poorly soluble	-3.96	0.0308	0.000111	Soluble	High	Yes	No	Yes	No	Yes	No	No	-3.41	1	1	1	0	1	0.85	0	1	2	3.03
GSK-392	OC(=O)CC[C@@H](C(=O)O)NC(=O)c1ccc(cc1)NCc1cnc2c(n1)c(=O)[nH]c(n2)N	C19H19N7O6	441.4	32	16	0.21	10	9	6	111.92	213.28	0.04	-1.08	-0.38	-0.62	0.24	-0.36	-1.61	10.9	0.0248	Very soluble	-2.91	0.544	0.00123	Soluble	-4.6	0.0112	2.54e-05	Moderately soluble	Low	No	No	No	No	No	No	No	-9.76	2	0	1	1	2	0.11	0	0	2	3.43
GSK-393	OC[C@H]1O[C@@H](O[C@H]2C[C@H]3[C@]4([C@@]5([C@H]2C(C)(C)[C@H](CC5)O[C@@H]2OC[C@H]([C@@H]([C@H]2OC(=O)C)OC(=O)C)OC(=O)C)C4)CC[C@]2([C@@]3(C)C[C@@H]([C@@H]2[C@@]2(C)CC[C@H](O2)C(O)(C)C)O)C)[C@@H]([C@H]([C@@H]1O)O)O	C47H74O17	911.08	64	0	0.94	13	17	6	226.16	246.43	5.08	2.98	2.44	0.28	2.17	2.59	-6.51	0.000283	3.1e-07	Poorly soluble	-7.82	1.38e-05	1.52e-08	Poorly soluble	-2.86	1.27	0.00139	Soluble	Low	No	Yes	No	No	No	No	No	-9.74	3	3	2	1	5	0.17	0	2	2	10
GSK-394	CC(=O)O[C@H]1[C@@H](OC[C@H]([C@@H]1OC(=O)C)OC(=O)C)O[C@H]1CC[C@]23[C@@H](C1(C)C)[C@@H](O)C[C@H]1[C@@]3(C2)CC[C@]2([C@@]1(C)C[C@@H]([C@@H]2[C@@]1(C)CC[C@H](O1)C(O)(C)C)O)C	C41H64O12	748.94	53	0	0.93	10	12	3	193.77	167.28	5.47	4.58	4.61	2.58	4.22	4.29	-6.71	0.000146	1.96e-07	Poorly soluble	-7.82	1.14e-05	1.52e-08	Poorly soluble	-4.73	0.014	1.87e-05	Moderately soluble	Low	No	Yes	No	No	No	No	Yes	-7.62	2	3	1	1	3	0.17	0	2	3	9.04
GSK-395	Oc1ccc(cc1)/C=C\C(=O)c1ccc(cc1O)O	C15H12O4	256.25	19	12	0	3	4	3	72.32	77.76	2.02	3.18	2.59	1.58	2.48	2.37	-3.7	0.0509	0.000199	Soluble	-4.48	0.00841	3.28e-05	Moderately soluble	-3.23	0.15	0.000586	Soluble	High	Yes	No	Yes	No	Yes	No	Yes	-5.61	0	0	0	0	0	0.55	0	1	0	2.52
GSK-396	COc1c(OC)ccc(c1O)[C@@H]1COc2c(C1)ccc(c2)O	C17H18O5	302.32	22	12	0.29	3	5	2	82.11	68.15	2.65	2.91	2.83	1.55	2.92	2.57	-3.75	0.0534	0.000176	Soluble	-4	0.0301	9.95e-05	Moderately soluble	-4.35	0.0136	4.49e-05	Moderately soluble	High	Yes	Yes	Yes	No	No	Yes	Yes	-6.08	0	0	0	0	0	0.55	0	0	0	3.37
GSK-397	OC[C@H]1O[C@@H](Oc2ccc3c(c2)OC[C@H](C3)c2ccc(c(c2O[C@@H]2O[C@H](CO)[C@H]([C@@H]([C@H]2O)O)O)OC)OC)[C@@H]([C@H]([C@@H]1O)O)O	C29H38O15	626.6	44	12	0.59	9	15	8	146.35	226.45	2.34	-0.7	-2.22	-2.76	-1.3	-0.93	-2.89	0.804	0.00128	Soluble	-3.58	0.165	0.000263	Soluble	-0.81	95.9	0.153	Soluble	Low	No	Yes	No	No	No	No	No	-10.62	3	4	1	1	4	0.17	0	0	2	6.66
GSK-398	OC[C@H]1O[C@@H](Oc2c(ccc(c2OC)OC)[C@@H]2COc3c(C2)ccc(c3)O)[C@@H]([C@H]([C@@H]1O)O)O	C23H28O10	464.46	33	12	0.48	6	10	5	114.23	147.3	2.5	1.1	0.31	-0.64	0.8	0.81	-3.29	0.241	0.000518	Soluble	-3.79	0.076	0.000164	Soluble	-2.62	1.12	0.00242	Soluble	Low	No	Yes	No	No	No	No	No	-8.35	0	0	1	1	0	0.55	0	0	1	5.47
GSK-399	CC(=C)[C@@H]1CC[C@]2([C@H]1[C@H]1CC[C@H]3[C@@]([C@]1(C)CC2)(C)CC[C@@H]1[C@]3(C)CCC(=O)C1(C)C)C	C30H48O	424.7	31	0	0.9	1	1	0	134.18	17.07	4.54	9.56	8.23	6.82	7.41	7.31	-8.43	1.58e-06	3.72e-09	Poorly soluble	-9.83	6.28e-08	1.48e-10	Poorly soluble	-7.44	1.54e-05	3.63e-08	Poorly soluble	Low	No	No	No	No	No	No	No	-2.1	1	3	0	1	2	0.55	0	1	2	5.38
GSK-400	COc1cc(O)c2c(c1)OCc1c2oc2c1c(O)cc(c2)OC	C17H14O6	314.29	23	15	0.18	2	6	2	83.22	81.29	2.85	2.76	3.27	0.85	3.03	2.55	-3.88	0.0416	0.000132	Soluble	-4.12	0.0237	7.54e-05	Moderately soluble	-4.9	0.00392	1.25e-05	Moderately soluble	High	No	Yes	Yes	No	Yes	Yes	Yes	-6.26	0	0	0	0	0	0.55	0	0	0	3.52
GSK-401	O=C(O[C@@H]1C[C@@](O)(C[C@H]([C@H]1O)O)C(=O)O)/C=C/c1ccc(c(c1)O)O	C16H18O9	354.31	25	6	0.38	5	9	6	83.5	164.75	0.87	-0.42	-0.75	-1.05	-0.61	-0.39	-1.62	8.5	0.024	Very soluble	-2.58	0.942	0.00266	Soluble	0.4	894	2.52	Soluble	Low	No	No	No	No	No	No	No	-8.76	1	1	1	1	2	0.11	1	2	1	4.16
GSK-402	COc1ccc(cc1O)/C=C/C(=O)O	C10H10O4	194.18	14	6	0.1	3	4	2	51.63	66.76	1.79	1.51	1.39	1	1.26	1.39	-2.11	1.49	0.00768	Soluble	-2.52	0.586	0.00302	Soluble	-1.42	7.43	0.0383	Soluble	High	Yes	No	No	No	No	No	No	-6.41	0	0	0	0	1	0.85	0	1	1	1.9
GSK-403	COc1ccc2c(c1)OC[C@@H]1[C@H]2Oc2c1ccc(c2OC)OC	C18H18O5	314.33	23	12	0.33	3	5	0	84.13	46.15	3.22	2.91	3	1.79	3.3	2.84	-3.81	0.0487	0.000155	Soluble	-3.54	0.0906	0.000288	Soluble	-5.12	0.00237	7.53e-06	Moderately soluble	High	Yes	Yes	Yes	Yes	No	Yes	Yes	-6.15	0	0	0	0	0	0.55	0	0	0	3.81
GSK-404	COc1cc(cc(c1O)OC)C1OCC2C1COC2c1cc(OC)c(c(c1)OC)O	C22H26O8	418.44	30	12	0.45	6	8	2	107.89	95.84	3.52	2.23	2.56	0.56	2.78	2.33	-3.74	0.0763	0.000182	Soluble	-3.88	0.0554	0.000132	Soluble	-4.4	0.0167	3.98e-05	Moderately soluble	High	No	Yes	No	No	No	Yes	No	-7.27	0	0	0	0	0	0.55	0	0	1	4.36
GSK-405	COc1ccc(cc1O)c1coc2c(c1=O)ccc(c2)O	C16H12O5	284.26	21	16	0.06	2	5	2	78.46	79.9	2.4	2.44	2.88	0.77	3.03	2.3	-3.57	0.0763	0.000268	Soluble	-3.76	0.0493	0.000173	Soluble	-5.1	0.00225	7.91e-06	Moderately soluble	High	No	No	Yes	No	No	Yes	Yes	-6.3	0	0	0	0	0	0.55	0	0	0	2.95
GSK-406	OC[C@H]1O[C@@H](O[C@H]2CC3[C@]4(C)C[C@@H]([C@@H]([C@@]4(C)CCC43[C@@]3(C2C(C)(C)[C@H](CC3)O[C@@H]2OC[C@H]([C@@H]([C@H]2OC(=O)C)O)OC(=O)C)C4)[C@@]2(C)CC[C@H](O2)C(O)(C)C)O)[C@@H]([C@H]([C@@H]1O)O)O	C45H72O16	869.04	61	0	0.96	11	16	7	216.42	240.36	4.73	2.41	1.87	-0.03	1.61	2.12	-6.02	0.000829	9.54e-07	Poorly soluble	-7.1	6.91e-05	7.95e-08	Poorly soluble	-2.28	4.59	0.00528	Soluble	Low	No	Yes	No	No	No	No	No	-9.89	3	3	2	1	5	0.17	0	2	2	9.92
GSK-407	OC[C@H]1O[C@@H](Oc2ccc3c(c2)OC[C@H](C3)c2ccc(c(c2O[C@@H]2O[C@H](CO)[C@H]([C@@H]([C@H]2O)O)O)OC)OC)[C@@H]([C@H]([C@@H]1O)O)O	C29H38O15	626.6	44	12	0.59	9	15	8	146.35	226.45	2.34	-0.7	-2.22	-2.76	-1.3	-0.93	-2.89	0.804	0.00128	Soluble	-3.58	0.165	0.000263	Soluble	-0.81	95.9	0.153	Soluble	Low	No	Yes	No	No	No	No	No	-10.62	3	4	1	1	4	0.17	0	0	2	6.66
GSK-408	CC(=C)[C@@H]1CC[C@]2([C@H]1[C@H]1CC[C@H]3[C@@]([C@]1(C)CC2)(C)CC[C@@H]1[C@]3(C)CC[C@@H](C1(C)C)O)C	C30H50O	426.72	31	0	0.93	1	1	1	135.14	20.23	4.76	9.87	8.02	6.92	6.82	7.28	-8.64	9.83e-07	2.3e-09	Poorly soluble	-10.22	2.58e-08	6.05e-11	Insoluble	-6.74	7.69e-05	1.8e-07	Poorly soluble	Low	No	No	No	No	No	No	No	-1.9	1	3	0	1	2	0.55	0	1	2	5.49
GSK-409	CC[C@@H](C(C)C)CC[C@H]([C@H]1CCC2[C@]1(C)CCC1C2CC=C2[C@]1(C)CCC(C2)O[C@@H]1O[C@H](CO)[C@H]([C@@H]([C@H]1O)O)O)C	C35H60O6	576.85	41	0	0.94	9	6	4	165.61	99.38	5.17	7.74	5.85	3.96	5.02	5.55	-7.7	1.15e-05	2e-08	Poorly soluble	-9.67	1.23e-07	2.14e-10	Poorly soluble	-4.4	0.0228	3.94e-05	Moderately soluble	Low	No	No	No	No	No	No	No	-4.32	1	4	0	0	1	0.55	0	1	3	8.02
GSK-410	OC[C@H]1O[C@@H](OC([C@@H]2CC[C@](O2)(C)[C@H]2[C@@H](O)C[C@@]3([C@]2(C)CCC24C3C[C@@H](C3[C@]4(C2)CC[C@@H](C3(C)C)O[C@@H]2OC[C@H]([C@@H]([C@H]2O)O)O)O)C)(C)C)[C@@H]([C@H]([C@@H]1O)O)O	C41H68O14	784.97	55	0	1	7	14	9	196.95	228.22	4.09	1.26	0.72	-0.59	0.52	1.2	-5.04	0.00718	9.15e-06	Moderately soluble	-5.65	0.00175	2.23e-06	Moderately soluble	-1.11	60.5	0.0771	Soluble	Low	No	Yes	No	No	No	No	No	-10.19	3	3	1	1	5	0.17	0	1	1	9.78
GSK-411	O[C@H]1[C@H](O)CO[C@H]([C@@H]1O[C@@H]1O[C@@H](C)[C@@H]([C@@H]([C@H]1O)O)O)OC1CC[C@]23C(C1(C)C)[C@@H](O)CC1C3(C2)CC[C@]2([C@@]1(C)C[C@@H]([C@@H]2[C@@]1(C)CC[C@H](O1)C(O)(C)C)O)C	C41H68O13	768.97	54	0	1	6	13	8	195.78	207.99	4.41	1.76	1.75	0.15	1.12	1.84	-5.32	0.00368	4.78e-06	Moderately soluble	-5.75	0.00138	1.8e-06	Moderately soluble	-1.7	15.5	0.0201	Soluble	Low	No	Yes	No	No	No	No	No	-9.74	3	3	1	1	5	0.17	0	1	1	9.73
GSK-412	OCC[N+](C)(C)C	C5H14NO	104.17	7	0	1	2	1	1	29.69	20.23	-2.14	-0.4	-0.32	-3.46	-0.57	-1.38	-0.1	82.4	0.791	Very soluble	0.44	286	2.75	Highly soluble	-1.26	5.74	0.0551	Soluble	Low	No	No	No	No	No	No	No	-7.22	0	2	0	0	1	0.55	0	1	1	1
GSK-413	NC[CH][CH]C(=O)O	C4H7NO2	101.1	7	0	0.75	3	3	2	23.71	63.32	0	-3.17	-0.56	-0.39	-0.56	-0.94	1.73	5410	53.5	Highly soluble	2.41	25900	256	Highly soluble	-0.04	93.3	0.923	Soluble	High	No	No	No	No	No	No	No	-9.17	0	4	0	0	3	0.55	0	0	1	1
GSK-414	OC[C@H]1O[C@@H](O[C@H]2CC3[C@]4(C)C[C@@H]([C@@H]([C@@]4(C)CCC43[C@@]3(C2C(C)(C)[C@H](CC3)O[C@@H]2OC[C@H]([C@@H]([C@H]2OC(=O)C)OC(=O)C)O)C4)[C@@]2(C)CC[C@H](O2)C(O)(C)C)O)[C@@H]([C@H]([C@@H]1O)O)O	C45H72O16	869.04	61	0	0.96	11	16	7	216.42	240.36	5.37	2.41	1.87	-0.03	1.61	2.25	-6.02	0.000829	9.54e-07	Poorly soluble	-7.1	6.91e-05	7.95e-08	Poorly soluble	-2.28	4.59	0.00528	Soluble	Low	No	Yes	No	No	No	No	No	-9.89	3	3	2	1	5	0.17	0	2	2	9.92
GSK-415	OC[C@H]1O[C@@H](OC([C@@H]2CC[C@](O2)(C)[C@H]2[C@@H](O)C[C@@]3([C@]2(C)CCC24C3C[C@@H](C3[C@]4(C2)CC[C@@H](C3(C)C)O[C@@H]2OC[C@H]([C@@H]([C@H]2O[C@@H]2O[C@@H](C)[C@@H]([C@H]([C@H]2O)O)O)O)O)O)C)(C)C)[C@@H]([C@H]([C@@H]1O)O)O	C47H78O18	931.11	65	0	1	9	18	11	228.17	287.14	3.16	0.17	-0.42	-2.12	-0.96	-0.04	-5.13	0.00697	7.48e-06	Moderately soluble	-5.76	0.00163	1.75e-06	Moderately soluble	0.18	1410	1.51	Soluble	Low	No	Yes	No	No	No	No	No	-11.86	3	4	1	1	5	0.17	0	1	2	10
GSK-416	[O-]C(=O)C[N+](C)(C)C	C5H11NO2	117.15	8	0	0.8	2	2	0	28.35	40.13	-2.19	-0.13	-1.56	-3.67	-0.91	-1.69	-0.35	52	0.444	Very soluble	-0.26	64.5	0.551	Very soluble	-0.82	17.6	0.15	Soluble	Low	No	No	No	No	No	No	No	-7.11	0	4	0	0	1	0.55	0	1	1	1
GSK-417	CCCCCC(C=CC=CCCCCCCCC(=O)O)O	C18H32O3	296.44	21	0	0.72	14	3	2	90.63	57.53	3.86	5.35	4.86	3.59	5.04	4.54	-4.12	0.0223	7.51e-05	Moderately soluble	-6.31	0.000145	4.89e-07	Poorly soluble	-3.74	0.0542	0.000183	Soluble	High	Yes	No	Yes	No	Yes	Yes	No	-4.31	0	0	1	0	1	0.85	0	1	2	4.01
GSK-418	OC[C@H]1O[C@@H](Oc2cc([C@@H]3COc4c(C3)ccc(c4)O)c(c(c2OC)OC)O[C@@H]2O[C@H](CO)[C@H]([C@@H]([C@H]2O)O)O)[C@@H]([C@H]([C@@H]1O)O)O	C29H38O16	642.6	45	12	0.59	9	16	9	148.38	246.68	1.88	-1.06	-2.51	-3.23	-1.76	-1.34	-2.76	1.12	0.00174	Soluble	-3.63	0.15	0.000234	Soluble	-0.22	389	0.605	Soluble	Low	No	Yes	No	No	No	No	No	-10.97	3	4	1	1	4	0.17	0	0	2	6.71
GSK-419	O[C@H]1[C@H](O)CO[C@H]([C@@H]1O)O[C@H]1CC2[C@]3(C)C[C@@H]([C@@H]([C@@]3(C)CCC32[C@@]2(C1C(C)(C)C(CC2)O[C@@H]1OC[C@H]([C@@H]([C@H]1O[C@@H]1O[C@@H](C)[C@@H]([C@H]([C@H]1O)O)O)O)O)C3)[C@]1(C)CC[C@H](O1)C(O)(C)C)O	C46H76O17	901.09	63	0	1	8	17	10	222.2	266.91	3.03	0.23	0.22	-1.56	-0.5	0.28	-5.04	0.00815	9.04e-06	Moderately soluble	-5.39	0.00363	4.03e-06	Moderately soluble	-0.27	479	0.532	Soluble	Low	No	Yes	No	No	No	No	No	-11.63	3	3	1	1	5	0.17	0	1	2	10
GSK-420	OC[C@H]1O[C@@H](O[C@H]2CC3C4([C@@]5(C2C(C)(C)[C@H](CC5)O[C@@H]2OC[C@H]([C@@H]([C@H]2O)O)O)C4)CC[C@]2([C@@]3(C)C[C@@H]([C@@H]2[C@]2(C)CC[C@@H](O2)C(O)(C)C)O)C)[C@@H]([C@H]([C@@H]1O)O)O	C41H68O14	784.97	55	0	1	7	14	9	196.95	228.22	3.65	1.26	0.72	-0.59	0.52	1.11	-5.04	0.00718	9.15e-06	Moderately soluble	-5.65	0.00175	2.23e-06	Moderately soluble	-1.11	60.5	0.0771	Soluble	Low	No	Yes	No	No	No	No	No	-10.19	3	3	1	1	5	0.17	0	1	1	9.73
GSK-421	OC[C@H]1O[C@@H](O[C@H]2CC3C4([C@@]5(C2C(C)(C)[C@H](CC5)O[C@@H]2OC[C@H]([C@@H]([C@H]2OC(=O)C)O)O)C4)CC[C@]2([C@@]3(C)C[C@@H]([C@@H]2[C@@]2(C)CC[C@H](O2)C(O)(C)C)O)C)[C@@H]([C@H]([C@@H]1O)O)O	C43H70O15	827.01	58	0	0.98	9	15	8	206.68	234.29	4.41	1.83	1.29	-0.33	1.07	1.66	-5.53	0.00246	2.98e-06	Moderately soluble	-6.37	0.000353	4.26e-07	Poorly soluble	-1.7	16.7	0.0201	Soluble	Low	No	Yes	No	No	No	No	No	-10.05	3	3	1	1	5	0.17	0	1	2	9.73
GSK-422	OC[C@H]1O[C@@H](O[C@H]2CC3C4([C@@]5(C2C(C)(C)[C@H](CC5)O[C@@H]2OC[C@H]([C@@H]([C@H]2O)O)O)C4)CC[C@]2([C@@]3(C)C[C@@H]([C@@H]2[C@@]2(C)CC[C@H](O2)C(O)(C)C)O)C)[C@@H]([C@H]([C@@H]1O)O)O	C41H68O14	784.97	55	0	1	7	14	9	196.95	228.22	4.49	1.26	0.72	-0.59	0.52	1.28	-5.04	0.00718	9.15e-06	Moderately soluble	-5.65	0.00175	2.23e-06	Moderately soluble	-1.11	60.5	0.0771	Soluble	Low	No	Yes	No	No	No	No	No	-10.19	3	3	1	1	5	0.17	0	1	1	9.73
GSK-423	OC[C@H]1O[C@@H](O[C@H]2[C@@H](OC[C@H]([C@@H]2O)O)O[C@H]2CC[C@]34C(C2(C)C)[C@@H](O)CC2C4(C3)CC[C@]3([C@@]2(C)C[C@@H]([C@@H]3[C@@]2(C)CC[C@H](O2)C(O[C@@H]2O[C@H](CO)[C@H]([C@@H]([C@H]2O)O)O)(C)C)O)C)[C@@H]([C@H]([C@@H]1O)O)O	C47H78O19	947.11	66	0	1	10	19	12	229.33	307.37	3.25	-0.33	-1.45	-2.84	-1.56	-0.59	-4.84	0.0136	1.43e-05	Moderately soluble	-5.66	0.00206	2.17e-06	Moderately soluble	0.76	5500	5.81	Soluble	Low	No	Yes	No	No	No	No	No	-12.31	3	4	1	1	5	0.17	0	1	2	10
GSK-424	OC[C@H]1O[C@@H](O[C@H]2C[C@H]3[C@]4(C)C[C@@H]([C@@H]([C@@]4(C)CCC43[C@@]3(C2C(C)(C)[C@H](CC3)O[C@@H]2OC[C@H]([C@@H]([C@H]2O)O)O)C4)[C@@]2(C)CC[C@H](O2)C(O[C@@H]2O[C@H](CO)[C@H]([C@@H]([C@H]2O)O)O)(C)C)O)[C@@H]([C@H]([C@@H]1O)O)O	C47H78O19	947.11	66	0	1	10	19	12	229.33	307.37	4.23	-0.33	-1.45	-2.84	-1.56	-0.39	-4.84	0.0136	1.43e-05	Moderately soluble	-5.66	0.00206	2.17e-06	Moderately soluble	0.76	5500	5.81	Soluble	Low	No	Yes	No	No	No	No	No	-12.31	3	4	1	1	5	0.17	0	1	2	10
GSK-425	OC[C@H]1O[C@@H](OC([C@@H]2CC[C@](O2)(C)[C@H]2[C@@H](O)C[C@@]3([C@]2(C)CCC24C3C[C@@H](C3[C@]4(C2)CC[C@@H](C3(C)C)O[C@@H]2OC[C@H]([C@@H]([C@H]2O[C@@H]2O[C@@H](C)[C@@H]([C@H]([C@H]2O)O)O)OC(=O)C)O)O)C)(C)C)[C@@H]([C@H]([C@@H]1O)O)O	C49H80O19	973.15	68	0	0.98	11	19	10	237.91	293.21	4.24	0.74	0.15	-1.86	-0.41	0.57	-5.61	0.00237	2.43e-06	Moderately soluble	-6.48	0.000325	3.34e-07	Poorly soluble	-0.4	389	0.4	Soluble	Low	No	Yes	No	No	No	No	No	-11.71	3	3	2	1	5	0.17	0	1	2	10
GSK-426	O[C@H]1[C@H](O)CO[C@H]([C@@H]1O)OC1CC[C@]23C(C1(C)C)[C@@H](O)CC1C3(C2)CC[C@]2([C@@]1(C)C[C@@H]([C@@H]2[C@]1(C)CC[C@@H](O1)C(O)(C)C)O)C	C35H58O9	622.83	44	0	1	4	9	6	164.56	149.07	4.41	2.85	2.9	1.74	2.6	2.9	-5.23	0.00364	5.85e-06	Moderately soluble	-5.64	0.00143	2.3e-06	Moderately soluble	-2.96	0.686	0.0011	Soluble	Low	No	Yes	No	No	No	No	No	-8.08	2	3	1	1	2	0.17	0	1	1	8.65
GSK-427	Oc1cc(O)c2=CC(=C([O]=c2c1)c1ccc(c(c1)O)O)O	C15H11O6	287.24	21	12	0	1	6	5	76.48	118.22	-2.41	0.77	0.84	-0.26	0.24	-0.16	-2.46	0.989	0.00344	Soluble	-2.83	0.422	0.00147	Soluble	-2.66	0.634	0.00221	Soluble	High	No	Yes	No	No	No	No	No	-7.51	0	0	0	0	0	0.55	1	1	0	3.79
GSK-428	C=C1[C@H]2CC[C@@H](C1(C)C)C2	C10H16	136.23	10	0	0.8	0	0	0	45.22	0	2.57	4.22	3	4.29	3.08	3.43	-3.34	0.0618	0.000454	Soluble	-3.93	0.016	0.000117	Soluble	-2.48	0.455	0.00334	Soluble	Low	Yes	No	No	No	Yes	No	No	-4.13	1	1	0	0	2	0.55	0	1	2	3.5
GSK-429	CC1=CCCC(=C)[C@@H]2[C@@H](CC1)C(C2)(C)C	C15H24	204.35	15	0	0.73	0	0	0	68.78	0	3.29	4.38	4.73	4.63	4.19	4.24	-3.87	0.0278	0.000136	Soluble	-4.1	0.0164	8.01e-05	Moderately soluble	-3.77	0.0349	0.000171	Soluble	Low	No	No	No	Yes	Yes	No	No	-4.44	1	0	0	0	1	0.55	0	1	2	4.51
GSK-430	N[C@H](C(=O)O)Cc1ccccc1	C9H11NO2	165.19	12	6	0.22	3	3	2	45.5	63.32	1.08	-1.52	0.64	-1.11	0.86	-0.01	-0.08	138	0.835	Very soluble	0.7	821	4.97	Highly soluble	-1.86	2.3	0.0139	Soluble	High	No	No	No	No	No	No	No	-8.39	0	0	0	0	1	0.55	0	0	1	1.46
GSK-431	C[C@@H](C(=O)O)N	C3H7NO2	89.09	6	0	0.67	1	3	2	21.01	63.32	0.34	-2.96	-0.58	-3.06	-1.04	-1.46	1.54	3080	34.5	Highly soluble	2.19	13800	155	Highly soluble	0.77	523	5.87	Soluble	High	No	No	No	No	No	No	No	-8.95	0	4	0	0	3	0.55	0	0	1	1
GSK-432	NCC(=O)O	C2H5NO2	75.07	5	0	0.5	1	3	2	16.21	63.32	0.37	-3.21	-0.97	-3.58	-1.04	-1.69	1.78	4550	60.7	Highly soluble	2.45	21200	282	Highly soluble	0.83	510	6.79	Soluble	High	No	No	No	No	No	No	No	-9.04	0	4	0	0	3	0.55	0	0	1	1
GSK-433	OC(=O)CC[C@@H](C(=O)O)N	C5H9NO4	147.13	10	0	0.6	4	5	3	32.4	100.62	0.4	-3.69	-0.74	-3.18	-1.19	-1.68	1.84	10100	68.6	Highly soluble	2.16	21500	146	Highly soluble	0.89	1150	7.83	Soluble	High	No	No	No	No	No	No	No	-9.82	0	4	0	0	2	0.56	0	0	1	1.81
GSK-434	NCCCC[C@@H](C(=O)O)N	C6H14N2O2	146.19	10	0	0.83	5	4	3	38.14	89.34	0.97	-3.05	-0.47	-2.67	-0.72	-1.19	1.51	4680	32	Highly soluble	1.74	7990	54.7	Highly soluble	-0.18	96.1	0.658	Soluble	High	No	No	No	No	No	No	No	-9.36	0	3	0	0	2	0.55	0	0	1	1.75
GSK-435	OC(=O)[C@H](Cc1ccc(cc1)O)N	C9H11NO3	181.19	13	6	0.22	3	4	3	47.52	83.55	0.84	-2.26	0.35	-1.7	0.39	-0.48	0.32	376	2.07	Highly soluble	1.04	1980	11	Highly soluble	-1.29	9.29	0.0513	Soluble	High	No	No	No	No	No	No	No	-9.01	0	0	0	0	2	0.55	0	0	1	1.54
GSK-436	OC(=O)C[C@@H](C(=O)O)N	C4H7NO4	133.1	9	0	0.5	3	5	3	27.59	100.62	-0.09	-3.89	-1.13	-3.59	-1.49	-2.04	1.98	12800	96.3	Highly soluble	2.37	31400	236	Highly soluble	1.31	2730	20.5	Soluble	High	No	No	No	No	No	No	No	-9.87	0	4	0	0	3	0.56	0	0	1	1.8
GSK-437	N[C@H](C(=O)O)C(C)C	C5H11NO2	117.15	8	0	0.8	2	3	2	30.63	63.32	1.03	-2.26	0.05	-2.2	-0.54	-0.78	0.99	1140	9.76	Highly soluble	1.46	3410	29.1	Highly soluble	0.29	227	1.94	Soluble	High	No	No	No	No	No	No	No	-8.62	0	3	0	0	2	0.55	0	0	1	1.19
GSK-438	CC[C@@H]([C@@H](C(=O)O)N)C	C6H13NO2	131.17	9	0	0.83	3	3	2	35.44	63.32	1.29	-1.72	0.44	-1.82	-0.15	-0.39	0.63	557	4.25	Highly soluble	0.9	1050	8.02	Highly soluble	-0.14	96.1	0.733	Soluble	High	No	No	No	No	No	No	No	-8.32	0	2	0	0	1	0.55	0	0	1	1.65
GSK-439	N[C@H](C(=O)O)Cc1c[nH]cn1	C6H9N3O2	155.15	11	5	0.33	3	4	3	37.65	92	-0.13	-3.56	-0.64	-3.74	-0.06	-1.63	1.3	3110	20.1	Highly soluble	2.21	25200	163	Highly soluble	-0.69	31.8	0.205	Soluble	High	No	No	No	No	No	No	No	-9.77	0	3	0	0	2	0.55	0	0	1	2.29
GSK-440	Cc1ccc(cc1)C(C)C	C10H14	134.22	10	6	0.4	1	0	0	45.99	0	2.51	4.1	3.12	4.47	3.29	3.5	-3.63	0.0312	0.000233	Soluble	-3.81	0.021	0.000156	Soluble	-3.57	0.0358	0.000267	Soluble	Low	Yes	No	No	No	No	Yes	No	-4.21	1	1	0	0	2	0.55	0	0	2	1
GSK-441	C/C(=C\COC(=O)C)/CCC=C(C)C	C12H20O2	196.29	14	0	0.58	6	2	0	60.13	26.3	2.83	4.04	3.24	2.95	2.98	3.21	-3.21	0.122	0.000622	Soluble	-4.3	0.00993	5.06e-05	Moderately soluble	-2.52	0.597	0.00304	Soluble	High	Yes	No	No	No	No	No	No	-4.63	0	0	0	0	1	0.55	0	1	2	2.72
GSK-442	CC1=CC[C@@]2(CC1)C(=C)CCCC2(C)C	C15H24	204.35	15	0	0.73	0	0	0	68.52	0	3.2	4.67	4.87	4.63	4.59	4.39	-4.05	0.0183	8.93e-05	Moderately soluble	-4.4	0.00819	4.01e-05	Moderately soluble	-4.22	0.0124	6.07e-05	Moderately soluble	Low	No	No	No	No	Yes	No	No	-4.23	1	0	0	0	1	0.55	0	1	2	4.35
GSK-443	CC1=CCC(=CC1)C(C)C	C10H16	136.23	10	0	0.6	1	0	0	47.12	0	2.73	4.5	3.31	3.27	2.95	3.35	-3.45	0.0479	0.000352	Soluble	-4.22	0.00819	6.01e-05	Moderately soluble	-2.23	0.806	0.00592	Soluble	Low	Yes	No	No	No	No	No	No	-3.94	0	1	0	0	2	0.55	0	1	2	3.11
GSK-444	OC(=O)/C=C/c1ccc(c(c1)O)O	C9H8O4	180.16	13	6	0	2	4	3	47.16	77.76	0.97	1.15	1.09	0.7	0.75	0.93	-1.89	2.32	0.0129	Very soluble	-2.38	0.755	0.00419	Soluble	-0.71	35.1	0.195	Soluble	High	No	No	No	No	No	No	No	-6.58	0	0	0	0	1	0.56	1	2	1	1.81
GSK-445	CC([C@H]1CCC(=C)C=C1)C	C10H16	136.23	10	0	0.6	1	0	0	47.12	0	2.65	3.44	3.16	3.27	2.84	3.07	-2.79	0.223	0.00164	Soluble	-3.12	0.103	0.000757	Soluble	-2.03	1.28	0.00942	Soluble	Low	Yes	No	No	No	No	No	No	-4.69	0	1	0	0	2	0.55	0	0	1	3.73
GSK-446	COc1cc(O)c2c(c1)C(=O)c1c(C2=O)c(O)cc(c1)C	C16H12O5	284.26	21	12	0.12	1	5	2	75.25	83.83	2.49	3.04	2.19	0.61	3.07	2.28	-3.87	0.038	0.000134	Soluble	-4.47	0.00972	3.42e-05	Moderately soluble	-4.6	0.00707	2.49e-05	Moderately soluble	High	No	No	Yes	No	Yes	No	Yes	-5.88	0	0	0	0	0	0.55	1	0	0	2.69
GSK-447	CC1=CC[C@@H]2C[C@H]1C2(C)C	C10H16	136.23	10	0	0.8	0	0	0	45.22	0	2.63	4.48	3	4.29	2.79	3.44	-3.51	0.0424	0.000311	Soluble	-4.2	0.00859	6.31e-05	Moderately soluble	-2.23	0.806	0.00592	Soluble	Low	Yes	No	No	No	Yes	No	No	-3.95	1	1	0	0	2	0.55	0	1	2	4.44
GSK-448	C[C@@H]1CC[C@]2([C@@H]([C@H]1C)C1=CC[C@H]3[C@@]([C@@]1(CC2)C)(C)CC[C@@H]1[C@]3(C)CC[C@@H](C1(C)C)O)C(=O)O	C30H48O3	456.7	33	0	0.9	1	3	2	136.91	57.53	3.95	7.34	7.09	5.82	5.46	5.93	-7.23	2.69e-05	5.89e-08	Poorly soluble	-8.38	1.92e-06	4.21e-09	Poorly soluble	-5.67	0.000972	2.13e-06	Moderately soluble	Low	No	No	No	No	No	No	No	-3.87	1	3	0	1	1	0.85	0	1	2	6.21
GSK-449	CC1=CCCC(=CCC(=C(C)C)CC1)C	C15H24	204.35	15	0	0.6	0	0	0	70.68	0	3.27	5.77	5.18	4.53	4.25	4.6	-4.74	0.0037	1.81e-05	Moderately soluble	-5.54	0.000591	2.89e-06	Moderately soluble	-3.75	0.0363	0.000178	Soluble	Low	No	No	No	No	Yes	No	No	-3.45	1	0	0	0	2	0.55	0	1	2	3.65
GSK-450	CCCCCCCC/C=C\CCCCCCCC(=O)O	C18H34O2	282.46	20	0	0.83	15	2	1	89.94	37.3	4.27	7.64	6.11	4.57	5.95	5.71	-5.41	0.00109	3.85e-06	Moderately soluble	-8.26	1.54e-06	5.46e-09	Poorly soluble	-5.39	0.00114	4.04e-06	Moderately soluble	High	No	No	Yes	No	Yes	No	No	-2.6	1	1	1	1	1	0.85	0	1	2	3.07
GSK-451	CCCCCCCCCCCCCCCCCC(=O)O	C18H36O2	284.48	20	0	0.94	16	2	1	90.41	37.3	4.3	8.23	6.33	4.67	6.13	5.93	-5.73	0.000526	1.85e-06	Moderately soluble	-8.87	3.8e-07	1.33e-09	Poorly soluble	-6.11	0.000219	7.71e-07	Poorly soluble	High	No	No	Yes	No	No	No	No	-2.19	1	1	1	1	2	0.85	0	0	2	2.54
GSK-452	CCCCCCCCCCCCCCCC	C16H34	226.44	16	0	1	13	0	0	79.03	0	4.67	8.28	6.49	6.44	6.21	6.42	-5.6	0.000566	2.5e-06	Moderately soluble	-8.14	1.63e-06	7.19e-09	Poorly soluble	-6.33	0.000106	4.69e-07	Poorly soluble	Low	No	No	Yes	No	No	No	No	-1.8	1	1	1	1	2	0.55	0	0	3	2.26
GSK-453	CCCCCCCCCCCCCCCCCCCCC	C21H44	296.57	21	0	1	18	0	0	103.06	0	5.85	10.99	8.44	7.6	8.43	8.26	-7.41	1.14e-05	3.85e-08	Poorly soluble	-10.96	3.29e-09	1.11e-11	Insoluble	-8.34	1.37e-06	4.61e-09	Poorly soluble	Low	No	No	Yes	No	No	No	No	-0.31	1	1	1	1	3	0.55	0	0	2	2.84
GSK-454	CC1=CC[C@@](CC1)(O)C(C)C	C10H18O	154.25	11	0	0.8	1	1	1	48.8	20.23	2.51	3.26	2.5	2.3	2.44	2.6	-2.78	0.254	0.00164	Soluble	-3.36	0.0675	0.000438	Soluble	-1.91	1.92	0.0124	Soluble	High	Yes	No	No	No	No	No	No	-4.93	0	1	0	0	2	0.55	0	1	1	3.28
GSK-455	C=C/C(=C/C/C=C(/CCC=C(C)C)\C)/C	C15H24	204.35	15	0	0.47	6	0	0	72.32	0	3.89	6.12	5.2	4.84	4.76	4.96	-4.57	0.00554	2.71e-05	Moderately soluble	-5.9	0.000256	1.25e-06	Moderately soluble	-3.37	0.0882	0.000432	Soluble	Low	No	No	Yes	No	Yes	No	No	-3.2	1	0	0	0	2	0.55	0	2	2	3.72
GSK-456	CC1=C[C@@H]2[C@@H](CC1)[C@](C)(O)CC[C@H]2C(C)C	C15H26O	222.37	16	0	0.87	1	1	1	70.72	20.23	3.15	3.34	3.78	3.67	3.22	3.43	-3.26	0.123	0.000554	Soluble	-3.44	0.0804	0.000361	Soluble	-2.73	0.41	0.00185	Soluble	High	Yes	No	No	Yes	No	No	No	-5.29	0	0	0	0	1	0.55	0	1	1	4.29
GSK-457	CC1=CC[C@]2([C@@H]1C2)C(C)C	C10H16	136.23	10	0	0.8	1	0	0	45.22	0	2.67	2.85	3	4.29	2.95	3.15	-2.41	0.525	0.00385	Soluble	-2.51	0.422	0.0031	Soluble	-2.23	0.806	0.00592	Soluble	Low	Yes	No	No	No	No	No	No	-5.11	1	1	0	0	2	0.55	0	1	1	3.99
GSK-458	C=C[C@](OC(=O)C)(CCC=C(C)C)C	C12H20O2	196.29	14	0	0.58	6	2	0	60.17	26.3	3.11	3.93	3.24	2.95	2.98	3.24	-3.14	0.143	0.00073	Soluble	-4.18	0.0129	6.58e-05	Moderately soluble	-2.52	0.597	0.00304	Soluble	High	Yes	No	No	No	No	No	No	-4.71	0	0	0	0	1	0.55	0	1	2	2.75
GSK-459	CCCCCCCC/C=C\CCCCCCCCO	C18H36O	268.48	19	0	0.89	15	1	1	89.33	20.23	4.73	7.45	6.02	4.79	6.36	5.87	-5.21	0.00166	6.19e-06	Moderately soluble	-7.71	5.27e-06	1.96e-08	Poorly soluble	-5.86	0.000375	1.4e-06	Moderately soluble	High	No	No	Yes	No	No	No	No	-2.65	1	1	1	1	2	0.55	0	1	2	3.26
GSK-460	C=C[C@@]1(C)CC[C@@H](C[C@@H]1C(=C)C)C(=C)C	C15H24	204.35	15	0	0.6	3	0	0	70.42	0	3.4	6.11	4.75	4.53	4.5	4.66	-4.76	0.00357	1.74e-05	Moderately soluble	-5.89	0.000262	1.28e-06	Moderately soluble	-3.58	0.0536	0.000262	Soluble	Low	No	No	No	Yes	Yes	No	No	-3.21	1	0	0	0	2	0.55	0	1	2	3.63
GSK-461	CCCCCCCCCCCCCCCCCC	C18H38	254.49	18	0	1	15	0	0	88.64	0	5.23	9.37	7.27	6.92	7.1	7.18	-6.33	0.000119	4.67e-07	Poorly soluble	-9.27	1.35e-07	5.32e-10	Poorly soluble	-7.13	1.86e-05	7.33e-08	Poorly soluble	Low	No	No	Yes	No	No	No	No	-1.2	1	1	1	1	2	0.55	0	0	2	2.49
GSK-462	O=Cc1ccc(c(c1)O)O	C7H6O3	138.12	10	6	0	1	3	2	35.88	57.53	0.79	1.09	0.91	0.18	1.02	0.8	-1.76	2.39	0.0173	Very soluble	-1.89	1.78	0.0129	Very soluble	-1.17	9.4	0.0681	Soluble	High	Yes	No	No	No	No	No	Yes	-6.37	0	3	0	0	1	0.55	1	2	1	1
GSK-463	C[C@@H]1COC2=C1C(=O)C(=O)c1c2ccc2c1CCC=C2C	C18H16O3	280.32	21	6	0.33	0	3	0	80.76	43.37	2.76	2.55	3.18	2.05	4.27	2.96	-3.4	0.113	0.000402	Soluble	-3.11	0.219	0.00078	Soluble	-4.95	0.00317	1.13e-05	Moderately soluble	High	Yes	No	Yes	Yes	Yes	No	Yes	-6.2	0	0	0	0	0	0.85	2	1	0	3.94
GSK-464	CC[C@H](C(C)C)/C=C/[C@H]([C@H]1CC[C@@H]2[C@]1(C)CC[C@H]1[C@H]2CC=C2[C@]1(C)CC[C@@H](C2)O)C	C29H48O	412.69	30	0	0.86	5	1	1	132.75	20.23	5.03	8.56	7.8	6.62	6.86	6.98	-7.46	1.43e-05	3.46e-08	Poorly soluble	-8.86	5.71e-07	1.38e-09	Poorly soluble	-5.47	0.0014	3.39e-06	Moderately soluble	Low	No	No	No	No	Yes	No	No	-2.74	1	3	0	1	2	0.55	0	1	2	6.21
GSK-465	CC(=CCOc1c2ccoc2cc2c1ccc(=O)o2)C	C16H14O4	270.28	20	13	0.19	3	4	0	77.5	52.58	3.07	3.43	3.88	2.14	3.99	3.3	-3.96	0.0297	0.00011	Soluble	-4.21	0.0165	6.1e-05	Moderately soluble	-5.51	0.000833	3.08e-06	Moderately soluble	High	Yes	No	Yes	Yes	Yes	No	No	-5.51	0	0	0	0	0	0.55	0	2	0	3.24
GSK-466	CC(=O)O[C@H]1CC[C@]2([C@H](C1(C)C)CC[C@@]1([C@@H]2CC=C2[C@@]1(C)CC[C@@]1([C@H]2CC(C)(C)CC1)C(=O)O)C)C	C32H50O4	498.74	36	0	0.88	3	4	1	146.39	63.6	3.71	8.06	7.8	6.06	6.36	6.4	-7.81	7.69e-06	1.54e-08	Poorly soluble	-9.25	2.8e-07	5.61e-10	Poorly soluble	-6.73	9.33e-05	1.87e-07	Poorly soluble	Low	No	No	No	No	Yes	No	No	-3.62	1	4	0	1	1	0.85	0	1	2	6.14
GSK-467	CC1=CCC(C)(C)C=CCC(=CCC1)C	C15H24	204.35	15	0	0.6	0	0	0	70.42	0	3.27	4.55	5.04	4.53	3.91	4.26	-3.97	0.0217	0.000106	Soluble	-4.27	0.0109	5.34e-05	Moderately soluble	-3.52	0.0619	0.000303	Soluble	Low	No	No	No	No	Yes	No	No	-4.32	1	0	0	0	1	0.55	0	1	2	3.66
GSK-468	C=C1CC[C@@H]2[C@H]([C@H]3[C@H]1CC[C@]3(C)O)C2(C)C	C15H24O	220.35	16	0	0.87	0	1	1	68.34	20.23	3.04	3.11	3.39	3.67	3.27	3.3	-3.17	0.151	0.000683	Soluble	-3.2	0.138	0.000626	Soluble	-2.96	0.239	0.00109	Soluble	High	Yes	No	No	Yes	No	No	No	-5.44	0	0	0	0	1	0.55	0	1	1	3.78
GSK-469	O=C1C[C@H]2C(C)(C)CCC[C@]2(c2c1cc(C(C)C)c(c2)O)C	C20H28O2	300.44	22	6	0.65	1	2	1	92.06	37.3	3.34	5.62	5.19	3.9	5.19	4.65	-5.38	0.00125	4.18e-06	Moderately soluble	-6.17	0.000205	6.82e-07	Poorly soluble	-5.65	0.000674	2.24e-06	Moderately soluble	High	Yes	No	No	Yes	Yes	No	No	-4.14	0	0	0	0	1	0.55	0	0	1	3.45
GSK-470	CCCCCCCCCCCCCCCCCCCCCCCCCCC	C27H56	380.73	27	0	1	24	0	0	131.9	0	7.32	14.24	10.78	8.86	11.09	10.46	-9.59	9.84e-08	2.58e-10	Poorly soluble	-14.33	1.79e-12	4.7e-15	Insoluble	-10.71	7.41e-09	1.95e-11	Insoluble	Low	No	Yes	No	No	No	No	No	1.49	1	3	1	1	3	0.55	0	0	3	3.56
GSK-471	CCCCCCCCCCCCCCCCCCCCCCCCC	C25H52	352.68	25	0	1	22	0	0	122.29	0	6.81	13.16	10	8.45	10.2	9.72	-8.87	4.81e-07	1.36e-09	Poorly soluble	-13.21	2.19e-11	6.2e-14	Insoluble	-9.92	4.21e-08	1.19e-10	Poorly soluble	Low	No	Yes	No	No	No	No	No	0.89	1	2	1	1	3	0.55	0	0	3	3.32
GSK-472	O=C1c2c3C=CCC(c3ccc2c2c(C1=O)c(C)co2)(C)C	C19H16O3	292.33	22	11	0.26	0	3	0	85.02	47.28	2.69	4.04	4.22	2.16	4.96	3.61	-4.57	0.00791	2.71e-05	Moderately soluble	-4.74	0.00536	1.83e-05	Moderately soluble	-6.24	0.000168	5.75e-07	Poorly soluble	High	Yes	No	Yes	Yes	Yes	No	Yes	-5.21	0	0	0	0	0	0.55	2	1	1	3.65
GSK-473	C[C@@H](CCC[C@]1(C)CCc2c(O1)c(C)c(c(c2C)O)C)CCC[C@@H](CCCC(C)C)C	C29H50O2	430.71	31	6	0.79	12	2	1	139.27	29.46	6.04	10.7	8.84	6.14	9.75	8.29	-8.6	1.08e-06	2.5e-09	Poorly soluble	-11.27	2.3e-09	5.33e-12	Insoluble	-9.16	2.97e-07	6.89e-10	Poorly soluble	Low	No	Yes	No	No	No	No	No	-1.33	1	3	1	1	1	0.55	0	0	3	5.17
GSK-474	OC(=O)[C@H]1O[C@@H](Oc2cc3oc(cc(=O)c3c(c2O)O)c2ccccc2)[C@@H]([C@H]([C@@H]1O)O)O	C21H18O11	446.36	32	16	0.24	4	11	6	106.72	187.12	1.75	1.11	0.14	-1.63	-0.1	0.25	-3.41	0.173	0.000387	Soluble	-4.63	0.0104	2.33e-05	Moderately soluble	-2.22	2.67	0.00598	Soluble	Low	No	Yes	No	No	No	No	No	-8.23	2	0	1	1	3	0.11	1	1	1	5.09
GSK-475	CC1=C[C@H]2C(=C(C)CC[C@@H]2C(C)C)CC1	C15H24	204.35	15	0	0.73	1	0	0	69.04	0	3.41	3.8	4.73	4.63	4.12	4.14	-3.43	0.0751	0.000367	Soluble	-3.49	0.0655	0.00032	Soluble	-3.52	0.0619	0.000303	Soluble	Low	No	No	No	Yes	Yes	No	No	-4.85	1	0	0	0	1	0.55	0	1	2	4.14
GSK-476	O[C@@H]1C[C@H]2C([C@]1(C)CC2)(C)C	C10H18O	154.25	11	0	1	0	1	1	46.6	20.23	2.46	2.72	2.19	2.45	2.27	2.42	-2.51	0.477	0.00309	Soluble	-2.8	0.245	0.00159	Soluble	-1.91	1.92	0.0124	Soluble	High	Yes	No	No	No	No	No	No	-5.31	0	1	0	0	2	0.55	0	0	1	3.43
GSK-477	CC1=CCCC(=C)C=C[C@@H](CC1)C(C)C	C15H24	204.35	15	0	0.6	1	0	0	70.68	0	3.32	4.74	4.89	4.53	4.01	4.3	-4.03	0.0192	9.39e-05	Moderately soluble	-4.47	0.00693	3.39e-05	Moderately soluble	-3.32	0.0983	0.000481	Soluble	Low	No	No	No	No	Yes	No	No	-4.18	1	0	0	0	1	0.55	0	1	2	4.55
GSK-478	OC[C@@H](C(=O)O)N	C3H7NO3	105.09	7	0	0.67	2	4	3	22.18	83.55	0.18	-3.07	-1.61	-3.91	-1.45	-1.97	1.57	3950	37.5	Highly soluble	1.88	7970	75.9	Highly soluble	1.3	2080	19.8	Soluble	High	No	No	No	No	No	No	No	-9.12	0	4	0	0	3	0.55	0	0	1	1.51
GSK-479	C[C@H]([C@@H](C(=O)O)N)O	C4H9NO3	119.12	8	0	0.75	2	4	3	26.98	83.55	0.33	-2.94	-1.22	-3.46	-1.36	-1.73	1.41	3030	25.4	Highly soluble	1.75	6620	55.6	Highly soluble	1.25	2100	17.6	Soluble	High	No	No	No	No	No	No	No	-9.11	0	4	0	0	3	0.55	0	0	1	1.79
GSK-480	O[C@@H]1C[C@@]2(C)[C@H](C([C@@H]1O)(C)C)CC[C@@]1([C@@H]2CC=C2[C@@]1(C)CC[C@@]1([C@H]2[C@](C)(O)[C@H](C)CC1)C(=O)O)C	C30H48O5	488.7	35	0	0.9	1	5	4	139.28	97.99	3.1	4.96	5.18	4.14	4.07	4.29	-5.93	0.000576	1.18e-06	Moderately soluble	-6.76	8.57e-05	1.75e-07	Poorly soluble	-4.48	0.0163	3.33e-05	Moderately soluble	High	No	Yes	No	No	No	No	No	-5.76	0	3	0	0	0	0.56	0	1	2	6.59
GSK-481	N[C@H](C(=O)O)CSSC[C@H](C(=O)O)N	C6H12N2O4S2	240.3	14	0	0.67	7	6	4	55.1	177.24	0.43	-5.08	-0.81	-5.83	-1.33	-2.52	2.33	51700	215	Highly soluble	2	23900	99.6	Highly soluble	0.95	2170	9.02	Soluble	Low	No	No	No	No	No	No	No	-11.37	0	1	1	1	2	0.55	0	1	1	3.39
GSK-482	C[C@@H]1CC[C@@]2(OC1)O[C@@H]1[C@H]([C@@H]2C)[C@@]2([C@H](C1)[C@@H]1CC[C@@H]3[C@]([C@H]1CC2)(C)CC[C@@H](C3)O)C	C27H44O3	416.64	30	0	1	0	3	1	122.07	38.69	4.5	6.49	5.79	5.08	4.3	5.23	-6.51	0.000128	3.08e-07	Poorly soluble	-7.1	3.32e-05	7.97e-08	Poorly soluble	-4.51	0.0129	3.1e-05	Moderately soluble	High	Yes	No	No	No	No	No	No	-4.23	1	2	0	0	1	0.55	0	0	2	6.88
GSK-483	COC(=O)[C@H]1[C@H](Oc2c1c(/C=C/C(=O)O[C@@H](C(=O)O)Cc1ccc(c(c1)O)O)ccc2O)c1ccc(c(c1)O)O	C28H24O12	552.48	40	18	0.18	10	12	6	138.15	200.28	1.77	3.11	2.42	0.64	2.41	2.07	-4.9	0.00699	1.27e-05	Moderately soluble	-6.98	5.73e-05	1.04e-07	Poorly soluble	-3.83	0.0819	0.000148	Soluble	Low	No	No	No	No	No	No	No	-7.46	3	2	1	1	3	0.11	1	3	2	5.11
GSK-484	CCCCCCCCCCCCCCCCCCO	C18H38O	270.49	19	0	1	16	1	1	89.8	20.23	4.86	8.2	6.24	4.93	6.54	6.15	-5.63	0.000638	2.36e-06	Moderately soluble	-8.49	8.85e-07	3.27e-09	Poorly soluble	-6.57	7.21e-05	2.67e-07	Poorly soluble	High	No	No	Yes	No	No	No	No	-2.13	1	1	1	1	3	0.55	0	0	2	2.52
GSK-485	C[C@@H]1CC[C@@H]2[C@@]31CC[C@]([C@H](C3)C2(C)C)(C)O	C15H26O	222.37	16	0	1	0	1	1	68.56	20.23	2.94	3.88	3.61	3.81	3.4	3.53	-3.66	0.0483	0.000217	Soluble	-4	0.0221	9.95e-05	Moderately soluble	-3.18	0.146	0.000655	Soluble	High	Yes	No	No	No	Yes	No	No	-4.9	0	0	0	0	1	0.55	0	0	2	4.39
GSK-486	N[C@H](C(=O)O)CC(C)C	C6H13NO2	131.17	9	0	0.83	3	3	2	35.44	63.32	1.14	-1.52	0.44	-1.82	-0.15	-0.38	0.5	417	3.18	Highly soluble	0.7	652	4.97	Highly soluble	-0.14	96.1	0.733	Soluble	High	No	No	No	No	No	No	No	-8.18	0	2	0	0	1	0.55	0	0	1	1.39
GSK-487	CSCC[C@@H](C(=O)O)N	C5H11NO2S	149.21	9	0	0.8	4	3	2	38.22	88.62	1.12	-1.87	0.15	-2.2	-0.15	-0.59	0.68	709	4.75	Highly soluble	0.53	504	3.38	Highly soluble	-0.23	87.5	0.586	Soluble	High	No	No	No	No	No	No	No	-8.54	0	2	0	0	1	0.55	0	0	1	2.43
GSK-488	C[C@@H]1CC[C@]2([C@@H]([C@H]1C)C1=CC[C@H]3[C@@]([C@@]1(CC2)C)(C)CC[C@@H]1[C@]3(C)C[C@@H](O)[C@@H](C1(C)C)O)C(=O)O	C30H48O4	472.7	34	0	0.9	1	4	3	138.08	77.76	3.6	6.37	6.06	4.97	4.56	5.11	-6.72	9.05e-05	1.91e-07	Poorly soluble	-7.79	7.59e-06	1.61e-08	Poorly soluble	-4.85	0.00668	1.41e-05	Moderately soluble	High	No	Yes	No	No	No	No	No	-4.66	1	3	0	1	1	0.56	0	1	2	6.34
GSK-489	Cc1cc(O)c2c(c1)C(=O)c1c(C2=O)cccc1O	C15H10O4	254.24	19	12	0.07	0	4	2	68.76	74.6	2.26	4.08	2.18	0.92	3.04	2.5	-4.45	0.00894	3.52e-05	Moderately soluble	-5.35	0.00113	4.45e-06	Moderately soluble	-4.49	0.00832	3.27e-05	Moderately soluble	High	Yes	No	Yes	No	Yes	No	Yes	-4.95	0	0	0	0	0	0.55	1	0	1	2.46
GSK-490	C[C@@H]1CC[C@]2([C@@H]([C@H]1C)C1=CC[C@H]3[C@@]([C@@]1(CC2)C)(C)CC[C@@H]1[C@]3(C)CC[C@H](C1(C)C)O)C	C30H50O	426.72	31	0	0.93	0	1	1	135.14	20.23	4.71	9.01	8.02	6.92	6.52	7.04	-8.16	2.94e-06	6.89e-09	Poorly soluble	-9.33	2.02e-07	4.72e-10	Poorly soluble	-6.71	8.23e-05	1.93e-07	Poorly soluble	Low	No	No	No	No	No	No	No	-2.51	1	3	0	1	2	0.55	0	1	2	6.17
GSK-491	COc1c(O)cc(cc1OC)/C=C/C(=O)O	C11H12O5	224.21	16	6	0.18	4	5	2	58.12	75.99	1.85	1.46	1.4	0.73	1.33	1.36	-2.16	1.54	0.00686	Soluble	-2.66	0.488	0.00218	Soluble	-1.55	6.33	0.0282	Soluble	High	No	No	No	No	No	No	No	-6.63	0	0	0	0	0	0.56	0	1	1	2.17
GSK-492	O=C1CCC(c2c1c1c(cc2)cc(c(c1O)O)C(C)C)(C)C	C19H22O3	298.38	22	10	0.42	1	3	2	89.92	57.53	3.14	4.56	4.63	2.86	4.69	3.97	-4.83	0.00438	1.47e-05	Moderately soluble	-5.49	0.000963	3.23e-06	Moderately soluble	-5.5	0.00095	3.18e-06	Moderately soluble	High	Yes	No	Yes	Yes	No	Yes	No	-4.88	0	0	0	0	0	0.55	2	1	1	2.48
GSK-493	O=C1c2c3CCC=C(c3ccc2c2c(C1=O)c(C)co2)C	C18H14O3	278.3	21	11	0.22	0	3	0	80.33	47.28	2.61	3.08	3.98	1.93	4.87	3.29	-3.89	0.0356	0.000128	Soluble	-3.74	0.0506	0.000182	Soluble	-6.09	0.000227	8.15e-07	Poorly soluble	High	Yes	No	Yes	Yes	Yes	Yes	Yes	-5.81	0	0	0	0	0	0.55	2	1	0	3.55
GSK-494	CC(C1=Cc2ccc3c(c2C(=O)C1=O)C=CCC3(C)C)C	C19H20O2	280.36	21	6	0.37	1	2	0	86.48	34.14	2.83	4.58	3.97	3.16	4.86	3.88	-4.61	0.0069	2.46e-05	Moderately soluble	-5.02	0.00267	9.53e-06	Moderately soluble	-5.26	0.00154	5.51e-06	Moderately soluble	High	Yes	No	No	Yes	Yes	No	Yes	-4.76	0	0	0	0	0	0.55	2	1	1	3.29
GSK-495	CCCCCCCCCCCCCCCCCCCCCOC=O	C22H44O2	340.58	24	0	0.95	21	2	0	109.54	26.3	5.7	10.59	7.59	5.58	8.19	7.53	-7.24	1.97e-05	5.79e-08	Poorly soluble	-11.09	2.75e-09	8.08e-12	Insoluble	-8.02	3.26e-06	9.57e-09	Poorly soluble	Low	No	No	Yes	No	No	No	No	-0.86	1	1	1	1	2	0.55	0	1	2	2.95
GSK-496	C[C@@H]1COC2=C1C(=O)c1c(C2=O)c2C(=O)CCC(c2cc1)(C)C	C19H18O4	310.34	23	6	0.42	0	4	0	84.99	60.44	2.16	2.98	3.24	1.43	4.45	2.85	-3.83	0.0454	0.000146	Soluble	-3.91	0.0379	0.000122	Soluble	-5.45	0.00111	3.57e-06	Moderately soluble	High	Yes	Yes	Yes	Yes	Yes	No	Yes	-6.08	0	0	0	0	0	0.85	1	0	0	3.99
GSK-497	CC(C1=Cc2ccc3c(c2C(=O)C1=O)cccc3C)C	C18H16O2	264.32	20	10	0.22	1	2	0	81.71	34.14	2.56	4.24	3.84	2.81	4.85	3.66	-4.45	0.00929	3.52e-05	Moderately soluble	-4.67	0.00568	2.15e-05	Moderately soluble	-5.92	0.000316	1.19e-06	Moderately soluble	High	Yes	No	Yes	Yes	Yes	Yes	No	-4.9	0	0	0	0	0	0.55	2	1	1	3.07
GSK-498	C[C@@H]1CC[C@]2([C@@H]([C@H]1C)C1=CC[C@H]3[C@@]([C@@]1(CC2)C)(C)CC[C@@H]1[C@]3(C)C[C@@H](O)[C@H](C1(C)C)O)C(=O)O	C30H48O4	472.7	34	0	0.9	1	4	3	138.08	77.76	3.54	6.37	6.06	4.97	4.56	5.1	-6.72	9.05e-05	1.91e-07	Poorly soluble	-7.79	7.59e-06	1.61e-08	Poorly soluble	-4.85	0.00668	1.41e-05	Moderately soluble	High	No	Yes	No	No	No	No	No	-4.66	1	3	0	1	1	0.56	0	1	2	6.34
GSK-499	OCC(=O)c1ccc(c(c1)O)O	C8H8O4	168.15	12	6	0.12	2	4	3	41.84	77.76	0.81	0.66	0.27	-0.34	0.59	0.4	-1.54	4.89	0.0291	Very soluble	-1.87	2.27	0.0135	Very soluble	-1.02	16.1	0.0957	Soluble	High	No	No	No	No	No	No	Yes	-6.86	0	0	0	0	1	0.55	1	1	1	1.23
GSK-500	O=C[C@H](/C=C(/CCC=C(C)C)\C)O	C11H18O2	182.26	13	0	0.55	5	2	1	55.4	37.3	2.18	2.63	2.24	1.86	2.38	2.26	-2.3	0.92	0.00505	Soluble	-3.06	0.157	0.000864	Soluble	-1.45	6.42	0.0352	Soluble	High	Yes	No	No	No	No	No	No	-5.54	0	0	0	0	1	0.55	0	2	1	3.38
GSK-501	O=C1c2c3[C@H](O)CCC(c3ccc2c2c(C1=O)c(C)co2)(C)C	C19H18O4	310.34	23	11	0.37	0	4	1	85.86	67.51	2.37	2.85	3.41	1.39	4.46	2.9	-3.91	0.0379	0.000122	Soluble	-3.93	0.0368	0.000118	Soluble	-5.89	0.000395	1.27e-06	Moderately soluble	High	Yes	Yes	Yes	Yes	No	Yes	Yes	-6.17	0	0	0	0	0	0.55	2	1	0	4.17
GSK-502	O[C@H]1CCc2c(C1(C)C)ccc1c2C(=O)C(=O)c2c1occ2C	C19H18O4	310.34	23	11	0.37	0	4	1	85.86	67.51	2.54	2.99	3.22	1.39	4.46	2.92	-4	0.0309	9.96e-05	Moderately soluble	-4.07	0.0263	8.48e-05	Moderately soluble	-5.89	0.000395	1.27e-06	Moderately soluble	High	Yes	Yes	Yes	Yes	Yes	Yes	Yes	-6.07	0	0	0	0	0	0.55	2	1	0	4.14
GSK-503	CC([C@@]12CC[C@@]([C@H]2C1)(C)O)C	C10H18O	154.25	11	0	1	1	1	1	46.9	20.23	2.35	2.12	2.19	2.45	2.44	2.31	-2.07	1.33	0.00859	Soluble	-2.18	1.03	0.00667	Soluble	-1.91	1.92	0.0124	Soluble	High	Yes	No	No	No	No	No	No	-5.74	0	1	0	0	2	0.55	0	0	1	2.82
GSK-504	OC(=O)/C=C/c1ccc(c2c1cc(o2)c1ccc(c(c1)O)O)O	C17H12O6	312.27	23	15	0	3	6	4	84.39	111.13	1.86	2.87	3.21	0.97	2.44	2.27	-3.87	0.0422	0.000135	Soluble	-4.86	0.00428	1.37e-05	Moderately soluble	-3.53	0.093	0.000298	Soluble	High	No	No	No	No	No	No	No	-6.17	0	0	0	0	0	0.56	1	2	0	3.17
GSK-505	CC(C1=Cc2ccc3c(c2C(=O)C1=O)CCCC3=C)C	C18H18O2	266.33	20	6	0.33	1	2	0	81.79	34.14	2.7	3.86	3.73	2.93	5.05	3.65	-4.08	0.0222	8.34e-05	Moderately soluble	-4.27	0.0142	5.33e-05	Moderately soluble	-5.36	0.00118	4.42e-06	Moderately soluble	High	Yes	No	Yes	Yes	Yes	No	Yes	-5.18	0	0	0	0	0	0.55	2	1	1	3.3
GSK-506	OCCCc1cc(OC)c2c(c1)c(C=O)c(o2)c1ccc(c(c1)OC)O	C20H20O6	356.37	26	15	0.25	7	6	2	97.79	89.13	3.02	2.97	3.56	0.93	4.38	2.97	-3.89	0.0464	0.00013	Soluble	-4.5	0.0111	3.13e-05	Moderately soluble	-6.03	0.000333	9.35e-07	Poorly soluble	High	No	No	Yes	Yes	Yes	Yes	Yes	-6.37	0	0	0	0	0	0.55	0	1	1	3.4
GSK-507	OC[C@H]1O[C@@H](O[C@H]2OC=C([C@H]3[C@@H]2[C@@](C)(OC(=O)C)C[C@@H]3OC(=O)c2cc(OC)c(c(c2)OC)O)C(=O)OC)[C@@H]([C@H]([C@@H]1O)O)O	C28H36O16	628.58	44	6	0.61	12	16	5	142.95	226.2	4.32	-0.22	-0.88	-1.6	-0.87	0.15	-2.91	0.778	0.00124	Soluble	-4.07	0.0531	8.45e-05	Moderately soluble	-0.56	171	0.272	Soluble	Low	No	Yes	No	No	No	No	No	-10.29	2	4	2	1	3	0.11	0	1	2	6.62
GSK-508	COC(=O)C1=CO[C@@H]([C@@H]2[C@H]1[C@@H](OC(=O)c1cc(OC)c(c(c1)OC)O)C[C@]2(C)OC(=O)C)O	C22H26O11	466.44	33	6	0.5	9	11	2	110.57	147.05	3.31	1.37	1.3	0.47	1.14	1.52	-3.14	0.341	0.000732	Soluble	-4.06	0.0405	8.69e-05	Moderately soluble	-2.37	2	0.0043	Soluble	Low	No	Yes	No	No	No	No	No	-8.17	1	0	1	1	1	0.56	0	1	2	5.32
GSK-509	O=C1C[C@H]2C(C)(C)CCC[C@@]2(C2=C1C(=O)C(=C(C2=O)O)C(C)C)C	C20H26O4	330.42	24	0	0.65	1	4	1	92.62	71.44	2.5	4.17	3.71	1.82	4.19	3.28	-4.45	0.0117	3.55e-05	Moderately soluble	-5.38	0.00138	4.18e-06	Moderately soluble	-4.5	0.0104	3.15e-05	Moderately soluble	High	Yes	No	No	Yes	Yes	No	Yes	-5.35	0	0	0	0	0	0.85	1	2	1	4.65
GSK-510	O[C@H]1C[C@H]2C(C)(C)CCC[C@@]2(C2=C1C=C(C(C)C)C(=O)C2=O)C	C20H28O3	316.43	23	0	0.7	1	3	1	92.01	54.37	2.81	3.78	3.61	2.76	4.1	3.41	-4.12	0.0242	7.63e-05	Moderately soluble	-4.62	0.00767	2.42e-05	Moderately soluble	-4.17	0.0213	6.75e-05	Moderately soluble	High	Yes	No	No	Yes	Yes	No	Yes	-5.55	0	0	0	0	0	0.55	2	2	1	5.2
GSK-511	COC(=O)[C@H](Cc1ccc(c(c1)O)O)OC(=O)/C=C/c1ccc(c2c1[C@H](C(=O)O[C@H](C(=O)O)Cc1ccc(c(c1)O)O)[C@@H](O2)c1ccc(c(c1)O)O)O	C37H32O16	732.64	53	24	0.19	15	16	8	182.39	267.04	2.63	4.31	2.99	0.43	3.13	2.7	-6.44	0.000264	3.61e-07	Poorly soluble	-9.63	1.71e-07	2.34e-10	Poorly soluble	-5.09	0.006	8.18e-06	Moderately soluble	Low	No	No	No	No	No	No	No	-7.71	3	3	2	1	4	0.11	1	3	3	6.13
GSK-512	C=C1CC[C@@H]2O[C@@]2(CC[C@@H]2[C@H]1CC2(C)C)C	C15H24O	220.35	16	0	0.87	0	1	0	68.27	12.53	3.11	3.56	3.94	3.67	4.07	3.67	-3.45	0.0784	0.000356	Soluble	-3.51	0.0683	0.00031	Soluble	-3.51	0.0681	0.000309	Soluble	High	Yes	No	No	Yes	Yes	No	No	-5.12	0	0	0	0	1	0.55	0	2	2	4.35
GSK-513	O=Cc1cccc2c1ccc1c2C(=O)C(=O)c2c1occ2C	C18H10O4	290.27	22	15	0.06	1	4	0	80.66	64.35	1.91	2.79	3.6	0.9	4.64	2.77	-3.84	0.0424	0.000146	Soluble	-3.8	0.0462	0.000159	Soluble	-6.46	0.0001	3.45e-07	Poorly soluble	High	Yes	No	Yes	Yes	Yes	No	Yes	-6.09	0	0	0	0	0	0.55	2	2	0	3.25
GSK-514	O[C@H]1CCc2c(C1=C)ccc1c2C(=O)C(=O)c2c1occ2C	C18H14O4	294.3	22	11	0.22	0	4	1	81.49	67.51	2.25	2.02	2.95	1.08	4.25	2.51	-3.31	0.145	0.000493	Soluble	-3.07	0.253	0.000861	Soluble	-5.53	0.000877	2.98e-06	Moderately soluble	High	Yes	Yes	Yes	Yes	No	Yes	Yes	-6.66	0	0	0	0	0	0.55	2	1	0	3.97
GSK-515	O=C(O[C@@H](C(=O)O)Cc1ccc(c(c1)O)O)/C=C/c1ccc(c2c1[C@H](C(=O)O[C@@H](C(=O)O)Cc1ccc(c(c1)O)O)[C@H](O2)c1ccc(c(c1)O)O)O	C36H30O16	718.61	52	24	0.17	14	16	9	178.07	278.04	1.65	3.98	2.9	0.25	2.57	2.27	-6.22	0.000433	6.02e-07	Poorly soluble	-9.52	2.17e-07	3.02e-10	Poorly soluble	-4.41	0.0282	3.93e-05	Moderately soluble	Low	No	No	No	No	No	No	No	-7.86	3	3	2	1	4	0.11	1	3	3	6
GSK-516	O=C1c2c3CCCC(=C)c3ccc2c2c(C1=O)c(C)co2	C18H14O3	278.3	21	11	0.22	0	3	0	80.33	47.28	2.59	3.32	3.98	1.93	5.16	3.4	-4.04	0.0251	9.02e-05	Moderately soluble	-3.99	0.0285	0.000103	Soluble	-6.34	0.000128	4.6e-07	Poorly soluble	High	Yes	No	Yes	Yes	Yes	Yes	Yes	-5.64	0	0	0	0	0	0.55	2	1	0	3.5
GSK-517	Cc1coc2c1C(=O)C(=O)c1c2ccc2c1CCC=C(C)c1ccc3c(c1CCCC2=C)C(=O)C(=O)c1c3occ1C	C36H28O6	556.6	42	22	0.22	0	6	0	160.66	94.56	3.97	6.4	7.97	2.48	9	5.96	-7.71	1.08e-05	1.95e-08	Poorly soluble	-8.18	3.69e-06	6.63e-09	Poorly soluble	-12.31	2.72e-10	4.89e-13	Insoluble	Low	No	No	No	No	No	No	No	-5.15	1	3	0	1	1	0.55	2	1	2	5.33
GSK-518	O=C1[C@@H]2OC(=O)[C@]3([C@@H]1C(C)(C)CCC3)c1c2cc(C(C)C)c(c(c1=O)C(=O)C)O	C23H26O6	398.45	29	7	0.57	2	6	1	107.47	97.74	2.67	3.05	3	1.71	4.78	3.04	-4.28	0.021	5.27e-05	Moderately soluble	-4.77	0.00679	1.7e-05	Moderately soluble	-5.53	0.00118	2.96e-06	Moderately soluble	High	No	Yes	No	No	Yes	No	Yes	-6.57	0	0	0	0	0	0.55	0	0	1	5.21
GSK-519	CC(C1=C[C@]23[C@](C1=O)(O)C(=O)O[C@@H]3C1=CCCC([C@H]1CC2)(C)C)C	C20H26O4	330.42	24	0	0.7	1	4	1	91.01	63.6	2.94	3.34	2.95	2.72	3.45	3.08	-3.93	0.0391	0.000118	Soluble	-4.35	0.0147	4.44e-05	Moderately soluble	-3.56	0.0914	0.000277	Soluble	High	Yes	No	No	No	Yes	No	No	-5.94	0	0	0	0	0	0.55	0	2	0	5.47
GSK-520	CO[C@@H]1C[C@@H]2C(=CCCC2(C)C)Cc2c1cc(C(C)C)c(c2O)O	C21H30O3	330.46	24	6	0.62	2	3	2	99.19	49.69	3.42	4.61	4.89	3.51	4.4	4.17	-4.85	0.00471	1.43e-05	Moderately soluble	-5.38	0.00138	4.18e-06	Moderately soluble	-4.72	0.00628	1.9e-05	Moderately soluble	High	Yes	Yes	No	No	No	Yes	No	-5.04	0	0	0	0	0	0.55	1	2	1	4.36
GSK-521	CC(c1cc2CC[C@H]3C(=Cc2c(c1O)O)C=CCC3(C)C)C	C20H26O2	298.42	22	6	0.5	1	2	2	93.62	40.46	3.47	5.32	5.04	4.09	4.35	4.45	-5.18	0.00198	6.64e-06	Moderately soluble	-5.92	0.000358	1.2e-06	Moderately soluble	-4.37	0.0126	4.24e-05	Moderately soluble	High	Yes	No	No	Yes	Yes	No	Yes	-4.34	0	0	0	0	1	0.55	1	1	1	4.13
GSK-522	OCc1coc2c1C(=O)C(=O)c1c2ccc2c1CCCC2(C)C	C19H18O4	310.34	23	11	0.37	1	4	1	85.86	67.51	2.34	3.08	3.28	1.39	4.75	2.97	-3.99	0.0316	0.000102	Soluble	-4.17	0.0212	6.84e-05	Moderately soluble	-6.14	0.000223	7.19e-07	Poorly soluble	High	Yes	Yes	Yes	Yes	Yes	Yes	Yes	-6.01	0	0	0	0	0	0.55	2	1	0	3.76
GSK-523	OCc1coc2c1C(=O)C(=O)c1c2ccc2c1cccc2C	C18H12O4	292.29	22	15	0.11	1	4	1	81.4	67.51	2.18	2.44	3.13	0.97	4.33	2.61	-3.63	0.0688	0.000236	Soluble	-3.5	0.0922	0.000316	Soluble	-6.34	0.000133	4.55e-07	Poorly soluble	High	Yes	No	Yes	No	No	No	Yes	-6.35	0	0	0	0	0	0.55	2	1	0	3.39
GSK-524	O=C1c2c3CCC[C@@](c3ccc2c2c(C1=O)c(C)co2)(C)O	C18H16O4	296.32	22	11	0.33	0	4	1	81.05	67.51	2.34	2.17	3.07	1.16	4.37	2.62	-3.41	0.114	0.000385	Soluble	-3.22	0.178	0.000602	Soluble	-5.75	0.000533	1.8e-06	Moderately soluble	High	Yes	Yes	Yes	Yes	No	Yes	Yes	-6.57	0	0	0	0	0	0.55	2	1	0	4.03
GSK-525	O[C@@H]1CCc2c([C@]1(C)O)ccc1c2C(=O)C(=O)c2c1occ2C	C18H16O5	312.32	23	11	0.33	0	5	2	82.22	87.74	2.07	1.19	2.04	0.33	3.46	1.82	-2.88	0.412	0.00132	Soluble	-2.63	0.735	0.00235	Soluble	-4.93	0.00365	1.17e-05	Moderately soluble	High	No	Yes	Yes	No	No	No	No	-7.36	0	0	0	0	0	0.55	2	1	0	4.34
GSK-526	OC[C@@H]1[C@H](O)CCc2c1ccc1c2C(=O)C(=O)c2c1occ2C	C18H16O5	312.32	23	11	0.33	1	5	2	82.33	87.74	2.07	1.77	2.02	0.33	3.35	1.91	-3.18	0.207	0.000662	Soluble	-3.23	0.184	0.000588	Soluble	-4.73	0.00582	1.86e-05	Moderately soluble	High	No	Yes	Yes	No	No	Yes	No	-6.95	0	0	0	0	0	0.55	2	1	0	4.34
GSK-527	OC(=O)[C@H](Cc1ccc(c(c1)O)O)O	C9H10O5	198.17	14	6	0.22	3	5	4	48	97.99	0.12	-0.2	0.09	-0.04	0.17	0.03	-1.06	17.2	0.0867	Very soluble	-1.4	7.86	0.0397	Very soluble	-0.5	62.1	0.313	Soluble	High	No	No	No	No	No	No	No	-7.65	0	0	0	0	1	0.56	1	1	1	1.91
GSK-528	CC([C@@H]1[C@H]2OCC(c3c2c2c(C1=O)ccc(c2cc3)C)(C)C)C	C21H24O2	308.41	23	10	0.48	1	2	0	94.62	26.3	3.44	4.98	4.64	3.65	5.64	4.47	-5.15	0.00221	7.16e-06	Moderately soluble	-5.27	0.00165	5.35e-06	Moderately soluble	-6.58	8.11e-05	2.63e-07	Poorly soluble	High	Yes	Yes	No	Yes	Yes	Yes	No	-4.65	0	0	0	0	0	0.55	0	0	1	3.96
GSK-529	O=C(O[C@@H](C(=O)O)Cc1ccc(c(c1)O)O)/C=C/c1ccc(c2c1[C@@H](C(=O)O[C@@H](C(=O)O)Cc1ccc(c(c1)O)O)[C@H](O2)c1ccc(c(c1)O)O)O	C36H30O16	718.61	52	24	0.17	14	16	9	178.07	278.04	2.08	3.98	2.9	0.25	2.57	2.36	-6.22	0.000433	6.02e-07	Poorly soluble	-9.52	2.17e-07	3.02e-10	Poorly soluble	-4.41	0.0282	3.93e-05	Moderately soluble	Low	No	No	No	No	No	No	No	-7.86	3	3	2	1	4	0.11	1	3	3	6
GSK-530	O=C(O[C@@H](C(=O)O)Cc1ccc(c(c1)O)O)/C=C/C1=C[C@H]2C=Cc3c(O[C@@H]2C(=C1)O)cc(c(c3)O)O	C26H22O10	494.45	36	12	0.15	7	10	6	127.46	173.98	1.56	3.09	2.97	0.75	1.36	1.94	-4.64	0.0114	2.31e-05	Moderately soluble	-6.41	0.000192	3.88e-07	Poorly soluble	-2.01	4.88	0.00986	Soluble	Low	No	No	No	No	Yes	No	No	-7.12	1	1	1	1	2	0.11	1	2	1	5.4
GSK-531	CC(=CCCc1c(C)ccc2c1C(=O)C(=O)C(=C2)C(C)C)C	C20H24O2	296.4	22	6	0.4	4	2	0	92.73	34.14	3.32	5.21	4.59	3.39	5.88	4.48	-4.9	0.00375	1.27e-05	Moderately soluble	-5.67	0.000627	2.12e-06	Moderately soluble	-5.91	0.000365	1.23e-06	Moderately soluble	High	Yes	No	No	Yes	Yes	No	No	-4.41	0	0	0	0	1	0.55	2	2	1	3.53
GSK-532	C=C[C@@](CC[C@@H]1[C@](C)(O)CC[C@@H]2[C@]1(C)CCCC2(C)C)(O)C	C20H36O2	308.5	22	0	0.9	4	2	2	95.43	40.46	3.54	4.93	4.7	3.93	4.64	4.35	-4.59	0.00785	2.54e-05	Moderately soluble	-5.52	0.000939	3.04e-06	Moderately soluble	-4.24	0.0179	5.79e-05	Moderately soluble	High	Yes	No	No	No	No	Yes	No	-4.68	0	0	0	0	0	0.55	0	1	1	4.3
GSK-533	O=C[C@@]1(C)CCCc2c1ccc1c2C(=O)C(=O)c2c1occ2C	C19H16O4	308.33	23	11	0.32	1	4	0	84.9	64.35	2.35	2.81	3.43	1.31	5.05	2.99	-3.81	0.0478	0.000155	Soluble	-3.82	0.0468	0.000152	Soluble	-6.26	0.000168	5.46e-07	Poorly soluble	High	Yes	No	Yes	Yes	Yes	No	Yes	-6.19	0	0	0	0	0	0.55	2	2	0	4.06
GSK-534	OCc1cccc2c1ccc1c2C(=O)C(=O)c2c1occ2C	C18H12O4	292.29	22	15	0.11	1	4	1	81.4	67.51	2.23	2.44	3.13	0.97	4.33	2.62	-3.63	0.0688	0.000236	Soluble	-3.5	0.0922	0.000316	Soluble	-6.34	0.000133	4.55e-07	Poorly soluble	High	Yes	No	Yes	No	No	No	Yes	-6.35	0	0	0	0	0	0.55	2	1	0	3.32
GSK-535	CC(=O)C[C@@]1(O)C(=O)C2=C(c3c1c1CCCC(c1cc3)(C)C)OC[C@@H]2C	C22H26O4	354.44	26	6	0.55	2	4	1	100.38	63.6	3.06	3.66	3.32	2.18	4.99	3.44	-4.38	0.0147	4.15e-05	Moderately soluble	-4.68	0.00732	2.07e-05	Moderately soluble	-5.8	0.000566	1.6e-06	Moderately soluble	High	Yes	Yes	No	Yes	Yes	No	Yes	-5.86	0	0	0	0	0	0.85	0	0	2	4.82
GSK-536	CC(=O)C[C@@]1(O)C(=O)C2=C(c3c1c1cccc(c1cc3)C)OC[C@@H]2C	C21H20O4	336.38	25	10	0.33	2	4	1	95.92	63.6	2.73	3.02	3.17	1.76	4.55	3.05	-3.99	0.0343	0.000102	Soluble	-4.02	0.0321	9.54e-05	Moderately soluble	-6	0.000336	1e-06	Moderately soluble	High	Yes	Yes	Yes	Yes	Yes	Yes	Yes	-6.21	0	0	0	0	0	0.85	0	0	0	4.48
GSK-537	CCCCCCC/C=C\CCCCCCCOC(=O)C	C18H34O2	282.46	20	0	0.83	15	2	0	89.45	26.3	4.56	6.81	5.81	4.57	6.1	5.57	-4.89	0.00363	1.28e-05	Moderately soluble	-7.17	1.91e-05	6.76e-08	Poorly soluble	-5.69	0.000574	2.03e-06	Moderately soluble	High	Yes	No	Yes	No	No	No	No	-3.19	1	1	1	0	1	0.55	0	1	2	3.05
GSK-538	CC(=C)CCCc1c(C)ccc2c1C(=O)C(=O)C(=C2)C(C)C	C20H24O2	296.4	22	6	0.4	5	2	0	92.73	34.14	3.12	5.52	4.59	3.39	6.05	4.53	-5.03	0.00278	9.39e-06	Moderately soluble	-6	0.000299	1.01e-06	Moderately soluble	-6.28	0.000154	5.2e-07	Poorly soluble	High	Yes	No	No	Yes	Yes	No	No	-4.19	0	0	0	0	1	0.55	2	2	1	3.54
GSK-539	CC(C1=C2OC(c3c2c2c(C1=O)ccc(c2cc3)C)(C)C)C	C20H20O2	292.37	22	10	0.35	1	2	0	90.13	26.3	3.47	4.54	4.87	3.35	5.77	4.4	-4.78	0.00482	1.65e-05	Moderately soluble	-4.81	0.00448	1.53e-05	Moderately soluble	-6.74	5.32e-05	1.82e-07	Poorly soluble	High	Yes	Yes	Yes	Yes	Yes	Yes	Yes	-4.86	0	0	0	0	0	0.85	0	0	1	3.6
GSK-540	O=C1O[C@H]2C[C@H]3[C@]1(CCCC3(C)C)c1c2cc(c(c1O)O)C(C)C	C20H26O4	330.42	24	6	0.65	1	4	2	92.83	66.76	2.89	4.38	3.96	3.25	4.05	3.71	-4.77	0.00565	1.71e-05	Moderately soluble	-5.5	0.00105	3.17e-06	Moderately soluble	-4.45	0.0116	3.52e-05	Moderately soluble	High	Yes	Yes	No	No	Yes	No	No	-5.21	0	0	0	0	0	0.55	1	1	1	4.88
GSK-541	C[C@H]1COC2=C1C(=O)C(=O)c1c2ccc2c1CCCC2(C)C	C19H20O3	296.36	22	6	0.47	0	3	0	85.13	43.37	2.81	3.8	3.44	2.36	4.76	3.43	-4.27	0.0158	5.33e-05	Moderately soluble	-4.41	0.0117	3.93e-05	Moderately soluble	-5.57	0.000807	2.72e-06	Moderately soluble	High	Yes	Yes	Yes	Yes	Yes	No	Yes	-5.41	0	0	0	0	0	0.85	2	1	1	4.11
GSK-542	C1CCCCCCCCCCCCC1	C14H28	196.37	14	0	1	0	0	0	67.3	0	3.35	5.18	5.46	5.54	4.46	4.8	-4.32	0.00938	4.78e-05	Moderately soluble	-4.93	0.00233	1.18e-05	Moderately soluble	-3.78	0.0324	0.000165	Soluble	Low	No	No	No	No	No	No	No	-3.82	1	0	0	0	3	0.55	0	0	2	2.42
GSK-543	OC[C@H](C1=C(O)C(=O)c2c(C1=O)ccc1c2cccc1C)C	C18H16O4	296.32	22	10	0.22	2	4	2	83.87	74.6	2.34	2.83	2.97	1.08	3.72	2.59	-3.66	0.0642	0.000217	Soluble	-4.05	0.0261	8.82e-05	Moderately soluble	-5	0.00297	1e-05	Moderately soluble	High	Yes	No	Yes	Yes	Yes	No	No	-6.1	0	0	0	0	0	0.85	1	0	0	3.53
GSK-544	CC(C1=C(O)C(=O)c2c(C1=O)ccc1c2cccc1C)C	C18H16O3	280.32	21	10	0.22	1	3	1	82.71	54.37	2.63	4.05	4	1.93	4.34	3.39	-4.42	0.0108	3.84e-05	Moderately soluble	-4.9	0.00356	1.27e-05	Moderately soluble	-5.56	0.000769	2.74e-06	Moderately soluble	High	Yes	No	Yes	Yes	Yes	No	Yes	-5.13	0	0	0	0	0	0.85	1	0	1	2.95
GSK-545	CC1=C(O)C(=O)c2c(C1=O)ccc1c2cccc1C	C16H12O3	252.26	19	10	0.12	0	3	1	73.09	54.37	2.22	3.29	3.36	1.45	3.75	2.81	-3.87	0.0343	0.000136	Soluble	-4.11	0.0197	7.82e-05	Moderately soluble	-5.13	0.00185	7.35e-06	Moderately soluble	High	Yes	No	Yes	Yes	No	No	Yes	-5.5	0	0	0	0	0	0.85	1	0	0	2.76
GSK-546	OC[C@]1(C)[C@@H](C)COC2=C1C(=O)c1c(C2=O)c2cccc(c2cc1)C	C21H20O4	336.38	25	10	0.33	1	4	1	95.43	63.6	2.16	3.74	3.45	1.76	4.56	3.13	-4.51	0.0104	3.08e-05	Moderately soluble	-4.77	0.00574	1.71e-05	Moderately soluble	-6.22	0.000203	6.04e-07	Poorly soluble	High	Yes	Yes	Yes	Yes	Yes	No	Yes	-5.7	0	0	0	0	0	0.85	1	0	1	4.54
GSK-547	C[C@H]1CO[C@]2(C1)OCC(=O)c1c2ccc2c1cccc2C	C18H18O3	282.33	21	10	0.39	0	3	0	81.13	35.53	3.01	3.5	3.46	2.76	4.29	3.41	-4.15	0.0201	7.11e-05	Moderately soluble	-3.93	0.0332	0.000118	Soluble	-5.63	0.000659	2.33e-06	Moderately soluble	High	Yes	Yes	No	Yes	Yes	Yes	No	-5.54	0	0	0	0	0	0.55	0	0	0	4.25
GSK-548	C[C@@H]1CO[C@@]2(C1)OC(=O)c1c2ccc2c1CCCC2(C)C	C18H22O3	286.37	21	6	0.61	0	3	0	80.78	35.53	3.13	4.33	3.57	4.05	4.46	3.91	-4.55	0.00798	2.79e-05	Moderately soluble	-4.79	0.00464	1.62e-05	Moderately soluble	-5.16	0.00198	6.92e-06	Moderately soluble	High	Yes	Yes	No	Yes	Yes	Yes	Yes	-4.97	0	0	0	0	0	0.55	0	0	1	4.36
GSK-549	CC[C@H](C(C)C)CC[C@H]([C@H]1CC[C@@H]2[C@]1(C)CC[C@H]1[C@H]2CC=C2[C@]1(C)CC[C@@H](C2)O[C@@H]1O[C@H](CO)[C@H]([C@@H]([C@H]1O)O)O)C	C35H60O6	576.85	41	0	0.94	9	6	4	165.61	99.38	5.5	7.74	5.85	3.96	5.02	5.61	-7.7	1.15e-05	2e-08	Poorly soluble	-9.67	1.23e-07	2.14e-10	Poorly soluble	-4.4	0.0228	3.94e-05	Moderately soluble	Low	No	No	No	No	No	No	No	-4.32	1	4	0	0	1	0.55	0	1	3	8.02
GSK-550	OC[C@@]12CCC(=C)[C@@H]([C@H]2C2=CC[C@H]3[C@@]([C@@]2(CC1)C)(C)CC[C@H]1[C@]3(C)CC[C@H](C1(C)C)O)C	C30H48O2	440.7	32	0	0.87	1	2	2	135.83	40.46	4.27	6.61	6.92	5.89	6.18	5.97	-6.67	9.41e-05	2.13e-07	Poorly soluble	-7.26	2.42e-05	5.49e-08	Poorly soluble	-6.37	0.000187	4.24e-07	Poorly soluble	Low	No	No	No	No	No	No	No	-4.3	1	3	0	1	1	0.55	0	1	2	6.32
GSK-551	CC(C1=C(O)C(=O)c2c(C1=O)ccc1c2CCCC1(C)C)C	C19H22O3	298.38	22	6	0.47	1	3	1	87.16	54.37	3.06	4.69	4.15	2.36	4.76	3.8	-4.78	0.00495	1.66e-05	Moderately soluble	-5.56	0.000822	2.76e-06	Moderately soluble	-5.36	0.00129	4.33e-06	Moderately soluble	High	Yes	No	Yes	Yes	Yes	No	Yes	-4.79	0	0	0	0	0	0.85	1	0	1	3.29
GSK-552	C[C@@H]1COC2=C1C(=O)c1c(C2=O)c2cccc(c2cc1)C	C18H14O3	278.3	21	10	0.22	0	3	0	80.11	43.37	2.53	3.62	3.45	1.93	4.35	3.18	-4.2	0.0176	6.33e-05	Moderately soluble	-4.22	0.0168	6.05e-05	Moderately soluble	-5.76	0.00048	1.73e-06	Moderately soluble	High	Yes	No	Yes	Yes	Yes	Yes	Yes	-5.43	0	0	0	0	0	0.85	1	0	1	3.75
GSK-553	C[C@H]1COc2c1oc(=O)c1c2ccc2c1cccc2C	C17H14O3	266.29	20	14	0.24	0	3	0	79.11	39.44	2.91	3.59	3.75	3	4.54	3.56	-4.27	0.0143	5.36e-05	Moderately soluble	-4.1	0.0209	7.86e-05	Moderately soluble	-6.12	0.0002	7.52e-07	Poorly soluble	High	Yes	No	Yes	Yes	Yes	No	No	-5.38	0	0	0	0	0	0.55	0	1	1	3.51
GSK-554	C[C@@H]1COC2=C1C(=O)C(=O)c1c2ccc2c1cccc2C	C18H14O3	278.3	21	10	0.22	0	3	0	80.68	43.37	2.46	3.16	3.29	1.93	4.35	3.04	-3.91	0.0343	0.000123	Soluble	-3.74	0.0505	0.000182	Soluble	-5.76	0.00048	1.73e-06	Moderately soluble	High	Yes	No	Yes	Yes	Yes	Yes	Yes	-5.75	0	0	0	0	0	0.85	2	1	0	3.74
GSK-555	C=C[C@]1(C)CCCCC1(C(=C)C)C(=C)C	C15H24	204.35	15	0	0.6	3	0	0	70.16	0	3.2	6.57	4.89	4.53	4.9	4.82	-5.05	0.00183	8.95e-06	Moderately soluble	-6.37	8.74e-05	4.28e-07	Poorly soluble	-4.03	0.0191	9.33e-05	Moderately soluble	Low	No	No	No	No	Yes	No	No	-2.88	1	0	0	0	2	0.55	0	1	2	3.31
GSK-556	COC(=O)[C@H](Cc1ccc(c(c1)O)O)OC(=O)/C=C/c1ccc(c2c1[C@H](C(=O)O[C@H](C(=O)OC)Cc1ccc(c(c1)O)O)[C@@H](O2)c1ccc(c(c1)O)O)O	C38H34O16	746.67	54	24	0.21	16	16	7	186.71	256.04	2.94	4.63	3.08	0.61	3.7	2.99	-6.66	0.000164	2.19e-07	Poorly soluble	-9.73	1.38e-07	1.85e-10	Poorly soluble	-5.77	0.00127	1.71e-06	Moderately soluble	Low	No	No	No	No	No	No	No	-7.57	3	3	2	1	5	0.17	1	3	3	6.26
GSK-557	COC(=O)[C@@H](Cc1ccc(c(c1)O)O)OC(=O)/C=C/c1ccc(c2c1[C@@H](C(=O)OC)[C@H](O2)c1ccc(c(c1)O)O)O	C29H26O12	566.51	41	18	0.21	11	12	5	142.47	189.28	2.49	3.43	2.51	0.84	2.97	2.45	-5.11	0.00438	7.72e-06	Moderately soluble	-7.09	4.65e-05	8.22e-08	Poorly soluble	-4.51	0.0173	3.06e-05	Moderately soluble	Low	No	No	No	No	Yes	No	No	-7.32	2	2	2	1	2	0.17	1	3	2	5.24
GSK-558	C[C@H]1CO[C@]2(C1)OCC(=O)[C@H]1[C@H]2C=Cc2c1cccc2C	C18H20O3	284.35	21	6	0.5	0	3	0	80.99	35.53	2.71	3.06	2.96	2.62	3.4	2.95	-3.74	0.0515	0.000181	Soluble	-3.47	0.0958	0.000337	Soluble	-4.13	0.0208	7.33e-05	Moderately soluble	High	Yes	No	No	No	Yes	Yes	No	-5.86	0	0	0	0	0	0.55	0	0	0	4.97
GSK-559	CCOC(=O)[C@H]1[C@H](Oc2c1c(ccc2)/C=C/C(=O)O[C@@H](C(=O)O)Cc1ccccc1)c1ccc(cc1)O	C29H26O8	502.51	37	18	0.21	11	8	2	134.86	119.36	2.74	4.89	3.99	2.83	4.68	3.83	-5.67	0.00107	2.14e-06	Moderately soluble	-7.13	3.71e-05	7.38e-08	Poorly soluble	-6.59	0.000128	2.55e-07	Poorly soluble	High	No	Yes	No	No	Yes	No	Yes	-5.89	1	2	1	0	0	0.56	0	2	3	5.03
GSK-560	CC(c1cc2CC[C@@H]3[C@](c2cc1O)(C)CCCC3(C)C)C	C20H30O	286.45	21	6	0.7	1	1	1	91.64	20.23	3.62	6.71	5.55	4.92	5.5	5.26	-5.99	0.000294	1.03e-06	Moderately soluble	-6.94	3.3e-05	1.15e-07	Poorly soluble	-5.77	0.000491	1.71e-06	Moderately soluble	High	Yes	No	No	Yes	Yes	Yes	No	-3.28	1	0	0	0	2	0.55	0	0	1	3.33
GSK-561	C[C@@H]1COC2=C1C(=O)c1c(C2=O)c2CCCC(c2cc1)(C)C	C19H20O3	296.36	22	6	0.47	0	3	0	84.56	43.37	2.87	4.26	3.6	2.36	4.76	3.57	-4.56	0.00811	2.73e-05	Moderately soluble	-4.88	0.00388	1.31e-05	Moderately soluble	-5.57	0.000807	2.72e-06	Moderately soluble	High	Yes	No	Yes	Yes	Yes	No	Yes	-5.08	0	0	0	0	0	0.85	1	0	1	4.03
GSK-562	O=C(O[C@H](C(=O)O)Cc1ccc(c(c1)O)O)/C=C\c1ccc(c2c1C=Cc1c(O2)cc(c(c1)O)O)O	C26H20O10	492.43	36	18	0.08	7	10	6	128.86	173.98	2.06	4.03	3.42	1.22	2.53	2.65	-5.34	0.00225	4.57e-06	Moderately soluble	-7.39	2.02e-05	4.1e-08	Poorly soluble	-3.82	0.075	0.000152	Soluble	Low	No	No	No	No	Yes	No	No	-6.44	1	1	1	1	2	0.11	1	3	2	4.54
GSK-563	OC[C@@]1(C)CCCc2c1ccc1c2C(=O)c2c(C1=O)c(co2)C	C19H18O4	310.34	23	11	0.37	1	4	1	85.07	67.51	2.56	3.48	2.95	1.39	4.75	3.02	-4.24	0.0177	5.7e-05	Moderately soluble	-4.58	0.00816	2.63e-05	Moderately soluble	-6.14	0.000223	7.19e-07	Poorly soluble	High	Yes	Yes	Yes	Yes	Yes	Yes	Yes	-5.72	0	0	0	0	0	0.55	1	0	0	3.92
GSK-564	O=C1c2c3CCCC(c3ccc2C(=O)c2c1occ2C)(C)C	C19H18O3	294.34	22	11	0.37	0	3	0	83.91	47.28	2.92	4.88	3.98	2.24	5.37	3.88	-5.11	0.00229	7.77e-06	Moderately soluble	-5.61	0.000726	2.47e-06	Moderately soluble	-6.71	5.77e-05	1.96e-07	Poorly soluble	High	Yes	No	Yes	Yes	Yes	Yes	Yes	-4.63	0	0	0	0	0	0.55	1	0	1	3.44
GSK-565	Cc1coc2c1C(=O)c1c(C2=O)c2cccc(c2cc1)C	C18H12O3	276.29	21	15	0.11	0	3	0	79.45	47.28	2.52	4.25	3.83	1.82	4.95	3.47	-4.76	0.00481	1.74e-05	Moderately soluble	-4.95	0.00307	1.11e-05	Moderately soluble	-6.91	3.44e-05	1.24e-07	Poorly soluble	High	Yes	No	Yes	Yes	Yes	No	No	-4.97	0	0	0	0	0	0.55	1	0	1	3.23
GSK-566	O=C(O[C@@H](C(=O)O)Cc1ccc(c(c1)O)O)/C=C/c1ccc(c2c1[C@H](C(=O)O)[C@H](O2)c1ccc(c(c1)O)O)O	C27H22O12	538.46	39	18	0.15	9	12	7	133.83	211.28	0.67	2.78	2.34	0.45	1.85	1.62	-4.68	0.0113	2.1e-05	Moderately soluble	-6.87	7.22e-05	1.34e-07	Poorly soluble	-3.14	0.387	0.000718	Soluble	Low	No	No	No	No	No	No	No	-7.61	3	2	1	1	3	0.11	1	2	2	4.98
GSK-567	C=C[C@](CC[C@@]1(C)C(=C)CC[C@@H]2[C@]1(C)CCCC2(C)C)(O)C	C21H36O	304.51	22	0	0.81	4	1	1	98.3	20.23	3.94	6.26	5.89	4.97	5.92	5.4	-5.41	0.00119	3.91e-06	Moderately soluble	-6.47	0.000103	3.37e-07	Poorly soluble	-5.43	0.00113	3.72e-06	Moderately soluble	High	No	No	No	Yes	Yes	Yes	No	-3.71	1	1	0	1	2	0.55	0	1	1	4.15
GSK-568	COC(=O)[C@@H](Cc1ccc(c(c1)O)O)OC(=O)/C=C\c1ccc(c(c1)O)O	C19H18O8	374.34	27	12	0.16	8	8	4	95.72	133.52	1.54	2.69	1.74	1.13	2.05	1.83	-3.66	0.0826	0.000221	Soluble	-5.15	0.00267	7.14e-06	Moderately soluble	-2.87	0.508	0.00136	Soluble	High	No	No	No	No	No	No	No	-6.67	0	0	0	1	0	0.55	1	3	2	3.52
GSK-569	COC(=O)[C@@]1(C)CCCc2c1ccc1c2C(=O)C(=O)c2c1occ2C	C20H18O5	338.35	25	11	0.35	2	5	0	90.79	73.58	2.82	3.2	3.4	1.52	4.82	3.15	-4.15	0.0241	7.12e-05	Moderately soluble	-4.42	0.013	3.83e-05	Moderately soluble	-6.37	0.000143	4.23e-07	Poorly soluble	High	Yes	No	Yes	Yes	Yes	No	Yes	-6.09	0	0	0	0	0	0.55	2	1	0	4.18
GSK-570	CC(C1=Cc2ccc(c3c2[C@@](C1=O)(O)C(C)(C)CCC3)C)C	C20H26O2	298.42	22	6	0.55	1	2	1	91.45	37.3	2.96	4.76	3.95	3.55	5.18	4.08	-4.82	0.00447	1.5e-05	Moderately soluble	-5.27	0.00159	5.32e-06	Moderately soluble	-5.63	0.000696	2.33e-06	Moderately soluble	High	Yes	No	No	Yes	Yes	No	Yes	-4.74	0	0	0	0	0	0.55	0	0	1	4.03
GSK-571	CC(C1=C(O)C(=O)c2c(C1=O)ccc1c2C(=O)CCC1(C)C)C	C19H20O4	312.36	23	6	0.42	1	4	1	87.59	71.44	2.44	3.41	3.79	1.43	4.45	3.1	-4.05	0.0277	8.87e-05	Moderately soluble	-4.59	0.00803	2.57e-05	Moderately soluble	-5.25	0.00177	5.68e-06	Moderately soluble	High	Yes	No	Yes	Yes	Yes	No	Yes	-5.78	0	0	0	0	0	0.85	1	0	0	3.26
GSK-572	C[C@H]1COC2=C1C(=O)C(=C1C2=CC(=O)C2=C1CCCC2(C)C)O	C19H20O4	312.36	23	0	0.47	0	4	1	85.89	63.6	2.76	2.15	3.32	1.51	3.46	2.64	-3.13	0.231	0.000739	Soluble	-3.12	0.238	0.000762	Soluble	-3.82	0.0468	0.00015	Soluble	High	Yes	Yes	No	Yes	Yes	No	No	-6.68	0	0	0	0	0	0.85	0	0	0	4.59
GSK-573	O=c1cc2c(cc(c1O)C)[C@H]1OC[C@]32CCCC([C@@H]3C1)(C)C	C19H24O3	300.39	22	7	0.63	0	3	1	87.26	46.53	3.15	2.78	3.28	2.75	4.33	3.26	-3.69	0.0614	0.000205	Soluble	-3.41	0.116	0.000386	Soluble	-5.04	0.00271	9.04e-06	Moderately soluble	High	Yes	Yes	No	No	No	Yes	No	-6.16	0	0	0	0	0	0.55	0	0	0	4.58
GSK-574	CC(C1=Cc2ccc3c(c2C(=O)C1=O)CCCC3(C)C)C	C19H22O2	282.38	21	6	0.47	1	2	0	86.16	34.14	2.84	4.88	4	3.24	5.27	4.04	-4.81	0.00437	1.55e-05	Moderately soluble	-5.33	0.00131	4.65e-06	Moderately soluble	-5.73	0.000531	1.88e-06	Moderately soluble	High	Yes	No	No	No	Yes	No	No	-4.56	0	0	0	0	0	0.55	2	1	1	3.44
GSK-575	O=C1CCC(C2=CC=C3[C@@H]([C@H]12)C(=O)C(=CC3=O)O)(C)C	C16H16O4	272.3	20	0	0.44	0	4	1	73.17	71.44	1.91	1.22	2.07	0.8	2.19	1.64	-2.3	1.37	0.00505	Soluble	-2.32	1.31	0.00481	Soluble	-2.41	1.05	0.00387	Soluble	High	Yes	No	No	No	No	No	No	-7.09	0	0	0	0	0	0.85	0	0	0	4.48
GSK-576	CC1=C(O)C(=O)c2c(C1=O)ccc1c2CCCC1(C)C	C17H18O3	270.32	20	6	0.41	0	3	1	77.55	54.37	2.62	3.93	3.51	1.89	4.17	3.22	-4.21	0.0165	6.11e-05	Moderately soluble	-4.77	0.00458	1.69e-05	Moderately soluble	-4.94	0.00311	1.15e-05	Moderately soluble	High	Yes	No	Yes	Yes	Yes	No	Yes	-5.16	0	0	0	0	0	0.85	1	0	1	3.09
GSK-577	OC[C@H](C1=C(O)c2c(C(=O)C1=O)c1CCCC(c1cc2)(C)C)C	C19H22O4	314.38	23	6	0.47	2	4	2	88.9	74.6	2.18	3.02	2.96	1.51	4.15	2.76	-3.75	0.0555	0.000177	Soluble	-4.25	0.0176	5.6e-05	Moderately soluble	-4.8	0.00499	1.59e-05	Moderately soluble	High	Yes	Yes	No	Yes	No	No	No	-6.07	0	0	0	0	0	0.85	2	1	0	4.01
GSK-578	Cc1cc2[C@H]3OC[C@@]4(c2cc1O)[C@@H](C3)C(C)(C)CCC4	C18H24O2	272.38	20	6	0.67	0	2	1	80.99	29.46	2.85	4.24	3.92	3.53	4.27	3.76	-4.42	0.0103	3.78e-05	Moderately soluble	-4.57	0.00734	2.69e-05	Moderately soluble	-4.73	0.00507	1.86e-05	Moderately soluble	High	Yes	Yes	No	No	Yes	Yes	No	-4.95	0	0	0	0	0	0.55	0	0	1	4.41
GSK-579	O=C1c2c3CCCC(=O)c3ccc2c2c(C1=O)c(C)co2	C17H12O4	280.27	21	11	0.24	0	4	0	75.62	64.35	2.03	2.18	3.15	0.84	4.47	2.54	-3.34	0.128	0.000458	Soluble	-3.16	0.192	0.000684	Soluble	-5.84	0.000406	1.45e-06	Moderately soluble	High	Yes	No	Yes	Yes	No	No	Yes	-6.46	0	0	0	0	0	0.55	2	1	0	3.4
GSK-580	OC(=O)C1=C[C@]2(OC(=O)C(=C2)C)[C@H]2OC[C@]31CCCC([C@@H]3C2)(C)C	C19H24O5	332.39	24	0	0.68	1	5	1	87.7	72.83	2.5	3.07	2.85	2.47	2.69	2.72	-3.77	0.0566	0.00017	Soluble	-4.27	0.018	5.42e-05	Moderately soluble	-2.92	0.399	0.0012	Soluble	High	Yes	Yes	No	No	No	No	No	-6.15	0	0	0	0	0	0.85	0	0	0	6.26
GSK-581	O=C(O[C@@H](C(=O)O)Cc1ccc(c(c1)O)O)/C=C\c1ccc(c(c1CC(=O)O)O)O	C20H18O10	418.35	30	12	0.15	9	10	6	102.94	181.82	1.15	1.83	1.28	0.55	1.41	1.25	-3.29	0.215	0.000514	Soluble	-5.27	0.00225	5.39e-06	Moderately soluble	-1.91	5.19	0.0124	Soluble	Low	No	No	No	No	No	No	No	-7.55	1	0	1	1	2	0.11	1	2	2	3.79
GSK-582	OC(=O)/C=C/c1ccc(c2c1C[C@H](O2)c1ccc(c(c1)O)O)O	C17H14O6	314.29	23	12	0.12	3	6	4	83.01	107.22	1.73	2.34	2.14	1.12	2.12	1.89	-3.45	0.111	0.000354	Soluble	-4.23	0.0185	5.87e-05	Moderately soluble	-2.7	0.631	0.00201	Soluble	High	No	Yes	No	No	No	No	No	-6.56	0	0	0	0	0	0.56	1	2	0	3.36
GSK-583	OC(=O)/C=C/c1ccc(c2c1[C@H](C(=O)O)[C@H](O2)c1ccc(c(c1)O)O)O	C18H14O8	358.3	26	12	0.11	4	8	5	89.59	144.52	0.95	1.58	1.77	0.51	1.17	1.2	-3.13	0.263	0.000734	Soluble	-4.23	0.0213	5.95e-05	Moderately soluble	-1.81	5.51	0.0154	Soluble	Low	No	Yes	No	No	No	No	No	-7.36	0	0	1	1	0	0.56	1	2	1	3.9
GSK-584	O=C(O[C@@H](C(=O)O)Cc1ccc(c(c1)O)O)/C=C\c1ccc(c(c1)O)O	C18H16O8	360.31	26	12	0.11	7	8	5	91.4	144.52	1.48	2.36	1.65	0.9	1.5	1.58	-3.44	0.131	0.000363	Soluble	-5.04	0.00332	9.22e-06	Moderately soluble	-2.17	2.41	0.0067	Soluble	Low	No	No	No	No	No	No	No	-6.82	0	0	1	1	0	0.56	1	2	1	3.38
GSK-585	O=C1OC[C@@]23[C@H]1C=CC[C@]3(O)[C@@]1(C(=CC2)C(=O)O[C@H](C1)c1cocc1)C	C20H20O6	356.37	26	5	0.5	1	6	1	89.62	85.97	2.3	1.82	2.13	1.68	2.41	2.07	-3.27	0.19	0.000534	Soluble	-3.25	0.203	0.000569	Soluble	-3.58	0.0931	0.000261	Soluble	High	No	Yes	No	No	No	No	No	-7.18	0	0	0	0	0	0.55	0	2	1	5.47
GSK-586	OC(=O)[C@@H](Cc1ccc(c(c1)O)O)O	C9H10O5	198.17	14	6	0.22	3	5	4	48	97.99	0.68	-0.2	0.09	-0.04	0.17	0.14	-1.06	17.2	0.0867	Very soluble	-1.4	7.86	0.0397	Very soluble	-0.5	62.1	0.313	Soluble	High	No	No	No	No	No	No	No	-7.65	0	0	0	0	1	0.56	1	1	1	1.91
GSK-587	OC(=O)[C@H](OC(=O)[C@@H](Cc1ccc(c(c1)O)O)O)Cc1ccc(c(c1)O)O	C18H18O9	378.33	27	12	0.22	8	9	6	92.24	164.75	1.38	1.62	0.65	0.2	0.92	0.95	-3.01	0.372	0.000984	Soluble	-4.69	0.00769	2.03e-05	Moderately soluble	-1.95	4.25	0.0112	Soluble	Low	No	No	No	No	No	No	No	-7.46	1	0	1	1	2	0.11	1	1	2	3.4
GSK-588	O=C(O[C@@H](C(=O)O)Cc1ccc(c(c1)O)O)/C=C/c1ccc(c(c1/C=C/c1ccc(c(c1)O)O)O)O	C26H22O10	494.45	36	18	0.08	9	10	7	130.81	184.98	2.19	3.92	3.02	1.34	2.85	2.66	-5.15	0.00349	7.06e-06	Moderately soluble	-7.5	1.55e-05	3.14e-08	Poorly soluble	-3.51	0.154	0.000312	Soluble	Low	No	No	No	No	Yes	No	No	-6.53	1	2	1	1	2	0.11	1	3	3	4.18
GSK-589	O=C(O[C@H](C(=O)O)Cc1ccc(c(c1)O)O)/C=C/c1ccc(c2c1cc(o2)c1ccc(c(c1)O)O)O	C26H20O10	492.43	36	21	0.08	8	10	6	128.63	177.89	2.08	4.07	3.77	0.88	3.09	2.78	-5.36	0.00215	4.36e-06	Moderately soluble	-7.51	1.52e-05	3.09e-08	Poorly soluble	-4.88	0.00645	1.31e-05	Moderately soluble	Low	No	No	No	No	Yes	No	No	-6.41	1	1	1	1	2	0.11	1	2	3	4.38
GSK-590	O=C(O[C@@H](C(=O)O)Cc1ccc(c(c1)O)O)/C=C/c1ccc(c(c1CC(=O)O)O)O	C20H18O10	418.35	30	12	0.15	9	10	6	102.94	181.82	1.15	1.83	1.28	0.55	1.41	1.25	-3.29	0.215	0.000514	Soluble	-5.27	0.00225	5.39e-06	Moderately soluble	-1.91	5.19	0.0124	Soluble	Low	No	No	No	No	No	No	No	-7.55	1	0	1	1	2	0.11	1	2	2	3.79
GSK-591	O=C(O[C@@H](C(=O)O)Cc1ccc(c(c1)O)O)/C=C/c1ccc(c(c1/C(=C/c1ccc(c(c1)O)O)/C(=O)O[C@@H](C(=O)O)Cc1ccc(c(c1)O)O)O)O	C36H30O16	718.61	52	24	0.11	15	16	10	181.63	289.04	1.71	4.44	3.15	0.58	2.82	2.54	-6.44	0.000258	3.6e-07	Poorly soluble	-10.23	4.25e-08	5.91e-11	Insoluble	-4.09	0.0584	8.13e-05	Moderately soluble	Low	No	No	No	No	No	No	No	-7.53	3	3	2	1	4	0.11	1	4	3	5.59
GSK-592	OC(=O)/C=C/c1ccc(c(c1/C=C/c1ccc(c(c1)O)O)O)O	C17H14O6	314.29	23	12	0	4	6	5	86.57	118.22	0.85	2.72	2.45	1.44	2.12	1.92	-3.62	0.0747	0.000238	Soluble	-4.86	0.00437	1.39e-05	Moderately soluble	-2.15	2.22	0.00706	Soluble	High	No	No	No	No	Yes	No	Yes	-6.29	0	0	0	0	0	0.56	1	3	0	2.78
GSK-593	OC(=O)[C@@H]1Cc2ccc(c3c2C(=Cc2ccc(c(c2O3)O)O)C1=O)O	C18H12O7	340.28	25	12	0.11	1	7	4	87.2	124.29	1.52	2.69	2.17	0.75	1.7	1.77	-3.93	0.0396	0.000117	Soluble	-4.95	0.00379	1.12e-05	Moderately soluble	-3.06	0.296	0.000869	Soluble	High	No	No	Yes	No	Yes	No	No	-6.47	0	0	0	0	0	0.56	1	3	0	3.89
GSK-594	O=C(O[C@@H](C(=O)O)Cc1ccc(c(c1)O)O)/C=C/c1ccc2c(c1)O[C@@H]([C@H](O2)c1ccc(c(c1)O)O)C(=O)O	C27H22O12	538.46	39	18	0.15	9	12	6	133.33	200.28	2.02	3.24	2.29	0.45	1.91	1.98	-4.97	0.00581	1.08e-05	Moderately soluble	-7.12	4.09e-05	7.6e-08	Poorly soluble	-3.46	0.187	0.000348	Soluble	Low	No	No	No	No	No	No	No	-7.28	3	2	1	1	3	0.11	1	2	2	4.93
GSK-595	CC(=O)C1=C[C@@H]2C=CC3=C([C@H]2C=C1O)CCCC3(C)C	C18H22O2	270.37	20	0	0.5	1	2	1	81.91	37.3	1.74	3.78	4.27	3.09	3.13	3.2	-3.83	0.0398	0.000147	Soluble	-4.26	0.015	5.53e-05	Moderately soluble	-2.83	0.397	0.00147	Soluble	High	Yes	No	No	Yes	Yes	No	Yes	-5.27	0	0	0	0	0	0.55	0	0	1	4.69
GSK-596	O[C@@H]1CC(C)(C)[C@@H]2[C@](C1)(C)c1cc(O)c(cc1CC2)C(C)C	C20H30O2	302.45	22	6	0.7	1	2	2	92.8	40.46	3.11	5.18	4.52	3.99	4.6	4.28	-5.11	0.00232	7.68e-06	Moderately soluble	-5.78	0.000506	1.67e-06	Moderately soluble	-4.95	0.00336	1.11e-05	Moderately soluble	High	Yes	No	No	No	No	Yes	No	-4.47	0	0	0	0	1	0.55	0	0	1	3.62
GSK-597	O=c1c(O)cc2c(cc1C)ccc1c2CCCC1(C)C	C18H20O2	268.35	20	11	0.39	0	2	1	84.14	37.3	3.03	4.91	3.83	3.2	4.98	3.99	-5	0.00266	9.91e-06	Moderately soluble	-5.43	0.000998	3.72e-06	Moderately soluble	-6.08	0.000222	8.26e-07	Poorly soluble	High	Yes	No	Yes	Yes	No	Yes	No	-4.45	0	0	0	0	0	0.55	0	0	1	2.24
GSK-598	CC(=C)CCCc1c(C)ccc2c1C(=O)C(=C(C2=O)C(C)C)O	C20H24O3	312.4	23	6	0.4	5	3	1	93.73	54.37	3.58	5.33	4.74	2.51	5.56	4.34	-5	0.00314	1e-05	Moderately soluble	-6.22	0.000187	5.97e-07	Poorly soluble	-5.92	0.000376	1.2e-06	Moderately soluble	High	Yes	No	No	Yes	Yes	No	Yes	-4.42	0	0	0	0	1	0.85	1	1	1	3.37
GSK-599	OC[C@H]1O[C@@H](O[C@@H]2OC=C([C@@H]3[C@H]2[C@@](C)(O)C[C@H]3O)C(=O)OC)[C@@H]([C@H]([C@@H]1O)O)O	C17H26O11	406.38	28	0	0.82	5	11	6	88.57	175.37	2.26	-2.61	-3.04	-2.52	-2.67	-1.72	-0.39	167	0.412	Very soluble	-0.53	121	0.298	Very soluble	2.29	79400	195	Soluble	Low	No	No	No	No	No	No	No	-10.63	2	1	1	1	4	0.11	0	0	1	5.89
GSK-600	COC(=O)C1=CO[C@H]([C@H]2[C@@H]1[C@H](O)C[C@]2(C)O)O	C11H16O6	244.24	17	0	0.73	2	6	3	56.18	96.22	1.73	-1.02	-0.86	-0.6	-0.65	-0.28	-0.58	64.3	0.263	Very soluble	-0.51	74.9	0.307	Very soluble	0.6	968	3.96	Soluble	High	No	Yes	No	No	No	No	No	-8.51	0	1	0	0	0	0.56	0	0	1	4.72
GSK-601	O=C1C[C@H]2C(C)(C)CCC[C@@]2(c2c1cc(C(C)C)c(c2)O)C	C20H28O2	300.44	22	6	0.65	1	2	1	92.06	37.3	3.29	5.62	5.19	3.9	5.19	4.64	-5.38	0.00125	4.18e-06	Moderately soluble	-6.17	0.000205	6.82e-07	Poorly soluble	-5.65	0.000674	2.24e-06	Moderately soluble	High	Yes	No	No	Yes	Yes	No	No	-4.14	0	0	0	0	1	0.55	0	0	1	3.45
GSK-602	OC[C@]1(O)CCCc2c1ccc1c2C(=O)C(=O)c2c1occ2C	C18H16O5	312.32	23	11	0.33	1	5	2	82.22	87.74	2.2	1.12	2.04	0.33	3.75	1.89	-2.77	0.531	0.0017	Soluble	-2.56	0.868	0.00278	Soluble	-5.18	0.00206	6.61e-06	Moderately soluble	High	No	Yes	Yes	No	No	No	No	-7.41	0	0	0	0	0	0.55	2	1	0	4.07
GSK-603	O[C@H]1CCc2c([C@@]1(C)O)ccc1c2C(=O)C(=O)c2c1occ2C	C18H16O5	312.32	23	11	0.33	0	5	2	82.22	87.74	2.14	1.19	2.04	0.33	3.46	1.83	-2.88	0.412	0.00132	Soluble	-2.63	0.735	0.00235	Soluble	-4.93	0.00365	1.17e-05	Moderately soluble	High	No	Yes	Yes	No	No	No	No	-7.36	0	0	0	0	0	0.55	2	1	0	4.34
GSK-604	O[C@@H]1CCc2c([C@@]1(C)O)ccc1c2C(=O)C(=O)c2c1occ2C	C18H16O5	312.32	23	11	0.33	0	5	2	82.22	87.74	2.06	1.19	2.04	0.33	3.46	1.82	-2.88	0.412	0.00132	Soluble	-2.63	0.735	0.00235	Soluble	-4.93	0.00365	1.17e-05	Moderately soluble	High	No	Yes	Yes	No	No	No	No	-7.36	0	0	0	0	0	0.55	2	1	0	4.34
GSK-605	Cc1cccc2c1ccc1c2c(=O)oc2c1occ2C	C17H12O3	264.28	20	17	0.12	0	3	0	79.69	43.35	2.9	4.12	4.31	3.13	4.87	3.86	-4.7	0.00524	1.98e-05	Moderately soluble	-4.74	0.00484	1.83e-05	Moderately soluble	-6.95	2.94e-05	1.11e-07	Poorly soluble	High	Yes	No	Yes	Yes	No	No	No	-4.99	0	0	0	0	0	0.55	0	1	1	3.31
GSK-606	O=C1c2c3CCCC(c3ccc2c2c(C1=O)c(C)co2)(C)C	C19H18O3	294.34	22	11	0.37	0	3	0	84.7	47.28	2.79	4.33	4.25	2.24	5.37	3.8	-4.76	0.00508	1.73e-05	Moderately soluble	-5.04	0.0027	9.18e-06	Moderately soluble	-6.71	5.77e-05	1.96e-07	Poorly soluble	High	Yes	Yes	Yes	Yes	Yes	Yes	Yes	-5.02	0	0	0	0	0	0.55	2	1	1	3.66
GSK-607	OC[C@@]1(C)CCCc2c1ccc1c2C(=O)C(=O)c2c1occ2C	C19H18O4	310.34	23	11	0.37	1	4	1	85.86	67.51	2.41	2.93	3.22	1.39	4.75	2.94	-3.9	0.0393	0.000126	Soluble	-4.01	0.0304	9.79e-05	Moderately soluble	-6.14	0.000223	7.19e-07	Poorly soluble	High	Yes	Yes	Yes	Yes	Yes	Yes	Yes	-6.11	0	0	0	0	0	0.55	2	1	0	4.13
GSK-608	OC[C@H](C1=C(O)c2c(C(=O)C1=O)c1cccc(c1cc2)C)C	C18H16O4	296.32	22	10	0.22	2	4	2	84.44	74.6	1.95	2.38	2.81	1.08	3.72	2.39	-3.38	0.123	0.000416	Soluble	-3.59	0.0766	0.000259	Soluble	-5	0.00297	1e-05	Moderately soluble	High	Yes	No	Yes	No	No	No	No	-6.42	0	0	0	0	0	0.85	2	1	0	3.6
GSK-609	Cc1coc2c1C(=O)C(=O)c1c2ccc2c1cccc2C	C18H12O3	276.29	21	15	0.11	0	3	0	80.24	47.28	2.44	3.69	4.1	1.82	4.95	3.4	-4.41	0.0108	3.92e-05	Moderately soluble	-4.37	0.0117	4.23e-05	Moderately soluble	-6.91	3.44e-05	1.24e-07	Poorly soluble	High	Yes	No	Yes	Yes	No	No	Yes	-5.37	0	0	0	0	0	0.55	2	1	1	3.28
GSK-610	C[C@@H]1CC[C@@]2(OC1)O[C@@H]1[C@H]([C@@H]2C)[C@@]2([C@@H](C1)[C@@H]1CC[C@@H]3[C@]([C@H]1CC2)(C)CC[C@@H](C3)O)C	C27H44O3	416.64	30	0	1	0	3	1	122.07	38.69	4.55	6.49	5.79	5.08	4.3	5.24	-6.51	0.000128	3.08e-07	Poorly soluble	-7.1	3.32e-05	7.97e-08	Poorly soluble	-4.51	0.0129	3.1e-05	Moderately soluble	High	Yes	No	No	No	No	No	No	-4.23	1	2	0	0	1	0.55	0	0	2	6.88
GSK-611	OC[C@@]12CC[C@H]([C@@H]([C@H]2C2=CC[C@H]3[C@@]([C@@]2(CC1)C)(C)CC[C@H]1[C@]3(C)CC[C@@H](C1(C)C)O)C)C	C30H50O2	442.72	32	0	0.93	1	2	2	136.3	40.46	4.29	7.42	7	6	5.91	6.12	-7.19	2.84e-05	6.41e-08	Poorly soluble	-8.1	3.51e-06	7.93e-09	Poorly soluble	-6.14	0.000319	7.21e-07	Poorly soluble	Low	No	No	No	No	No	No	No	-3.73	1	3	0	1	1	0.55	0	1	2	6.28
GSK-612	C=C1CC[C@H]2[C@@H](C1)[C@H](CC[C@]2(C)O)C(C)C	C15H26O	222.37	16	0	0.87	1	1	1	70.72	20.23	3.04	3.5	3.78	3.67	3.51	3.5	-3.36	0.0976	0.000439	Soluble	-3.61	0.0548	0.000247	Soluble	-2.98	0.232	0.00104	Soluble	High	Yes	No	No	Yes	No	No	No	-5.17	0	0	0	0	1	0.55	0	1	1	3.53
GSK-613	O=C(c1cc(O)c(c(c1)OC(=O)c1cc(O)c(c(c1)O)O)O)O[C@@H]1[C@@H](COC(=O)c2cc(O)c(c(c2)OC(=O)c2cc(O)c(c(c2)O)O)O)O[C@H]([C@@H]([C@H]1OC(=O)c1cc(O)c(c(c1)OC(=O)c1cc(O)c(c(c1)O)O)O)OC(=O)c1cc(O)c(c(c1)OC(=O)c1cc(O)c(c(c1)O)O)O)OC(=O)c1cc(O)c(c(c1)OC(=O)c1cc(O)c(c(c1)O)O)O	C76H52O46	1701.2	122	60	0.08	31	46	25	391.51	777.98	4.29	6.2	4.84	-3.98	-0.79	2.11	-12.61	4.16e-10	2.45e-13	Insoluble	-22.32	8.1e-20	4.76e-23	Insoluble	-5.59	0.00439	2.58e-06	Moderately soluble	Low	No	Yes	No	No	No	No	No	-12.28	3	3	2	1	7	0.17	1	3	3	10
GSK-614	CC(=O)O[C@H]1CC[C@]2(C(C1(C)C)CC[C@@]1([C@@H]2CC=C2[C@@]1(C)CC[C@@]1([C@@H]2CC(C)(C)CC1)C(=O)O)C)C	C32H50O4	498.74	36	0	0.88	3	4	1	146.39	63.6	4.36	8.06	7.8	6.06	6.36	6.53	-7.81	7.69e-06	1.54e-08	Poorly soluble	-9.25	2.8e-07	5.61e-10	Poorly soluble	-6.73	9.33e-05	1.87e-07	Poorly soluble	Low	No	No	No	No	Yes	No	No	-3.62	1	4	0	1	1	0.85	0	1	2	6.14
GSK-615	CC1COC2=C1C(=O)C(=O)c1c2ccc2c1cccc2C	C18H14O3	278.3	21	10	0.22	0	3	0	80.68	43.37	2.43	3.16	3.29	1.93	4.35	3.03	-3.91	0.0343	0.000123	Soluble	-3.74	0.0505	0.000182	Soluble	-5.76	0.00048	1.73e-06	Moderately soluble	High	Yes	No	Yes	Yes	Yes	Yes	Yes	-5.75	0	0	0	0	0	0.85	2	1	0	3.74
GSK-616	CC1COC2=C1C(=O)c1c(C2=O)c2cccc(c2cc1)C	C18H14O3	278.3	21	10	0.22	0	3	0	80.11	43.37	2.52	3.62	3.45	1.93	4.35	3.17	-4.2	0.0176	6.33e-05	Moderately soluble	-4.22	0.0168	6.05e-05	Moderately soluble	-5.76	0.00048	1.73e-06	Moderately soluble	High	Yes	No	Yes	Yes	Yes	Yes	Yes	-5.43	0	0	0	0	0	0.85	1	0	1	3.75
GSK-617	C[C@@H]1CC[C@]2([C@@H]([C@H]1C)C1=CC[C@H]3[C@@]([C@@]1(CC2)C)(C)CCC1[C@]3(C)C[C@@H](O)[C@H](C1(C)C)O)C(=O)O	C30H48O4	472.7	34	0	0.9	1	4	3	138.08	77.76	3.54	6.37	6.06	4.97	4.56	5.1	-6.72	9.05e-05	1.91e-07	Poorly soluble	-7.79	7.59e-06	1.61e-08	Poorly soluble	-4.85	0.00668	1.41e-05	Moderately soluble	High	No	Yes	No	No	No	No	No	-4.66	1	3	0	1	1	0.56	0	1	2	6.34
GSK-618	C[C@@H]1CC[C@]2([C@@H]([C@H]1C)C1=CC[C@H]3[C@@]([C@@]1(CC2)C)(C)CCC1[C@]3(C)C[C@@H](O)[C@@H](C1(C)C)O)C(=O)O	C30H48O4	472.7	34	0	0.9	1	4	3	138.08	77.76	3.6	6.37	6.06	4.97	4.56	5.11	-6.72	9.05e-05	1.91e-07	Poorly soluble	-7.79	7.59e-06	1.61e-08	Poorly soluble	-4.85	0.00668	1.41e-05	Moderately soluble	High	No	Yes	No	No	No	No	No	-4.66	1	3	0	1	1	0.56	0	1	2	6.34
GSK-619	Cc1cc(O)c2c(c1)C(=O)c1c(C2=O)cccc1O	C15H10O4	254.24	19	12	0.07	0	4	2	68.76	74.6	2.26	4.08	2.18	0.92	3.04	2.5	-4.45	0.00894	3.52e-05	Moderately soluble	-5.35	0.00113	4.45e-06	Moderately soluble	-4.49	0.00832	3.27e-05	Moderately soluble	High	Yes	No	Yes	No	Yes	No	Yes	-4.95	0	0	0	0	0	0.55	1	0	1	2.46
GSK-620	O[C@@H]1C[C@@]2(C)C(C([C@@H]1O)(C)C)CC[C@@]1([C@@H]2CC=C2[C@@]1(C)CC[C@@]1([C@H]2[C@](C)(O)[C@H](C)CC1)C(=O)O)C	C30H48O5	488.7	35	0	0.9	1	5	4	139.28	97.99	3.1	4.96	5.18	4.14	4.07	4.29	-5.93	0.000576	1.18e-06	Moderately soluble	-6.76	8.57e-05	1.75e-07	Poorly soluble	-4.48	0.0163	3.33e-05	Moderately soluble	High	No	Yes	No	No	No	No	No	-5.76	0	3	0	0	0	0.56	0	1	2	6.59
GSK-621	COC(=O)[C@@]12CC[C@H]([C@@]([C@H]2C2=CC[C@H]3[C@@]([C@@]2(CC1)C)(C)CCC1[C@]3(C)C[C@H]([C@@H](C1(C)C)OC(=O)C)O)(C)O)C	C33H52O6	544.76	39	0	0.88	4	6	2	153.33	93.06	3.93	5.86	5.83	4.61	5.15	5.08	-6.65	0.000123	2.26e-07	Poorly soluble	-7.59	1.41e-05	2.59e-08	Poorly soluble	-5.76	0.000936	1.72e-06	Moderately soluble	High	No	Yes	No	No	No	No	No	-5.46	2	4	0	0	1	0.17	0	2	2	6.83
GSK-622	OC[C@@]1(C)[C@H](O)[C@H](O)C[C@]2(C1CC[C@@]1([C@@H]2CC=C2[C@@]1(C)CC[C@@]1([C@H]2[C@@H](C)[C@@H](CC1)C)C(=O)O)C)C	C30H48O5	488.7	35	0	0.9	2	5	4	139.24	97.99	3.16	5.7	5.03	4.14	3.96	4.4	-6.33	0.000229	4.69e-07	Poorly soluble	-7.52	1.46e-05	2.99e-08	Poorly soluble	-4.28	0.0259	5.31e-05	Moderately soluble	High	No	Yes	No	No	No	No	No	-5.23	0	3	0	0	1	0.56	0	1	2	6.56
GSK-623	OCC1(O)CCCc2c1ccc1c2C(=O)C(=O)c2c1occ2C	C18H16O5	312.32	23	11	0.33	1	5	2	82.22	87.74	2.2	1.12	2.04	0.33	3.75	1.89	-2.77	0.531	0.0017	Soluble	-2.56	0.868	0.00278	Soluble	-5.18	0.00206	6.61e-06	Moderately soluble	High	No	Yes	Yes	No	No	No	No	-7.41	0	0	0	0	0	0.55	2	1	0	4.07
GSK-624	Cc1cccc2c1ccc1c2c(=O)oc2c1occ2C	C17H12O3	264.28	20	17	0.12	0	3	0	79.69	43.35	2.9	4.12	4.31	3.13	4.87	3.86	-4.7	0.00524	1.98e-05	Moderately soluble	-4.74	0.00484	1.83e-05	Moderately soluble	-6.95	2.94e-05	1.11e-07	Poorly soluble	High	Yes	No	Yes	Yes	No	No	No	-4.99	0	0	0	0	0	0.55	0	1	1	3.31
GSK-625	O=C(O[C@@H](C(=O)O)Cc1ccc(c(c1)O)O)/C=C/c1ccc(c2c1[C@@H](C(=O)O[C@@H](C(=O)O)Cc1ccc(c(c1)O)O)[C@@H](O2)c1ccc(c(c1)O)O)O	C36H30O16	718.61	52	24	0.17	14	16	9	178.07	278.04	0.49	3.98	2.9	0.25	2.57	2.04	-6.22	0.000433	6.02e-07	Poorly soluble	-9.52	2.17e-07	3.02e-10	Poorly soluble	-4.41	0.0282	3.93e-05	Moderately soluble	Low	No	No	No	No	No	No	No	-7.86	3	3	2	1	4	0.11	1	3	3	6
GSK-626	OC(=O)C1Cc2ccc(c3c2C(=Cc2ccc(c(c2O3)O)O)C1=O)O	C18H12O7	340.28	25	12	0.11	1	7	4	87.2	124.29	1.52	2.69	2.17	0.75	1.7	1.77	-3.93	0.0396	0.000117	Soluble	-4.95	0.00379	1.12e-05	Moderately soluble	-3.06	0.296	0.000869	Soluble	High	No	No	Yes	No	Yes	No	No	-6.47	0	0	0	0	0	0.56	1	3	0	3.89
GSK-627	Cc1coc2c1C(=O)C(=O)c1c2ccc2c1cccc2C	C18H12O3	276.29	21	15	0.11	0	3	0	80.24	47.28	2.44	3.69	4.1	1.82	4.95	3.4	-4.41	0.0108	3.92e-05	Moderately soluble	-4.37	0.0117	4.23e-05	Moderately soluble	-6.91	3.44e-05	1.24e-07	Poorly soluble	High	Yes	No	Yes	Yes	No	No	Yes	-5.37	0	0	0	0	0	0.55	2	1	1	3.28
GSK-628	O=C1c2c3CCCC(c3ccc2c2c(C1=O)c(C)co2)(C)C	C19H18O3	294.34	22	11	0.37	0	3	0	84.7	47.28	2.79	4.33	4.25	2.24	5.37	3.8	-4.76	0.00508	1.73e-05	Moderately soluble	-5.04	0.0027	9.18e-06	Moderately soluble	-6.71	5.77e-05	1.96e-07	Poorly soluble	High	Yes	Yes	Yes	Yes	Yes	Yes	Yes	-5.02	0	0	0	0	0	0.55	2	1	1	3.66
GSK-629	OC[C@@]1(C)CCCc2c1ccc1c2C(=O)C(=O)c2c1occ2C	C19H18O4	310.34	23	11	0.37	1	4	1	85.86	67.51	2.41	2.93	3.22	1.39	4.75	2.94	-3.9	0.0393	0.000126	Soluble	-4.01	0.0304	9.79e-05	Moderately soluble	-6.14	0.000223	7.19e-07	Poorly soluble	High	Yes	Yes	Yes	Yes	Yes	Yes	Yes	-6.11	0	0	0	0	0	0.55	2	1	0	4.13
GSK-630	OCC(C1=C(O)C(=O)c2c(C1=O)ccc1c2CCCC1(C)C)C	C19H22O4	314.38	23	6	0.47	2	4	2	88.33	74.6	2.72	3.47	3.12	1.51	4.15	2.99	-4.04	0.0289	9.2e-05	Moderately soluble	-4.72	0.00601	1.91e-05	Moderately soluble	-4.8	0.00499	1.59e-05	Moderately soluble	High	Yes	No	No	Yes	Yes	No	Yes	-5.75	0	0	0	0	0	0.85	1	0	0	3.86
GSK-631	OCC(C1=C(O)C(=O)c2c(C1=O)ccc1c2cccc1C)C	C18H16O4	296.32	22	10	0.22	2	4	2	83.87	74.6	2.3	2.83	2.97	1.08	3.72	2.58	-3.66	0.0642	0.000217	Soluble	-4.05	0.0261	8.82e-05	Moderately soluble	-5	0.00297	1e-05	Moderately soluble	High	Yes	No	Yes	No	Yes	No	No	-6.1	0	0	0	0	0	0.85	1	0	0	3.53
GSK-632	O=C1CCC(c2c1c1c(cc2)cc(c(c1O)O)C(C)C)(C)C	C19H22O3	298.38	22	10	0.42	1	3	2	89.92	57.53	3.14	4.56	4.63	2.86	4.69	3.97	-4.83	0.00438	1.47e-05	Moderately soluble	-5.49	0.000963	3.23e-06	Moderately soluble	-5.5	0.00095	3.18e-06	Moderately soluble	High	Yes	No	Yes	Yes	No	Yes	No	-4.88	0	0	0	0	0	0.55	2	1	1	2.48
GSK-633	CC(C1=Cc2ccc3c(c2C(=O)C1=O)CCCC3(C)C)C	C19H22O2	282.38	21	6	0.47	1	2	0	86.16	34.14	2.84	4.88	4	3.24	5.27	4.04	-4.81	0.00437	1.55e-05	Moderately soluble	-5.33	0.00131	4.65e-06	Moderately soluble	-5.73	0.000531	1.88e-06	Moderately soluble	High	Yes	No	No	No	Yes	No	No	-4.56	0	0	0	0	0	0.55	2	1	1	3.44
GSK-634	O=CC1(C)CCCc2c1ccc1c2C(=O)C(=O)c2c1occ2C	C19H16O4	308.33	23	11	0.32	1	4	0	84.9	64.35	2.35	2.81	3.43	1.31	5.05	2.99	-3.81	0.0478	0.000155	Soluble	-3.82	0.0468	0.000152	Soluble	-6.26	0.000168	5.46e-07	Poorly soluble	High	Yes	No	Yes	Yes	Yes	No	Yes	-6.19	0	0	0	0	0	0.55	2	2	0	4.06
GSK-635	O=C1c2c3CCCC(=O)c3ccc2c2c(C1=O)c(C)co2	C17H12O4	280.27	21	11	0.24	0	4	0	75.62	64.35	2.03	2.18	3.15	0.84	4.47	2.54	-3.34	0.128	0.000458	Soluble	-3.16	0.192	0.000684	Soluble	-5.84	0.000406	1.45e-06	Moderately soluble	High	Yes	No	Yes	Yes	No	No	Yes	-6.46	0	0	0	0	0	0.55	2	1	0	3.4
GSK-636	CC1COC2=C1C(=O)C(=O)c1c2ccc2c1CCC=C2C	C18H16O3	280.32	21	6	0.33	0	3	0	80.76	43.37	2.57	2.55	3.18	2.05	4.27	2.92	-3.4	0.113	0.000402	Soluble	-3.11	0.219	0.00078	Soluble	-4.95	0.00317	1.13e-05	Moderately soluble	High	Yes	No	Yes	Yes	Yes	No	Yes	-6.2	0	0	0	0	0	0.85	2	1	0	3.94
GSK-637	CC(C1=Cc2ccc3c(c2C(=O)C1=O)CCCC3=C)C	C18H18O2	266.33	20	6	0.33	1	2	0	81.79	34.14	2.7	3.86	3.73	2.93	5.05	3.65	-4.08	0.0222	8.34e-05	Moderately soluble	-4.27	0.0142	5.33e-05	Moderately soluble	-5.36	0.00118	4.42e-06	Moderately soluble	High	Yes	No	Yes	Yes	Yes	No	Yes	-5.18	0	0	0	0	0	0.55	2	1	1	3.3
GSK-638	O=C1c2c3CCCC(=C)c3ccc2c2c(C1=O)c(C)co2	C18H14O3	278.3	21	11	0.22	0	3	0	80.33	47.28	2.59	3.32	3.98	1.93	5.16	3.4	-4.04	0.0251	9.02e-05	Moderately soluble	-3.99	0.0285	0.000103	Soluble	-6.34	0.000128	4.6e-07	Poorly soluble	High	Yes	No	Yes	Yes	Yes	Yes	Yes	-5.64	0	0	0	0	0	0.55	2	1	0	3.5
GSK-639	O[C@H]1CC[C@]2(C(C1(C)C)CC[C@@]1([C@@H]2CC=C2[C@@]1(C)CC[C@@]1([C@@H]2CC(C)(C)CC1)C(=O)O)C)C	C30H48O3	456.7	33	0	0.9	1	3	2	136.65	57.53	3.95	7.49	7.23	5.82	5.85	6.07	-7.32	2.16e-05	4.74e-08	Poorly soluble	-8.53	1.34e-06	2.94e-09	Poorly soluble	-6.12	0.000345	7.55e-07	Poorly soluble	Low	No	No	No	No	No	No	No	-3.77	1	3	0	1	1	0.85	0	1	2	6.08
GSK-640	Cc1coc2c1C(=O)c1c(C2=O)c2cccc(c2cc1)C	C18H12O3	276.29	21	15	0.11	0	3	0	79.45	47.28	2.52	4.25	3.83	1.82	4.95	3.47	-4.76	0.00481	1.74e-05	Moderately soluble	-4.95	0.00307	1.11e-05	Moderately soluble	-6.91	3.44e-05	1.24e-07	Poorly soluble	High	Yes	No	Yes	Yes	Yes	No	No	-4.97	0	0	0	0	0	0.55	1	0	1	3.23
GSK-641	COc1ccc(cc1O)C=CC(=O)O	C10H10O4	194.18	14	6	0.1	3	4	2	51.63	66.76	1.79	1.51	1.39	1	1.26	1.39	-2.11	1.49	0.00768	Soluble	-2.52	0.586	0.00302	Soluble	-1.42	7.43	0.0383	Soluble	High	Yes	No	No	No	No	No	No	-6.41	0	0	0	0	1	0.85	0	1	1	1.9
GSK-642	CC(=CCOc1c2ccoc2cc2c1ccc(=O)o2)C	C16H14O4	270.28	20	13	0.19	3	4	0	77.5	52.58	3.07	3.43	3.88	2.14	3.99	3.3	-3.96	0.0297	0.00011	Soluble	-4.21	0.0165	6.1e-05	Moderately soluble	-5.51	0.000833	3.08e-06	Moderately soluble	High	Yes	No	Yes	Yes	Yes	No	No	-5.51	0	0	0	0	0	0.55	0	2	0	3.24
GSK-643	CC1COC2=C1C(=O)c1c(C2=O)c2CCCC(c2cc1)(C)C	C19H20O3	296.36	22	6	0.47	0	3	0	84.56	43.37	2.84	4.26	3.6	2.36	4.76	3.57	-4.56	0.00811	2.73e-05	Moderately soluble	-4.88	0.00388	1.31e-05	Moderately soluble	-5.57	0.000807	2.72e-06	Moderately soluble	High	Yes	No	Yes	Yes	Yes	No	Yes	-5.08	0	0	0	0	0	0.85	1	0	1	4.03
GSK-644	CC(c1cc2CC[C@@H]3[C@](c2cc1O)(C)CCCC3(C)C)C	C20H30O	286.45	21	6	0.7	1	1	1	91.64	20.23	3.62	6.71	5.55	4.92	5.5	5.26	-5.99	0.000294	1.03e-06	Moderately soluble	-6.94	3.3e-05	1.15e-07	Poorly soluble	-5.77	0.000491	1.71e-06	Moderately soluble	High	Yes	No	No	Yes	Yes	Yes	No	-3.28	1	0	0	0	2	0.55	0	0	1	3.33
GSK-645	O=C1C[C@H]2C(C)(C)CCC[C@@]2(c2c1cc(C(C)C)c(c2)O)C	C20H28O2	300.44	22	6	0.65	1	2	1	92.06	37.3	3.29	5.62	5.19	3.9	5.19	4.64	-5.38	0.00125	4.18e-06	Moderately soluble	-6.17	0.000205	6.82e-07	Poorly soluble	-5.65	0.000674	2.24e-06	Moderately soluble	High	Yes	No	No	Yes	Yes	No	No	-4.14	0	0	0	0	1	0.55	0	0	1	3.45
GSK-646	O=C(OC(C(=O)O)Cc1ccc(c(c1)O)O)C=Cc1ccc(c(c1)O)O	C18H16O8	360.31	26	12	0.11	7	8	5	91.4	144.52	1.17	2.36	1.65	0.9	1.5	1.52	-3.44	0.131	0.000363	Soluble	-5.04	0.00332	9.22e-06	Moderately soluble	-2.17	2.41	0.0067	Soluble	Low	No	No	No	No	No	No	No	-6.82	0	0	1	1	0	0.56	1	2	1	3.38
GSK-647	CC1COC2=C1C(=O)c1c(C2=O)c2C(=O)CCC(c2cc1)(C)C	C19H18O4	310.34	23	6	0.42	0	4	0	84.99	60.44	2.19	2.98	3.24	1.43	4.45	2.86	-3.83	0.0454	0.000146	Soluble	-3.91	0.0379	0.000122	Soluble	-5.45	0.00111	3.57e-06	Moderately soluble	High	Yes	Yes	Yes	Yes	Yes	No	Yes	-6.08	0	0	0	0	0	0.85	1	0	0	3.99
GSK-648	OC(=O)[C@H]1O[C@@H](Oc2cc3oc(cc(=O)c3c(c2O)O)c2ccccc2)[C@@H]([C@H]([C@@H]1O)O)O	C21H18O11	446.36	32	16	0.24	4	11	6	106.72	187.12	1.75	1.11	0.14	-1.63	-0.1	0.25	-3.41	0.173	0.000387	Soluble	-4.63	0.0104	2.33e-05	Moderately soluble	-2.22	2.67	0.00598	Soluble	Low	No	Yes	No	No	No	No	No	-8.23	2	0	1	1	3	0.11	1	1	1	5.09
GSK-649	O[C@@H]1CCc2c(C1(C)C)ccc1c2C(=O)C(=O)c2c1occ2C	C19H18O4	310.34	23	11	0.37	0	4	1	85.86	67.51	2.5	2.99	3.22	1.39	4.46	2.91	-4	0.0309	9.96e-05	Moderately soluble	-4.07	0.0263	8.48e-05	Moderately soluble	-5.89	0.000395	1.27e-06	Moderately soluble	High	Yes	Yes	Yes	Yes	Yes	Yes	Yes	-6.07	0	0	0	0	0	0.55	2	1	0	4.14
GSK-650	O[C@H]1C[C@H]2C(C)(C)CCC[C@@]2(C2=C1C=C(C(C)C)C(=O)C2=O)C	C20H28O3	316.43	23	0	0.7	1	3	1	92.01	54.37	2.81	3.78	3.61	2.76	4.1	3.41	-4.12	0.0242	7.63e-05	Moderately soluble	-4.62	0.00767	2.42e-05	Moderately soluble	-4.17	0.0213	6.75e-05	Moderately soluble	High	Yes	No	No	Yes	Yes	No	Yes	-5.55	0	0	0	0	0	0.55	2	2	1	5.2
GSK-651	C[C@H]1COC2=C1C(=O)C(=O)c1c2ccc2c1CCCC2(C)C	C19H20O3	296.36	22	6	0.47	0	3	0	85.13	43.37	2.81	3.8	3.44	2.36	4.76	3.43	-4.27	0.0158	5.33e-05	Moderately soluble	-4.41	0.0117	3.93e-05	Moderately soluble	-5.57	0.000807	2.72e-06	Moderately soluble	High	Yes	Yes	Yes	Yes	Yes	No	Yes	-5.41	0	0	0	0	0	0.85	2	1	1	4.11
GSK-652	C[C@@H]1CC[C@@]2(OC1)O[C@@H]1[C@H]([C@@H]2C)[C@@]2([C@@H](C1)[C@@H]1CC[C@@H]3[C@]([C@H]1CC2)(C)CC[C@@H](C3)O)C	C27H44O3	416.64	30	0	1	0	3	1	122.07	38.69	4.55	6.49	5.79	5.08	4.3	5.24	-6.51	0.000128	3.08e-07	Poorly soluble	-7.1	3.32e-05	7.97e-08	Poorly soluble	-4.51	0.0129	3.1e-05	Moderately soluble	High	Yes	No	No	No	No	No	No	-4.23	1	2	0	0	1	0.55	0	0	2	6.88
GSK-653	CC(=O)c1cc2ccc3c(c2cc1O)CCCC3(C)C	C18H20O2	268.35	20	10	0.39	1	2	1	83.09	37.3	3.03	5.3	4.36	3.23	4.82	4.15	-5.15	0.00191	7.13e-06	Moderately soluble	-5.83	0.000393	1.46e-06	Moderately soluble	-5.71	0.000527	1.96e-06	Moderately soluble	High	Yes	No	Yes	Yes	Yes	Yes	No	-4.17	0	0	0	0	1	0.55	0	0	1	2.04
GSK-654	C[C@@H]1CC[C@]2([C@@H]([C@H]1C)C1=CC[C@H]3[C@@]([C@@]1(CC2)C)(C)CCC1[C@]3(C)CC[C@@H](C1(C)C)O)C(=O)O	C30H48O3	456.7	33	0	0.9	1	3	2	136.91	57.53	3.95	7.34	7.09	5.82	5.46	5.93	-7.23	2.69e-05	5.89e-08	Poorly soluble	-8.38	1.92e-06	4.21e-09	Poorly soluble	-5.67	0.000972	2.13e-06	Moderately soluble	Low	No	No	No	No	No	No	No	-3.87	1	3	0	1	1	0.85	0	1	2	6.21
GSK-655	O=Cc1cccc2c1ccc1c2C(=O)C(=O)c2c1occ2C	C18H10O4	290.27	22	15	0.06	1	4	0	80.66	64.35	1.91	2.79	3.6	0.9	4.64	2.77	-3.84	0.0424	0.000146	Soluble	-3.8	0.0462	0.000159	Soluble	-6.46	0.0001	3.45e-07	Poorly soluble	High	Yes	No	Yes	Yes	Yes	No	Yes	-6.09	0	0	0	0	0	0.55	2	2	0	3.25
GSK-656	O[C@H]1CCc2c([C@@]1(C)O)ccc1c2C(=O)C(=O)c2c1occ2C	C18H16O5	312.32	23	11	0.33	0	5	2	82.22	87.74	2.14	1.19	2.04	0.33	3.46	1.83	-2.88	0.412	0.00132	Soluble	-2.63	0.735	0.00235	Soluble	-4.93	0.00365	1.17e-05	Moderately soluble	High	No	Yes	Yes	No	No	No	No	-7.36	0	0	0	0	0	0.55	2	1	0	4.34
GSK-657	O[C@H]1CCc2c([C@@]1(C)O)ccc1c2C(=O)C(=O)c2c1occ2C	C18H16O5	312.32	23	11	0.33	0	5	2	82.22	87.74	2.14	1.19	2.04	0.33	3.46	1.83	-2.88	0.412	0.00132	Soluble	-2.63	0.735	0.00235	Soluble	-4.93	0.00365	1.17e-05	Moderately soluble	High	No	Yes	Yes	No	No	No	No	-7.36	0	0	0	0	0	0.55	2	1	0	4.34
GSK-658	C[C@H]1COC2=C1C(=O)C(=C1C2=CC(=O)C2=C1CCCC2(C)C)O	C19H20O4	312.36	23	0	0.47	0	4	1	85.89	63.6	2.76	2.15	3.32	1.51	3.46	2.64	-3.13	0.231	0.000739	Soluble	-3.12	0.238	0.000762	Soluble	-3.82	0.0468	0.00015	Soluble	High	Yes	Yes	No	Yes	Yes	No	No	-6.68	0	0	0	0	0	0.85	0	0	0	4.59
GSK-659	O=C1C(=O)c2c(C)coc2c2c1ccc1c2cccc1C	C18H12O3	276.29	21	15	0.11	0	3	0	80.24	47.28	2.44	3.69	4.1	1.82	4.95	3.4	-4.41	0.0108	3.92e-05	Moderately soluble	-4.37	0.0117	4.23e-05	Moderately soluble	-6.91	3.44e-05	1.24e-07	Poorly soluble	High	Yes	No	Yes	Yes	No	No	Yes	-5.37	0	0	0	0	0	0.55	2	1	1	3.34
GSK-660	OCC1(C)CCCc2c1ccc1c2C(=O)c2c(C1=O)c(co2)C	C19H18O4	310.34	23	11	0.37	1	4	1	85.07	67.51	2.55	3.48	2.95	1.39	4.75	3.02	-4.24	0.0177	5.7e-05	Moderately soluble	-4.58	0.00816	2.63e-05	Moderately soluble	-6.14	0.000223	7.19e-07	Poorly soluble	High	Yes	Yes	Yes	Yes	Yes	Yes	Yes	-5.72	0	0	0	0	0	0.55	1	0	0	3.92
GSK-661	C[C@H]1CO[C@@]2(C1)OC(=O)c1c2ccc2c1cccc2C	C17H16O3	268.31	20	10	0.35	0	3	0	76.32	35.53	2.8	3.69	3.42	3.6	4.06	3.51	-4.2	0.017	6.34e-05	Moderately soluble	-4.13	0.0201	7.47e-05	Moderately soluble	-5.36	0.00118	4.4e-06	Moderately soluble	High	Yes	Yes	No	Yes	Yes	No	No	-5.32	0	0	0	0	0	0.55	0	0	1	3.95
GSK-662	Cc1cc([O])cc(c1)O	C7H7O2	123.13	9	6	0.14	0	2	1	33.56	20.23	-5.31	1.58	1.84	1.15	1.35	0.12	-2.09	0.996	0.00809	Soluble	-1.62	2.98	0.0242	Very soluble	-1.59	3.16	0.0257	Soluble	High	Yes	Yes	No	No	No	No	No	-5.93	0	3	0	0	1	0.55	0	0	1	1
GSK-663	O=Cc1c(O)cc(c2c1Oc1c(OC2=O)c(COC(=O)/C=C/C(=O)O)c(c(c1C)C(=O)O)O)C	C22H16O12	472.36	34	12	0.14	7	12	4	111.02	193.96	1.47	2.5	2.08	0.29	2.52	1.77	-4.14	0.034	7.2e-05	Moderately soluble	-6.22	0.000286	6.04e-07	Poorly soluble	-2.91	0.576	0.00122	Soluble	Low	No	No	Yes	No	No	No	No	-7.41	1	0	1	1	2	0.11	0	3	1	3.87
GSK-664	OC[C@H]([C@H]([C@@H]([C@@H](C=O)O)O)O)O	C6H12O6	180.16	12	0	0.83	5	6	5	36.96	118.22	-0.88	-2.94	-3.38	-2.91	-1.6	-2.34	1.23	3030	16.8	Highly soluble	1.02	1870	10.4	Highly soluble	2.45	50500	281	Soluble	Low	No	No	No	No	No	No	No	-9.49	0	2	0	0	2	0.55	0	1	1	3.31
GSK-665	Oc1cc(C)c(c(c1)O)C(=O)Oc1cc(C)c(c(c1)O)C(=O)O	C16H14O7	318.28	23	12	0.12	4	7	4	80.8	124.29	1.84	3.63	2.34	1.55	1.92	2.26	-4.22	0.0191	5.99e-05	Moderately soluble	-5.93	0.000376	1.18e-06	Moderately soluble	-3.01	0.313	0.000984	Soluble	High	No	No	No	No	No	No	No	-5.66	0	0	0	0	0	0.56	0	1	1	2.5
GSK-666	O[C@H]1CC[C@]2(C(=CC=C3[C@@H]2CC[C@]2([C@H]3CC[C@@H]2[C@@H](/C=C/[C@@H](C(C)C)C)C)C)C1)C	C28H44O	396.65	29	0	0.79	4	1	1	127.47	20.23	4.81	7.43	7.33	6.33	6.44	6.47	-6.72	7.63e-05	1.92e-07	Poorly soluble	-7.69	8.17e-06	2.06e-08	Poorly soluble	-5.06	0.00345	8.69e-06	Moderately soluble	Low	No	No	No	No	Yes	No	No	-3.44	1	2	0	1	2	0.55	0	1	2	6.58
GSK-667	Oc1cc(C)c(c(c1)O)C(=O)O	C8H8O4	168.15	12	6	0.12	1	4	3	42.41	77.76	0.65	1.65	1.1	0.74	0.72	0.97	-2.23	0.999	0.00594	Soluble	-2.9	0.213	0.00127	Soluble	-1	16.7	0.0995	Soluble	High	No	No	No	No	No	No	No	-6.15	0	0	0	0	1	0.56	0	0	1	1.25
GSK-668	COC(=O)c1c(C)cc(c(c1O)C)OC(=O)c1c(C)cc(c(c1O)C=O)O	C19H18O8	374.34	27	12	0.21	6	8	3	95.48	130.36	2.12	4.33	2.55	1.4	3.23	2.73	-4.82	0.00564	1.51e-05	Moderately soluble	-6.78	6.18e-05	1.65e-07	Poorly soluble	-4.01	0.0367	9.79e-05	Moderately soluble	High	No	No	No	No	No	No	No	-5.51	0	0	0	0	0	0.55	0	2	2	2.93
GSK-669	OC/C=C(\C=C\C=C(/C=C/C1=C(C)CCCC1(C)C)\C)/C	C20H30O	286.45	21	0	0.5	5	1	1	94.67	20.23	4.01	5.68	5.51	4.48	5.64	5.06	-4.86	0.00391	1.37e-05	Moderately soluble	-5.87	0.000386	1.35e-06	Moderately soluble	-3.63	0.0676	0.000236	Soluble	High	Yes	No	Yes	No	Yes	No	No	-4.01	1	0	0	0	2	0.55	0	1	1	4.28
GSK-670	OCCc1sc[n+](c1C)Cc1cnc(nc1N)C	C12H17N4OS	265.35	18	11	0.42	4	3	2	73.26	104.15	-1.6	1.02	0.62	-0.36	2.54	0.44	-2.32	1.28	0.00483	Soluble	-2.8	0.424	0.0016	Soluble	-3.3	0.132	0.000499	Soluble	High	No	Yes	No	No	No	No	No	-7.19	0	0	0	0	0	0.55	0	1	0	2.99
GSK-671	Cc1oc2cc3c(c(O)cc(c3c(c2c(=O)c1)O)O)c1c(O)cc(c2c1cc1oc(C)cc(=O)c1c2O)O	C28H18O10	514.44	38	28	0.07	1	10	6	141.04	181.8	3.65	5.01	4.72	-0.07	4.6	3.58	-6.67	0.000111	2.16e-07	Poorly soluble	-8.57	1.39e-06	2.7e-09	Poorly soluble	-7.82	7.71e-06	1.5e-08	Poorly soluble	Low	No	No	No	No	Yes	No	No	-5.88	2	2	1	1	3	0.17	0	1	2	3.88
GSK-672	OCc1c2OC(=O)c3c(Oc2c2c(c1O)C(=O)OC2O)c(C=O)c(cc3C)O	C18H12O10	388.28	28	12	0.17	2	10	4	88.93	159.82	1.74	1.15	0.72	0.17	1.75	1.11	-3.16	0.27	0.000697	Soluble	-4.1	0.0308	7.93e-05	Moderately soluble	-2.88	0.513	0.00132	Soluble	Low	No	Yes	No	No	No	No	No	-7.85	0	0	1	1	1	0.55	0	2	1	3.95

## Sheet: XLGB
Molecule	Canonical SMILES	Formula	MW	#Heavy atoms	#Aromatic heavy atoms	Fraction Csp3	#Rotatable bonds	#H-bond acceptors	#H-bond donors	MR	TPSA	iLOGP	XLOGP3	WLOGP	MLOGP	Silicos-IT Log P	Consensus Log P	ESOL Log S	ESOL Solubility (mg/ml)	ESOL Solubility (mol/l)	ESOL Class	Ali Log S	Ali Solubility (mg/ml)	Ali Solubility (mol/l)	Ali Class	Silicos-IT LogSw	Silicos-IT Solubility (mg/ml)	Silicos-IT Solubility (mol/l)	Silicos-IT class	GI absorption	BBB permeant	Pgp substrate	CYP1A2 inhibitor	CYP2C19 inhibitor	CYP2C9 inhibitor	CYP2D6 inhibitor	CYP3A4 inhibitor	log Kp (cm/s)	Lipinski #violations	Ghose #violations	Veber #violations	Egan #violations	Muegge #violations	Bioavailability Score	PAINS #alerts	Brenk #alerts	Leadlikeness #violations	Synthetic Accessibility
XLGB-1	CCCCCCCCCCCCCCCCCCCCCCCCCCCCC	C29H60	408.79	29	0	1	26	0	0	141.52	0	7.79	15.32	11.56	9.25	11.97	11.18	-10.31	2e-08	4.9e-11	Insoluble	-15.45	1.45e-13	3.56e-16	Insoluble	-11.5	1.3e-09	3.18e-12	Insoluble	Low	No	Yes	No	No	No	No	No	2.08	1	3	1	1	3	0.55	0	0	3	3.81
XLGB-2	CCCCCCCCCCCCCCCCCCCCCCCCCCO	C26H54O	382.71	27	0	1	24	1	1	128.26	20.23	6.68	12.53	9.36	6.67	10.07	9.06	-8.52	1.15e-06	3e-09	Poorly soluble	-12.98	4.02e-11	1.05e-13	Insoluble	-9.75	6.84e-08	1.79e-10	Poorly soluble	Low	No	No	No	No	No	No	No	0.26	1	2	1	1	3	0.55	0	0	3	3.47
XLGB-3	OCCCc1cc2c(c(c1)OC)O[C@H]([C@H]2CO)c1ccc(c(c1)OC)O	C20H24O6	360.4	26	12	0.4	7	6	3	96.99	88.38	2.98	2.08	2.22	1.17	3.33	2.35	-3.26	0.196	0.000544	Soluble	-3.57	0.098	0.000272	Soluble	-4.85	0.00511	1.42e-05	Moderately soluble	High	No	Yes	No	No	No	Yes	No	-7.02	0	0	0	0	0	0.55	0	0	1	4
XLGB-4	CCCCCCCCCCCCCCCCCCCCCCCCCCCCCCC	C31H64	436.84	31	0	1	28	0	0	151.13	0	8.25	16.41	12.34	9.64	12.86	11.9	-11.04	4e-09	9.15e-12	Insoluble	-16.58	1.15e-14	2.63e-17	Insoluble	-12.28	2.29e-10	5.24e-13	Insoluble	Low	No	Yes	No	No	No	No	No	2.69	1	3	1	1	3	0.55	0	0	3	4.06
XLGB-5	CCCCCCCCCCCCCCCCCCCCCCCCCCCCCC	C30H62	422.81	30	0	1	27	0	0	146.32	0	7.86	15.87	11.95	9.44	12.41	11.51	-10.68	8.88e-09	2.1e-11	Insoluble	-16.02	4.04e-14	9.56e-17	Insoluble	-11.89	5.46e-10	1.29e-12	Insoluble	Low	No	Yes	No	No	No	No	No	2.39	1	3	1	1	3	0.55	0	0	3	3.94
XLGB-6	Oc1cc(O)c2c(c1)oc(c(c2=O)O)c1ccc(c(c1)O)O	C15H10O7	302.24	22	16	0	1	7	5	78.04	131.36	1.63	1.54	1.99	-0.56	1.54	1.23	-3.16	0.211	0.000698	Soluble	-3.91	0.0374	0.000124	Soluble	-3.24	0.173	0.000573	Soluble	High	No	No	Yes	No	No	Yes	Yes	-7.05	0	0	0	0	0	0.55	1	1	0	3.23
XLGB-7	COc1cc(cc(c1O)OC)c1cc(=O)c2c(o1)cc(cc2O)O	C17H14O7	330.29	24	16	0.12	3	7	3	86.97	109.36	2.58	3.07	2.59	-0.07	2.59	2.15	-4.12	0.0252	7.63e-05	Moderately soluble	-5.03	0.00306	9.26e-06	Moderately soluble	-4.63	0.00771	2.33e-05	Moderately soluble	High	No	No	Yes	No	Yes	Yes	Yes	-6.14	0	0	0	0	0	0.55	0	0	0	3.21
XLGB-8	OCC(C(c1ccc(c(c1)OC)O)O)c1ccc(c(c1)OC)O	C17H20O6	320.34	23	12	0.29	6	6	4	84.86	99.38	2.51	1.37	1.6	0.86	2.15	1.7	-2.68	0.67	0.00209	Soluble	-3.06	0.279	0.000871	Soluble	-3.35	0.143	0.000446	Soluble	High	No	No	No	No	No	No	Yes	-7.28	0	0	0	0	0	0.55	0	0	0	3.14
XLGB-9	OC[C@H]1O[C@@H](OC(CCC2C(=CC(=O)CC2(C)C)C)C)[C@@H]([C@H]([C@@H]1O)O)O	C19H32O7	372.45	26	0	0.84	6	7	4	95.5	116.45	2.9	0.3	0.53	-0.17	1.11	0.93	-1.94	4.25	0.0114	Very soluble	-2.31	1.83	0.00492	Soluble	-1.12	28.4	0.0762	Soluble	High	No	Yes	No	No	No	No	No	-8.36	0	0	0	0	0	0.55	0	0	1	5.61
XLGB-10	CCCCC/C=C\C/C=C\CCCCCCCC(=O)O	C18H32O2	280.45	20	0	0.72	14	2	1	89.46	37.3	4.14	6.98	5.88	4.47	5.77	5.45	-5.05	0.00249	8.87e-06	Moderately soluble	-7.58	7.42e-06	2.64e-08	Poorly soluble	-4.67	0.00593	2.11e-05	Moderately soluble	High	Yes	No	Yes	No	Yes	No	No	-3.05	1	1	1	1	1	0.85	0	1	2	3.1
XLGB-11	OC[C@H]1O[C@@H](Oc2cc3oc(cc(=O)c3cc2CC=C(C)C)c2cc(O)c(c(c2)O)OC)[C@@H]([C@H]([C@@H]1O)O)O	C27H30O11	530.52	38	16	0.37	7	11	6	136.32	179.28	2.91	2.21	1.57	-0.92	2.23	1.6	-4.37	0.0226	4.25e-05	Moderately soluble	-5.61	0.0013	2.46e-06	Moderately soluble	-3.98	0.0552	0.000104	Soluble	Low	No	Yes	No	No	No	No	No	-7.97	3	2	1	1	3	0.17	0	1	1	5.8
XLGB-12	CC[C@@H](C(C)C)CC[C@H]([C@H]1CC[C@@H]2[C@]1(C)CC[C@H]1[C@H]2CC=C2[C@]1(C)CC[C@@H](C2)O)C	C29H50O	414.71	30	0	0.93	6	1	1	133.23	20.23	5.05	9.34	8.02	6.73	7.04	7.24	-7.9	5.23e-06	1.26e-08	Poorly soluble	-9.67	8.9e-08	2.15e-10	Poorly soluble	-6.19	0.000269	6.49e-07	Poorly soluble	Low	No	No	No	No	No	No	No	-2.2	1	3	0	1	2	0.55	0	1	2	6.3
XLGB-13	OC[C@H]1O[C@@H](Oc2c(oc3c(c2=O)c(O)cc(c3)O)c2ccc(c(c2)O)O)[C@@H]([C@H]([C@H]1O)O)O	C21H20O12	464.38	33	16	0.29	4	12	8	110.16	210.51	1.45	0.36	-0.54	-2.59	-0.59	-0.38	-3.04	0.423	0.00091	Soluble	-4.35	0.021	4.51e-05	Moderately soluble	-1.51	14.3	0.0308	Soluble	Low	No	No	No	No	No	No	No	-8.88	2	1	1	1	3	0.17	1	1	1	5.32
XLGB-14	COc1ccc(cc1)c1oc2c(CC=C(C)C)c(O)cc(c2c(=O)c1O[C@@H]1O[C@@H](C)[C@@H]([C@H]([C@H]1O)O)O)O	C27H30O10	514.52	37	16	0.37	6	10	5	135.16	159.05	3.56	3.47	2.59	-0.16	2.83	2.46	-5.14	0.00373	7.24e-06	Moderately soluble	-6.49	0.000166	3.22e-07	Poorly soluble	-4.56	0.0142	2.76e-05	Moderately soluble	Low	No	Yes	No	No	No	No	Yes	-6.97	1	2	1	1	1	0.55	0	1	1	5.93
XLGB-15	COc1cc(cc(c1O)OC)c1cc(=O)c2c(o1)c(CC=C(C)C)c(cc2O)O	C22H22O7	398.41	29	16	0.23	5	7	3	110.69	109.36	3.15	4.54	4.1	1	4.36	3.43	-5.25	0.00225	5.64e-06	Moderately soluble	-6.56	0.00011	2.76e-07	Poorly soluble	-5.85	0.00056	1.41e-06	Moderately soluble	High	No	No	No	No	Yes	No	No	-5.51	0	0	0	0	0	0.55	0	1	2	3.85
XLGB-16	OC[C@@H]1O[C@@H](Oc2c(oc3c(c2=O)c(O)cc(c3CC=C(C)C)O[C@@H]2O[C@H](CO)[C@H]([C@@H]([C@H]2O)O)O)c2ccc(cc2)O)[C@@H]([C@@H]([C@H]1O[C@@H]1O[C@H](C)[C@H]([C@@H]([C@H]1O)O)O)O)O	C38H48O20	824.78	58	16	0.55	11	20	12	195.2	328.35	3.62	-0.81	-2.41	-4.67	-1.87	-1.23	-3.92	0.0988	0.00012	Soluble	-5.61	0.00204	2.48e-06	Moderately soluble	-0.2	514	0.624	Soluble	Low	No	Yes	No	No	No	No	No	-11.91	3	4	2	1	4	0.17	0	1	2	8.26
XLGB-17	O[C@H]1CC[C@]2(C(=C[CH][C@@H]3[C@@H]2CC[C@]2([C@H]3[CH]C[C@@H]2[C@@H](CC[C@H](C([CH2])C)C)C)C)C1)[CH2]	C28H44O	396.65	29	0	0.93	5	1	1	124.19	20.23	0	8.8	6.89	6.54	6.63	5.77	-7.51	1.22e-05	3.07e-08	Poorly soluble	-9.11	3.09e-07	7.8e-10	Poorly soluble	-5.79	0.000636	1.6e-06	Moderately soluble	Low	No	Yes	No	No	Yes	No	No	-2.47	1	2	0	1	2	0.55	0	1	2	6.07
XLGB-18	OC[C@H]1O[C@@H](Oc2cc3CCc4c(c3cc2OC)c(OC)c(c(c4)OC)OC)[C@@H]([C@H]([C@@H]1O)O)O	C24H30O10	478.49	34	12	0.5	7	10	4	119.81	136.3	3.35	1.57	0.67	-0.43	1.76	1.38	-3.59	0.122	0.000254	Soluble	-4.04	0.0434	9.06e-05	Moderately soluble	-3.64	0.109	0.000227	Soluble	High	No	Yes	No	No	No	No	No	-8.1	0	0	0	1	0	0.55	0	0	1	5.48
XLGB-19	OC[C@H]1O[C@@H](Oc2cc(O)c3c(c2CC=C(C)C)oc(c(c3=O)O)c2ccc(cc2)OC)[C@@H]([C@H]([C@@H]1O)O)O	C27H30O11	530.52	38	16	0.37	7	11	6	136.32	179.28	3.68	2.97	1.57	-0.92	2.23	1.91	-4.85	0.0075	1.41e-05	Moderately soluble	-6.4	0.000212	4e-07	Poorly soluble	-3.98	0.0552	0.000104	Soluble	Low	No	Yes	No	No	No	No	No	-7.43	3	2	1	1	3	0.17	0	1	1	5.97
XLGB-20	COc1ccc(cc1)c1oc2c(CC=C(C)C)c(O[C@@H]3O[C@H](CO)[C@H]([C@@H]([C@H]3O)O)O)cc(c2c(=O)c1O[C@@H]1O[C@@H](C)[C@@H]([C@H]([C@H]1O)O)O)O	C33H40O15	676.66	48	16	0.48	9	15	8	167.28	238.2	2.98	1.66	0.07	-2.35	0.77	0.63	-4.73	0.0125	1.85e-05	Moderately soluble	-6.28	0.000358	5.3e-07	Poorly soluble	-2.74	1.23	0.00181	Soluble	Low	No	Yes	No	No	No	No	No	-9.25	3	3	1	1	4	0.17	0	1	2	7.24
XLGB-21	OC[C@H]1O[C@@H](Oc2cc(O)c3c(c2CC=C(C)C)oc(c(c3=O)O[C@@H]2O[C@@H](C)[C@@H]([C@H]([C@H]2O)O)O)c2ccc(cc2)O)[C@@H]([C@H]([C@@H]1O)O)O	C32H38O15	662.64	47	16	0.47	8	15	9	162.81	249.2	2.69	1.34	-0.24	-2.53	0.2	0.29	-4.52	0.0202	3.04e-05	Moderately soluble	-6.17	0.000443	6.68e-07	Poorly soluble	-2.06	5.78	0.00873	Soluble	Low	No	Yes	No	No	No	No	No	-9.39	3	3	1	1	4	0.17	0	1	2	7.11
XLGB-22	Oc1ccc(cc1)c1oc2cc(O[C@@H]3O[C@@H](C)[C@@H]([C@H]([C@H]3O)O)O)cc(c2c(=O)c1O[C@@H]1O[C@@H](C)[C@@H]([C@H]([C@H]1O[C@@H]1OC[C@H]([C@@H]([C@H]1O)O)O)O)O)O	C32H38O18	710.63	50	16	0.53	7	18	10	164.35	287.89	2.18	-1.62	-2.25	-4.24	-2.68	-1.72	-3	0.71	0.001	Soluble	-3.92	0.0863	0.000121	Soluble	-0.07	599	0.843	Soluble	Low	No	Yes	No	No	No	No	No	-11.79	3	4	1	1	4	0.17	0	0	1	7.4
XLGB-23	OC[C@@H]1O[C@@H](Oc2c(oc3c(c2=O)c(O)cc(c3CC=C(C)C)O)c2ccc(cc2)OC)[C@@H]([C@@H]([C@H]1O[C@@H]1O[C@H](C)[C@H]([C@@H]([C@H]1O)O)O)O)O	C33H40O15	676.66	48	16	0.48	9	15	8	167.54	238.2	2.65	1.32	0.42	-2.35	0.77	0.56	-4.52	0.0205	3.02e-05	Moderately soluble	-5.92	0.000808	1.19e-06	Moderately soluble	-2.74	1.23	0.00181	Soluble	Low	No	Yes	No	No	No	No	No	-9.49	3	3	1	1	4	0.17	0	1	2	7.2
XLGB-24	OC[C@H]1O[C@@H](O[C@H]2CC(=C(C(C2)(C)C)CCC(=O)C)C)[C@@H]([C@H]([C@@H]1O)O)O	C19H32O7	372.45	26	0	0.84	6	7	4	95.5	116.45	2.45	-0.22	0.68	-0.17	1.24	0.79	-1.61	9.05	0.0243	Very soluble	-1.77	6.35	0.017	Very soluble	-1.35	16.7	0.0448	Soluble	High	No	Yes	No	No	No	No	No	-8.73	0	0	0	0	0	0.55	0	1	1	5.66
XLGB-25	OC[C@H]1O[C@@H](O[C@@H]2CCC(=C(C2(C)C)CCC(=O)C)C)[C@@H]([C@H]([C@@H]1O)O)O	C19H32O7	372.45	26	0	0.84	6	7	4	95.5	116.45	3.04	-0.22	0.68	-0.17	1.24	0.91	-1.61	9.05	0.0243	Very soluble	-1.77	6.35	0.017	Very soluble	-1.35	16.7	0.0448	Soluble	High	No	Yes	No	No	No	No	No	-8.73	0	0	0	0	0	0.55	0	1	1	5.66
XLGB-26	COc1ccc(cc1)C(=O)CO[C@@H]1O[C@@H](C)[C@@H]([C@H]([C@H]1O)O)O	C15H20O7	312.32	22	6	0.53	5	7	3	75.51	105.45	1.84	-0.17	-0.28	-1.05	0.2	0.11	-1.54	8.99	0.0288	Very soluble	-1.59	8.04	0.0257	Very soluble	-1.24	17.9	0.0574	Soluble	High	No	No	No	No	No	No	No	-8.33	0	0	0	0	0	0.55	0	0	0	4.22
XLGB-27	OC[C@H]1O[C@@H](Oc2c(OC)cc(cc2OC)[C@H]2OC[C@H]3[C@@H]2CO[C@@H]3c2cc(OC)c(c(c2)OC)OC)[C@@H]([C@H]([C@@H]1O)O)O	C29H38O13	594.6	42	12	0.59	10	13	4	144.48	163.99	3.77	0.75	0.33	-1.42	1.25	0.94	-3.55	0.167	0.000282	Soluble	-3.77	0.1	0.000169	Soluble	-3.3	0.299	0.000502	Soluble	Low	No	Yes	No	No	No	No	No	-9.39	2	3	1	1	2	0.17	0	0	2	6.19
XLGB-28	OC[C@@H]1[C@H](O[C@@H]([C@H]1CO)c1cc(OC)c(c(c1)OC)O)c1cc(OC)c(c(c1)OC)O	C22H28O9	436.45	31	12	0.45	8	9	4	111.24	127.07	2.89	1.23	1.51	-0.22	2.13	1.51	-3.08	0.364	0.000833	Soluble	-3.5	0.139	0.000319	Soluble	-3.75	0.0774	0.000177	Soluble	High	No	Yes	No	No	No	No	No	-8.09	0	0	0	0	0	0.55	0	0	2	4.5
XLGB-29	COc1ccc(cc1)c1oc2c(CC=C(C)C)c(O)cc(c2c(=O)c1O[C@@H]1O[C@@H](C)[C@@H]([C@H]([C@H]1O[C@@H]1OC[C@H]([C@@H]([C@H]1O)O)O)O)O)O	C32H38O14	646.64	46	16	0.47	8	14	7	161.58	217.97	3.7	1.94	1.06	-1.8	1.23	1.23	-4.8	0.0102	1.58e-05	Moderately soluble	-6.14	0.000467	7.22e-07	Poorly soluble	-3.19	0.421	0.000652	Soluble	Low	No	Yes	No	No	No	No	No	-8.87	3	3	1	1	4	0.17	0	1	2	6.98
XLGB-30	OC[C@@H]1O[C@@H](Oc2c(oc3c(c2=O)c(O)cc(c3CC=C(C)C)O)c2ccc(cc2)OC)[C@@H]([C@@H]([C@H]1O)OC(=O)C)O[C@@H]1O[C@H](C)[C@H]([C@@H]([C@H]1O)O)O	C35H42O16	718.7	51	16	0.49	11	16	7	177.28	244.27	2.97	2.45	0.99	-1.98	1.3	1.15	-5.35	0.00324	4.51e-06	Moderately soluble	-7.22	4.3e-05	5.98e-08	Poorly soluble	-3.33	0.335	0.000467	Soluble	Low	No	Yes	No	No	No	No	No	-8.94	3	3	2	1	4	0.17	0	1	2	7.39
XLGB-31	Oc1ccc(cc1)c1oc2cc(O[C@@H]3O[C@@H](C)[C@@H]([C@H]([C@H]3O)O)O)cc(c2c(=O)c1O[C@@H]1O[C@@H](C)[C@@H]([C@H]([C@H]1O)O[C@@H]1OC[C@H]([C@@H]([C@H]1O)O)O)OC(=O)C)O	C34H40O19	752.67	53	16	0.53	9	19	9	174.08	293.96	2.82	-1.04	-1.68	-3.85	-2.15	-1.18	-3.48	0.249	0.000331	Soluble	-4.65	0.017	2.26e-05	Moderately soluble	-0.66	164	0.218	Soluble	Low	No	Yes	No	No	No	No	No	-11.63	3	4	1	1	4	0.17	0	0	2	7.56
XLGB-32	COc1ccc(cc1)c1oc2c(CC=C(C)C)c(O)cc(c2c(=O)c1O)O	C21H20O6	368.38	27	16	0.19	4	6	3	104.2	100.13	3.26	4.77	4.09	1.31	4.28	3.54	-5.3	0.00183	4.97e-06	Moderately soluble	-6.6	9.17e-05	2.49e-07	Poorly soluble	-5.75	0.000658	1.79e-06	Moderately soluble	High	No	No	No	No	Yes	No	No	-5.16	0	0	0	0	0	0.55	0	1	2	3.79
XLGB-33	Oc1cc(O)c2c(c1)oc(cc2=O)c1ccc(c(c1)O)O	C15H10O6	286.24	21	16	0	1	6	4	76.01	111.13	1.86	2.53	2.28	-0.03	2.03	1.73	-3.71	0.0563	0.000197	Soluble	-4.51	0.00884	3.09e-05	Moderately soluble	-3.82	0.0429	0.00015	Soluble	High	No	No	Yes	No	No	Yes	Yes	-6.25	0	0	0	0	0	0.55	1	1	0	3.02
XLGB-34	Oc1ccc(cc1)c1cc(=O)c2c(o1)cc(cc2O)O	C15H10O5	270.24	20	16	0	1	5	3	73.99	90.9	1.89	3.02	2.58	0.52	2.52	2.11	-3.94	0.0307	0.000114	Soluble	-4.59	0.00688	2.55e-05	Moderately soluble	-4.4	0.0107	3.94e-05	Moderately soluble	High	No	No	Yes	No	No	Yes	Yes	-5.8	0	0	0	0	0	0.55	0	0	0	2.96
XLGB-35	Oc1cc(O)c2c(c1)oc(c(c2=O)O)c1ccc(c(c1)O)O	C15H10O7	302.24	22	16	0	1	7	5	78.03	131.36	1.63	1.54	1.99	-0.56	1.54	1.23	-3.16	0.211	0.000698	Soluble	-3.91	0.0374	0.000124	Soluble	-3.24	0.173	0.000573	Soluble	High	No	No	Yes	No	No	Yes	Yes	-7.05	0	0	0	0	0	0.55	1	1	0	3.23
XLGB-36	CC1=CC[C@H](CC1)C(O)(C)C	C10H18O	154.25	11	0	0.8	1	1	1	48.8	20.23	2.09	3.39	2.5	2.3	2.17	2.49	-2.87	0.21	0.00136	Soluble	-3.49	0.0495	0.000321	Soluble	-1.69	3.17	0.0206	Soluble	High	Yes	No	No	No	No	No	No	-4.83	0	1	0	0	2	0.55	0	1	1	3.24
XLGB-37	CCCCCCC/C=C/C=O	C10H18O	154.25	11	0	0.7	7	1	0	49.91	17.07	2.67	3.69	3.1	2.59	3.14	3.04	-2.66	0.338	0.00219	Soluble	-3.74	0.0281	0.000182	Soluble	-2.72	0.295	0.00191	Soluble	High	Yes	No	No	No	No	No	No	-4.62	0	1	0	0	2	0.55	0	2	2	2.4
XLGB-38	O=C1C[C@@H]2C([C@@]1(C)CC2)(C)C	C10H16O	152.23	11	0	0.9	0	1	0	45.64	17.07	2.12	2.19	2.4	2.3	2.85	2.37	-2.16	1.04	0.00686	Soluble	-2.18	1	0.00657	Soluble	-2.6	0.383	0.00252	Soluble	High	Yes	No	No	No	No	No	No	-5.67	0	1	0	0	2	0.55	0	0	1	3.22
XLGB-39	C=C[C@@](CCC=C(C)C)(O)C	C10H18O	154.25	11	0	0.6	4	1	1	50.44	20.23	2.71	2.97	2.67	2.59	2.35	2.66	-2.4	0.609	0.00395	Soluble	-3.06	0.135	0.000875	Soluble	-1.84	2.2	0.0143	Soluble	High	Yes	No	No	No	No	No	No	-5.13	0	1	0	0	2	0.55	0	1	1	2.74
XLGB-40	C/C=C\c1ccc2c(c1)OCO2	C10H10O2	162.19	12	6	0.2	1	2	0	47.4	18.46	2.54	3.65	2.34	2.02	2.84	2.68	-3.45	0.0577	0.000356	Soluble	-3.73	0.0304	0.000188	Soluble	-2.62	0.392	0.00242	Soluble	High	Yes	No	Yes	No	No	No	No	-4.7	0	0	0	0	1	0.55	0	0	2	2.3
XLGB-41	CC1=CC(=O)[C@H](CC1)C(C)C	C10H16O	152.23	11	0	0.7	1	1	0	47.8	17.07	2.33	2.85	2.57	2.2	2.63	2.51	-2.51	0.467	0.00307	Soluble	-2.87	0.207	0.00136	Soluble	-2.15	1.08	0.0071	Soluble	High	Yes	No	No	No	No	No	No	-5.21	0	1	0	0	2	0.55	0	0	1	3.2
XLGB-42	C=CCc1ccc(c(c1)OC)OC	C11H14O2	178.23	13	6	0.27	4	2	0	53.53	18.46	2.65	2.52	2.43	2.3	3	2.58	-2.61	0.437	0.00245	Soluble	-2.55	0.498	0.00279	Soluble	-3.5	0.0562	0.000316	Soluble	High	Yes	No	Yes	No	No	No	No	-5.6	0	0	0	0	1	0.55	0	1	1	1.71
XLGB-43	O[C@H]1C[C@@H]2C([C@@]1(C)CC2)(C)C	C10H18O	154.25	11	0	1	0	1	1	46.6	20.23	2.33	2.72	2.19	2.45	2.27	2.39	-2.51	0.477	0.00309	Soluble	-2.8	0.245	0.00159	Soluble	-1.91	1.92	0.0124	Soluble	High	Yes	No	No	No	No	No	No	-5.31	0	1	0	0	2	0.55	0	0	1	3.43
XLGB-44	O[C@H]1CC[C@]2([C@H](C1(C)C)CC[C@@]1([C@@H]2CC=C2[C@@]1(C)CC[C@@]1([C@H]2CC(C)(C)CC1)C(=O)O)C)C	C30H48O3	456.7	33	0	0.9	1	3	2	136.65	57.53	3.94	7.49	7.23	5.82	5.85	6.07	-7.32	2.16e-05	4.74e-08	Poorly soluble	-8.53	1.34e-06	2.94e-09	Poorly soluble	-6.12	0.000345	7.55e-07	Poorly soluble	Low	No	No	No	No	No	No	No	-3.77	1	3	0	1	1	0.85	0	1	2	6.08
XLGB-45	CCCCCCCCCCCC(=O)O	C12H24O2	200.32	14	0	0.92	10	2	1	61.57	37.3	2.7	4.2	3.99	3.15	3.5	3.51	-3.07	0.171	0.000855	Soluble	-4.69	0.00406	2.03e-05	Moderately soluble	-3.69	0.0405	0.000202	Soluble	High	Yes	No	No	No	No	No	No	-4.54	0	0	0	0	0	0.85	0	0	3	1.87
XLGB-46	C/C=C/c1cc(OC)c2c(c1)[C@@H](C)[C@@H](O2)c1ccc(c(c1)OC)OC	C21H24O4	340.41	25	12	0.33	5	4	0	99.45	36.92	4.05	4.71	4.55	2.95	4.91	4.23	-4.94	0.00388	1.14e-05	Moderately soluble	-5.21	0.00208	6.11e-06	Moderately soluble	-5.96	0.000374	1.1e-06	Moderately soluble	High	Yes	No	No	Yes	Yes	Yes	Yes	-5.03	0	0	0	0	0	0.55	0	0	1	4.05
XLGB-47	CC[C@@H](C(C)C)CC[C@H]([C@H]1CC[C@@H]2[C@]1(C)CC[C@H]1[C@H]2CC=C2[C@]1(C)CC[C@@H](C2)O[C@@H]1O[C@H](CO)[C@H]([C@@H]([C@H]1O)O)O)C	C35H60O6	576.85	41	0	0.94	9	6	4	165.61	99.38	5.17	7.74	5.85	3.96	5.02	5.55	-7.7	1.15e-05	2e-08	Poorly soluble	-9.67	1.23e-07	2.14e-10	Poorly soluble	-4.4	0.0228	3.94e-05	Moderately soluble	Low	No	No	No	No	No	No	No	-4.32	1	4	0	0	1	0.55	0	1	3	8.02
XLGB-48	CC[C@@H](C(C)C)CC[C@H]([C@H]1CC[C@@H]2[C@]1(C)CC[C@H]1[C@H]2CC=C2[C@]1(C)CC[C@H](C2)O)C	C29H50O	414.71	30	0	0.93	6	1	1	133.23	20.23	5.03	9.34	8.02	6.73	7.04	7.23	-7.9	5.23e-06	1.26e-08	Poorly soluble	-9.67	8.9e-08	2.15e-10	Poorly soluble	-6.19	0.000269	6.49e-07	Poorly soluble	Low	No	No	No	No	No	No	No	-2.2	1	3	0	1	2	0.55	0	1	2	6.3
XLGB-49	CCCCCCCCCCCCCCCCCCCCCC(=O)O	C22H44O2	340.58	24	0	0.95	20	2	1	109.64	37.3	5.26	10.37	7.89	5.58	7.89	7.4	-7.16	2.33e-05	6.84e-08	Poorly soluble	-11.1	2.73e-09	8.03e-12	Insoluble	-7.7	6.75e-06	1.98e-08	Poorly soluble	Low	No	No	Yes	No	No	No	No	-1.01	1	1	1	1	2	0.85	0	0	2	3
XLGB-50	Oc1ccc(cc1)c1oc2cc(O)cc(c2c(=O)c1O)O	C15H10O6	286.24	21	16	0	1	6	4	76.01	111.13	1.7	1.9	2.28	-0.03	2.03	1.58	-3.31	0.14	0.00049	Soluble	-3.86	0.0398	0.000139	Soluble	-3.82	0.0429	0.00015	Soluble	High	No	No	Yes	No	No	Yes	Yes	-6.7	0	0	0	0	0	0.55	0	0	0	3.14
XLGB-51	OC[C@H]1O[C@@H](Oc2c(oc3c(c2=O)c(O)cc(c3)O)c2ccc(c(c2)O)O)[C@@H]([C@H]([C@@H]1O)O)O	C21H20O12	464.38	33	16	0.29	4	12	8	110.16	210.51	0.94	0.36	-0.54	-2.59	-0.59	-0.48	-3.04	0.423	0.00091	Soluble	-4.35	0.021	4.51e-05	Moderately soluble	-1.51	14.3	0.0308	Soluble	Low	No	No	No	No	No	No	No	-8.88	2	1	1	1	3	0.17	1	1	1	5.32
XLGB-52	Cc1cc(O)c2c(c1)C(=O)c1c(C2=O)c(O)cc(c1)O	C15H10O5	270.24	20	12	0.07	0	5	3	70.78	94.83	1.81	2.72	1.89	0.36	2.55	1.87	-3.67	0.0574	0.000212	Soluble	-4.37	0.0117	4.31e-05	Moderately soluble	-3.91	0.0336	0.000124	Soluble	High	No	No	Yes	No	No	No	Yes	-6.02	0	0	0	0	0	0.55	1	0	0	2.57
XLGB-53	CC1=CC=CC(CC1=O)(C)C	C10H14O	150.22	11	0	0.5	0	1	0	47.06	17.07	2.2	2.58	2.49	2.1	2.45	2.36	-2.4	0.603	0.00401	Soluble	-2.59	0.389	0.00259	Soluble	-2.13	1.12	0.00743	Soluble	High	Yes	No	No	No	No	No	No	-5.38	0	1	0	0	2	0.55	0	0	1	3.14
XLGB-54	OC[C@H]1O[C@@H](Oc2c(oc3c(c2=O)c(O)cc(c3)O)c2ccc(cc2)O)[C@@H]([C@H]([C@@H]1O)O)O	C21H20O11	448.38	32	16	0.29	4	11	7	108.13	190.28	1.29	0.72	-0.24	-2.1	-0.12	-0.09	-3.18	0.297	0.000661	Soluble	-4.29	0.0228	5.08e-05	Moderately soluble	-2.1	3.55	0.00791	Soluble	Low	No	No	No	No	No	No	No	-8.52	2	0	1	1	3	0.17	0	0	1	5.29
XLGB-55	O=C1O[C@H]2[C@H](C1=C)CC[C@@]([C@H]1[C@@H]2[C@](C)(O)CC1)(C)O	C15H22O4	266.33	19	0	0.8	0	4	2	71.09	66.76	2.32	1.23	1.41	1.71	1.84	1.7	-2.27	1.44	0.00542	Soluble	-2.23	1.57	0.00589	Soluble	-1.9	3.32	0.0125	Soluble	High	Yes	No	No	No	No	No	No	-7.05	0	0	0	0	0	0.55	0	1	0	4.34
XLGB-56	CCCCCCO	C6H14O	102.17	7	0	1	4	1	1	32.12	20.23	2.03	2.03	1.56	1.53	1.28	1.69	-1.49	3.32	0.0325	Very soluble	-2.08	0.845	0.00827	Soluble	-1.64	2.34	0.0229	Soluble	High	Yes	No	No	No	No	No	No	-5.48	0	2	0	0	2	0.55	0	0	1	1.07
XLGB-57	C[C@H]1CC[C@@]2([C@@]3([C@H]1C[C@H](C2(C)C)CC3)C)O	C15H26O	222.37	16	0	1	0	1	1	68.56	20.23	2.96	4.05	3.61	3.81	3.4	3.57	-3.77	0.0377	0.00017	Soluble	-4.18	0.0147	6.63e-05	Moderately soluble	-3.18	0.146	0.000655	Soluble	High	Yes	No	No	No	Yes	No	No	-4.78	0	0	0	0	1	0.55	0	0	2	3.73
XLGB-58	COc1cc2C[C@@](O)(CO)[C@@H]([C@H](c2cc1O)c1ccc(c(c1)OC)O)CO	C20H24O7	376.4	27	12	0.4	5	7	5	98.53	119.61	2.47	1.54	1.13	0.37	2.04	1.51	-3.14	0.271	0.00072	Soluble	-3.66	0.0821	0.000218	Soluble	-3.68	0.0781	0.000207	Soluble	High	No	Yes	No	No	No	No	No	-7.5	0	0	0	0	0	0.55	0	0	1	4.08
XLGB-59	O[C@H]1CC[C@]2(C(=CC[C@@H]3[C@@H]2CC[C@]2([C@H]3CC[C@@H]2[C@@H](CC[C@@H](C(C)C)C)C)C)C1)C	C28H48O	400.68	29	0	0.93	5	1	1	128.42	20.23	4.83	8.8	7.63	6.54	6.63	6.89	-7.54	1.16e-05	2.9e-08	Poorly soluble	-9.11	3.13e-07	7.8e-10	Poorly soluble	-5.79	0.000642	1.6e-06	Moderately soluble	Low	No	No	No	No	No	No	No	-2.5	1	2	0	1	2	0.55	0	1	2	6.17
XLGB-60	C[C@H]1CC=C[C@H](C)CC[C@H](CC1)C(C)C	C15H28	208.38	15	0	0.87	1	0	0	71.63	0	3.46	6.26	5.05	5.65	3.75	4.83	-5.01	0.00204	9.78e-06	Moderately soluble	-6.05	0.000187	8.97e-07	Poorly soluble	-3.11	0.163	0.000782	Soluble	Low	No	No	No	Yes	Yes	No	No	-3.13	1	0	0	0	2	0.55	0	1	2	4.44
XLGB-61	CC([C@@H]1CC[C@]2([C@H]3[C@@H]1[C@@H]2C(=CC3)C)C)C	C15H24	204.35	15	0	0.87	1	0	0	67.14	0	3.39	4.47	4.27	5.65	3.73	4.3	-3.86	0.0284	0.000139	Soluble	-4.19	0.0132	6.46e-05	Moderately soluble	-3.07	0.174	0.000851	Soluble	Low	Yes	No	Yes	Yes	Yes	No	No	-4.37	1	0	0	0	1	0.55	0	1	2	4.62
XLGB-62	CCCCCCCCCC(=O)O	C10H20O2	172.26	12	0	0.9	8	2	1	51.96	37.3	2.5	4.09	3.21	2.58	2.63	3	-2.96	0.19	0.0011	Soluble	-4.58	0.00454	2.64e-05	Moderately soluble	-2.87	0.23	0.00134	Soluble	High	Yes	No	No	No	No	No	No	-4.45	0	0	0	0	1	0.85	0	0	3	1.67
XLGB-63	CCCCC/C=C/C/C=C/CCCCCCCCOC(=O)C	C20H36O2	308.5	22	0	0.75	16	2	0	98.59	26.3	4.55	7.21	6.36	4.93	6.8	5.97	-5.24	0.00178	5.77e-06	Moderately soluble	-7.59	8.02e-06	2.6e-08	Poorly soluble	-5.77	0.000523	1.69e-06	Moderately soluble	High	No	No	Yes	No	Yes	No	No	-3.06	1	1	1	1	2	0.55	0	1	2	3.29
XLGB-64	CC(=O)/C=C/[C@@H]1C(=CCCC1(C)C)C	C13H20O	192.3	14	0	0.62	2	1	0	61.48	17.07	2.81	3.85	3.51	2.94	3.41	3.31	-3.33	0.0908	0.000472	Soluble	-3.9	0.0239	0.000125	Soluble	-2.65	0.433	0.00225	Soluble	High	Yes	No	No	No	Yes	No	No	-4.74	0	0	0	0	2	0.55	0	2	2	3.53
XLGB-65	CC[C@H](C(C)C)CC[C@H]([C@H]1CC[C@@H]2[C@]1(C)CC[C@H]1[C@H]2CC=C2[C@]1(C)CC[C@@H](C2)O)C	C29H50O	414.71	30	0	0.93	6	1	1	133.23	20.23	5.07	9.34	8.02	6.73	7.04	7.24	-7.9	5.23e-06	1.26e-08	Poorly soluble	-9.67	8.9e-08	2.15e-10	Poorly soluble	-6.19	0.000269	6.49e-07	Poorly soluble	Low	No	No	No	No	No	No	No	-2.2	1	3	0	1	2	0.55	0	1	2	6.3
XLGB-66	Oc1ccc(cc1)/C=C/C(=O)c1ccc(cc1O)O	C15H12O4	256.25	19	12	0	3	4	3	72.32	77.76	2.02	3.18	2.59	1.58	2.48	2.37	-3.7	0.0509	0.000199	Soluble	-4.48	0.00841	3.28e-05	Moderately soluble	-3.23	0.15	0.000586	Soluble	High	Yes	No	Yes	No	Yes	No	Yes	-5.61	0	0	0	0	0	0.55	0	1	0	2.52
XLGB-67	Oc1ccc(cc1)[C@@H]1CC(=O)c2c(O1)cc(cc2)O	C15H12O4	256.25	19	12	0.13	1	4	2	69.55	66.76	1.73	2.3	2.48	1.27	2.55	2.07	-3.28	0.135	0.000526	Soluble	-3.34	0.117	0.000457	Soluble	-4	0.0258	0.000101	Soluble	High	Yes	Yes	Yes	No	No	No	No	-6.23	0	0	0	0	0	0.55	0	0	0	2.95
XLGB-68	C[C@@H]1CCC(=C(C)C)C(=O)C1	C10H16O	152.23	11	0	0.7	0	1	0	47.8	17.07	2.32	3.08	2.71	2.2	2.76	2.61	-2.72	0.287	0.00189	Soluble	-3.11	0.119	0.000784	Soluble	-2.38	0.635	0.00417	Soluble	High	Yes	No	No	No	No	No	No	-5.04	0	1	0	0	2	0.55	0	1	1	2.75
XLGB-69	O=C1[C@@]2(C)CC[C@@H](C1(C)C)C2	C10H16O	152.23	11	0	0.9	0	1	0	45.64	17.07	2.21	3.52	2.4	2.3	2.85	2.66	-3	0.152	0.000997	Soluble	-3.56	0.0417	0.000274	Soluble	-2.6	0.383	0.00252	Soluble	High	Yes	No	No	No	No	No	No	-4.73	0	1	0	0	2	0.55	0	0	2	3.22
XLGB-70	COc1cc(cc(c1O)OC)c1cc(=O)c2c(o1)cc(cc2O)O	C17H14O7	330.29	24	16	0.12	3	7	3	86.97	109.36	2.58	3.07	2.59	-0.07	2.59	2.15	-4.12	0.0252	7.63e-05	Moderately soluble	-5.03	0.00306	9.26e-06	Moderately soluble	-4.63	0.00771	2.33e-05	Moderately soluble	High	No	No	Yes	No	Yes	Yes	Yes	-6.14	0	0	0	0	0	0.55	0	0	0	3.21
XLGB-71	CC([C@@H]1CC[C@H]([C@]23[C@H]1[C@H]2C(=CC3)C)C)C	C15H24	204.35	15	0	0.87	1	0	0	67.14	0	3.4	4.47	4.27	5.65	3.73	4.3	-3.86	0.0284	0.000139	Soluble	-4.19	0.0132	6.46e-05	Moderately soluble	-3.07	0.174	0.000851	Soluble	Low	Yes	No	Yes	Yes	Yes	No	No	-4.37	1	0	0	0	1	0.55	0	1	2	5.31
XLGB-72	CCCCCCCCCCCCCCCC(=O)OCC1=C[C@H]2[C@H]3[C@H](C3(C)C)C[C@H]([C@]3([C@@]([C@@H]1O)(O)[C@@H](O)C(=C3)C)C2=O)C	C36H58O6	586.84	42	0	0.83	17	6	3	170.25	104.06	6.17	7.56	6.85	4.25	7.69	6.5	-7.12	4.46e-05	7.6e-08	Poorly soluble	-9.58	1.54e-07	2.62e-10	Poorly soluble	-7.7	1.18e-05	2e-08	Poorly soluble	Low	No	Yes	No	No	No	No	Yes	-4.51	2	4	1	1	2	0.17	0	1	3	7.93
XLGB-73	COc1ccc(cc1)CC=C	C10H12O	148.2	11	6	0.2	3	1	0	47.04	9.23	2.47	3.37	2.42	2.67	2.96	2.78	-3.09	0.121	0.000817	Soluble	-3.24	0.0849	0.000573	Soluble	-3.35	0.0654	0.000442	Soluble	High	Yes	No	Yes	No	No	No	No	-4.81	0	1	0	0	2	0.55	0	1	1	1.28
XLGB-74	COc1ccc(cc1c1c(O)cc(c2c1oc(cc2=O)c1ccc(cc1)O)O)c1cc(=O)c2c(o1)cc(cc2O)OC	C32H22O10	566.51	42	32	0.06	5	10	4	155.91	159.8	3.94	5.69	5.74	0.63	5.72	4.34	-7.17	3.82e-05	6.75e-08	Poorly soluble	-8.81	8.74e-07	1.54e-09	Poorly soluble	-10.07	4.78e-08	8.43e-11	Insoluble	Low	No	No	No	No	Yes	No	No	-5.72	1	3	1	1	2	0.55	0	0	2	4.5
XLGB-75	COc1ccc(cc1)c1cc(=O)c2c(o1)c(c(cc2O)O)c1cc(ccc1OC)c1cc(=O)c2c(o1)cc(cc2O)O	C32H22O10	566.51	42	32	0.06	5	10	4	155.91	159.8	4.17	5.69	5.74	0.63	5.72	4.39	-7.17	3.82e-05	6.75e-08	Poorly soluble	-8.81	8.74e-07	1.54e-09	Poorly soluble	-10.07	4.78e-08	8.43e-11	Insoluble	Low	No	No	No	No	Yes	No	No	-5.72	1	3	1	1	2	0.55	0	0	2	4.47
XLGB-76	COc1c(OC)cc(cc1OC)C	C10H14O3	182.22	13	6	0.4	3	3	0	50.88	27.69	2.56	1.82	2.02	1.49	2.31	2.04	-2.26	1	0.0055	Soluble	-2.02	1.73	0.00952	Soluble	-3.17	0.124	0.000681	Soluble	High	Yes	No	Yes	No	No	No	No	-6.12	0	0	0	0	1	0.55	0	0	1	1.48
XLGB-77	C=C1[C@@H]2CC[C@@H]3[C@@]1(C)CCCC([C@@H]23)(C)C	C15H24	204.35	15	0	0.87	0	0	0	66.88	0	3.14	5.08	4.42	5.65	4.19	4.5	-4.31	0.0101	4.93e-05	Moderately soluble	-4.82	0.00307	1.5e-05	Moderately soluble	-3.77	0.0349	0.000171	Soluble	Low	No	No	No	Yes	Yes	No	No	-3.94	1	0	0	0	2	0.55	0	1	2	3.6
XLGB-78	COc1ccc2c(c1O)c1c(O)c(OC)cc3c1[C@H](C2)[N](C)(C)CC3	C20H24NO4	342.41	25	12	0.4	2	4	2	101.87	62.16	-0.7	2.74	2.33	1.98	3.01	1.87	-3.91	0.0419	0.000122	Soluble	-3.7	0.0683	0.0002	Soluble	-5.69	0.000704	2.06e-06	Moderately soluble	High	Yes	Yes	No	No	No	Yes	Yes	-6.44	0	0	0	0	0	0.55	0	0	0	3.78
XLGB-79	OC[C@@H]1O[C@@H](OCCc2ccc(cc2)O)[C@H]([C@@H]([C@@H]1O)O)O	C14H20O7	300.3	21	6	0.57	5	7	5	71.78	119.61	1.69	-1.05	-1.25	-1.22	-0.48	-0.46	-0.92	36	0.12	Very soluble	-0.97	31.9	0.106	Very soluble	-0.44	108	0.361	Soluble	High	No	No	Yes	No	No	No	No	-8.88	0	1	0	0	0
XLGB-80	OCCc1ccc(cc1)O	C8H10O2	138.16	10	6	0.25	2	2	2	39.4	40.46	1.4	0.43	0.93	1.21	1.52	1.1	-1.28	7.26	0.0525	Very soluble	-0.85	19.6	0.142	Very soluble	-2.03	1.3	0.0094	Soluble	High	Yes	No	No	No	No	No	No	-6.84	0	2	0	0	1	0.55	0	0	1	1
XLGB-81	CCCCCCCCCCCCCCCCCCC[C@@H](CCCCCCCCC)O	C29H60O	424.79	30	0	1	26	1	1	142.68	20.23	7.47	14.03	10.53	7.27	11.23	10.11	-9.6	1.08e-07	2.53e-10	Poorly soluble	-14.53	1.24e-12	2.92e-15	Insoluble	-10.55	1.19e-08	2.81e-11	Insoluble	Low	No	Yes	No	No	No	No	No	1.07	1	3	1	1	3	0.55	0	0	3	4.29
XLGB-82	COc1cc(ccc1O)c1cc(=O)c2c(o1)cc(cc2O)O	C16H12O6	300.26	22	16	0.06	2	6	3	80.48	100.13	2.44	3.1	2.59	0.22	2.55	2.18	-4.06	0.0261	8.69e-05	Moderately soluble	-4.87	0.00404	1.35e-05	Moderately soluble	-4.52	0.00907	3.02e-05	Moderately soluble	High	No	No	Yes	No	Yes	Yes	Yes	-5.93	0	0	0	0	0	0.55	0	0	0	3.06
XLGB-83	COc1ccc(cc1)c1cc(=O)c2c(o1)cc(cc2O)OC	C17H14O5	298.29	22	16	0.12	3	5	1	82.93	68.9	2.55	3.67	3.18	1.01	3.55	2.79	-4.34	0.0136	4.55e-05	Moderately soluble	-4.81	0.00466	1.56e-05	Moderately soluble	-5.8	0.000474	1.59e-06	Moderately soluble	High	Yes	No	Yes	Yes	Yes	Yes	Yes	-5.51	0	0	0	0	0	0.55	0	0	1	3.14
XLGB-84	O=c1ccoc(c1O)C	C6H6O3	126.11	9	6	0.17	0	3	1	31.97	50.44	1.47	0.09	0.65	-0.84	1.36	0.55	-1.17	8.49	0.0673	Very soluble	-0.7	24.9	0.198	Very soluble	-1.71	2.48	0.0197	Soluble	High	Yes	No	No	No	No	No	No	-7.01	0	3	0	0	1	0.55	0	0	1	2.39
XLGB-85	C/C=C\C(=O)C1=C(C)C=CCC1(C)C	C13H18O	190.28	14	0	0.46	2	1	0	61.01	17.07	2.74	3.18	3.43	2.85	3.4	3.12	-2.89	0.244	0.00128	Soluble	-3.21	0.117	0.000617	Soluble	-2.63	0.448	0.00236	Soluble	High	Yes	No	Yes	No	No	No	No	-5.2	0	0	0	0	2	0.55	0	1	1	3.64
XLGB-86	CC(=CCc1c(O)cc(c2c1oc(c1ccc(cc1)O)c(c2=O)O)O)C	C20H18O6	354.35	26	16	0.15	3	6	4	99.73	111.13	2.88	4.45	3.79	1.09	3.73	3.19	-5.1	0.00283	7.98e-06	Moderately soluble	-6.5	0.000111	3.14e-07	Poorly soluble	-5.05	0.00312	8.81e-06	Moderately soluble	High	No	No	Yes	No	Yes	Yes	No	-5.3	0	0	0	0	0	0.55	0	1	2	3.73
XLGB-87	C/C=C/c1cc(OC)c(cc1OC)OC	C12H16O3	208.25	15	6	0.33	4	3	0	60.82	27.69	3.02	3	2.64	1.97	2.89	2.7	-3.05	0.184	0.000885	Soluble	-3.25	0.118	0.000568	Soluble	-3.26	0.113	0.000545	Soluble	High	Yes	No	Yes	Yes	No	No	No	-5.44	0	0	0	0	0	0.55	0	0	1	2.39
XLGB-88	CCCCCCCCCCCCC/C=C\CC	C17H34	238.45	17	0	0.88	13	0	0	83.36	0	4.77	8.49	6.65	6.54	6.47	6.58	-5.81	0.00037	1.55e-06	Moderately soluble	-8.36	1.04e-06	4.35e-09	Poorly soluble	-6.01	0.000231	9.71e-07	Poorly soluble	Low	No	No	Yes	No	No	No	No	-1.73	1	1	1	1	2	0.55	0	1	3	3.38
XLGB-89	COc1cc(OC)cc(c1)C	C9H12O2	152.19	11	6	0.33	2	2	0	44.39	18.46	2.44	2.23	2.01	1.8	2.29	2.15	-2.46	0.528	0.00347	Soluble	-2.25	0.85	0.00559	Soluble	-3.02	0.144	0.000948	Soluble	High	Yes	No	Yes	No	No	No	No	-5.65	0	1	0	0	1	0.55	0	0	1	1.13
XLGB-90	C[C@@H]1CC[C@@H]([C@@H](C1)O)C(C)C	C10H20O	156.27	11	0	1	1	1	1	49.23	20.23	2.62	3.4	2.44	2.45	2.06	2.59	-2.88	0.204	0.0013	Soluble	-3.5	0.0489	0.000313	Soluble	-1.48	5.22	0.0334	Soluble	High	Yes	No	No	No	No	No	No	-4.84	0	1	0	0	2	0.55	0	0	1	2.63
XLGB-91	CCCCCCCCOC=O	C9H18O2	158.24	11	0	0.89	8	2	0	47.05	26.3	2.72	3.55	2.52	2.28	2.5	2.71	-2.53	0.467	0.00295	Soluble	-3.79	0.0258	0.000163	Soluble	-2.78	0.264	0.00167	Soluble	High	Yes	No	No	No	No	No	No	-4.74	0	1	0	0	1	0.55	0	1	3	1.52
XLGB-92	COc1cc(ccc1O)C[C@]1(O)CO[C@@H]([C@H]1CO)c1ccc(c(c1)OC)O	C20H24O7	376.4	27	12	0.4	6	7	4	98.29	108.61	2.77	1.89	1.44	0.37	2.37	1.77	-3.3	0.19	0.000504	Soluble	-3.79	0.0606	0.000161	Soluble	-4	0.0378	0.0001	Soluble	High	No	Yes	No	No	No	Yes	No	-7.25	0	0	0	0	0	0.55	0	0	1	4.07
XLGB-93	OC[C@H]1O[C@@H](Oc2c(oc3c(c2=O)c(O)cc(c3)O)c2ccc(c(c2)O)O)[C@@H]([C@H]([C@H]1O)O)O	C21H20O12	464.38	33	16	0.29	4	12	8	110.16	210.51	1.45	0.36	-0.54	-2.59	-0.59	-0.38	-3.04	0.423	0.00091	Soluble	-4.35	0.021	4.51e-05	Moderately soluble	-1.51	14.3	0.0308	Soluble	Low	No	No	No	No	No	No	No	-8.88	2	1	1	1	3	0.17	1	1	1	5.32
XLGB-94	Oc1cc(O)c2c(c1)oc(c(c2=O)O[C@H]1O[C@H](C)[C@H]([C@@H]([C@@H]1O)O)O)c1ccc(c(c1)O)O	C21H20O11	448.38	32	16	0.29	3	11	7	109	190.28	1.76	0.86	0.49	-1.84	0.01	0.26	-3.33	0.208	0.000464	Soluble	-4.44	0.0163	3.63e-05	Moderately soluble	-2.08	3.69	0.00822	Soluble	Low	No	No	No	No	No	No	No	-8.42	2	0	1	1	3	0.17	1	1	1	5.28
XLGB-95	Oc1ccc2c(c1)oc(c(c2=O)O)c1cc(O)c(c(c1)O)O	C15H10O7	302.24	22	16	0	1	7	5	78.04	131.36	1	1.61	1.99	-0.56	1.54	1.12	-3.2	0.191	0.00063	Soluble	-3.98	0.0316	0.000105	Soluble	-3.24	0.173	0.000573	Soluble	High	No	No	Yes	No	No	Yes	Yes	-7	0	0	0	0	0	0.55	1	1	0	3.21
XLGB-96	OC[C@@H]1O[C@H](Oc2c(oc3c(c2=O)c(O)cc(c3CC=C(C)C)O[C@@H]2O[C@H](CO)[C@H]([C@@H]([C@H]2O)O)O)c2ccc(cc2)O)[C@@H]([C@@H]([C@H]1O[C@@H]1O[C@H](C)[C@H]([C@@H]([C@H]1O)O)O)O)O	C38H48O20	824.78	58	16	0.55	11	20	12	195.2	328.35	3.36	-0.81	-2.41	-4.67	-1.87	-1.28	-3.92	0.0988	0.00012	Soluble	-5.61	0.00204	2.48e-06	Moderately soluble	-0.2	514	0.624	Soluble	Low	No	Yes	No	No	No	No	No	-11.91	3	4	2	1	4	0.17	0	1	2	8.26
XLGB-97	OC[C@H]1O[C@@H](O[C@@H]2[C@@H](O[C@@H]([C@@H]([C@H]2O)O)C)Oc2c(oc3c(c2=O)c(O)cc(c3CC=C(C)C)O)c2ccc(cc2)OC)[C@@H]([C@@H]([C@@H]1O)O)O	C33H40O15	676.66	48	16	0.48	9	15	8	167.54	238.2	3.08	1.87	0.42	-2.35	0.77	0.76	-4.87	0.00921	1.36e-05	Moderately soluble	-6.49	0.000217	3.21e-07	Poorly soluble	-2.74	1.23	0.00181	Soluble	Low	No	Yes	No	No	No	No	No	-9.1	3	3	1	1	4	0.17	0	1	2	7.21
XLGB-98	COc1ccc(cc1)c1oc2c(CC=C(C)C)c(O)cc(c2c(=O)c1O)O	C21H20O6	368.38	27	16	0.19	4	6	3	104.2	100.13	3.26	4.77	4.09	1.31	4.28	3.54	-5.3	0.00183	4.97e-06	Moderately soluble	-6.6	9.17e-05	2.49e-07	Poorly soluble	-5.75	0.000658	1.79e-06	Moderately soluble	High	No	No	No	No	Yes	No	No	-5.16	0	0	0	0	0	0.55	0	1	2	3.79
XLGB-99	COc1ccc(cc1)c1oc2c(CC=C(C)C)c(O)cc(c2c(=O)c1O[C@@H]1O[C@H](C)[C@@H]([C@H]([C@@H]1O[C@@H]1OC[C@H]([C@H]([C@H]1O)O)O)O)O)O	C32H38O14	646.64	46	16	0.47	8	14	7	161.58	217.97	5.35	1.94	1.06	-1.8	1.23	1.56	-4.8	0.0102	1.58e-05	Moderately soluble	-6.14	0.000467	7.22e-07	Poorly soluble	-3.19	0.421	0.000652	Soluble	Low	No	Yes	No	No	No	No	No	-8.87	3	3	1	1	4	0.17	0	1	2	6.98
XLGB-100	OC[C@H]1O[C@@H](Oc2c(oc3c(c2=O)c(O)cc(c3)O)c2ccc(cc2)O)[C@@H]([C@H]([C@H]1O)O)O	C21H20O11	448.38	32	16	0.29	4	11	7	108.13	190.28	1.44	0.72	-0.24	-2.1	-0.12	-0.06	-3.18	0.297	0.000661	Soluble	-4.29	0.0228	5.08e-05	Moderately soluble	-2.1	3.55	0.00791	Soluble	Low	No	No	No	No	No	No	No	-8.52	2	0	1	1	3	0.17	0	0	1	5.29
XLGB-101	COc1ccc(cc1)c1oc2c(CCC(O)(C)C)c(O)cc(c2c(=O)c1O[C@@H]1O[C@H](C)[C@@H]([C@H]([C@@H]1O[C@@H]1O[C@H](C)[C@@H]([C@H]([C@@H]1O)O)O)O)O)O	C33H42O15	678.68	48	16	0.55	9	15	8	168.06	238.2	2.36	1	0.64	-2.28	0.78	0.5	-4.33	0.0317	4.67e-05	Moderately soluble	-5.59	0.00174	2.56e-06	Moderately soluble	-3.08	0.558	0.000822	Soluble	Low	No	Yes	No	No	No	No	No	-9.73	3	3	1	1	4	0.17	0	0	2	7.27
XLGB-102	COc1ccc(cc1)c1oc2c(CCC(O)(C)C)c(O)cc(c2c(=O)c1O)O	C21H22O7	386.4	28	16	0.29	5	7	4	105.87	120.36	3.11	3.4	3.29	0.59	3.68	2.81	-4.47	0.0131	3.38e-05	Moderately soluble	-5.61	0.000955	2.47e-06	Moderately soluble	-5.52	0.00116	3.01e-06	Moderately soluble	High	No	No	Yes	No	No	Yes	No	-6.24	0	0	0	0	0	0.55	0	0	1	3.78
XLGB-103	OC[C@H]1O[C@@H](Oc2cc3oc(cc(=O)c3cc2CC=C(C)C)c2cc(O)c(c(c2)O)OC)[C@@H]([C@H]([C@@H]1O)O)O	C27H30O11	530.52	38	16	0.37	7	11	6	136.32	179.28	2.91	2.21	1.57	-0.92	2.23	1.6	-4.37	0.0226	4.25e-05	Moderately soluble	-5.61	0.0013	2.46e-06	Moderately soluble	-3.98	0.0552	0.000104	Soluble	Low	No	Yes	No	No	No	No	No	-7.97	3	2	1	1	3	0.17	0	1	1	5.8
XLGB-104	COc1c(O)cc(cc1O)c1cc(=O)c2c(o1)cc(c(c2)CC=C(C)C)O	C21H20O6	368.38	27	16	0.19	4	6	3	104.2	100.13	3.04	4.01	4.09	1.31	4.28	3.35	-4.82	0.00551	1.5e-05	Moderately soluble	-5.82	0.000564	1.53e-06	Moderately soluble	-5.75	0.000658	1.79e-06	Moderately soluble	High	No	No	No	No	Yes	No	No	-5.7	0	0	0	0	0	0.55	0	1	2	3.54
XLGB-105	CO[C@H]1CC=C2[C@]3(C1)N(CCCc1c3cc(OC)c(c1)OC)CC2	C20H27NO3	329.43	24	6	0.6	3	4	0	98.39	30.93	3.47	2.67	2.8	2.44	3.35	2.95	-3.55	0.0925	0.000281	Soluble	-2.97	0.352	0.00107	Soluble	-4.65	0.00741	2.25e-05	Moderately soluble	High	Yes	Yes	No	No	No	Yes	Yes	-6.41	0	0	0	0	0	0.55	0	1	0	4.84
XLGB-106	COc1cc2C[C@@](C)(O)[C@H](C)Cc3c(c2c(c1OC)OC)c(OC)c1c(c3)OCO1	C23H28O7	416.46	30	12	0.48	4	7	1	112.15	75.61	3.64	3.9	3.6	1.96	4.39	3.5	-4.91	0.00511	1.23e-05	Moderately soluble	-5.19	0.00271	6.52e-06	Moderately soluble	-6.15	0.000293	7.03e-07	Poorly soluble	High	Yes	No	No	No	Yes	Yes	Yes	-6.07	0	0	0	0	0	0.55	0	0	2	4.58
XLGB-107	Oc1cc(O)c2c(c1)oc(cc2=O)c1cc(C[C@@H](C(=C)C)O)c2c(c1)C=CC(O2)(C)C	C25H24O6	420.45	31	16	0.24	4	6	3	120.97	100.13	3.78	4.82	4.43	1.83	5.05	3.98	-5.6	0.00105	2.5e-06	Moderately soluble	-6.66	9.29e-05	2.21e-07	Poorly soluble	-6.46	0.000146	3.48e-07	Poorly soluble	High	No	No	No	No	Yes	No	Yes	-5.44	0	0	0	0	0	0.55	0	1	2	4.59
XLGB-108	CC(=CCc1cc(cc(c1O)C[C@H](C(=C)C)O)c1cc(=O)c2c(o1)cc(cc2O)O)C	C25H26O6	422.47	31	16	0.24	6	6	4	122.59	111.13	3.48	5.97	4.57	1.83	5.41	4.25	-6.21	0.000263	6.22e-07	Poorly soluble	-8.08	3.51e-06	8.32e-09	Poorly soluble	-6.29	0.000219	5.18e-07	Poorly soluble	High	No	No	No	No	Yes	No	Yes	-4.64	0	0	0	0	1	0.55	0	1	2	4.42
XLGB-109	Oc1cc(O)c2c(c1)oc(cc2=O)c1ccc2c(c1)C=CC(O2)(C)C	C20H16O5	336.34	25	16	0.15	1	5	2	96.09	79.9	3.16	4.44	3.95	1.64	3.9	3.42	-5.13	0.00249	7.41e-06	Moderately soluble	-5.84	0.00049	1.46e-06	Moderately soluble	-5.81	0.000517	1.54e-06	Moderately soluble	High	No	No	Yes	No	Yes	No	Yes	-5.2	0	0	0	0	0	0.55	0	0	1	3.7
XLGB-110	CC(=CCc1cc(ccc1O)c1cc(=O)c2c(o1)cc(cc2O)O)C	C20H18O5	338.35	25	16	0.15	3	5	3	97.71	90.9	3.04	4.95	4.09	1.64	4.21	3.58	-5.33	0.00158	4.66e-06	Moderately soluble	-6.6	8.56e-05	2.53e-07	Poorly soluble	-5.64	0.000773	2.29e-06	Moderately soluble	High	No	No	No	No	Yes	No	No	-4.85	0	0	0	0	0	0.55	0	1	1	3.48
XLGB-111	Oc1cc(O)c2c(c1)oc(cc2=O)c1cc(O)c2c(c1)C=CC(O2)(C)C	C20H16O6	352.34	26	16	0.15	1	6	3	98.11	100.13	3.04	3.81	3.65	1.09	3.42	3	-4.81	0.0054	1.53e-05	Moderately soluble	-5.61	0.00087	2.47e-06	Moderately soluble	-5.23	0.00208	5.92e-06	Moderately soluble	High	No	No	Yes	No	Yes	Yes	Yes	-5.74	0	0	0	0	0	0.55	0	0	2	3.77
XLGB-112	OC[C@H]1O[C@@H](O[C@@H]2C[C@H](O)[C@@]3([C@@H](C2(C)C)CC[C@@]2([C@@H]3C[C@H](C)[C@@H]3[C@@]2(C)CC[C@H]3[C@@](O[C@@H]2O[C@H](CO[C@@H]3O[C@@H](C)[C@@H]([C@H]([C@H]3O)O)O)[C@H]([C@@H]([C@H]2O)O)O)(CCC=C(C)C)C)C)C)[C@@H]([C@H]([C@@H]1O)O)O[C@@H]1O[C@H](CO)[C@H]([C@@H]([C@H]1O)O)O	C55H94O22	1107.32	77	0	0.96	15	22	14	273.06	357.06	0.1	1.39	-0.93	-3.48	-1.65	-0.91	-6.59	0.000284	2.56e-07	Poorly soluble	-8.49	3.57e-06	3.22e-09	Poorly soluble	1.35	25000	22.6	Soluble	Low	No	Yes	No	No	No	No	No	-12.07	3	4	2	1	5	0.17	0	2	2	10
XLGB-113	COc1ccc2c(c1OC)c1c(oc2=O)c(O)cc2c1C(=O)[N](CC2)(C)C	C20H20NO6	370.38	27	14	0.3	2	7	1	105.53	89.21	-1.03	2.46	2.08	2.22	3.12	1.77	-3.94	0.0427	0.000115	Soluble	-3.98	0.039	0.000105	Soluble	-6.46	0.000128	3.45e-07	Poorly soluble	High	No	Yes	No	No	No	No	No	-6.81	0	0	0	0	0	0.55	0	2	1	3.2
XLGB-114	CC/C=C/CCO[C@@H]1O[C@H](CO)[C@H]([C@@H]([C@H]1O)O)O	C12H22O6	262.3	18	0	0.83	6	6	4	64.03	99.38	2.09	-0.88	-0.84	-1.02	-0.23	-0.18	-0.52	80	0.305	Very soluble	-0.73	49.4	0.188	Very soluble	0.6	1050	4.02	Soluble	High	No	Yes	No	No	No	No	No	-8.52	0	1	0	0	0	0.55	0	1	0	4.96
XLGB-115	CC(=CCc1cc(ccc1O)c1cc(=O)c2c(o1)c(CC=C(C)C)c(cc2O)O)C	C25H26O5	406.47	30	16	0.24	5	5	3	121.43	90.9	3.62	6.52	5.59	2.64	6.01	4.88	-6.53	0.000119	2.94e-07	Poorly soluble	-8.23	2.42e-06	5.94e-09	Poorly soluble	-6.86	5.64e-05	1.39e-07	Poorly soluble	High	No	No	No	No	No	No	No	-4.15	0	0	0	0	1	0.55	0	1	2	4.09
XLGB-116	CC(=CCc1cccc2c1oc(cc2=O)c1ccccc1)C	C20H18O2	290.36	22	16	0.15	3	2	0	91.64	30.21	3.49	5.49	4.97	3.39	5.66	4.6	-5.44	0.00106	3.64e-06	Moderately soluble	-5.88	0.00038	1.31e-06	Moderately soluble	-7.39	1.18e-05	4.07e-08	Poorly soluble	High	Yes	No	Yes	Yes	Yes	No	No	-4.17	0	0	0	0	1	0.55	0	1	1	3.51
XLGB-117	COc1ccc(cc1)c1oc2c(CC=C(C)C)c(O[C@@H]3O[C@@H](CO)[C@@H]([C@H]([C@@H]3O[C@H]3O[C@@H](CO)[C@@H]([C@@H]([C@@H]3O)O)O)O)O)cc(c2c(=O)c1O[C@@H]1O[C@@H](C)[C@@H]([C@H]([C@H]1O[C@H]1O[C@@H](C)[C@@H]([C@H]([C@@H]1O)O)O)O)O)O	C45H60O24	984.94	69	16	0.62	14	24	13	230.89	376.27	3.85	-1.02	-3.26	-5.92	-2.78	-1.82	-4.55	0.0277	2.81e-05	Moderately soluble	-6.39	0.000397	4.03e-07	Poorly soluble	0.41	2560	2.59	Soluble	Low	No	Yes	No	No	No	No	No	-13.03	3	4	2	1	4	0.17	0	1	2	9.45
XLGB-118	COc1ccc(cc1)c1oc2c3CCC(Oc3cc(c2c(=O)c1O)O)(C)C	C21H20O6	368.38	27	16	0.29	2	6	2	102.26	89.13	3.52	4.18	3.98	1.39	4.36	3.49	-5.06	0.00318	8.63e-06	Moderately soluble	-5.76	0.000639	1.74e-06	Moderately soluble	-6.39	0.000151	4.1e-07	Poorly soluble	High	No	No	Yes	No	Yes	No	Yes	-5.58	0	0	0	0	0	0.55	0	0	2	3.74
XLGB-119	COc1ccc(cc1)c1oc2c(CC=C(C)C)c(O[C@H]3O[C@H](CO)[C@H]([C@@H]([C@H]3O)O)O)cc(c2c(=O)c1O[C@H]1O[C@@H](C)[C@@H]([C@H]([C@H]1O)O)O)O	C33H40O15	676.66	48	16	0.48	9	15	8	167.28	238.2	3.32	1.66	0.07	-2.35	0.77	0.69	-4.73	0.0125	1.85e-05	Moderately soluble	-6.28	0.000358	5.3e-07	Poorly soluble	-2.74	1.23	0.00181	Soluble	Low	No	Yes	No	No	No	No	No	-9.25	3	3	1	1	4	0.17	0	1	2	7.24
XLGB-120	COc1cc(O)c2c(c1CC=C(C)C)oc(cc2=O)c1ccc(cc1)O	C21H20O5	352.38	26	16	0.19	4	5	2	102.18	79.9	3.37	4.92	4.39	1.86	4.75	3.86	-5.32	0.0017	4.83e-06	Moderately soluble	-6.33	0.000163	4.63e-07	Poorly soluble	-6.33	0.000163	4.63e-07	Poorly soluble	High	No	No	No	Yes	Yes	No	No	-4.96	0	0	0	0	0	0.55	0	1	2	3.65
XLGB-121	OC[C@H]([C@H](c1ccc(c(c1)OC)O)O)c1ccc(c(c1)OC)O	C17H20O6	320.34	23	12	0.29	6	6	4	84.86	99.38	2.54	1.37	1.6	0.86	2.15	1.7	-2.68	0.67	0.00209	Soluble	-3.06	0.279	0.000871	Soluble	-3.35	0.143	0.000446	Soluble	High	No	No	No	No	No	No	Yes	-7.28	0	0	0	0	0
XLGB-122	COc1ccc(cc1)c1oc2c(CC=C(C)C)c(O[C@@H]3O[C@H](CO)[C@H]([C@@H]([C@H]3O)O)O)cc(c2c(=O)c1O[C@H]1O[C@@H](C)[C@@H]([C@H]([C@H]1O[C@H]1O[C@@H](C)[C@@H]([C@H]([C@H]1O)O)O)O)O)O	C39H50O19	822.8	58	16	0.56	11	19	10	198.51	297.12	3.2	0.57	-1.08	-3.78	-0.71	-0.36	-4.78	0.0137	1.66e-05	Moderately soluble	-6.38	0.000341	4.15e-07	Poorly soluble	-1.47	27.9	0.034	Soluble	Low	No	Yes	No	No	No	No	No	-10.91	3	4	2	1	4	0.17	0	1	2	8.35
XLGB-123	COc1ccc(cc1)c1oc2c(CC=C(C)C)c(O)cc(c2c(=O)c1O[C@@H]1O[C@@H](C)[C@@H]([C@H]([C@H]1O)O)O)O	C27H30O10	514.52	37	16	0.37	6	10	5	135.16	159.05	3.56	3.47	2.59	-0.16	2.83	2.46	-5.14	0.00373	7.24e-06	Moderately soluble	-6.49	0.000166	3.22e-07	Poorly soluble	-4.56	0.0142	2.76e-05	Moderately soluble	Low	No	Yes	No	No	No	No	Yes	-6.97	1	2	1	1	1	0.55	0	1	1	5.93
XLGB-124	COc1ccc(cc1)c1oc2c(CC=C(C)C)c(O[C@@H]3O[C@H](CO)[C@H]([C@@H]([C@H]3O)O)O)cc(c2c(=O)c1O[C@@H]1O[C@@H](C)[C@@H]([C@H]([C@H]1O)O)O[C@@H]1O[C@@H](C)[C@@H]([C@H]([C@H]1O)O)O)O	C39H50O19	822.8	58	16	0.56	11	19	10	198.51	297.12	4.08	0.57	-1.08	-3.78	-0.71	-0.18	-4.78	0.0137	1.66e-05	Moderately soluble	-6.38	0.000341	4.15e-07	Poorly soluble	-1.47	27.9	0.034	Soluble	Low	No	Yes	No	No	No	No	No	-10.91	3	4	2	1	4	0.17	0	1	2	8.34
XLGB-125	CC(Cc1occ(c1)[C@H]1CC=C([C@@H](C1)O)C)C	C15H22O2	234.33	17	5	0.6	3	2	1	70.48	33.37	3.13	2.98	3.66	2.49	3.56	3.16	-3.19	0.151	0.000646	Soluble	-3.34	0.106	0.000453	Soluble	-3.62	0.0569	0.000243	Soluble	High	Yes	No	No	No	No	Yes	No	-5.61	0	0	0	0	0	0.55	0	1	1	4.05
XLGB-126	COc1ccc(cc1c1c(O)cc(c2c1oc(cc2=O)c1ccc(cc1)O)O)c1cc(=O)c2c(o1)cc(cc2O)O	C31H20O10	552.48	41	32	0.03	4	10	5	151.44	170.8	3.39	5.36	5.44	0.44	5.16	3.96	-6.96	6.12e-05	1.11e-07	Poorly soluble	-8.7	1.1e-06	1.99e-09	Poorly soluble	-9.39	2.26e-07	4.08e-10	Poorly soluble	Low	No	No	No	No	Yes	No	No	-5.86	1	2	1	1	2	0.55	0	0	2	4.35
XLGB-127	COc1ccc(cc1)c1oc2c(CCC(OC)(C)C)c(O)cc(c2c(=O)c1O)O	C22H24O7	400.42	29	16	0.32	6	7	3	110.61	109.36	3.54	3.93	3.94	0.81	4.23	3.29	-4.81	0.00619	1.55e-05	Moderately soluble	-5.93	0.000475	1.19e-06	Moderately soluble	-6.21	0.000245	6.12e-07	Poorly soluble	High	No	No	No	No	Yes	Yes	No	-5.95	0	0	0	0	0	0.55	0	0	2	3.9
XLGB-128	COc1ccc(cc1)c1oc2c(CC=C(C)C)c(O[C@H]3O[C@H](CO)[C@H]([C@@H]([C@H]3O)O)O)cc(c2c(=O)c1O[C@@H]1O[C@H](C)[C@H]([C@@H]([C@@H]1O)O[C@H]1O[C@@H](COC(=O)C)[C@H]([C@@H]([C@@H]1O)O)OC(=O)C)OC(=O)C)O	C45H56O23	964.91	68	16	0.56	18	23	8	228.88	335.56	4.27	1.24	-0.4	-3.39	0.35	0.42	-5.59	0.00248	2.57e-06	Moderately soluble	-7.88	1.26e-05	1.3e-08	Poorly soluble	-2.62	2.3	0.00239	Soluble	Low	No	Yes	No	No	No	No	No	-11.31	3	3	2	1	5	0.17	0	2	2	9.01
XLGB-129	OC[C@H]1O[C@@H](Oc2cc(O)c3c(c2CCC(OC)(C)C)oc(c(c3=O)O)c2ccc(cc2)OC)[C@H]([C@H]([C@@H]1O)O)O	C28H34O12	562.56	40	16	0.46	9	12	6	142.73	188.51	3.12	2.13	1.42	-1.4	2.2	1.49	-4.37	0.0239	4.25e-05	Moderately soluble	-5.72	0.00107	1.9e-06	Moderately soluble	-4.43	0.0207	3.67e-05	Moderately soluble	Low	No	Yes	No	No	No	No	Yes	-8.22	3	3	1	1	3	0.17	0	0	2	6.18
XLGB-130	COc1ccc(cc1)c1oc2c(CC=C(C)C)c(O[C@@H]3O[C@H](CO)[C@H]([C@@H]([C@H]3O)O)O)cc(c2c(=O)c1O[C@H]1O[C@@H](C)[C@@H]([C@H]([C@H]1O[C@@H]1O[C@H](C)[C@H]([C@@H]([C@H]1O)O)O)O)O)O	C39H50O19	822.8	58	16	0.56	11	19	10	198.51	297.12	4	0.57	-1.08	-3.78	-0.71	-0.2	-4.78	0.0137	1.66e-05	Moderately soluble	-6.38	0.000341	4.15e-07	Poorly soluble	-1.47	27.9	0.034	Soluble	Low	No	Yes	No	No	No	No	No	-10.91	3	4	2	1	4	0.17	0	1	2	8.35
XLGB-131	CC(=O)CCCCCCCCCCCCC(=O)C	C16H30O2	254.41	18	0	0.88	13	2	0	79.43	34.14	3.66	4.65	4.85	3.27	5.4	4.37	-3.49	0.0825	0.000324	Soluble	-5.09	0.00205	8.06e-06	Moderately soluble	-5.41	0.000981	3.85e-06	Moderately soluble	High	Yes	No	Yes	No	No	No	No	-4.55	0	0	1	0	0	0.55	0	0	2	2.22
XLGB-132	COc1ccc(cc1)c1oc2c(CC=C(C)C)c(ccc2c(=O)c1O[C@@H]1OC[C@H]([C@@H]([C@H]1O[C@@H]1O[C@@H](C)[C@@H]([C@H]([C@H]1O)O)O)O)O)O[C@@H]1O[C@H](CO)[C@H]([C@@H]([C@H]1O)O)O	C38H48O18	792.78	56	16	0.55	11	18	9	191.68	276.89	3.59	-0.06	-1.17	-3.5	-0.38	-0.3	-4.2	0.0497	6.27e-05	Moderately soluble	-5.3	0.00394	4.97e-06	Moderately soluble	-1.94	9.21	0.0116	Soluble	Low	No	Yes	No	No	No	No	No	-11.18	3	4	2	1	4	0.17	0	1	2	8.1
XLGB-133	COc1ccc(cc1)c1oc2c(CC=C(C)C)c(O)ccc2c(=O)c1O	C21H20O5	352.38	26	16	0.19	4	5	2	102.18	79.9	3.19	4.58	4.39	1.86	4.75	3.75	-5.1	0.00279	7.92e-06	Moderately soluble	-5.98	0.000367	1.04e-06	Moderately soluble	-6.33	0.000163	4.63e-07	Poorly soluble	High	No	No	No	Yes	Yes	No	Yes	-5.2	0	0	0	0	0	0.55	0	1	2	3.73
XLGB-134	COc1ccc(cc1)c1oc2c(CC=C(C)C)c(ccc2c(=O)c1O[C@@H]1O[C@@H](C)[C@@H](C[C@H]1O[C@@H]1O[C@@H](C)[C@@H]([C@H]([C@H]1O)O)O)O)O[C@@H]1O[C@H](CO)[C@H]([C@@H]([C@H]1O)O)O	C39H50O17	790.8	56	16	0.56	11	17	8	195.32	256.66	4.1	1.35	0.24	-2.6	0.64	0.74	-5.08	0.00659	8.34e-06	Moderately soluble	-6.34	0.00036	4.55e-07	Poorly soluble	-2.9	0.993	0.00126	Soluble	Low	No	Yes	No	No	No	No	No	-10.17	3	3	2	1	4	0.17	0	1	2	8.19
XLGB-135	O=c1cc(O)c(c(o1)C)O	C6H6O4	142.11	10	6	0.17	0	4	2	33.99	70.67	1.14	-0.12	0.36	-0.61	0.87	0.33	-1.09	11.6	0.0814	Very soluble	-0.91	17.5	0.123	Very soluble	-1.15	10.1	0.0713	Soluble	High	No	No	No	No	No	No	No	-7.25	0	3	0	0	1	0.55	0	0	1	2.74
XLGB-136	OC[C@H]1O[C@@H](Oc2cc(O)c3c(c2CC=C(C)C)O[C@H]([C@@H](C3=O)O)c2ccc(cc2)O)[C@@H]([C@H]([C@@H]1O)O)O	C26H30O11	518.51	37	12	0.42	6	11	7	128.57	186.37	1.78	1.96	0.14	-1.2	0.8	0.69	-4.13	0.0381	7.35e-05	Moderately soluble	-5.5	0.00164	3.17e-06	Moderately soluble	-2.08	4.32	0.00834	Soluble	Low	No	Yes	No	No	No	No	No	-8.07	3	1	1	1	3	0.17	0	1	1	5.78
XLGB-137	OC[C@H]1O[C@@H](Oc2cc(O)c3c(c2CC=C(C)C)oc(c(c3=O)O)c2ccc(cc2)O)[C@H]([C@H]([C@@H]1O)O)O	C26H28O11	516.49	37	16	0.35	6	11	7	131.85	190.28	2.51	2.64	1.26	-1.12	1.68	1.39	-4.63	0.0121	2.35e-05	Moderately soluble	-6.29	0.000267	5.17e-07	Poorly soluble	-3.3	0.261	0.000505	Soluble	Low	No	Yes	No	No	No	No	No	-7.58	3	2	1	1	3	0.17	0	1	1	5.85
XLGB-138	OC[C@H]1O[C@@H](Oc2cc(O)c3c(c2CC=C(C)C)oc(c(c3=O)O[C@@H]2OC[C@H]([C@H]([C@@H]2O[C@H]2O[C@@H](C)[C@@H]([C@H]([C@@H]2O)O)O)O)O)c2ccc(cc2)O)[C@@H]([C@H]([C@@H]1O)O)O	C37H46O19	794.75	56	16	0.54	10	19	11	189.23	308.12	2.03	-0.19	-1.77	-4.13	-1.41	-1.09	-4.2	0.0502	6.32e-05	Moderately soluble	-5.82	0.00119	1.5e-06	Moderately soluble	-0.66	176	0.221	Soluble	Low	No	Yes	No	No	No	No	No	-11.28	3	4	1	1	4	0.17	0	1	2	8.05
XLGB-139	OC[C@H]1O[C@@H](Oc2cc(O)c3c(c2CC=C(C)C)oc(c(c3=O)O[C@H]2O[C@@H](C)[C@@H]([C@H]([C@@H]2O[C@H]2OC[C@H]([C@H]([C@@H]2O)O)O)O)O)c2ccc(cc2)O)[C@@H]([C@H]([C@@H]1O)O)O	C37H46O19	794.75	56	16	0.54	10	19	11	189.23	308.12	2.52	-0.19	-1.77	-4.13	-1.41	-1	-4.2	0.0502	6.32e-05	Moderately soluble	-5.82	0.00119	1.5e-06	Moderately soluble	-0.66	176	0.221	Soluble	Low	No	Yes	No	No	No	No	No	-11.28	3	4	1	1	4	0.17	0	1	2	8.05
XLGB-140	COc1ccc(cc1)c1oc2c(CC=C(C)C)c(O)cc(c2c(=O)c1O[C@H]1O[C@H](C)[C@@H]([C@@H]([C@@H]1O)O[C@H]1O[C@@H](COC(=O)C)[C@H]([C@@H]([C@@H]1O)O)O)OC(=O)C)O	C37H44O17	760.74	54	16	0.49	13	17	6	187.02	250.34	4.65	2.47	1.56	-1.61	1.85	1.79	-5.47	0.00255	3.36e-06	Moderately soluble	-7.37	3.23e-05	4.25e-08	Poorly soluble	-3.92	0.0921	0.000121	Soluble	Low	No	Yes	No	No	No	No	No	-9.19	3	3	2	1	4	0.17	0	2	2	7.59
XLGB-141	Oc1ccc(c(c1)O)C(=O)O	C7H6O4	154.12	11	6	0	1	4	3	37.45	77.76	0.75	1.63	0.8	0.4	0.26	0.77	-2.16	1.07	0.00692	Soluble	-2.88	0.205	0.00133	Soluble	-0.6	38.3	0.248	Soluble	High	No	No	No	No	No	No	Yes	-6.08	0	3	0	0	1	0.56	0	0	1	1.1
XLGB-142	C[C@@H]1CC[C@H]2[C@@H]1[C@H]1[C@H](C1(C)C)CC[C@]2(C)O	C15H26O	222.37	16	0	1	0	1	1	68.82	20.23	3.11	3.74	3.47	3.81	3	3.43	-3.57	0.0592	0.000266	Soluble	-3.86	0.0309	0.000139	Soluble	-2.73	0.41	0.00185	Soluble	High	Yes	No	No	Yes	No	No	No	-5	0	0	0	0	1	0.55	0	0	2	3.58
XLGB-143	CCCCCCCCCCCCCCCCCCCCCCCCC[C@@H](CCCCC)O	C31H64O	452.84	32	0	1	28	1	1	152.29	20.23	7.95	15.11	11.31	7.65	12.11	10.83	-10.32	2.17e-08	4.8e-11	Insoluble	-15.66	1e-13	2.21e-16	Insoluble	-11.33	2.1e-09	4.63e-12	Insoluble	Low	No	Yes	No	No	No	No	No	1.67	1	3	1	1	3	0.55	0	0	3	4.55
XLGB-144	COc1ccc(cc1)c1oc2c(CC=C(C)C)c(O[C@H]3O[C@H](CO)[C@@H]([C@@H]([C@H]3O)O)O)cc(c2c(=O)c1O[C@@H]1O[C@H](C)[C@@H]([C@@H]([C@H]1O)O[C@@H]1O[C@@H](C)[C@@H]([C@H]([C@@H]1O)O)O)O)O	C39H50O19	822.8	58	16	0.56	11	19	10	198.51	297.12	3.98	0.57	-1.08	-3.78	-0.71	-0.2	-4.78	0.0137	1.66e-05	Moderately soluble	-6.38	0.000341	4.15e-07	Poorly soluble	-1.47	27.9	0.034	Soluble	Low	No	Yes	No	No	No	No	No	-10.91	3	4	2	1	4	0.17	0	1	2	8.32
XLGB-145	OC[C@H]1O[C@@H](Oc2cc(O)c3c(c2CC=C(C)C)oc(c(c3=O)O[C@@H]2O[C@H](CO)[C@H]([C@@H]([C@@H]2O)O)O)c2ccc(cc2)O)[C@H]([C@H]([C@@H]1O)O)O	C32H38O16	678.63	48	16	0.47	9	16	10	163.98	269.43	1.91	0.84	-1.26	-3.27	-0.39	-0.43	-4.23	0.04	5.9e-05	Moderately soluble	-6.08	0.000563	8.3e-07	Poorly soluble	-1.48	22.5	0.0332	Soluble	Low	No	Yes	No	No	No	No	No	-9.84	3	4	1	1	4	0.17	0	1	2	7.15
XLGB-146	COc1ccc(cc1)c1oc2c(CC=C(C)C)c(O[C@@H]3O[C@H](CO)[C@H]([C@@H]([C@H]3O)O)O)cc(c2c(=O)c1O[C@@H]1O[C@H](C)[C@@H]([C@@H]([C@H]1O)O[C@H]1O[C@@H](CO)[C@H]([C@H]([C@@H]1O)O)O)O)O	C39H50O20	838.8	59	16	0.56	12	20	11	199.67	317.35	3.71	0.07	-2.11	-4.5	-1.3	-0.83	-4.49	0.0269	3.21e-05	Moderately soluble	-6.29	0.000432	5.15e-07	Poorly soluble	-0.89	109	0.13	Soluble	Low	No	Yes	No	No	No	No	No	-11.37	3	4	2	1	4	0.17	0	1	2	8.36
XLGB-147	OC[C@@H]1[C@H](O[C@@H]([C@H]1CO)c1cc(OC)c(c(c1)OC)O)c1cc(OC)c(c(c1)OC)O	C22H28O9	436.45	31	12	0.45	8	9	4	111.24	127.07	2.89	1.23	1.51	-0.22	2.13	1.51	-3.08	0.364	0.000833	Soluble	-3.5	0.139	0.000319	Soluble	-3.75	0.0774	0.000177	Soluble	High	No	Yes	No	No	No	No	No	-8.09	0	0	0	0	0	0.55	0	0	2	4.5
XLGB-148	COc1ccc(cc1)c1oc2c(CC=C(C)C)c(O[C@@H]3O[C@H](CO)[C@H]([C@@H]([C@H]3O)O)O)cc(c2c(=O)c1O[C@H]1O[C@@H](C)[C@@H]([C@H]([C@H]1O)O)O)O	C33H40O15	676.66	48	16	0.48	9	15	8	167.28	238.2	3.08	1.66	0.07	-2.35	0.77	0.65	-4.73	0.0125	1.85e-05	Moderately soluble	-6.28	0.000358	5.3e-07	Poorly soluble	-2.74	1.23	0.00181	Soluble	Low	No	Yes	No	No	No	No	No	-9.25	3	3	1	1	4	0.17	0	1	2	7.24
XLGB-149	COc1cc(ccc1O)C[C@@]1(O)CO[C@H]([C@]1(CO)CC(=O)O)c1ccc(c(c1)OC)O	C22H26O9	434.44	31	12	0.41	8	9	5	109.42	145.91	2.05	1.25	1.29	-0.03	2.22	1.36	-3.08	0.362	0.000833	Soluble	-3.91	0.0531	0.000122	Soluble	-3.94	0.0493	0.000114	Soluble	Low	No	Yes	No	No	No	No	No	-8.06	0	0	1	1	0	0.56	0	0	2	4.34
XLGB-150	OC[C@H]1O[C@@H](Oc2cc3ccc4c(c3c(c2OC)OC)cc(c(c4)O)OC)[C@@H]([C@H]([C@@H]1O)O)O	C23H26O10	462.45	33	14	0.39	6	10	5	117.1	147.3	2.69	1.82	0.9	-0.8	1.04	1.13	-3.77	0.0782	0.000169	Soluble	-4.53	0.0136	2.93e-05	Moderately soluble	-3.24	0.265	0.000574	Soluble	Low	No	Yes	No	No	No	No	No	-7.83	0	0	1	1	0	0.55	0	1	1	5.18
XLGB-151	COc1cc2c(cc1O)ccc1c2c(OC)c(c(c1)O)OC	C17H16O5	300.31	22	14	0.18	3	5	2	84.98	68.15	2.95	3.63	3.43	1.78	3.1	2.98	-4.26	0.0164	5.47e-05	Moderately soluble	-4.75	0.00535	1.78e-05	Moderately soluble	-4.97	0.00321	1.07e-05	Moderately soluble	High	Yes	No	Yes	Yes	Yes	Yes	Yes	-5.55	0	0	0	0	0	0.55	0	1	1	2
XLGB-152	OC[C@H]1O[C@@H](O[C@@H](C(O)(C)C)CC/C(=C/CC[C@](C=C)(O)C)/C)[C@@H]([C@H]([C@@H]1O)O)O	C21H38O8	418.52	29	0	0.81	11	8	6	109.22	139.84	2.79	0.7	0.39	-0.51	1.31	0.93	-2.15	2.96	0.00708	Soluble	-3.21	0.256	0.000611	Soluble	-0.31	206	0.493	Soluble	High	No	Yes	No	No	No	No	No	-8.36	1	0	1	1	1	0.55	0	1	2	6.01
XLGB-153	OC[C@@H]1O[C@@H](Oc2cc(O)c3c(c2CC=C(C)C)oc(c(c3=O)O)c2ccc(cc2)OC)[C@@H]([C@H]([C@@H]1O)O)O	C27H30O11	530.52	38	16	0.37	7	11	6	136.32	179.28	3.38	2.97	1.57	-0.92	2.23	1.85	-4.85	0.0075	1.41e-05	Moderately soluble	-6.4	0.000212	4e-07	Poorly soluble	-3.98	0.0552	0.000104	Soluble	Low	No	Yes	No	No	No	No	No	-7.43	3	2	1	1	3	0.17	0	1	1	5.97
XLGB-154	COc1ccc(cc1)c1oc2c(CC=C(C)C)c(O)cc(c2c(=O)c1O[C@@H]1O[C@H](C)[C@@H]([C@@H]([C@@H]1O)O)O)O	C27H30O10	514.52	37	16	0.37	6	10	5	135.16	159.05	3.95	3.47	2.59	-0.16	2.83	2.54	-5.14	0.00373	7.24e-06	Moderately soluble	-6.49	0.000166	3.22e-07	Poorly soluble	-4.56	0.0142	2.76e-05	Moderately soluble	Low	No	Yes	No	No	No	No	Yes	-6.97	1	2	1	1	1	0.55	0	1	1	5.93
XLGB-155	CC(=CCc1c(O)cc(c2c1oc(c1ccc(cc1)O)c(c2=O)O[C@@H]1O[C@@H](C)[C@@H]([C@H]([C@H]1O)O)O)O)C	C26H28O10	500.49	36	16	0.35	5	10	6	130.69	170.05	2.36	3.14	2.29	-0.36	2.27	1.94	-4.92	0.00602	1.2e-05	Moderately soluble	-6.38	0.000208	4.16e-07	Poorly soluble	-3.87	0.0671	0.000134	Soluble	Low	No	Yes	No	No	No	No	Yes	-7.12	2	2	1	1	2	0.17	0	1	1	5.82
XLGB-156	OC[C@H]1O[C@@H](Oc2c(oc3c(c2=O)c(O)cc(c3CC=C(C)C)O)c2ccc(cc2)O)[C@@H]([C@H]([C@@H]1O)O)O[C@@H]1O[C@@H](C)[C@@H]([C@H]([C@H]1O)O)O	C32H38O15	662.64	47	16	0.47	8	15	9	163.08	249.2	2.89	1.55	0.12	-2.53	0.2	0.45	-4.65	0.0149	2.25e-05	Moderately soluble	-6.39	0.000268	4.05e-07	Poorly soluble	-2.06	5.78	0.00873	Soluble	Low	No	Yes	No	No	No	No	No	-9.24	3	3	1	1	4	0.17	0	1	2	7.08
XLGB-157	OC[C@H]1C[C@@H](Oc2cc(O)c3c(c2CC=C(C)C)oc(c(c3=O)O[C@H]2O[C@@H](C)[C@@H]([C@H]([C@H]2O[C@H]2O[C@H](CO)[C@H]([C@@H]([C@H]2O)O)O)O)O)c2ccc(cc2)O)[C@@H]([C@H]([C@@H]1O)O)O	C39H50O19	822.8	58	16	0.56	11	19	12	198.92	319.12	4.03	0.34	-1.75	-4.18	-1.22	-0.56	-4.63	0.0191	2.32e-05	Moderately soluble	-6.61	0.000204	2.48e-07	Poorly soluble	-0.75	147	0.179	Soluble	Low	No	Yes	No	No	No	No	No	-11.08	3	4	2	1	4	0.17	0	1	2	8.33
XLGB-158	CC(=CCc1c(O)cc(c2c1oc(c1ccc(cc1)O)c(c2=O)O[C@@H]1OC[C@H]([C@@H]([C@H]1O[C@@H]1O[C@@H](C)[C@@H]([C@H]([C@H]1O)O)O)O)O)O)C	C31H36O14	632.61	45	16	0.45	7	14	8	157.11	228.97	3.25	1.61	0.76	-1.98	0.67	0.86	-4.58	0.0167	2.64e-05	Moderately soluble	-6.03	0.00059	9.33e-07	Poorly soluble	-2.5	1.99	0.00314	Soluble	Low	No	Yes	No	No	No	No	No	-9.02	3	3	1	1	4	0.17	0	1	1	6.86
XLGB-159	CC[C@H](C(C)C)CC[C@@H]([C@H]1CC[C@H]2[C@]1(C)CC[C@H]1[C@H]2[C@H](O)C=C2[C@@]1(C)CC[C@H](C2)O)C	C29H50O2	430.71	31	0	0.93	6	2	2	134.39	40.46	4.78	8.23	7	5.8	6.15	6.39	-7.3	2.16e-05	5.02e-08	Poorly soluble	-8.94	4.93e-07	1.15e-09	Poorly soluble	-5.37	0.00185	4.3e-06	Moderately soluble	Low	No	No	No	No	No	No	No	-3.08	1	3	0	1	1	0.55	0	1	2	6.42
XLGB-160	Oc1ccc(cc1)c1oc2cc(O[C@@H]3O[C@@H](C)[C@@H]([C@H]([C@H]3O)O)O)cc(c2c(=O)c1O[C@@H]1O[C@@H](C)[C@@H]([C@H]([C@H]1O)O)O)O	C27H30O14	578.52	41	16	0.44	5	14	8	137.93	228.97	2.44	-0.09	-0.72	-2.69	-1.04	-0.42	-3.33	0.271	0.000469	Soluble	-4.27	0.0313	5.42e-05	Moderately soluble	-1.46	19.9	0.0344	Soluble	Low	No	Yes	No	No	No	No	No	-9.89	3	4	1	1	3	0.17	0	0	1	6.48
XLGB-161	COc1ccc(cc1)[C@@H]1Oc2c(C(=O)[C@@H]1O[C@H]1O[C@@H](C)[C@@H]([C@H]([C@@H]1O)O[C@H]1O[C@@H](OC(=O)C)[C@@H]([C@H]([C@@H]1O)O)O)OC(=O)C)c(O)cc(c2CC=C(C)C)O	C36H44O17	748.72	53	12	0.53	12	17	6	179.19	246.43	4.34	2.1	0.74	-1.47	0.55	1.25	-5.18	0.00494	6.6e-06	Moderately soluble	-6.91	9.31e-05	1.24e-07	Poorly soluble	-2.32	3.62	0.00483	Soluble	Low	No	Yes	No	No	No	No	No	-9.38	3	3	2	1	4	0.17	0	2	2	7.3
XLGB-162	OC[C@H]1O[C@@H](Oc2cc(O)c3c(c2CC=C(C)C)oc(c(c3=O)O[C@@H]2O[C@@H](C)[C@@H]([C@H]([C@@H]2O)O[C@H]2O[C@H](COC(=O)C)[C@H]([C@@H]([C@H]2OC(=O)C)O)O)OC(=O)C)c2ccc(cc2)OC)[C@@H]([C@H]([C@@H]1O)O)O	C45H56O23	964.91	68	16	0.56	18	23	8	228.88	335.56	5.17	1.24	-0.4	-3.39	0.35	0.6	-5.59	0.00248	2.57e-06	Moderately soluble	-7.88	1.26e-05	1.3e-08	Poorly soluble	-2.62	2.3	0.00239	Soluble	Low	No	Yes	No	No	No	No	No	-11.31	3	3	2	1	5	0.17	0	2	2	9.01
XLGB-163	OP(=O)(O)O	H3O4P	98	5	0	0.56	0	23	8	14.26	87.57	5.17	1.24	-0.4	-3.39	0.35	0.6	-5.59	0.00248	2.57e-06	Moderately soluble	-7.88	1.26e-05	1.3e-08	Poorly soluble	-2.62	2.3	0.00239	Soluble	Low	No	Yes	No	No	No	No	No	-11.31	3	3	2	1	5	0.17	0	2	2	9.01
XLGB-164	CCO[C@@H]1O[C@H](CO)[C@@H]([C@@H]([C@H]1O)O)O	C8H16O6	208.21	14	0	1	3	6	4	45.27	99.38	2.09	-2.28	-2.18	-2.07	-1.52	-1.19	0.5	664	3.19	Highly soluble	0.73	1110	5.34	Highly soluble	1.5	6580	31.6	Soluble	High	No	Yes	No	No	No	No	No	-9.19	0	1	0	0	1	0.55	0	0	1	4.41
XLGB-165	NCC(=O)O	C2H5NO2	75.07	5	0	0.5	1	3	2	16.21	63.32	0.37	-3.21	-0.97	-3.58	-1.04	-1.69	1.78	4550	60.7	Highly soluble	2.45	21200	282	Highly soluble	0.83	510	6.79	Soluble	High	No	No	No	No	No	No	No	-9.04	0	4	0	0	3	0.55	0	0	1	1
XLGB-166	O=C[C@@H]([C@H]([C@@H]([C@@H](CO[C@H]1O[C@H](CO[C@H]2O[C@H](CO)[C@@H]([C@@H]([C@H]2O)O)O)[C@@H]([C@@H]([C@H]1O)O)O)O)O)O)O	C18H32O16	504.44	34	0	0.94	11	16	11	101.73	276.52	-0.8	-7.17	-7.73	-6.71	-5.23	-5.53	2.28	95100	189	Highly soluble	2.08	61000	121	Highly soluble	5.84	347000000	687000	Soluble	Low	No	Yes	No	No	No	No	No	-14.47	3	2	2	1	4	0.17	0	1	2	6.28
XLGB-167	OC[C@H]([C@H]([C@@H]([C@@H](CO)O)O)O)O	C6H14O6	182.17	12	0	1	5	6	6	37.93	121.38	0.23	-3.1	-3.59	-2.77	-1.91	-2.23	1.31	3750	20.6	Highly soluble	1.12	2380	13.1	Highly soluble	2.57	67100	368	Soluble	Low	No	No	No	No	No	No	No	-9.61	1	2	0	0	3	0.55	0	0	1	3.3
XLGB-168	C[C@@H](C(=O)O)N	C3H7NO2	89.09	6	0	0.67	1	3	2	21.01	63.32	0.34	-2.96	-0.58	-3.06	-1.04	-1.46	1.54	3080	34.5	Highly soluble	2.19	13800	155	Highly soluble	0.77	523	5.87	Soluble	High	No	No	No	No	No	No	No	-8.95	0	4	0	0	3	0.55	0	0	1	1
XLGB-169	OC[C@H]([C@@H]([C@@H]([C@H](C=O)O)O)O)O	C6H12O6	180.16	12	0	0.83	5	6	5	36.96	118.22	0	-2.94	-3.38	-2.91	-1.6	-2.17	1.23	3030	16.8	Highly soluble	1.02	1870	10.4	Highly soluble	2.45	50500	281	Soluble	Low	No	No	No	No	No	No	No	-9.49	0	2	0	0	2	0.55	0	1	1	3.31
XLGB-170	CC[C@@H](C(C)C)CC[C@H]([C@H]1CCC2[C@]1(C)CCC1C2CC=C2[C@]1(C)CCC(C2)O[C@@H]1O[C@H](CO)[C@H]([C@@H]([C@H]1O)O)O)C	C35H60O6	576.85	41	0	0.94	9	6	4	165.61	99.38	5.17	7.74	5.85	3.96	5.02	5.55	-7.7	1.15e-05	2e-08	Poorly soluble	-9.67	1.23e-07	2.14e-10	Poorly soluble	-4.4	0.0228	3.94e-05	Moderately soluble	Low	No	No	No	No	No	No	No	-4.32	1	4	0	0	1	0.55	0	1	3	8.02
XLGB-171	C[C@H]([C@@H](C(=O)O)N)O	C4H9NO3	119.12	8	0	0.75	2	4	3	26.98	83.55	0.33	-2.94	-1.22	-3.46	-1.36	-1.73	1.41	3030	25.4	Highly soluble	1.75	6620	55.6	Highly soluble	1.25	2100	17.6	Soluble	High	No	No	No	No	No	No	No	-9.11	0	4	0	0	3	0.55	0	0	1	1.79
XLGB-172	OC[C@@H]1O[C@H](O[C@@H]2OC=C[C@H]3[C@@H]2[C@@](C)(O)CC3OC(=O)C=Cc2ccc(c(c2)OC)O)[C@@H]([C@H]([C@@H]1O)O)O	C25H32O12	524.51	37	6	0.56	8	12	6	125.53	184.6	3.2	0.09	-0.71	-1.73	-0.9	-0.01	-2.74	0.953	0.00182	Soluble	-3.52	0.158	0.000301	Soluble	0.29	1010	1.93	Soluble	Low	No	Yes	No	No	No	No	No	-9.44	3	2	1	1	3	0.17	0	1	2	6.25
XLGB-173	OC[C@H]1O[C@@H](O[C@H]2OC=C([C@H]3[C@@H]2[C@@H](C)[C@@H](C3)O)C(=O)O)[C@@H]([C@H]([C@@H]1O)O)O	C16H24O10	376.36	26	0	0.81	4	10	6	83.05	166.14	1.82	-1.71	-2.24	-2	-2.72	-1.37	-0.83	55.4	0.147	Very soluble	-1.27	20.4	0.0542	Very soluble	2.61	154000	410	Soluble	Low	No	Yes	No	No	No	No	No	-9.81	1	1	1	1	2	0.11	0	0	1	5.69
XLGB-174	N[C@H](C(=O)O)Cc1ccccc1	C9H11NO2	165.19	12	6	0.22	3	3	2	45.5	63.32	1.08	-1.52	0.64	-1.11	0.86	-0.01	-0.08	138	0.835	Very soluble	0.7	821	4.97	Highly soluble	-1.86	2.3	0.0139	Soluble	High	No	No	No	No	No	No	No	-8.39	0	0	0	0	1	0.55	0	0	1	1.46
XLGB-175	OC[C@H]([C@H]([C@@H](C(=O)CO)O)O)O	C6H12O6	180.16	12	0	0.83	5	6	5	36.96	118.22	0.43	-3.24	-3.38	-2.91	-1.59	-2.14	1.41	4680	26	Highly soluble	1.33	3840	21.3	Highly soluble	2.09	22300	124	Soluble	Low	No	No	No	No	No	No	No	-9.7	0	2	0	0	2	0.55	0	0	1	3.13
XLGB-176	N[C@H](C(=O)O)Cc1c[nH]cn1	C6H9N3O2	155.15	11	5	0.33	3	4	3	37.65	92	-0.13	-3.56	-0.64	-3.74	-0.06	-1.63	1.3	3110	20.1	Highly soluble	2.21	25200	163	Highly soluble	-0.69	31.8	0.205	Soluble	High	No	No	No	No	No	No	No	-9.77	0	3	0	0	2	0.55	0	0	1	2.29
XLGB-177	OC[C@@H]1O[C@H](OC2OC=C[C@H]3[C@@H]2[C@@](C)(O)CC3OC(=O)c2ccc(c(c2)OC)O)[C@@H]([C@H]([C@@H]1O)O)O	C23H30O12	498.48	35	6	0.61	7	12	6	115.82	184.6	0.69	-0.34	-1	-1.8	-1.52	-0.79	-2.38	2.07	0.00416	Soluble	-3.07	0.419	0.000841	Soluble	0.35	1110	2.22	Soluble	Low	No	No	No	No	No	No	No	-9.58	2	2	1	1	3	0.17	0	0	1	5.96
XLGB-178	OC[C@H]1O[C@@H](O[C@H]2OC=C([C@H]3[C@@H]2C(=CC3)CO)C(=O)OC)[C@@H]([C@H]([C@@H]1O)O)O	C17H24O10	388.37	27	0	0.71	6	10	5	86.89	155.14	2.01	-2.34	-2.23	-1.86	-1.91	-1.27	-0.38	163	0.419	Very soluble	-0.38	162	0.416	Very soluble	1.69	19100	49.1	Soluble	Low	No	No	No	No	No	No	No	-10.33	0	1	1	1	2	0.11	0	1	1	5.8
XLGB-179	OCC1=CC([C@@H]2[C@H]1C(OC=C2)O[C@H]1O[C@@H](CO)[C@H]([C@@H]([C@H]1O)O)O)O	C15H22O9	346.33	24	0	0.73	4	9	6	77.15	149.07	1.5	-3.02	-2.8	-2.7	-2.78	-1.96	0.18	523	1.51	Highly soluble	0.45	981	2.83	Highly soluble	2.76	200000	577	Soluble	Low	No	Yes	No	No	No	No	No	-10.56	1	1	1	1	2	0.55	0	1	0	5.79
XLGB-180	NC[CH][CH]C(=O)O	C4H7NO2	101.1	7	0	0.75	3	3	2	23.71	63.32	0	-3.17	-0.56	-0.39	-0.56	-0.94	1.73	5410	53.5	Highly soluble	2.41	25900	256	Highly soluble	-0.04	93.3	0.923	Soluble	High	No	No	No	No	No	No	No	-9.17	0	4	0	0	3	0.55	0	0	1	1
XLGB-181	OC[C@H]1O[C@@H](OC2OC=CC3C2C(C)(O)CC3O)[C@@H]([C@H]([C@@H]1O)O)O	C15H24O9	348.35	24	0	0.87	3	9	6	77.67	149.07	1.26	-2.19	-2.58	-2.59	-2.66	-1.75	-0.42	132	0.378	Very soluble	-0.41	136	0.39	Very soluble	2.54	121000	348	Soluble	Low	No	Yes	No	No	No	No	No	-9.98	1	1	1	1	2	0.55	0	0	0	5.74
XLGB-182	OC[C@@H]1O[C@H](OC2OC=C[C@H]3[C@@H]2[C@@](C)(O)CC3O)[C@@H]([C@H]([C@@H]1O)O)O	C15H24O9	348.35	24	0	0.87	3	9	6	77.67	149.07	1.18	-2.19	-2.58	-2.59	-2.66	-1.77	-0.42	132	0.378	Very soluble	-0.41	136	0.39	Very soluble	2.54	121000	348	Soluble	Low	No	Yes	No	No	No	No	No	-9.98	1	1	1	1	2	0.55	0	0	0	5.74
XLGB-183	OC[C@H]([C@H]([C@@H]([C@H](C=O)N)O)O)O	C6H13NO5	179.17	12	0	0.83	5	6	5	38.51	124.01	0.78	-3.69	-3.41	-2.91	-1.84	-2.22	1.7	9060	50.6	Highly soluble	1.67	8450	47.2	Highly soluble	2.23	30600	171	Soluble	Low	No	No	No	No	No	No	No	-10.01	0	2	0	0	2	0.55	0	1	1	3.05
XLGB-184	OC[C@@]1(O)O[C@H](OC2OC=C[C@@H]3[C@H]2[C@](C)(CC3)OC(=O)C)[C@@H]([C@H]([C@@H]1O)O)O	C17H26O10	390.38	27	0	0.82	5	10	5	87.44	155.14	1.24	-1.41	-1.66	-1.76	-1.79	-1.08	-1.04	35.4	0.0908	Very soluble	-1.35	17.6	0.0451	Very soluble	1.47	11600	29.6	Soluble	Low	No	Yes	No	No	No	No	No	-9.68	0	1	1	1	1	0.55	0	0	1	5.62
XLGB-185	COC(=O)C1=CO[C@@H]([C@@H]2[C@H]1CCC2=C)O[C@@H]1O[C@H](CO[C@@H]2O[C@@H](C)[C@@H]([C@H]([C@H]2O)O)O)[C@H]([C@@H]([C@H]1O)O)O	C23H34O13	518.51	36	0	0.78	7	13	6	116.95	193.83	3.17	-2.5	-2.35	-2.36	-2.5	-1.31	-1.02	49.8	0.096	Very soluble	-1.03	48.7	0.0939	Very soluble	2.06	59900	116	Soluble	Low	No	No	No	No	No	No	No	-11.24	3	2	1	1	4	0.11	0	1	1	6.75
XLGB-186	NCCCC[C@@H](C(=O)O)N	C6H14N2O2	146.19	10	0	0.83	5	4	3	38.14	89.34	0.97	-3.05	-0.47	-2.67	-0.72	-1.19	1.51	4680	32	Highly soluble	1.74	7990	54.7	Highly soluble	-0.18	96.1	0.658	Soluble	High	No	No	No	No	No	No	No	-9.36	0	3	0	0	2	0.55	0	0	1	1.75
XLGB-187	OC(=O)[C@H](Cc1ccc(cc1)O)N	C9H11NO3	181.19	13	6	0.22	3	4	3	47.52	83.55	0.84	-2.26	0.35	-1.7	0.39	-0.48	0.32	376	2.07	Highly soluble	1.04	1980	11	Highly soluble	-1.29	9.29	0.0513	Soluble	High	No	No	No	No	No	No	No	-9.01	0	0	0	0	2	0.55	0	0	1	1.54
XLGB-188	OC[C@H]1O[C@H]([C@@H]([C@@H]1O)O)n1cnc2c1ncnc2N	C10H13N5O4	267.24	19	9	0.5	2	7	4	62.67	139.54	0.61	-1.05	-2.3	-2.32	-2.37	-1.49	-1.05	23.6	0.0883	Very soluble	-1.39	10.8	0.0406	Very soluble	0.41	685	2.56	Soluble	Low	No	No	No	No	No	No	No	-8.68	0	1	0	1	0	0.55	0	0	0	3.86
XLGB-189	NC(=N)NCCC[C@@H](C(=O)O)N	C6H14N4O2	174.2	12	0	0.67	6	4	5	44.53	125.22	0.31	-4.2	-1.34	-3.21	-1.61	-2.01	2.12	23100	132	Highly soluble	2.18	26200	150	Highly soluble	0.06	200	1.15	Soluble	High	No	No	No	No	No	No	No	-10.34	0	1	0	0	2	0.55	0	2	1	2.16
XLGB-190	N[C@H](C(=O)O)C(C)C	C5H11NO2	117.15	8	0	0.8	2	3	2	30.63	63.32	1.03	-2.26	0.05	-2.2	-0.54	-0.78	0.99	1140	9.76	Highly soluble	1.46	3410	29.1	Highly soluble	0.29	227	1.94	Soluble	High	No	No	No	No	No	No	No	-8.62	0	3	0	0	2	0.55	0	0	1	1.19
XLGB-191	OC[C@H]1O[C@@H](O[C@@H]2OC=C[C@@H]3[C@H]2[C@H](C[C@@H]3O)O[C@H]2O[C@H](CO)[C@@H]([C@@H]([C@H]2O)O)O)[C@@H]([C@H]([C@@H]1O)O)O	C20H32O14	496.46	34	0	0.9	6	14	9	105.21	228.22	1.43	-3.96	-5.14	-4.37	-5.26	-3.46	-0.03	466	0.939	Very soluble	-0.23	289	0.583	Very soluble	4.89	38400000	77300	Soluble	Low	No	Yes	No	No	No	No	No	-12.14	2	2	1	1	4	0.17	0	0	1	6.65
XLGB-192	CCCCCCCCCCCCCCCCCCCCC(=O)O	C21H42O2	326.56	23	0	0.95	19	2	1	104.83	37.3	4.78	9.83	7.5	5.36	7.45	6.98	-6.8	5.13e-05	1.57e-07	Poorly soluble	-10.54	9.53e-09	2.92e-11	Insoluble	-7.31	1.61e-05	4.93e-08	Poorly soluble	Low	No	No	Yes	No	No	No	No	-1.31	1	1	1	1	2	0.85	0	0	2	2.88
XLGB-193	CCCCC[CH][CH]C[CH][CH]C[CH][CH]C[CH][CH]CCCC(=O)O	C20H32O2	304.47	22	0	0.95	18	2	1	91.57	37.3	0	9.29	5.63	5.13	7.01	5.41	-6.39	0.000123	4.05e-07	Poorly soluble	-9.97	3.23e-08	1.06e-10	Poorly soluble	-6.91	3.75e-05	1.23e-07	Poorly soluble	High	Yes	Yes	Yes	No	No	No	No	-1.56	1	1	1	0	2	0.85	0	0	2	2.46
XLGB-194	OC(=O)CCC(=O)O	C4H6O4	118.09	8	0	0.5	3	4	2	24.89	74.6	0.32	-0.59	-0.06	-0.54	-0.63	-0.3	0	117	0.994	Very soluble	-0.51	36.9	0.312	Very soluble	0.61	486	4.11	Soluble	High	No	No	No	No	No	No	No	-7.44	0	3	0	0	2	0.85	0	0	1	1.29
XLGB-195	CCCCCCCCCCCCCCCCC(=O)O	C17H34O2	270.45	19	0	0.94	15	2	1	85.6	37.3	4.11	7.69	5.94	4.44	5.69	5.57	-5.37	0.00115	4.25e-06	Moderately soluble	-8.31	1.31e-06	4.85e-09	Poorly soluble	-5.71	0.000524	1.94e-06	Moderately soluble	High	Yes	No	Yes	No	Yes	No	No	-2.49	1	1	1	1	1	0.85	0	0	2	2.42
XLGB-196	CCCCCCCCCCCCCCCCCCC(=O)O	C19H38O2	298.5	21	0	0.95	17	2	1	95.22	37.3	4.43	8.75	6.72	4.91	6.57	6.28	-6.08	0.000248	8.29e-07	Poorly soluble	-9.41	1.15e-07	3.85e-10	Poorly soluble	-6.51	9.18e-05	3.08e-07	Poorly soluble	High	No	No	Yes	No	No	No	No	-1.91	1	1	1	1	2	0.85	0	0	2	2.65
XLGB-197	CCCCCCCCCCCCCCC(=O)O	C15H30O2	242.4	17	0	0.93	13	2	1	75.99	37.3	3.66	6.63	5.16	3.94	4.81	4.84	-4.66	0.00528	2.18e-05	Moderately soluble	-7.21	1.48e-05	6.1e-08	Poorly soluble	-4.91	0.00298	1.23e-05	Moderately soluble	High	Yes	No	Yes	No	Yes	No	No	-3.07	0	0	1	0	1	0.85	0	0	3	2.2
XLGB-198	CCCCCCCCC(=O)O	C9H18O2	158.24	11	0	0.89	7	2	1	47.15	37.3	2.3	3.42	2.82	2.28	2.2	2.6	-2.51	0.485	0.00306	Soluble	-3.88	0.0207	0.000131	Soluble	-2.46	0.546	0.00345	Soluble	High	Yes	No	No	No	No	No	No	-4.84	0	1	0	0	1	0.85	0	0	1	1.57
XLGB-199	COc1cc(ccc1O)C(=O)O	C8H8O4	168.15	12	6	0.12	2	4	2	41.92	66.76	1.4	1.43	1.1	0.74	0.73	1.08	-2.02	1.6	0.00952	Soluble	-2.44	0.615	0.00366	Soluble	-1.32	8.1	0.0482	Soluble	High	No	No	No	No	No	No	No	-6.31	0	0	0	0	1	0.85	0	0	1	1.42
XLGB-200	OC[C@H]1O[C@@H](O[C@@H]2CCC(C(=C2C)C(=O)O)(C)C)[C@@H]([C@H]([C@@H]1O)O)O	C16H26O8	346.37	24	0	0.81	4	8	5	82.65	136.68	2.16	-0.58	-0.61	-0.86	-0.55	-0.09	-1.36	15.2	0.0438	Very soluble	-1.82	5.25	0.0151	Very soluble	0.4	878	2.54	Soluble	Low	No	Yes	No	No	No	No	No	-8.82	0	1	0	1	0	0.56	0	0	0	5.37
XLGB-201	O[C@H]1[C@@H]2CCO[C@H]3C2[C@]([C@@H]1O)(O)CO3	C9H14O5	202.2	14	0	1	0	5	3	44.73	79.15	1.05	-1.75	-1.54	-0.94	-0.69	-0.77	0.01	206	1.02	Highly soluble	0.6	810	4.01	Highly soluble	1.03	2180	10.8	Soluble	High	No	Yes	No	No	No	No	No	-8.78	0	1	0	0	0	0.55	0	0	1	4.47
XLGB-202	O[C@H]1O[C@@H]2OC[C@]3(C2[C@@H](C1)[C@H](O)[C@H]3Cl)O	C9H13ClO5	236.65	15	0	1	0	5	3	49.52	79.15	1	-0.99	-0.97	-0.23	-0.47	-0.33	-0.68	49	0.207	Very soluble	-0.19	154	0.652	Very soluble	0.65	1040	4.42	Soluble	High	No	Yes	No	No	No	No	No	-8.45	0	1	0	0	0	0.55	0	1	1	4.62
XLGB-203	O[C@H]1[C@@H]2CCO[C@H]3[C@@H]2[C@]([C@@H]1Cl)(O)CO3	C9H13ClO4	220.65	14	0	1	0	4	2	48.36	58.92	1.42	-0.47	-0.29	0.2	0.43	0.26	-0.91	27	0.122	Very soluble	-0.3	110	0.5	Very soluble	-0.16	152	0.69	Soluble	High	No	Yes	No	No	No	No	No	-7.98	0	0	0	0	0	0.55	0	1	1	4.52
XLGB-204	OC[C@H]1O[C@@H](O[C@@H]2O[C@H]3OC[C@]4([C@@H]2[C@@H](C3)[C@@H]([C@H]4Cl)O)O)[C@@H]([C@H]([C@@H]1O)O)O	C15H23ClO10	398.79	26	0	1	3	10	6	81.91	158.3	1.84	-2.59	-3.15	-2.56	-2.66	-1.83	-0.48	131	0.329	Very soluble	-0.19	259	0.649	Very soluble	2.33	85700	215	Soluble	Low	No	Yes	No	No	No	No	No	-10.57	1	1	1	1	3	0.55	0	1	1	6.15
XLGB-205	CCCCCCCC(=O)O	C8H16O2	144.21	10	0	0.88	6	2	1	42.34	37.3	1.95	3.05	2.43	1.96	1.77	2.23	-2.26	0.793	0.0055	Soluble	-3.5	0.0457	0.000317	Soluble	-2.05	1.3	0.00899	Soluble	High	Yes	No	No	No	No	No	No	-5.01	0	1	0	0	1	0.85	0	0	1	1.47
XLGB-206	CCCCCCCCCC(=O)O	C10H20O2	172.26	12	0	0.9	8	2	1	51.96	37.3	2.5	4.09	3.21	2.58	2.63	3	-2.96	0.19	0.0011	Soluble	-4.58	0.00454	2.64e-05	Moderately soluble	-2.87	0.23	0.00134	Soluble	High	Yes	No	No	No	No	No	No	-4.45	0	0	0	0	1	0.85	0	0	3	1.67
XLGB-207	OC[C@H]1O[C@@H](O[C@@H]2OC=C[C@@H]3[C@H]2[C@@](C)(O)C[C@@H]3O)[C@@H]([C@H]([C@@H]1O)O)O	C15H24O9	348.35	24	0	0.87	3	9	6	77.67	149.07	1.61	-2.19	-2.58	-2.59	-2.66	-1.68	-0.42	132	0.378	Very soluble	-0.41	136	0.39	Very soluble	2.54	121000	348	Soluble	Low	No	Yes	No	No	No	No	No	-9.98	1	1	1	1	2	0.55	0	0	0	5.74
XLGB-208	O=C(OC[C@H]1O[C@@H](O)[C@@]([C@H]([C@@H]1O)O[C@@H]1O[C@@H](C)[C@@H]([C@H]([C@H]1O)O)O)(O)CCc1ccc(c(c1)O)O)/C=C/c1ccc(c(c1)O)O	C29H36O15	624.59	44	12	0.48	10	15	10	148.54	256.29	1.25	-0.87	-1.39	-2.37	-1.18	-0.91	-2.71	1.23	0.00197	Soluble	-4.03	0.0582	9.32e-05	Moderately soluble	-0.12	472	0.755	Soluble	Low	No	No	No	No	No	No	No	-10.73	3	4	1	1	4	0.17	1	2	2	6.29
XLGB-209	OC(=O)Cc1ccccc1	C8H8O2	136.15	10	6	0.12	2	2	1	37.99	37.3	1.23	1.41	1.31	1.66	1.54	1.43	-1.88	1.78	0.013	Very soluble	-1.8	2.17	0.0159	Very soluble	-2.14	0.977	0.00718	Soluble	High	Yes	No	No	No	No	No	No	-6.13	0	3	0	0	1	0.85	0	0	1	1
XLGB-210	OC(=O)c1ccccc1	C7H6O2	122.12	9	6	0	1	2	1	33.4	37.3	1.11	1.87	1.38	1.6	1.24	1.44	-2.2	0.766	0.00627	Soluble	-2.27	0.648	0.00531	Soluble	-1.72	2.31	0.0189	Soluble	High	Yes	No	No	No	No	No	No	-5.72	0	3	0	0	1	0.85	0	0	1	1
XLGB-211	OC[C@H]1O[C@@H](O)[C@@]([C@H]([C@@H]1OC(=O)/C=C/c1ccc(c(c1)O)O)O[C@@H]1O[C@@H](C)[C@@H]([C@H]([C@H]1O)O)O)(O)CCc1ccc(c(c1)O)O	C29H36O15	624.59	44	12	0.48	10	15	10	148.54	256.29	1.25	-0.87	-1.39	-2.37	-1.18	-0.91	-2.71	1.23	0.00197	Soluble	-4.03	0.0582	9.32e-05	Moderately soluble	-0.12	472	0.755	Soluble	Low	No	No	No	No	No	No	No	-10.73	3	4	1	1	4	0.17	1	2	2	6.29
XLGB-212	OC(=O)C=Cc1ccccc1	C9H8O2	148.16	11	6	0	2	2	1	43.11	37.3	1.55	2.13	1.68	1.9	1.7	1.79	-2.37	0.629	0.00425	Soluble	-2.54	0.423	0.00285	Soluble	-1.84	2.14	0.0145	Soluble	High	Yes	No	No	No	No	No	No	-5.69	0	2	0	0	1	0.85	0	1	1	1.67
XLGB-213	OCc1ccc(o1)C=O	C6H6O3	126.11	9	5	0.17	2	3	1	30.22	50.44	0.91	-0.58	0.43	-1.06	1.24	0.19	-0.54	36.7	0.291	Very soluble	-0.01	124	0.98	Very soluble	-1.35	5.67	0.045	Soluble	High	No	No	No	No	No	No	No	-7.48	0	3	0	0	1	0.55	0	1	1	2.25
XLGB-214	CCCCCC/C=C\CCCCCCCC(=O)O	C16H30O2	254.41	18	0	0.81	13	2	1	80.32	37.3	3.53	6.58	5.33	4.09	5.07	4.92	-4.7	0.00502	1.97e-05	Moderately soluble	-7.16	1.75e-05	6.88e-08	Poorly soluble	-4.59	0.00649	2.55e-05	Moderately soluble	High	Yes	No	Yes	No	Yes	No	No	-3.18	0	0	1	0	1	0.85	0	1	2	2.84
XLGB-215	OCC1=C[C@H]([C@H]2[C@]1(CO)OC(=O)C2)O	C9H12O5	200.19	14	0	0.67	2	5	3	45.48	86.99	0.98	-2.5	-1.43	-0.78	-0.08	-0.76	0.63	846	4.23	Highly soluble	1.22	3290	16.5	Highly soluble	0.18	305	1.52	Soluble	High	No	No	No	No	No	No	No	-9.3	0	1	0	0	1	0.55	0	1	1	3.99
XLGB-216	OC[C@H]1O[C@@H](O[C@]2(C)CCCC([C@]2(O)/C=C/C(=O)C)(C)C)[C@@H]([C@H]([C@@H]1O)O)O	C19H32O8	388.45	27	0	0.84	5	8	5	96.74	136.68	1.85	-0.62	-0.35	-0.96	0.59	0.1	-1.53	11.5	0.0297	Very soluble	-1.78	6.47	0.0167	Very soluble	-0.28	204	0.526	Soluble	High	No	Yes	No	No	No	No	No	-9.11	0	0	0	1	0	0.55	0	1	1	5.75
XLGB-217	CO[C@H]1O[C@@H](OC)C[C@@H]2[C@H]1[C@@](C)(O)C[C@H]2O	C11H20O5	232.27	16	0	1	2	5	2	56.38	68.15	2.2	-0.16	0.1	-0.34	-0.04	0.35	-1.05	20.8	0.0897	Very soluble	-0.82	35.5	0.153	Very soluble	-0.17	155	0.668	Soluble	High	No	No	No	No	No	No	No	-7.83	0	0	0	0	0	0.55	0	0	1	4.6
XLGB-218	O=c1cc[nH]c(=O)[nH]1	C4H4N2O2	112.09	8	6	0	0	2	2	27.68	65.72	0.52	-1.07	-0.94	-1.21	1.35	-0.27	-0.42	43	0.384	Very soluble	0.18	169	1.51	Highly soluble	-1.41	4.39	0.0392	Soluble	High	No	No	No	No	No	No	No	-7.74	0	4	0	0	2	0.55	0	0	1	1.35
XLGB-219	OC[C@H]1O[C@H]([C@@H]([C@@H]1O)O)n1ccc(=O)[nH]c1=O	C9H12N2O6	244.2	17	6	0.56	2	6	4	54.27	124.78	0.44	-1.98	-3.18	-1.83	-1.39	-1.59	-0.24	142	0.581	Very soluble	-0.12	187	0.764	Very soluble	0.74	1350	5.55	Soluble	Low	No	No	No	No	No	No	No	-9.2	0	1	0	0	0	0.55	0	0	1	3.76
XLGB-220	O=C1CC[C@@H](N1)C(=O)O	C5H7NO3	129.11	9	0	0.6	1	3	2	32.72	66.4	0.51	-0.77	-1.03	-0.93	-0.08	-0.46	-0.09	105	0.814	Very soluble	-0.15	92.1	0.714	Very soluble	-0.04	119	0.923	Soluble	High	No	No	No	No	No	No	No	-7.63	0	4	0	0	1	0.85	0	0	1	1.67
XLGB-221	O=C1N(Cc2ccccc2)C(=O)C2C(N1Cc1ccccc1)C2(Br)Br	C19H16Br2N2O2	464.15	25	12	0.26	4	2	0	110.7	40.62	3.32	3.59	3.07	3.64	3.39	3.4	-5.07	0.00394	8.5e-06	Moderately soluble	-4.13	0.0344	7.42e-05	Moderately soluble	-6.65	0.000105	2.25e-07	Poorly soluble	High	Yes	No	No	Yes	Yes	Yes	Yes	-6.58	0	0	0	0	0	0.55	0	1	2	3.57
XLGB-222	CO[C@H]1O[C@@H]2OC[C@]3(C2[C@@H](C1)[C@H](O)[C@H]3Cl)O	C10H15ClO5	250.68	16	0	1	1	5	2	54.25	68.15	1.72	-0.46	-0.32	0.06	0	0.2	-1.04	22.9	0.0915	Very soluble	-0.51	78.4	0.313	Very soluble	-0.06	220	0.879	Soluble	High	No	Yes	No	No	No	No	No	-8.16	0	0	0	0	0	0.55	0	1	0	4.69
XLGB-223	CO[C@@H]1O[C@@H]2OC[C@]3(C2[C@@H](C1)[C@H](O)[C@H]3Cl)O	C10H15ClO5	250.68	16	0	1	1	5	2	54.25	68.15	1.7	-0.46	-0.32	0.06	0	0.2	-1.04	22.9	0.0915	Very soluble	-0.51	78.4	0.313	Very soluble	-0.06	220	0.879	Soluble	High	No	Yes	No	No	No	No	No	-8.16	0	0	0	0	0	0.55	0	1	0	4.69
XLGB-224	CO[C@H]1O[C@@H]2OC[C@]3(C2[C@@H](C1)[C@H](O)[C@H]3O)O	C10H16O6	232.23	16	0	1	1	6	3	50.62	88.38	1.49	-1.73	-1.57	-1.04	-1.12	-0.79	-0.12	175	0.752	Very soluble	0.39	567	2.44	Highly soluble	1.13	3150	13.6	Soluble	High	No	Yes	No	No	No	No	No	-8.94	0	1	0	0	0	0.55	0	0	1	4.56
XLGB-225	CC(=O)O[C@H]1CC[C@]2(C(C1(C)C)CC[C@@]1([C@@H]2CC=C2[C@@]1(C)CC[C@@]1([C@@H]2CC(C)(C)CC1)C(=O)O)C)C	C32H50O4	498.74	36	0	0.88	3	4	1	146.39	63.6	4.36	8.06	7.8	6.06	6.36	6.53	-7.81	7.69e-06	1.54e-08	Poorly soluble	-9.25	2.8e-07	5.61e-10	Poorly soluble	-6.73	9.33e-05	1.87e-07	Poorly soluble	Low	No	No	No	No	Yes	No	No	-3.62	1	4	0	1	1	0.85	0	1	2	6.14
XLGB-226	CC1COC2=C1C(=O)C(=O)c1c2ccc2c1cccc2C	C18H14O3	278.3	21	10	0.22	0	3	0	80.68	43.37	2.43	3.16	3.29	1.93	4.35	3.03	-3.91	0.0343	0.000123	Soluble	-3.74	0.0505	0.000182	Soluble	-5.76	0.00048	1.73e-06	Moderately soluble	High	Yes	No	Yes	Yes	Yes	Yes	Yes	-5.75	0	0	0	0	0	0.85	2	1	0	3.74
XLGB-227	CC1COC2=C1C(=O)c1c(C2=O)c2cccc(c2cc1)C	C18H14O3	278.3	21	10	0.22	0	3	0	80.11	43.37	2.52	3.62	3.45	1.93	4.35	3.17	-4.2	0.0176	6.33e-05	Moderately soluble	-4.22	0.0168	6.05e-05	Moderately soluble	-5.76	0.00048	1.73e-06	Moderately soluble	High	Yes	No	Yes	Yes	Yes	Yes	Yes	-5.43	0	0	0	0	0	0.85	1	0	1	3.75
XLGB-228	C[C@@H]1CC[C@]2([C@@H]([C@H]1C)C1=CC[C@H]3[C@@]([C@@]1(CC2)C)(C)CCC1[C@]3(C)C[C@@H](O)[C@H](C1(C)C)O)C(=O)O	C30H48O4	472.7	34	0	0.9	1	4	3	138.08	77.76	3.54	6.37	6.06	4.97	4.56	5.1	-6.72	9.05e-05	1.91e-07	Poorly soluble	-7.79	7.59e-06	1.61e-08	Poorly soluble	-4.85	0.00668	1.41e-05	Moderately soluble	High	No	Yes	No	No	No	No	No	-4.66	1	3	0	1	1	0.56	0	1	2	6.34
XLGB-229	C[C@@H]1CC[C@]2([C@@H]([C@H]1C)C1=CC[C@H]3[C@@]([C@@]1(CC2)C)(C)CCC1[C@]3(C)C[C@@H](O)[C@@H](C1(C)C)O)C(=O)O	C30H48O4	472.7	34	0	0.9	1	4	3	138.08	77.76	3.6	6.37	6.06	4.97	4.56	5.11	-6.72	9.05e-05	1.91e-07	Poorly soluble	-7.79	7.59e-06	1.61e-08	Poorly soluble	-4.85	0.00668	1.41e-05	Moderately soluble	High	No	Yes	No	No	No	No	No	-4.66	1	3	0	1	1	0.56	0	1	2	6.34
XLGB-230	Cc1cc(O)c2c(c1)C(=O)c1c(C2=O)cccc1O	C15H10O4	254.24	19	12	0.07	0	4	2	68.76	74.6	2.26	4.08	2.18	0.92	3.04	2.5	-4.45	0.00894	3.52e-05	Moderately soluble	-5.35	0.00113	4.45e-06	Moderately soluble	-4.49	0.00832	3.27e-05	Moderately soluble	High	Yes	No	Yes	No	Yes	No	Yes	-4.95	0	0	0	0	0	0.55	1	0	1	2.46
XLGB-231	O=Cc1ccc(c(c1)O)O	C7H6O3	138.12	10	6	0	1	3	2	35.88	57.53	0.79	1.09	0.91	0.18	1.02	0.8	-1.76	2.39	0.0173	Very soluble	-1.89	1.78	0.0129	Very soluble	-1.17	9.4	0.0681	Soluble	High	Yes	No	No	No	No	No	Yes	-6.37	0	3	0	0	1	0.55	1	2	1	1
XLGB-232	O[C@@H]1C[C@@]2(C)C(C([C@@H]1O)(C)C)CC[C@@]1([C@@H]2CC=C2[C@@]1(C)CC[C@@]1([C@H]2[C@](C)(O)[C@H](C)CC1)C(=O)O)C	C30H48O5	488.7	35	0	0.9	1	5	4	139.28	97.99	3.1	4.96	5.18	4.14	4.07	4.29	-5.93	0.000576	1.18e-06	Moderately soluble	-6.76	8.57e-05	1.75e-07	Poorly soluble	-4.48	0.0163	3.33e-05	Moderately soluble	High	No	Yes	No	No	No	No	No	-5.76	0	3	0	0	0	0.56	0	1	2	6.59
XLGB-233	COC(=O)[C@@]12CC[C@H]([C@@]([C@H]2C2=CC[C@H]3[C@@]([C@@]2(CC1)C)(C)CCC1[C@]3(C)C[C@H]([C@@H](C1(C)C)OC(=O)C)O)(C)O)C	C33H52O6	544.76	39	0	0.88	4	6	2	153.33	93.06	3.93	5.86	5.83	4.61	5.15	5.08	-6.65	0.000123	2.26e-07	Poorly soluble	-7.59	1.41e-05	2.59e-08	Poorly soluble	-5.76	0.000936	1.72e-06	Moderately soluble	High	No	Yes	No	No	No	No	No	-5.46	2	4	0	0	1	0.17	0	2	2	6.83
XLGB-234	OC[C@@]1(C)[C@H](O)[C@H](O)C[C@]2(C1CC[C@@]1([C@@H]2CC=C2[C@@]1(C)CC[C@@]1([C@H]2[C@@H](C)[C@@H](CC1)C)C(=O)O)C)C	C30H48O5	488.7	35	0	0.9	2	5	4	139.24	97.99	3.16	5.7	5.03	4.14	3.96	4.4	-6.33	0.000229	4.69e-07	Poorly soluble	-7.52	1.46e-05	2.99e-08	Poorly soluble	-4.28	0.0259	5.31e-05	Moderately soluble	High	No	Yes	No	No	No	No	No	-5.23	0	3	0	0	1	0.56	0	1	2	6.56
XLGB-235	OCC1(O)CCCc2c1ccc1c2C(=O)C(=O)c2c1occ2C	C18H16O5	312.32	23	11	0.33	1	5	2	82.22	87.74	2.2	1.12	2.04	0.33	3.75	1.89	-2.77	0.531	0.0017	Soluble	-2.56	0.868	0.00278	Soluble	-5.18	0.00206	6.61e-06	Moderately soluble	High	No	Yes	Yes	No	No	No	No	-7.41	0	0	0	0	0	0.55	2	1	0	4.07
XLGB-236	Cc1cccc2c1ccc1c2c(=O)oc2c1occ2C	C17H12O3	264.28	20	17	0.12	0	3	0	79.69	43.35	2.9	4.12	4.31	3.13	4.87	3.86	-4.7	0.00524	1.98e-05	Moderately soluble	-4.74	0.00484	1.83e-05	Moderately soluble	-6.95	2.94e-05	1.11e-07	Poorly soluble	High	Yes	No	Yes	Yes	No	No	No	-4.99	0	0	0	0	0	0.55	0	1	1	3.31
XLGB-237	O=C(O[C@@H](C(=O)O)Cc1ccc(c(c1)O)O)/C=C/c1ccc(c2c1[C@@H](C(=O)O[C@@H](C(=O)O)Cc1ccc(c(c1)O)O)[C@@H](O2)c1ccc(c(c1)O)O)O	C36H30O16	718.61	52	24	0.17	14	16	9	178.07	278.04	0.49	3.98	2.9	0.25	2.57	2.04	-6.22	0.000433	6.02e-07	Poorly soluble	-9.52	2.17e-07	3.02e-10	Poorly soluble	-4.41	0.0282	3.93e-05	Moderately soluble	Low	No	No	No	No	No	No	No	-7.86	3	3	2	1	4	0.11	1	3	3	6
XLGB-238	OC(=O)C1Cc2ccc(c3c2C(=Cc2ccc(c(c2O3)O)O)C1=O)O	C18H12O7	340.28	25	12	0.11	1	7	4	87.2	124.29	1.52	2.69	2.17	0.75	1.7	1.77	-3.93	0.0396	0.000117	Soluble	-4.95	0.00379	1.12e-05	Moderately soluble	-3.06	0.296	0.000869	Soluble	High	No	No	Yes	No	Yes	No	No	-6.47	0	0	0	0	0	0.56	1	3	0	3.89
XLGB-239	C[C@@H]1CO[C@@]2(C1)OC(=O)c1c2ccc2c1CCCC2(C)C	C18H22O3	286.37	21	6	0.61	0	3	0	80.78	35.53	3.13	4.33	3.57	4.05	4.46	3.91	-4.55	0.00798	2.79e-05	Moderately soluble	-4.79	0.00464	1.62e-05	Moderately soluble	-5.16	0.00198	6.92e-06	Moderately soluble	High	Yes	Yes	No	Yes	Yes	Yes	Yes	-4.97	0	0	0	0	0	0.55	0	0	1	4.36
XLGB-240	Cc1coc2c1C(=O)C(=O)c1c2ccc2c1cccc2C	C18H12O3	276.29	21	15	0.11	0	3	0	80.24	47.28	2.44	3.69	4.1	1.82	4.95	3.4	-4.41	0.0108	3.92e-05	Moderately soluble	-4.37	0.0117	4.23e-05	Moderately soluble	-6.91	3.44e-05	1.24e-07	Poorly soluble	High	Yes	No	Yes	Yes	No	No	Yes	-5.37	0	0	0	0	0	0.55	2	1	1	3.28
XLGB-241	O=C1c2c3CCCC(c3ccc2c2c(C1=O)c(C)co2)(C)C	C19H18O3	294.34	22	11	0.37	0	3	0	84.7	47.28	2.79	4.33	4.25	2.24	5.37	3.8	-4.76	0.00508	1.73e-05	Moderately soluble	-5.04	0.0027	9.18e-06	Moderately soluble	-6.71	5.77e-05	1.96e-07	Poorly soluble	High	Yes	Yes	Yes	Yes	Yes	Yes	Yes	-5.02	0	0	0	0	0	0.55	2	1	1	3.66
XLGB-242	OC[C@@]1(C)CCCc2c1ccc1c2C(=O)C(=O)c2c1occ2C	C19H18O4	310.34	23	11	0.37	1	4	1	85.86	67.51	2.41	2.93	3.22	1.39	4.75	2.94	-3.9	0.0393	0.000126	Soluble	-4.01	0.0304	9.79e-05	Moderately soluble	-6.14	0.000223	7.19e-07	Poorly soluble	High	Yes	Yes	Yes	Yes	Yes	Yes	Yes	-6.11	0	0	0	0	0	0.55	2	1	0	4.13
XLGB-243	OCC(C1=C(O)C(=O)c2c(C1=O)ccc1c2CCCC1(C)C)C	C19H22O4	314.38	23	6	0.47	2	4	2	88.33	74.6	2.72	3.47	3.12	1.51	4.15	2.99	-4.04	0.0289	9.2e-05	Moderately soluble	-4.72	0.00601	1.91e-05	Moderately soluble	-4.8	0.00499	1.59e-05	Moderately soluble	High	Yes	No	No	Yes	Yes	No	Yes	-5.75	0	0	0	0	0	0.85	1	0	0	3.86
XLGB-244	OCC(C1=C(O)C(=O)c2c(C1=O)ccc1c2cccc1C)C	C18H16O4	296.32	22	10	0.22	2	4	2	83.87	74.6	2.3	2.83	2.97	1.08	3.72	2.58	-3.66	0.0642	0.000217	Soluble	-4.05	0.0261	8.82e-05	Moderately soluble	-5	0.00297	1e-05	Moderately soluble	High	Yes	No	Yes	No	Yes	No	No	-6.1	0	0	0	0	0	0.85	1	0	0	3.53
XLGB-245	O=C1CCC(c2c1c1c(cc2)cc(c(c1O)O)C(C)C)(C)C	C19H22O3	298.38	22	10	0.42	1	3	2	89.92	57.53	3.14	4.56	4.63	2.86	4.69	3.97	-4.83	0.00438	1.47e-05	Moderately soluble	-5.49	0.000963	3.23e-06	Moderately soluble	-5.5	0.00095	3.18e-06	Moderately soluble	High	Yes	No	Yes	Yes	No	Yes	No	-4.88	0	0	0	0	0	0.55	2	1	1	2.48
XLGB-246	CC(C1=Cc2ccc3c(c2C(=O)C1=O)CCCC3(C)C)C	C19H22O2	282.38	21	6	0.47	1	2	0	86.16	34.14	2.84	4.88	4	3.24	5.27	4.04	-4.81	0.00437	1.55e-05	Moderately soluble	-5.33	0.00131	4.65e-06	Moderately soluble	-5.73	0.000531	1.88e-06	Moderately soluble	High	Yes	No	No	No	Yes	No	No	-4.56	0	0	0	0	0	0.55	2	1	1	3.44
XLGB-247	O=CC1(C)CCCc2c1ccc1c2C(=O)C(=O)c2c1occ2C	C19H16O4	308.33	23	11	0.32	1	4	0	84.9	64.35	2.35	2.81	3.43	1.31	5.05	2.99	-3.81	0.0478	0.000155	Soluble	-3.82	0.0468	0.000152	Soluble	-6.26	0.000168	5.46e-07	Poorly soluble	High	Yes	No	Yes	Yes	Yes	No	Yes	-6.19	0	0	0	0	0	0.55	2	2	0	4.06
XLGB-248	O=C1c2c3CCCC(=O)c3ccc2c2c(C1=O)c(C)co2	C17H12O4	280.27	21	11	0.24	0	4	0	75.62	64.35	2.03	2.18	3.15	0.84	4.47	2.54	-3.34	0.128	0.000458	Soluble	-3.16	0.192	0.000684	Soluble	-5.84	0.000406	1.45e-06	Moderately soluble	High	Yes	No	Yes	Yes	No	No	Yes	-6.46	0	0	0	0	0	0.55	2	1	0	3.4
XLGB-249	CC1COC2=C1C(=O)C(=O)c1c2ccc2c1CCC=C2C	C18H16O3	280.32	21	6	0.33	0	3	0	80.76	43.37	2.57	2.55	3.18	2.05	4.27	2.92	-3.4	0.113	0.000402	Soluble	-3.11	0.219	0.00078	Soluble	-4.95	0.00317	1.13e-05	Moderately soluble	High	Yes	No	Yes	Yes	Yes	No	Yes	-6.2	0	0	0	0	0	0.85	2	1	0	3.94
XLGB-250	CC(C1=Cc2ccc3c(c2C(=O)C1=O)CCCC3=C)C	C18H18O2	266.33	20	6	0.33	1	2	0	81.79	34.14	2.7	3.86	3.73	2.93	5.05	3.65	-4.08	0.0222	8.34e-05	Moderately soluble	-4.27	0.0142	5.33e-05	Moderately soluble	-5.36	0.00118	4.42e-06	Moderately soluble	High	Yes	No	Yes	Yes	Yes	No	Yes	-5.18	0	0	0	0	0	0.55	2	1	1	3.3
XLGB-251	O=C1c2c3CCCC(=C)c3ccc2c2c(C1=O)c(C)co2	C18H14O3	278.3	21	11	0.22	0	3	0	80.33	47.28	2.59	3.32	3.98	1.93	5.16	3.4	-4.04	0.0251	9.02e-05	Moderately soluble	-3.99	0.0285	0.000103	Soluble	-6.34	0.000128	4.6e-07	Poorly soluble	High	Yes	No	Yes	Yes	Yes	Yes	Yes	-5.64	0	0	0	0	0	0.55	2	1	0	3.5
XLGB-252	O[C@H]1CC[C@]2(C(C1(C)C)CC[C@@]1([C@@H]2CC=C2[C@@]1(C)CC[C@@]1([C@@H]2CC(C)(C)CC1)C(=O)O)C)C	C30H48O3	456.7	33	0	0.9	1	3	2	136.65	57.53	3.95	7.49	7.23	5.82	5.85	6.07	-7.32	2.16e-05	4.74e-08	Poorly soluble	-8.53	1.34e-06	2.94e-09	Poorly soluble	-6.12	0.000345	7.55e-07	Poorly soluble	Low	No	No	No	No	No	No	No	-3.77	1	3	0	1	1	0.85	0	1	2	6.08
XLGB-253	Cc1coc2c1C(=O)c1c(C2=O)c2cccc(c2cc1)C	C18H12O3	276.29	21	15	0.11	0	3	0	79.45	47.28	2.52	4.25	3.83	1.82	4.95	3.47	-4.76	0.00481	1.74e-05	Moderately soluble	-4.95	0.00307	1.11e-05	Moderately soluble	-6.91	3.44e-05	1.24e-07	Poorly soluble	High	Yes	No	Yes	Yes	Yes	No	No	-4.97	0	0	0	0	0	0.55	1	0	1	3.23
XLGB-254	COc1ccc(cc1O)C=CC(=O)O	C10H10O4	194.18	14	6	0.1	3	4	2	51.63	66.76	1.79	1.51	1.39	1	1.26	1.39	-2.11	1.49	0.00768	Soluble	-2.52	0.586	0.00302	Soluble	-1.42	7.43	0.0383	Soluble	High	Yes	No	No	No	No	No	No	-6.41	0	0	0	0	1	0.85	0	1	1	1.9
XLGB-255	CC(=CCOc1c2ccoc2cc2c1ccc(=O)o2)C	C16H14O4	270.28	20	13	0.19	3	4	0	77.5	52.58	3.07	3.43	3.88	2.14	3.99	3.3	-3.96	0.0297	0.00011	Soluble	-4.21	0.0165	6.1e-05	Moderately soluble	-5.51	0.000833	3.08e-06	Moderately soluble	High	Yes	No	Yes	Yes	Yes	No	No	-5.51	0	0	0	0	0	0.55	0	2	0	3.24
XLGB-256	CC1COC2=C1C(=O)c1c(C2=O)c2CCCC(c2cc1)(C)C	C19H20O3	296.36	22	6	0.47	0	3	0	84.56	43.37	2.84	4.26	3.6	2.36	4.76	3.57	-4.56	0.00811	2.73e-05	Moderately soluble	-4.88	0.00388	1.31e-05	Moderately soluble	-5.57	0.000807	2.72e-06	Moderately soluble	High	Yes	No	Yes	Yes	Yes	No	Yes	-5.08	0	0	0	0	0	0.85	1	0	1	4.03
XLGB-257	CC[C@@H](C(C)C)/C=C/[C@H]([C@H]1CC[C@@H]2[C@]1(C)CC[C@H]1[C@H]2CC=C2[C@]1(C)CC[C@@H](C2)O)C	C29H48O	412.69	30	0	0.86	5	1	1	132.75	20.23	5.08	8.56	7.8	6.62	6.86	6.98	-7.46	1.43e-05	3.46e-08	Poorly soluble	-8.86	5.71e-07	1.38e-09	Poorly soluble	-5.47	0.0014	3.39e-06	Moderately soluble	Low	No	No	No	No	Yes	No	No	-2.74	1	3	0	1	2	0.55	0	1	2	6.21
XLGB-258	CC(c1cc2CC[C@@H]3[C@](c2cc1O)(C)CCCC3(C)C)C	C20H30O	286.45	21	6	0.7	1	1	1	91.64	20.23	3.62	6.71	5.55	4.92	5.5	5.26	-5.99	0.000294	1.03e-06	Moderately soluble	-6.94	3.3e-05	1.15e-07	Poorly soluble	-5.77	0.000491	1.71e-06	Moderately soluble	High	Yes	No	No	Yes	Yes	Yes	No	-3.28	1	0	0	0	2	0.55	0	0	1	3.33
XLGB-259	O=C1C[C@H]2C(C)(C)CCC[C@@]2(c2c1cc(C(C)C)c(c2)O)C	C20H28O2	300.44	22	6	0.65	1	2	1	92.06	37.3	3.29	5.62	5.19	3.9	5.19	4.64	-5.38	0.00125	4.18e-06	Moderately soluble	-6.17	0.000205	6.82e-07	Poorly soluble	-5.65	0.000674	2.24e-06	Moderately soluble	High	Yes	No	No	Yes	Yes	No	No	-4.14	0	0	0	0	1	0.55	0	0	1	3.45
XLGB-260	O=C(OC(C(=O)O)Cc1ccc(c(c1)O)O)C=Cc1ccc(c(c1)O)O	C18H16O8	360.31	26	12	0.11	7	8	5	91.4	144.52	1.17	2.36	1.65	0.9	1.5	1.52	-3.44	0.131	0.000363	Soluble	-5.04	0.00332	9.22e-06	Moderately soluble	-2.17	2.41	0.0067	Soluble	Low	No	No	No	No	No	No	No	-6.82	0	0	1	1	0	0.56	1	2	1	3.38
XLGB-261	CC1COC2=C1C(=O)c1c(C2=O)c2C(=O)CCC(c2cc1)(C)C	C19H18O4	310.34	23	6	0.42	0	4	0	84.99	60.44	2.19	2.98	3.24	1.43	4.45	2.86	-3.83	0.0454	0.000146	Soluble	-3.91	0.0379	0.000122	Soluble	-5.45	0.00111	3.57e-06	Moderately soluble	High	Yes	Yes	Yes	Yes	Yes	No	Yes	-6.08	0	0	0	0	0	0.85	1	0	0	3.99
XLGB-262	OC(=O)[C@H]1O[C@@H](Oc2cc3oc(cc(=O)c3c(c2O)O)c2ccccc2)[C@@H]([C@H]([C@@H]1O)O)O	C21H18O11	446.36	32	16	0.24	4	11	6	106.72	187.12	1.75	1.11	0.14	-1.63	-0.1	0.25	-3.41	0.173	0.000387	Soluble	-4.63	0.0104	2.33e-05	Moderately soluble	-2.22	2.67	0.00598	Soluble	Low	No	Yes	No	No	No	No	No	-8.23	2	0	1	1	3	0.11	1	1	1	5.09
XLGB-263	O[C@@H]1CCc2c(C1(C)C)ccc1c2C(=O)C(=O)c2c1occ2C	C19H18O4	310.34	23	11	0.37	0	4	1	85.86	67.51	2.5	2.99	3.22	1.39	4.46	2.91	-4	0.0309	9.96e-05	Moderately soluble	-4.07	0.0263	8.48e-05	Moderately soluble	-5.89	0.000395	1.27e-06	Moderately soluble	High	Yes	Yes	Yes	Yes	Yes	Yes	Yes	-6.07	0	0	0	0	0	0.55	2	1	0	4.14
XLGB-264	O[C@H]1C[C@H]2C(C)(C)CCC[C@@]2(C2=C1C=C(C(C)C)C(=O)C2=O)C	C20H28O3	316.43	23	0	0.7	1	3	1	92.01	54.37	2.81	3.78	3.61	2.76	4.1	3.41	-4.12	0.0242	7.63e-05	Moderately soluble	-4.62	0.00767	2.42e-05	Moderately soluble	-4.17	0.0213	6.75e-05	Moderately soluble	High	Yes	No	No	Yes	Yes	No	Yes	-5.55	0	0	0	0	0	0.55	2	2	1	5.2
XLGB-265	C[C@H]1COC2=C1C(=O)C(=O)c1c2ccc2c1CCCC2(C)C	C19H20O3	296.36	22	6	0.47	0	3	0	85.13	43.37	2.81	3.8	3.44	2.36	4.76	3.43	-4.27	0.0158	5.33e-05	Moderately soluble	-4.41	0.0117	3.93e-05	Moderately soluble	-5.57	0.000807	2.72e-06	Moderately soluble	High	Yes	Yes	Yes	Yes	Yes	No	Yes	-5.41	0	0	0	0	0	0.85	2	1	1	4.11
XLGB-266	C[C@@H]1CC[C@@]2(OC1)O[C@@H]1[C@H]([C@@H]2C)[C@@]2([C@@H](C1)[C@@H]1CC[C@@H]3[C@]([C@H]1CC2)(C)CC[C@@H](C3)O)C	C27H44O3	416.64	30	0	1	0	3	1	122.07	38.69	4.55	6.49	5.79	5.08	4.3	5.24	-6.51	0.000128	3.08e-07	Poorly soluble	-7.1	3.32e-05	7.97e-08	Poorly soluble	-4.51	0.0129	3.1e-05	Moderately soluble	High	Yes	No	No	No	No	No	No	-4.23	1	2	0	0	1	0.55	0	0	2	6.88
XLGB-267	O=c1c(O)cc2c(cc1C)ccc1c2CCCC1(C)C	C18H20O2	268.35	20	11	0.39	0	2	1	84.14	37.3	3.03	4.91	3.83	3.2	4.98	3.99	-5	0.00266	9.91e-06	Moderately soluble	-5.43	0.000998	3.72e-06	Moderately soluble	-6.08	0.000222	8.26e-07	Poorly soluble	High	Yes	No	Yes	Yes	No	Yes	No	-4.45	0	0	0	0	0	0.55	0	0	1	2.24
XLGB-268	CC(=O)c1cc2ccc3c(c2cc1O)CCCC3(C)C	C18H20O2	268.35	20	10	0.39	1	2	1	83.09	37.3	3.03	5.3	4.36	3.23	4.82	4.15	-5.15	0.00191	7.13e-06	Moderately soluble	-5.83	0.000393	1.46e-06	Moderately soluble	-5.71	0.000527	1.96e-06	Moderately soluble	High	Yes	No	Yes	Yes	Yes	Yes	No	-4.17	0	0	0	0	1	0.55	0	0	1	2.04
XLGB-269	C[C@@H]1CC[C@]2([C@@H]([C@H]1C)C1=CC[C@H]3[C@@]([C@@]1(CC2)C)(C)CCC1[C@]3(C)CC[C@@H](C1(C)C)O)C(=O)O	C30H48O3	456.7	33	0	0.9	1	3	2	136.91	57.53	3.95	7.34	7.09	5.82	5.46	5.93	-7.23	2.69e-05	5.89e-08	Poorly soluble	-8.38	1.92e-06	4.21e-09	Poorly soluble	-5.67	0.000972	2.13e-06	Moderately soluble	Low	No	No	No	No	No	No	No	-3.87	1	3	0	1	1	0.85	0	1	2	6.21
XLGB-270	O=Cc1cccc2c1ccc1c2C(=O)C(=O)c2c1occ2C	C18H10O4	290.27	22	15	0.06	1	4	0	80.66	64.35	1.91	2.79	3.6	0.9	4.64	2.77	-3.84	0.0424	0.000146	Soluble	-3.8	0.0462	0.000159	Soluble	-6.46	0.0001	3.45e-07	Poorly soluble	High	Yes	No	Yes	Yes	Yes	No	Yes	-6.09	0	0	0	0	0	0.55	2	2	0	3.25
XLGB-271	O[C@H]1CCc2c([C@@]1(C)O)ccc1c2C(=O)C(=O)c2c1occ2C	C18H16O5	312.32	23	11	0.33	0	5	2	82.22	87.74	2.14	1.19	2.04	0.33	3.46	1.83	-2.88	0.412	0.00132	Soluble	-2.63	0.735	0.00235	Soluble	-4.93	0.00365	1.17e-05	Moderately soluble	High	No	Yes	Yes	No	No	No	No	-7.36	0	0	0	0	0	0.55	2	1	0	4.34
XLGB-272	O[C@H]1CCc2c([C@@]1(C)O)ccc1c2C(=O)C(=O)c2c1occ2C	C18H16O5	312.32	23	11	0.33	0	5	2	82.22	87.74	2.14	1.19	2.04	0.33	3.46	1.83	-2.88	0.412	0.00132	Soluble	-2.63	0.735	0.00235	Soluble	-4.93	0.00365	1.17e-05	Moderately soluble	High	No	Yes	Yes	No	No	No	No	-7.36	0	0	0	0	0	0.55	2	1	0	4.34
XLGB-273	C[C@H]1COC2=C1C(=O)C(=C1C2=CC(=O)C2=C1CCCC2(C)C)O	C19H20O4	312.36	23	0	0.47	0	4	1	85.89	63.6	2.76	2.15	3.32	1.51	3.46	2.64	-3.13	0.231	0.000739	Soluble	-3.12	0.238	0.000762	Soluble	-3.82	0.0468	0.00015	Soluble	High	Yes	Yes	No	Yes	Yes	No	No	-6.68	0	0	0	0	0	0.85	0	0	0	4.59
XLGB-274	O=C1C(=O)c2c(C)coc2c2c1ccc1c2cccc1C	C18H12O3	276.29	21	15	0.11	0	3	0	80.24	47.28	2.44	3.69	4.1	1.82	4.95	3.4	-4.41	0.0108	3.92e-05	Moderately soluble	-4.37	0.0117	4.23e-05	Moderately soluble	-6.91	3.44e-05	1.24e-07	Poorly soluble	High	Yes	No	Yes	Yes	No	No	Yes	-5.37	0	0	0	0	0	0.55	2	1	1	3.34
XLGB-275	OCC1(C)CCCc2c1ccc1c2C(=O)c2c(C1=O)c(co2)C	C19H18O4	310.34	23	11	0.37	1	4	1	85.07	67.51	2.55	3.48	2.95	1.39	4.75	3.02	-4.24	0.0177	5.7e-05	Moderately soluble	-4.58	0.00816	2.63e-05	Moderately soluble	-6.14	0.000223	7.19e-07	Poorly soluble	High	Yes	Yes	Yes	Yes	Yes	Yes	Yes	-5.72	0	0	0	0	0	0.55	1	0	0	3.92
XLGB-276	C[C@H]1CO[C@@]2(C1)OC(=O)c1c2ccc2c1cccc2C	C17H16O3	268.31	20	10	0.35	0	3	0	76.32	35.53	2.8	3.69	3.42	3.6	4.06	3.51	-4.2	0.017	6.34e-05	Moderately soluble	-4.13	0.0201	7.47e-05	Moderately soluble	-5.36	0.00118	4.4e-06	Moderately soluble	High	Yes	Yes	No	Yes	Yes	No	No	-5.32	0	0	0	0	0	0.55	0	0	1	3.95
XLGB-277	Oc1cc(O)c2=CC(=C([O]=c2c1)c1ccc(c(c1)O)O)O	C15H11O6	287.24	21	12	0	1	6	5	76.48	118.22	-2.41	0.77	0.84	-0.26	0.24	-0.16	-2.46	0.989	0.00344	Soluble	-2.83	0.422	0.00147	Soluble	-2.66	0.634	0.00221	Soluble	High	No	Yes	No	No	No	No	No	-7.51	0	0	0	0	0	0.55	1	1	0	3.79
XLGB-278	OC[C@H]1O[C@@H](Oc2cc(O)c3c(c2)oc(cc3=O)c2ccc(c(c2)O)O)[C@@H]([C@H]([C@@H]1O)O)O	C21H20O11	448.38	32	16	0.29	4	11	7	108.13	190.28	1.76	1.46	-0.24	-2.1	-0.12	0.15	-3.65	0.101	0.000226	Soluble	-5.06	0.00389	8.67e-06	Moderately soluble	-2.1	3.55	0.00791	Soluble	Low	No	Yes	No	No	No	No	No	-8	2	0	1	1	3	0.17	1	1	1	5.17
XLGB-279	C=C1[C@H]2CC[C@@H](C1(C)C)C2	C10H16	136.23	10	0	0.8	0	0	0	45.22	0	2.57	4.22	3	4.29	3.08	3.43	-3.34	0.0618	0.000454	Soluble	-3.93	0.016	0.000117	Soluble	-2.48	0.455	0.00334	Soluble	Low	Yes	No	No	No	Yes	No	No	-4.13	1	1	0	0	2	0.55	0	1	2	3.5
XLGB-280	CC1=CCCC(=C)[C@@H]2[C@@H](CC1)C(C2)(C)C	C15H24	204.35	15	0	0.73	0	0	0	68.78	0	3.29	4.38	4.73	4.63	4.19	4.24	-3.87	0.0278	0.000136	Soluble	-4.1	0.0164	8.01e-05	Moderately soluble	-3.77	0.0349	0.000171	Soluble	Low	No	No	No	Yes	Yes	No	No	-4.44	1	0	0	0	1	0.55	0	1	2	4.51
XLGB-281	OC(=O)CC[C@@H](C(=O)O)N	C5H9NO4	147.13	10	0	0.6	4	5	3	32.4	100.62	0.4	-3.69	-0.74	-3.18	-1.19	-1.68	1.84	10100	68.6	Highly soluble	2.16	21500	146	Highly soluble	0.89	1150	7.83	Soluble	High	No	No	No	No	No	No	No	-9.82	0	4	0	0	2	0.56	0	0	1	1.81
XLGB-282	OC(=O)[C@@H]1CCCN1	C5H9NO2	115.13	8	0	0.8	1	3	2	32.52	49.33	0.84	-2.5	-0.56	-2.59	0.22	-0.92	1.09	1410	12.2	Highly soluble	2.01	11700	102	Highly soluble	-0.13	85.7	0.745	Soluble	High	No	No	No	No	No	No	No	-8.78	0	4	0	0	2	0.55	0	0	1	1.54
XLGB-283	OC(=O)C[C@@H](C(=O)O)N	C4H7NO4	133.1	9	0	0.5	3	5	3	27.59	100.62	-0.09	-3.89	-1.13	-3.59	-1.49	-2.04	1.98	12800	96.3	Highly soluble	2.37	31400	236	Highly soluble	1.31	2730	20.5	Soluble	High	No	No	No	No	No	No	No	-9.87	0	4	0	0	3	0.56	0	0	1	1.8
XLGB-284	CC[C@@H]([C@@H](C(=O)O)N)C	C6H13NO2	131.17	9	0	0.83	3	3	2	35.44	63.32	1.29	-1.72	0.44	-1.82	-0.15	-0.39	0.63	557	4.25	Highly soluble	0.9	1050	8.02	Highly soluble	-0.14	96.1	0.733	Soluble	High	No	No	No	No	No	No	No	-8.32	0	2	0	0	1	0.55	0	0	1	1.65
XLGB-285	CCCCCCCCCCCCCCCC(=O)O	C16H32O2	256.42	18	0	0.94	14	2	1	80.8	37.3	3.85	7.17	5.55	4.19	5.25	5.2	-5.02	0.00243	9.49e-06	Moderately soluble	-7.77	4.31e-06	1.68e-08	Poorly soluble	-5.31	0.00125	4.88e-06	Moderately soluble	High	Yes	No	Yes	No	Yes	No	No	-2.77	1	0	1	0	1	0.85	0	0	2	2.31
XLGB-286	OC(=O)c1ccc(c(c1)O)O	C7H6O4	154.12	11	6	0	1	4	3	37.45	77.76	0.66	1.15	0.8	0.4	0.26	0.65	-1.86	2.14	0.0139	Very soluble	-2.38	0.646	0.00419	Soluble	-0.6	38.3	0.248	Soluble	High	No	No	No	No	No	No	Yes	-6.42	0	3	0	0	1	0.56	1	1	1	1.07
XLGB-287	Cc1ccc(cc1)C(C)C	C10H14	134.22	10	6	0.4	1	0	0	45.99	0	2.51	4.1	3.12	4.47	3.29	3.5	-3.63	0.0312	0.000233	Soluble	-3.81	0.021	0.000156	Soluble	-3.57	0.0358	0.000267	Soluble	Low	Yes	No	No	No	No	Yes	No	-4.21	1	1	0	0	2	0.55	0	0	2	1
XLGB-288	C/C(=C\COC(=O)C)/CCC=C(C)C	C12H20O2	196.29	14	0	0.58	6	2	0	60.13	26.3	2.83	4.04	3.24	2.95	2.98	3.21	-3.21	0.122	0.000622	Soluble	-4.3	0.00993	5.06e-05	Moderately soluble	-2.52	0.597	0.00304	Soluble	High	Yes	No	No	No	No	No	No	-4.63	0	0	0	0	1	0.55	0	1	2	2.72
XLGB-289	CCCCC/C=C\C/C=C\CCCCCCCC(=O)O	C18H32O2	280.45	20	0	0.72	14	2	1	89.46	37.3	4.14	6.98	5.88	4.47	5.77	5.45	-5.05	0.00249	8.87e-06	Moderately soluble	-7.58	7.42e-06	2.64e-08	Poorly soluble	-4.67	0.00593	2.11e-05	Moderately soluble	High	Yes	No	Yes	No	Yes	No	No	-3.05	1	1	1	1	1	0.85	0	1	2	3.1
XLGB-290	CC1=CC[C@@]2(CC1)C(=C)CCCC2(C)C	C15H24	204.35	15	0	0.73	0	0	0	68.52	0	3.2	4.67	4.87	4.63	4.59	4.39	-4.05	0.0183	8.93e-05	Moderately soluble	-4.4	0.00819	4.01e-05	Moderately soluble	-4.22	0.0124	6.07e-05	Moderately soluble	Low	No	No	No	No	Yes	No	No	-4.23	1	0	0	0	1	0.55	0	1	2	4.35
XLGB-291	CC1=CCC(=CC1)C(C)C	C10H16	136.23	10	0	0.6	1	0	0	47.12	0	2.73	4.5	3.31	3.27	2.95	3.35	-3.45	0.0479	0.000352	Soluble	-4.22	0.00819	6.01e-05	Moderately soluble	-2.23	0.806	0.00592	Soluble	Low	Yes	No	No	No	No	No	No	-3.94	0	1	0	0	2	0.55	0	1	2	3.11
XLGB-292	OC(=O)/C=C/c1ccc(c(c1)O)O	C9H8O4	180.16	13	6	0	2	4	3	47.16	77.76	0.97	1.15	1.09	0.7	0.75	0.93	-1.89	2.32	0.0129	Very soluble	-2.38	0.755	0.00419	Soluble	-0.71	35.1	0.195	Soluble	High	No	No	No	No	No	No	No	-6.58	0	0	0	0	1	0.56	1	2	1	1.81
XLGB-293	CC([C@H]1CCC(=C)C=C1)C	C10H16	136.23	10	0	0.6	1	0	0	47.12	0	2.65	3.44	3.16	3.27	2.84	3.07	-2.79	0.223	0.00164	Soluble	-3.12	0.103	0.000757	Soluble	-2.03	1.28	0.00942	Soluble	Low	Yes	No	No	No	No	No	No	-4.69	0	1	0	0	2	0.55	0	0	1	3.73
XLGB-294	OC(=O)CCC(=O)O	C4H6O4	118.09	8	0	0.5	3	4	2	24.89	74.6	0.32	-0.59	-0.06	-0.54	-0.63	-0.3	0	117	0.994	Very soluble	-0.51	36.9	0.312	Very soluble	0.61	486	4.11	Soluble	High	No	No	No	No	No	No	No	-7.44	0	3	0	0	2	0.85	0	0	1	1.29
XLGB-295	COc1cc(O)c2c(c1)C(=O)c1c(C2=O)c(O)cc(c1)C	C16H12O5	284.26	21	12	0.12	1	5	2	75.25	83.83	2.49	3.04	2.19	0.61	3.07	2.28	-3.87	0.038	0.000134	Soluble	-4.47	0.00972	3.42e-05	Moderately soluble	-4.6	0.00707	2.49e-05	Moderately soluble	High	No	No	Yes	No	Yes	No	Yes	-5.88	0	0	0	0	0	0.55	1	0	0	2.69
XLGB-296	CC1=CC[C@@H]2C[C@H]1C2(C)C	C10H16	136.23	10	0	0.8	0	0	0	45.22	0	2.63	4.48	3	4.29	2.79	3.44	-3.51	0.0424	0.000311	Soluble	-4.2	0.00859	6.31e-05	Moderately soluble	-2.23	0.806	0.00592	Soluble	Low	Yes	No	No	No	Yes	No	No	-3.95	1	1	0	0	2	0.55	0	1	2	4.44
XLGB-297	C[C@@H]1CC[C@]2([C@@H]([C@H]1C)C1=CC[C@H]3[C@@]([C@@]1(CC2)C)(C)CC[C@@H]1[C@]3(C)CC[C@@H](C1(C)C)O)C(=O)O	C30H48O3	456.7	33	0	0.9	1	3	2	136.91	57.53	3.95	7.34	7.09	5.82	5.46	5.93	-7.23	2.69e-05	5.89e-08	Poorly soluble	-8.38	1.92e-06	4.21e-09	Poorly soluble	-5.67	0.000972	2.13e-06	Moderately soluble	Low	No	No	No	No	No	No	No	-3.87	1	3	0	1	1	0.85	0	1	2	6.21
XLGB-298	O=C(c1cc(O)c(c(c1)O)O)Oc1cc(cc(c1O)O)C(=O)O	C14H10O9	322.22	23	12	0	4	9	6	74.92	164.75	0.84	1.08	1.13	0.02	-0.04	0.61	-2.64	0.738	0.00229	Soluble	-4.13	0.0238	7.38e-05	Moderately soluble	-1.08	26.7	0.083	Soluble	Low	No	No	Yes	No	No	No	No	-7.5	1	0	1	1	2	0.11	1	2	0	2.45
XLGB-299	CC1=CCCC(=CCC(=C(C)C)CC1)C	C15H24	204.35	15	0	0.6	0	0	0	70.68	0	3.27	5.77	5.18	4.53	4.25	4.6	-4.74	0.0037	1.81e-05	Moderately soluble	-5.54	0.000591	2.89e-06	Moderately soluble	-3.75	0.0363	0.000178	Soluble	Low	No	No	No	No	Yes	No	No	-3.45	1	0	0	0	2	0.55	0	1	2	3.65
XLGB-300	CCCCCCCC/C=C\CCCCCCCC(=O)O	C18H34O2	282.46	20	0	0.83	15	2	1	89.94	37.3	4.27	7.64	6.11	4.57	5.95	5.71	-5.41	0.00109	3.85e-06	Moderately soluble	-8.26	1.54e-06	5.46e-09	Poorly soluble	-5.39	0.00114	4.04e-06	Moderately soluble	High	No	No	Yes	No	Yes	No	No	-2.6	1	1	1	1	1	0.85	0	1	2	3.07
XLGB-301	CCCCCCCCCCCCCCCCCC(=O)O	C18H36O2	284.48	20	0	0.94	16	2	1	90.41	37.3	4.3	8.23	6.33	4.67	6.13	5.93	-5.73	0.000526	1.85e-06	Moderately soluble	-8.87	3.8e-07	1.33e-09	Poorly soluble	-6.11	0.000219	7.71e-07	Poorly soluble	High	No	No	Yes	No	No	No	No	-2.19	1	1	1	1	2	0.85	0	0	2	2.54
XLGB-302	CCCCCCCCCCCCCCCC	C16H34	226.44	16	0	1	13	0	0	79.03	0	4.67	8.28	6.49	6.44	6.21	6.42	-5.6	0.000566	2.5e-06	Moderately soluble	-8.14	1.63e-06	7.19e-09	Poorly soluble	-6.33	0.000106	4.69e-07	Poorly soluble	Low	No	No	Yes	No	No	No	No	-1.8	1	1	1	1	2	0.55	0	0	3	2.26
XLGB-303	CCCCCCCCCCCCCCCCCCCCC	C21H44	296.57	21	0	1	18	0	0	103.06	0	5.85	10.99	8.44	7.6	8.43	8.26	-7.41	1.14e-05	3.85e-08	Poorly soluble	-10.96	3.29e-09	1.11e-11	Insoluble	-8.34	1.37e-06	4.61e-09	Poorly soluble	Low	No	No	Yes	No	No	No	No	-0.31	1	1	1	1	3	0.55	0	0	2	2.84
XLGB-304	CC1=CC[C@@](CC1)(O)C(C)C	C10H18O	154.25	11	0	0.8	1	1	1	48.8	20.23	2.51	3.26	2.5	2.3	2.44	2.6	-2.78	0.254	0.00164	Soluble	-3.36	0.0675	0.000438	Soluble	-1.91	1.92	0.0124	Soluble	High	Yes	No	No	No	No	No	No	-4.93	0	1	0	0	2	0.55	0	1	1	3.28
XLGB-305	C=C/C(=C/C/C=C(/CCC=C(C)C)\C)/C	C15H24	204.35	15	0	0.47	6	0	0	72.32	0	3.89	6.12	5.2	4.84	4.76	4.96	-4.57	0.00554	2.71e-05	Moderately soluble	-5.9	0.000256	1.25e-06	Moderately soluble	-3.37	0.0882	0.000432	Soluble	Low	No	No	Yes	No	Yes	No	No	-3.2	1	0	0	0	2	0.55	0	2	2	3.72
XLGB-306	CC1=C[C@@H]2[C@@H](CC1)[C@](C)(O)CC[C@H]2C(C)C	C15H26O	222.37	16	0	0.87	1	1	1	70.72	20.23	3.15	3.34	3.78	3.67	3.22	3.43	-3.26	0.123	0.000554	Soluble	-3.44	0.0804	0.000361	Soluble	-2.73	0.41	0.00185	Soluble	High	Yes	No	No	Yes	No	No	No	-5.29	0	0	0	0	1	0.55	0	1	1	4.29
XLGB-307	CC1=CC[C@]2([C@@H]1C2)C(C)C	C10H16	136.23	10	0	0.8	1	0	0	45.22	0	2.67	2.85	3	4.29	2.95	3.15	-2.41	0.525	0.00385	Soluble	-2.51	0.422	0.0031	Soluble	-2.23	0.806	0.00592	Soluble	Low	Yes	No	No	No	No	No	No	-5.11	1	1	0	0	2	0.55	0	1	1	3.99
XLGB-308	C=C[C@](OC(=O)C)(CCC=C(C)C)C	C12H20O2	196.29	14	0	0.58	6	2	0	60.17	26.3	3.11	3.93	3.24	2.95	2.98	3.24	-3.14	0.143	0.00073	Soluble	-4.18	0.0129	6.58e-05	Moderately soluble	-2.52	0.597	0.00304	Soluble	High	Yes	No	No	No	No	No	No	-4.71	0	0	0	0	1	0.55	0	1	2	2.75
XLGB-309	CCCCCCCC/C=C\CCCCCCCCO	C18H36O	268.48	19	0	0.89	15	1	1	89.33	20.23	4.73	7.45	6.02	4.79	6.36	5.87	-5.21	0.00166	6.19e-06	Moderately soluble	-7.71	5.27e-06	1.96e-08	Poorly soluble	-5.86	0.000375	1.4e-06	Moderately soluble	High	No	No	Yes	No	No	No	No	-2.65	1	1	1	1	2	0.55	0	1	2	3.26
XLGB-310	C=C[C@@]1(C)CC[C@@H](C[C@@H]1C(=C)C)C(=C)C	C15H24	204.35	15	0	0.6	3	0	0	70.42	0	3.4	6.11	4.75	4.53	4.5	4.66	-4.76	0.00357	1.74e-05	Moderately soluble	-5.89	0.000262	1.28e-06	Moderately soluble	-3.58	0.0536	0.000262	Soluble	Low	No	No	No	Yes	Yes	No	No	-3.21	1	0	0	0	2	0.55	0	1	2	3.63
XLGB-311	CCCCCCCCCCCCCCCCCC	C18H38	254.49	18	0	1	15	0	0	88.64	0	5.23	9.37	7.27	6.92	7.1	7.18	-6.33	0.000119	4.67e-07	Poorly soluble	-9.27	1.35e-07	5.32e-10	Poorly soluble	-7.13	1.86e-05	7.33e-08	Poorly soluble	Low	No	No	Yes	No	No	No	No	-1.2	1	1	1	1	2	0.55	0	0	2	2.49
XLGB-312	C[C@@H]1COC2=C1C(=O)C(=O)c1c2ccc2c1CCC=C2C	C18H16O3	280.32	21	6	0.33	0	3	0	80.76	43.37	2.76	2.55	3.18	2.05	4.27	2.96	-3.4	0.113	0.000402	Soluble	-3.11	0.219	0.00078	Soluble	-4.95	0.00317	1.13e-05	Moderately soluble	High	Yes	No	Yes	Yes	Yes	No	Yes	-6.2	0	0	0	0	0	0.85	2	1	0	3.94
XLGB-313	CC[C@H](C(C)C)/C=C/[C@H]([C@H]1CC[C@@H]2[C@]1(C)CC[C@H]1[C@H]2CC=C2[C@]1(C)CC[C@@H](C2)O)C	C29H48O	412.69	30	0	0.86	5	1	1	132.75	20.23	5.03	8.56	7.8	6.62	6.86	6.98	-7.46	1.43e-05	3.46e-08	Poorly soluble	-8.86	5.71e-07	1.38e-09	Poorly soluble	-5.47	0.0014	3.39e-06	Moderately soluble	Low	No	No	No	No	Yes	No	No	-2.74	1	3	0	1	2	0.55	0	1	2	6.21
XLGB-314	CC(=CCOc1c2ccoc2cc2c1ccc(=O)o2)C	C16H14O4	270.28	20	13	0.19	3	4	0	77.5	52.58	3.07	3.43	3.88	2.14	3.99	3.3	-3.96	0.0297	0.00011	Soluble	-4.21	0.0165	6.1e-05	Moderately soluble	-5.51	0.000833	3.08e-06	Moderately soluble	High	Yes	No	Yes	Yes	Yes	No	No	-5.51	0	0	0	0	0	0.55	0	2	0	3.24
XLGB-315	O=C(O[C@@H]1C[C@@](O)(C[C@H]([C@H]1O)O)C(=O)O)/C=C/c1ccc(c(c1)O)O	C16H18O9	354.31	25	6	0.38	5	9	6	83.5	164.75	0.87	-0.42	-0.75	-1.05	-0.61	-0.39	-1.62	8.5	0.024	Very soluble	-2.58	0.942	0.00266	Soluble	0.4	894	2.52	Soluble	Low	No	No	No	No	No	No	No	-8.76	1	1	1	1	2	0.11	1	2	1	4.16
XLGB-316	CC(=O)O[C@H]1CC[C@]2([C@H](C1(C)C)CC[C@@]1([C@@H]2CC=C2[C@@]1(C)CC[C@@]1([C@H]2CC(C)(C)CC1)C(=O)O)C)C	C32H50O4	498.74	36	0	0.88	3	4	1	146.39	63.6	3.71	8.06	7.8	6.06	6.36	6.4	-7.81	7.69e-06	1.54e-08	Poorly soluble	-9.25	2.8e-07	5.61e-10	Poorly soluble	-6.73	9.33e-05	1.87e-07	Poorly soluble	Low	No	No	No	No	Yes	No	No	-3.62	1	4	0	1	1	0.85	0	1	2	6.14
XLGB-317	CC1=CCC(C)(C)C=CCC(=CCC1)C	C15H24	204.35	15	0	0.6	0	0	0	70.42	0	3.27	4.55	5.04	4.53	3.91	4.26	-3.97	0.0217	0.000106	Soluble	-4.27	0.0109	5.34e-05	Moderately soluble	-3.52	0.0619	0.000303	Soluble	Low	No	No	No	No	Yes	No	No	-4.32	1	0	0	0	1	0.55	0	1	2	3.66
XLGB-318	C=C1CC[C@@H]2[C@H]([C@H]3[C@H]1CC[C@]3(C)O)C2(C)C	C15H24O	220.35	16	0	0.87	0	1	1	68.34	20.23	3.04	3.11	3.39	3.67	3.27	3.3	-3.17	0.151	0.000683	Soluble	-3.2	0.138	0.000626	Soluble	-2.96	0.239	0.00109	Soluble	High	Yes	No	No	Yes	No	No	No	-5.44	0	0	0	0	1	0.55	0	1	1	3.78
XLGB-319	O=C1C[C@H]2C(C)(C)CCC[C@]2(c2c1cc(C(C)C)c(c2)O)C	C20H28O2	300.44	22	6	0.65	1	2	1	92.06	37.3	3.34	5.62	5.19	3.9	5.19	4.65	-5.38	0.00125	4.18e-06	Moderately soluble	-6.17	0.000205	6.82e-07	Poorly soluble	-5.65	0.000674	2.24e-06	Moderately soluble	High	Yes	No	No	Yes	Yes	No	No	-4.14	0	0	0	0	1	0.55	0	0	1	3.45
XLGB-320	CCCCCCCCCCCCCCCCCCCCCCCCCCC	C27H56	380.73	27	0	1	24	0	0	131.9	0	7.32	14.24	10.78	8.86	11.09	10.46	-9.59	9.84e-08	2.58e-10	Poorly soluble	-14.33	1.79e-12	4.7e-15	Insoluble	-10.71	7.41e-09	1.95e-11	Insoluble	Low	No	Yes	No	No	No	No	No	1.49	1	3	1	1	3	0.55	0	0	3	3.56
XLGB-321	CCCCCCCCCCCCCCCCCCCCCCCCC	C25H52	352.68	25	0	1	22	0	0	122.29	0	6.81	13.16	10	8.45	10.2	9.72	-8.87	4.81e-07	1.36e-09	Poorly soluble	-13.21	2.19e-11	6.2e-14	Insoluble	-9.92	4.21e-08	1.19e-10	Poorly soluble	Low	No	Yes	No	No	No	No	No	0.89	1	2	1	1	3	0.55	0	0	3	3.32
XLGB-322	O=C1c2c3C=CCC(c3ccc2c2c(C1=O)c(C)co2)(C)C	C19H16O3	292.33	22	11	0.26	0	3	0	85.02	47.28	2.69	4.04	4.22	2.16	4.96	3.61	-4.57	0.00791	2.71e-05	Moderately soluble	-4.74	0.00536	1.83e-05	Moderately soluble	-6.24	0.000168	5.75e-07	Poorly soluble	High	Yes	No	Yes	Yes	Yes	No	Yes	-5.21	0	0	0	0	0	0.55	2	1	1	3.65
XLGB-323	C[C@@H](CCC[C@]1(C)CCc2c(O1)c(C)c(c(c2C)O)C)CCC[C@@H](CCCC(C)C)C	C29H50O2	430.71	31	6	0.79	12	2	1	139.27	29.46	6.04	10.7	8.84	6.14	9.75	8.29	-8.6	1.08e-06	2.5e-09	Poorly soluble	-11.27	2.3e-09	5.33e-12	Insoluble	-9.16	2.97e-07	6.89e-10	Poorly soluble	Low	No	Yes	No	No	No	No	No	-1.33	1	3	1	1	1	0.55	0	0	3	5.17
XLGB-324	OC(=O)[C@H]1O[C@@H](Oc2cc3oc(cc(=O)c3c(c2O)O)c2ccccc2)[C@@H]([C@H]([C@@H]1O)O)O	C21H18O11	446.36	32	16	0.24	4	11	6	106.72	187.12	1.75	1.11	0.14	-1.63	-0.1	0.25	-3.41	0.173	0.000387	Soluble	-4.63	0.0104	2.33e-05	Moderately soluble	-2.22	2.67	0.00598	Soluble	Low	No	Yes	No	No	No	No	No	-8.23	2	0	1	1	3	0.11	1	1	1	5.09
XLGB-325	CC1=C[C@H]2C(=C(C)CC[C@@H]2C(C)C)CC1	C15H24	204.35	15	0	0.73	1	0	0	69.04	0	3.41	3.8	4.73	4.63	4.12	4.14	-3.43	0.0751	0.000367	Soluble	-3.49	0.0655	0.00032	Soluble	-3.52	0.0619	0.000303	Soluble	Low	No	No	No	Yes	Yes	No	No	-4.85	1	0	0	0	1	0.55	0	1	2	4.14
XLGB-326	O[C@@H]1C[C@H]2C([C@]1(C)CC2)(C)C	C10H18O	154.25	11	0	1	0	1	1	46.6	20.23	2.46	2.72	2.19	2.45	2.27	2.42	-2.51	0.477	0.00309	Soluble	-2.8	0.245	0.00159	Soluble	-1.91	1.92	0.0124	Soluble	High	Yes	No	No	No	No	No	No	-5.31	0	1	0	0	2	0.55	0	0	1	3.43
XLGB-327	CC1=CCCC(=C)C=C[C@@H](CC1)C(C)C	C15H24	204.35	15	0	0.6	1	0	0	70.68	0	3.32	4.74	4.89	4.53	4.01	4.3	-4.03	0.0192	9.39e-05	Moderately soluble	-4.47	0.00693	3.39e-05	Moderately soluble	-3.32	0.0983	0.000481	Soluble	Low	No	No	No	No	Yes	No	No	-4.18	1	0	0	0	1	0.55	0	1	2	4.55
XLGB-328	OC[C@@H](C(=O)O)N	C3H7NO3	105.09	7	0	0.67	2	4	3	22.18	83.55	0.18	-3.07	-1.61	-3.91	-1.45	-1.97	1.57	3950	37.5	Highly soluble	1.88	7970	75.9	Highly soluble	1.3	2080	19.8	Soluble	High	No	No	No	No	No	No	No	-9.12	0	4	0	0	3	0.55	0	0	1	1.51
XLGB-329	C[C@H]([C@@H](C(=O)O)N)O	C4H9NO3	119.12	8	0	0.75	2	4	3	26.98	83.55	0.33	-2.94	-1.22	-3.46	-1.36	-1.73	1.41	3030	25.4	Highly soluble	1.75	6620	55.6	Highly soluble	1.25	2100	17.6	Soluble	High	No	No	No	No	No	No	No	-9.11	0	4	0	0	3	0.55	0	0	1	1.79
XLGB-330	O[C@@H]1C[C@@]2(C)[C@H](C([C@@H]1O)(C)C)CC[C@@]1([C@@H]2CC=C2[C@@]1(C)CC[C@@]1([C@H]2[C@](C)(O)[C@H](C)CC1)C(=O)O)C	C30H48O5	488.7	35	0	0.9	1	5	4	139.28	97.99	3.1	4.96	5.18	4.14	4.07	4.29	-5.93	0.000576	1.18e-06	Moderately soluble	-6.76	8.57e-05	1.75e-07	Poorly soluble	-4.48	0.0163	3.33e-05	Moderately soluble	High	No	Yes	No	No	No	No	No	-5.76	0	3	0	0	0	0.56	0	1	2	6.59
XLGB-331	N[C@H](C(=O)O)CSSC[C@H](C(=O)O)N	C6H12N2O4S2	240.3	14	0	0.67	7	6	4	55.1	177.24	0.43	-5.08	-0.81	-5.83	-1.33	-2.52	2.33	51700	215	Highly soluble	2	23900	99.6	Highly soluble	0.95	2170	9.02	Soluble	Low	No	No	No	No	No	No	No	-11.37	0	1	1	1	2	0.55	0	1	1	3.39
XLGB-332	C[C@@H]1CC[C@@]2(OC1)O[C@@H]1[C@H]([C@@H]2C)[C@@]2([C@H](C1)[C@@H]1CC[C@@H]3[C@]([C@H]1CC2)(C)CC[C@@H](C3)O)C	C27H44O3	416.64	30	0	1	0	3	1	122.07	38.69	4.5	6.49	5.79	5.08	4.3	5.23	-6.51	0.000128	3.08e-07	Poorly soluble	-7.1	3.32e-05	7.97e-08	Poorly soluble	-4.51	0.0129	3.1e-05	Moderately soluble	High	Yes	No	No	No	No	No	No	-4.23	1	2	0	0	1	0.55	0	0	2	6.88
XLGB-333	COC(=O)[C@H]1[C@H](Oc2c1c(/C=C/C(=O)O[C@@H](C(=O)O)Cc1ccc(c(c1)O)O)ccc2O)c1ccc(c(c1)O)O	C28H24O12	552.48	40	18	0.18	10	12	6	138.15	200.28	1.77	3.11	2.42	0.64	2.41	2.07	-4.9	0.00699	1.27e-05	Moderately soluble	-6.98	5.73e-05	1.04e-07	Poorly soluble	-3.83	0.0819	0.000148	Soluble	Low	No	No	No	No	No	No	No	-7.46	3	2	1	1	3	0.11	1	3	2	5.11
XLGB-334	CCCCCCCCCCCCCCCCCCO	C18H38O	270.49	19	0	1	16	1	1	89.8	20.23	4.86	8.2	6.24	4.93	6.54	6.15	-5.63	0.000638	2.36e-06	Moderately soluble	-8.49	8.85e-07	3.27e-09	Poorly soluble	-6.57	7.21e-05	2.67e-07	Poorly soluble	High	No	No	Yes	No	No	No	No	-2.13	1	1	1	1	3	0.55	0	0	2	2.52
XLGB-335	C[C@@H]1CC[C@@H]2[C@@]31CC[C@]([C@H](C3)C2(C)C)(C)O	C15H26O	222.37	16	0	1	0	1	1	68.56	20.23	2.94	3.88	3.61	3.81	3.4	3.53	-3.66	0.0483	0.000217	Soluble	-4	0.0221	9.95e-05	Moderately soluble	-3.18	0.146	0.000655	Soluble	High	Yes	No	No	No	Yes	No	No	-4.9	0	0	0	0	1	0.55	0	0	2	4.39
XLGB-336	N[C@H](C(=O)O)CC(C)C	C6H13NO2	131.17	9	0	0.83	3	3	2	35.44	63.32	1.14	-1.52	0.44	-1.82	-0.15	-0.38	0.5	417	3.18	Highly soluble	0.7	652	4.97	Highly soluble	-0.14	96.1	0.733	Soluble	High	No	No	No	No	No	No	No	-8.18	0	2	0	0	1	0.55	0	0	1	1.39
XLGB-337	CSCC[C@@H](C(=O)O)N	C5H11NO2S	149.21	9	0	0.8	4	3	2	38.22	88.62	1.12	-1.87	0.15	-2.2	-0.15	-0.59	0.68	709	4.75	Highly soluble	0.53	504	3.38	Highly soluble	-0.23	87.5	0.586	Soluble	High	No	No	No	No	No	No	No	-8.54	0	2	0	0	1	0.55	0	0	1	2.43
XLGB-338	C[C@@H]1CC[C@]2([C@@H]([C@H]1C)C1=CC[C@H]3[C@@]([C@@]1(CC2)C)(C)CC[C@@H]1[C@]3(C)C[C@@H](O)[C@@H](C1(C)C)O)C(=O)O	C30H48O4	472.7	34	0	0.9	1	4	3	138.08	77.76	3.6	6.37	6.06	4.97	4.56	5.11	-6.72	9.05e-05	1.91e-07	Poorly soluble	-7.79	7.59e-06	1.61e-08	Poorly soluble	-4.85	0.00668	1.41e-05	Moderately soluble	High	No	Yes	No	No	No	No	No	-4.66	1	3	0	1	1	0.56	0	1	2	6.34
XLGB-339	COc1ccc(cc1O)/C=C/C(=O)O	C10H10O4	194.18	14	6	0.1	3	4	2	51.63	66.76	1.79	1.51	1.39	1	1.26	1.39	-2.11	1.49	0.00768	Soluble	-2.52	0.586	0.00302	Soluble	-1.42	7.43	0.0383	Soluble	High	Yes	No	No	No	No	No	No	-6.41	0	0	0	0	1	0.85	0	1	1	1.9
XLGB-340	Cc1cc(O)c2c(c1)C(=O)c1c(C2=O)cccc1O	C15H10O4	254.24	19	12	0.07	0	4	2	68.76	74.6	2.26	4.08	2.18	0.92	3.04	2.5	-4.45	0.00894	3.52e-05	Moderately soluble	-5.35	0.00113	4.45e-06	Moderately soluble	-4.49	0.00832	3.27e-05	Moderately soluble	High	Yes	No	Yes	No	Yes	No	Yes	-4.95	0	0	0	0	0	0.55	1	0	1	2.46
XLGB-341	C[C@@H]1CC[C@]2([C@@H]([C@H]1C)C1=CC[C@H]3[C@@]([C@@]1(CC2)C)(C)CC[C@@H]1[C@]3(C)CC[C@H](C1(C)C)O)C	C30H50O	426.72	31	0	0.93	0	1	1	135.14	20.23	4.71	9.01	8.02	6.92	6.52	7.04	-8.16	2.94e-06	6.89e-09	Poorly soluble	-9.33	2.02e-07	4.72e-10	Poorly soluble	-6.71	8.23e-05	1.93e-07	Poorly soluble	Low	No	No	No	No	No	No	No	-2.51	1	3	0	1	2	0.55	0	1	2	6.17
XLGB-342	COc1c(O)cc(cc1OC)/C=C/C(=O)O	C11H12O5	224.21	16	6	0.18	4	5	2	58.12	75.99	1.85	1.46	1.4	0.73	1.33	1.36	-2.16	1.54	0.00686	Soluble	-2.66	0.488	0.00218	Soluble	-1.55	6.33	0.0282	Soluble	High	No	No	No	No	No	No	No	-6.63	0	0	0	0	0	0.56	0	1	1	2.17
XLGB-343	O=C1CCC(c2c1c1c(cc2)cc(c(c1O)O)C(C)C)(C)C	C19H22O3	298.38	22	10	0.42	1	3	2	89.92	57.53	3.14	4.56	4.63	2.86	4.69	3.97	-4.83	0.00438	1.47e-05	Moderately soluble	-5.49	0.000963	3.23e-06	Moderately soluble	-5.5	0.00095	3.18e-06	Moderately soluble	High	Yes	No	Yes	Yes	No	Yes	No	-4.88	0	0	0	0	0	0.55	2	1	1	2.48
XLGB-344	O=C1c2c3CCC=C(c3ccc2c2c(C1=O)c(C)co2)C	C18H14O3	278.3	21	11	0.22	0	3	0	80.33	47.28	2.61	3.08	3.98	1.93	4.87	3.29	-3.89	0.0356	0.000128	Soluble	-3.74	0.0506	0.000182	Soluble	-6.09	0.000227	8.15e-07	Poorly soluble	High	Yes	No	Yes	Yes	Yes	Yes	Yes	-5.81	0	0	0	0	0	0.55	2	1	0	3.55
XLGB-345	CC(C1=Cc2ccc3c(c2C(=O)C1=O)C=CCC3(C)C)C	C19H20O2	280.36	21	6	0.37	1	2	0	86.48	34.14	2.83	4.58	3.97	3.16	4.86	3.88	-4.61	0.0069	2.46e-05	Moderately soluble	-5.02	0.00267	9.53e-06	Moderately soluble	-5.26	0.00154	5.51e-06	Moderately soluble	High	Yes	No	No	Yes	Yes	No	Yes	-4.76	0	0	0	0	0	0.55	2	1	1	3.29
XLGB-346	CCCCCCCCCCCCCCCCCCCCCOC=O	C22H44O2	340.58	24	0	0.95	21	2	0	109.54	26.3	5.7	10.59	7.59	5.58	8.19	7.53	-7.24	1.97e-05	5.79e-08	Poorly soluble	-11.09	2.75e-09	8.08e-12	Insoluble	-8.02	3.26e-06	9.57e-09	Poorly soluble	Low	No	No	Yes	No	No	No	No	-0.86	1	1	1	1	2	0.55	0	1	2	2.95
XLGB-347	C[C@@H]1COC2=C1C(=O)c1c(C2=O)c2C(=O)CCC(c2cc1)(C)C	C19H18O4	310.34	23	6	0.42	0	4	0	84.99	60.44	2.16	2.98	3.24	1.43	4.45	2.85	-3.83	0.0454	0.000146	Soluble	-3.91	0.0379	0.000122	Soluble	-5.45	0.00111	3.57e-06	Moderately soluble	High	Yes	Yes	Yes	Yes	Yes	No	Yes	-6.08	0	0	0	0	0	0.85	1	0	0	3.99
XLGB-348	CC(C1=Cc2ccc3c(c2C(=O)C1=O)cccc3C)C	C18H16O2	264.32	20	10	0.22	1	2	0	81.71	34.14	2.56	4.24	3.84	2.81	4.85	3.66	-4.45	0.00929	3.52e-05	Moderately soluble	-4.67	0.00568	2.15e-05	Moderately soluble	-5.92	0.000316	1.19e-06	Moderately soluble	High	Yes	No	Yes	Yes	Yes	Yes	No	-4.9	0	0	0	0	0	0.55	2	1	1	3.07
XLGB-349	C[C@@H]1CC[C@]2([C@@H]([C@H]1C)C1=CC[C@H]3[C@@]([C@@]1(CC2)C)(C)CC[C@@H]1[C@]3(C)C[C@@H](O)[C@H](C1(C)C)O)C(=O)O	C30H48O4	472.7	34	0	0.9	1	4	3	138.08	77.76	3.54	6.37	6.06	4.97	4.56	5.1	-6.72	9.05e-05	1.91e-07	Poorly soluble	-7.79	7.59e-06	1.61e-08	Poorly soluble	-4.85	0.00668	1.41e-05	Moderately soluble	High	No	Yes	No	No	No	No	No	-4.66	1	3	0	1	1	0.56	0	1	2	6.34
XLGB-350	OCC(=O)c1ccc(c(c1)O)O	C8H8O4	168.15	12	6	0.12	2	4	3	41.84	77.76	0.81	0.66	0.27	-0.34	0.59	0.4	-1.54	4.89	0.0291	Very soluble	-1.87	2.27	0.0135	Very soluble	-1.02	16.1	0.0957	Soluble	High	No	No	No	No	No	No	Yes	-6.86	0	0	0	0	1	0.55	1	1	1	1.23
XLGB-351	O=C[C@H](/C=C(/CCC=C(C)C)\C)O	C11H18O2	182.26	13	0	0.55	5	2	1	55.4	37.3	2.18	2.63	2.24	1.86	2.38	2.26	-2.3	0.92	0.00505	Soluble	-3.06	0.157	0.000864	Soluble	-1.45	6.42	0.0352	Soluble	High	Yes	No	No	No	No	No	No	-5.54	0	0	0	0	1	0.55	0	2	1	3.38
XLGB-352	O=C1c2c3[C@H](O)CCC(c3ccc2c2c(C1=O)c(C)co2)(C)C	C19H18O4	310.34	23	11	0.37	0	4	1	85.86	67.51	2.37	2.85	3.41	1.39	4.46	2.9	-3.91	0.0379	0.000122	Soluble	-3.93	0.0368	0.000118	Soluble	-5.89	0.000395	1.27e-06	Moderately soluble	High	Yes	Yes	Yes	Yes	No	Yes	Yes	-6.17	0	0	0	0	0	0.55	2	1	0	4.17
XLGB-353	O[C@H]1CCc2c(C1(C)C)ccc1c2C(=O)C(=O)c2c1occ2C	C19H18O4	310.34	23	11	0.37	0	4	1	85.86	67.51	2.54	2.99	3.22	1.39	4.46	2.92	-4	0.0309	9.96e-05	Moderately soluble	-4.07	0.0263	8.48e-05	Moderately soluble	-5.89	0.000395	1.27e-06	Moderately soluble	High	Yes	Yes	Yes	Yes	Yes	Yes	Yes	-6.07	0	0	0	0	0	0.55	2	1	0	4.14
XLGB-354	CC([C@@]12CC[C@@]([C@H]2C1)(C)O)C	C10H18O	154.25	11	0	1	1	1	1	46.9	20.23	2.35	2.12	2.19	2.45	2.44	2.31	-2.07	1.33	0.00859	Soluble	-2.18	1.03	0.00667	Soluble	-1.91	1.92	0.0124	Soluble	High	Yes	No	No	No	No	No	No	-5.74	0	1	0	0	2	0.55	0	0	1	2.82
XLGB-355	OC(=O)/C=C/c1ccc(c2c1cc(o2)c1ccc(c(c1)O)O)O	C17H12O6	312.27	23	15	0	3	6	4	84.39	111.13	1.86	2.87	3.21	0.97	2.44	2.27	-3.87	0.0422	0.000135	Soluble	-4.86	0.00428	1.37e-05	Moderately soluble	-3.53	0.093	0.000298	Soluble	High	No	No	No	No	No	No	No	-6.17	0	0	0	0	0	0.56	1	2	0	3.17
XLGB-356	CC(C1=Cc2ccc3c(c2C(=O)C1=O)CCCC3=C)C	C18H18O2	266.33	20	6	0.33	1	2	0	81.79	34.14	2.7	3.86	3.73	2.93	5.05	3.65	-4.08	0.0222	8.34e-05	Moderately soluble	-4.27	0.0142	5.33e-05	Moderately soluble	-5.36	0.00118	4.42e-06	Moderately soluble	High	Yes	No	Yes	Yes	Yes	No	Yes	-5.18	0	0	0	0	0	0.55	2	1	1	3.3
XLGB-357	OCCCc1cc(OC)c2c(c1)c(C=O)c(o2)c1ccc(c(c1)OC)O	C20H20O6	356.37	26	15	0.25	7	6	2	97.79	89.13	3.02	2.97	3.56	0.93	4.38	2.97	-3.89	0.0464	0.00013	Soluble	-4.5	0.0111	3.13e-05	Moderately soluble	-6.03	0.000333	9.35e-07	Poorly soluble	High	No	No	Yes	Yes	Yes	Yes	Yes	-6.37	0	0	0	0	0	0.55	0	1	1	3.4
XLGB-358	OC[C@H]1O[C@@H](O[C@H]2OC=C([C@H]3[C@@H]2[C@@](C)(OC(=O)C)C[C@@H]3OC(=O)c2cc(OC)c(c(c2)OC)O)C(=O)OC)[C@@H]([C@H]([C@@H]1O)O)O	C28H36O16	628.58	44	6	0.61	12	16	5	142.95	226.2	4.32	-0.22	-0.88	-1.6	-0.87	0.15	-2.91	0.778	0.00124	Soluble	-4.07	0.0531	8.45e-05	Moderately soluble	-0.56	171	0.272	Soluble	Low	No	Yes	No	No	No	No	No	-10.29	2	4	2	1	3	0.11	0	1	2	6.62
XLGB-359	COC(=O)C1=CO[C@@H]([C@@H]2[C@H]1[C@@H](OC(=O)c1cc(OC)c(c(c1)OC)O)C[C@]2(C)OC(=O)C)O	C22H26O11	466.44	33	6	0.5	9	11	2	110.57	147.05	3.31	1.37	1.3	0.47	1.14	1.52	-3.14	0.341	0.000732	Soluble	-4.06	0.0405	8.69e-05	Moderately soluble	-2.37	2	0.0043	Soluble	Low	No	Yes	No	No	No	No	No	-8.17	1	0	1	1	1	0.56	0	1	2	5.32
XLGB-360	O=C1C[C@H]2C(C)(C)CCC[C@@]2(C2=C1C(=O)C(=C(C2=O)O)C(C)C)C	C20H26O4	330.42	24	0	0.65	1	4	1	92.62	71.44	2.5	4.17	3.71	1.82	4.19	3.28	-4.45	0.0117	3.55e-05	Moderately soluble	-5.38	0.00138	4.18e-06	Moderately soluble	-4.5	0.0104	3.15e-05	Moderately soluble	High	Yes	No	No	Yes	Yes	No	Yes	-5.35	0	0	0	0	0	0.85	1	2	1	4.65
XLGB-361	O[C@H]1C[C@H]2C(C)(C)CCC[C@@]2(C2=C1C=C(C(C)C)C(=O)C2=O)C	C20H28O3	316.43	23	0	0.7	1	3	1	92.01	54.37	2.81	3.78	3.61	2.76	4.1	3.41	-4.12	0.0242	7.63e-05	Moderately soluble	-4.62	0.00767	2.42e-05	Moderately soluble	-4.17	0.0213	6.75e-05	Moderately soluble	High	Yes	No	No	Yes	Yes	No	Yes	-5.55	0	0	0	0	0	0.55	2	2	1	5.2
XLGB-362	COC(=O)[C@H](Cc1ccc(c(c1)O)O)OC(=O)/C=C/c1ccc(c2c1[C@H](C(=O)O[C@H](C(=O)O)Cc1ccc(c(c1)O)O)[C@@H](O2)c1ccc(c(c1)O)O)O	C37H32O16	732.64	53	24	0.19	15	16	8	182.39	267.04	2.63	4.31	2.99	0.43	3.13	2.7	-6.44	0.000264	3.61e-07	Poorly soluble	-9.63	1.71e-07	2.34e-10	Poorly soluble	-5.09	0.006	8.18e-06	Moderately soluble	Low	No	No	No	No	No	No	No	-7.71	3	3	2	1	4	0.11	1	3	3	6.13
XLGB-363	C=C1CC[C@@H]2O[C@@]2(CC[C@@H]2[C@H]1CC2(C)C)C	C15H24O	220.35	16	0	0.87	0	1	0	68.27	12.53	3.11	3.56	3.94	3.67	4.07	3.67	-3.45	0.0784	0.000356	Soluble	-3.51	0.0683	0.00031	Soluble	-3.51	0.0681	0.000309	Soluble	High	Yes	No	No	Yes	Yes	No	No	-5.12	0	0	0	0	1	0.55	0	2	2	4.35
XLGB-364	O=Cc1cccc2c1ccc1c2C(=O)C(=O)c2c1occ2C	C18H10O4	290.27	22	15	0.06	1	4	0	80.66	64.35	1.91	2.79	3.6	0.9	4.64	2.77	-3.84	0.0424	0.000146	Soluble	-3.8	0.0462	0.000159	Soluble	-6.46	0.0001	3.45e-07	Poorly soluble	High	Yes	No	Yes	Yes	Yes	No	Yes	-6.09	0	0	0	0	0	0.55	2	2	0	3.25
XLGB-365	O[C@H]1CCc2c(C1=C)ccc1c2C(=O)C(=O)c2c1occ2C	C18H14O4	294.3	22	11	0.22	0	4	1	81.49	67.51	2.25	2.02	2.95	1.08	4.25	2.51	-3.31	0.145	0.000493	Soluble	-3.07	0.253	0.000861	Soluble	-5.53	0.000877	2.98e-06	Moderately soluble	High	Yes	Yes	Yes	Yes	No	Yes	Yes	-6.66	0	0	0	0	0	0.55	2	1	0	3.97
XLGB-366	O=C(O[C@@H](C(=O)O)Cc1ccc(c(c1)O)O)/C=C/c1ccc(c2c1[C@H](C(=O)O[C@@H](C(=O)O)Cc1ccc(c(c1)O)O)[C@H](O2)c1ccc(c(c1)O)O)O	C36H30O16	718.61	52	24	0.17	14	16	9	178.07	278.04	1.65	3.98	2.9	0.25	2.57	2.27	-6.22	0.000433	6.02e-07	Poorly soluble	-9.52	2.17e-07	3.02e-10	Poorly soluble	-4.41	0.0282	3.93e-05	Moderately soluble	Low	No	No	No	No	No	No	No	-7.86	3	3	2	1	4	0.11	1	3	3	6
XLGB-367	O=C1c2c3CCCC(=C)c3ccc2c2c(C1=O)c(C)co2	C18H14O3	278.3	21	11	0.22	0	3	0	80.33	47.28	2.59	3.32	3.98	1.93	5.16	3.4	-4.04	0.0251	9.02e-05	Moderately soluble	-3.99	0.0285	0.000103	Soluble	-6.34	0.000128	4.6e-07	Poorly soluble	High	Yes	No	Yes	Yes	Yes	Yes	Yes	-5.64	0	0	0	0	0	0.55	2	1	0	3.5
XLGB-368	Cc1coc2c1C(=O)C(=O)c1c2ccc2c1CCC=C(C)c1ccc3c(c1CCCC2=C)C(=O)C(=O)c1c3occ1C	C36H28O6	556.6	42	22	0.22	0	6	0	160.66	94.56	3.97	6.4	7.97	2.48	9	5.96	-7.71	1.08e-05	1.95e-08	Poorly soluble	-8.18	3.69e-06	6.63e-09	Poorly soluble	-12.31	2.72e-10	4.89e-13	Insoluble	Low	No	No	No	No	No	No	No	-5.15	1	3	0	1	1	0.55	2	1	2	5.33
XLGB-369	O=C1[C@@H]2OC(=O)[C@]3([C@@H]1C(C)(C)CCC3)c1c2cc(C(C)C)c(c(c1=O)C(=O)C)O	C23H26O6	398.45	29	7	0.57	2	6	1	107.47	97.74	2.67	3.05	3	1.71	4.78	3.04	-4.28	0.021	5.27e-05	Moderately soluble	-4.77	0.00679	1.7e-05	Moderately soluble	-5.53	0.00118	2.96e-06	Moderately soluble	High	No	Yes	No	No	Yes	No	Yes	-6.57	0	0	0	0	0	0.55	0	0	1	5.21
XLGB-370	CC(C1=C[C@]23[C@](C1=O)(O)C(=O)O[C@@H]3C1=CCCC([C@H]1CC2)(C)C)C	C20H26O4	330.42	24	0	0.7	1	4	1	91.01	63.6	2.94	3.34	2.95	2.72	3.45	3.08	-3.93	0.0391	0.000118	Soluble	-4.35	0.0147	4.44e-05	Moderately soluble	-3.56	0.0914	0.000277	Soluble	High	Yes	No	No	No	Yes	No	No	-5.94	0	0	0	0	0	0.55	0	2	0	5.47
XLGB-371	CO[C@@H]1C[C@@H]2C(=CCCC2(C)C)Cc2c1cc(C(C)C)c(c2O)O	C21H30O3	330.46	24	6	0.62	2	3	2	99.19	49.69	3.42	4.61	4.89	3.51	4.4	4.17	-4.85	0.00471	1.43e-05	Moderately soluble	-5.38	0.00138	4.18e-06	Moderately soluble	-4.72	0.00628	1.9e-05	Moderately soluble	High	Yes	Yes	No	No	No	Yes	No	-5.04	0	0	0	0	0	0.55	1	2	1	4.36
XLGB-372	CC(c1cc2CC[C@H]3C(=Cc2c(c1O)O)C=CCC3(C)C)C	C20H26O2	298.42	22	6	0.5	1	2	2	93.62	40.46	3.47	5.32	5.04	4.09	4.35	4.45	-5.18	0.00198	6.64e-06	Moderately soluble	-5.92	0.000358	1.2e-06	Moderately soluble	-4.37	0.0126	4.24e-05	Moderately soluble	High	Yes	No	No	Yes	Yes	No	Yes	-4.34	0	0	0	0	1	0.55	1	1	1	4.13
XLGB-373	OCc1coc2c1C(=O)C(=O)c1c2ccc2c1CCCC2(C)C	C19H18O4	310.34	23	11	0.37	1	4	1	85.86	67.51	2.34	3.08	3.28	1.39	4.75	2.97	-3.99	0.0316	0.000102	Soluble	-4.17	0.0212	6.84e-05	Moderately soluble	-6.14	0.000223	7.19e-07	Poorly soluble	High	Yes	Yes	Yes	Yes	Yes	Yes	Yes	-6.01	0	0	0	0	0	0.55	2	1	0	3.76
XLGB-374	OCc1coc2c1C(=O)C(=O)c1c2ccc2c1cccc2C	C18H12O4	292.29	22	15	0.11	1	4	1	81.4	67.51	2.18	2.44	3.13	0.97	4.33	2.61	-3.63	0.0688	0.000236	Soluble	-3.5	0.0922	0.000316	Soluble	-6.34	0.000133	4.55e-07	Poorly soluble	High	Yes	No	Yes	No	No	No	Yes	-6.35	0	0	0	0	0	0.55	2	1	0	3.39
XLGB-375	O=C1c2c3CCC[C@@](c3ccc2c2c(C1=O)c(C)co2)(C)O	C18H16O4	296.32	22	11	0.33	0	4	1	81.05	67.51	2.34	2.17	3.07	1.16	4.37	2.62	-3.41	0.114	0.000385	Soluble	-3.22	0.178	0.000602	Soluble	-5.75	0.000533	1.8e-06	Moderately soluble	High	Yes	Yes	Yes	Yes	No	Yes	Yes	-6.57	0	0	0	0	0	0.55	2	1	0	4.03
XLGB-376	O[C@@H]1CCc2c([C@]1(C)O)ccc1c2C(=O)C(=O)c2c1occ2C	C18H16O5	312.32	23	11	0.33	0	5	2	82.22	87.74	2.07	1.19	2.04	0.33	3.46	1.82	-2.88	0.412	0.00132	Soluble	-2.63	0.735	0.00235	Soluble	-4.93	0.00365	1.17e-05	Moderately soluble	High	No	Yes	Yes	No	No	No	No	-7.36	0	0	0	0	0	0.55	2	1	0	4.34
XLGB-377	OC[C@@H]1[C@H](O)CCc2c1ccc1c2C(=O)C(=O)c2c1occ2C	C18H16O5	312.32	23	11	0.33	1	5	2	82.33	87.74	2.07	1.77	2.02	0.33	3.35	1.91	-3.18	0.207	0.000662	Soluble	-3.23	0.184	0.000588	Soluble	-4.73	0.00582	1.86e-05	Moderately soluble	High	No	Yes	Yes	No	No	Yes	No	-6.95	0	0	0	0	0	0.55	2	1	0	4.34
XLGB-378	OC(=O)[C@H](Cc1ccc(c(c1)O)O)O	C9H10O5	198.17	14	6	0.22	3	5	4	48	97.99	0.12	-0.2	0.09	-0.04	0.17	0.03	-1.06	17.2	0.0867	Very soluble	-1.4	7.86	0.0397	Very soluble	-0.5	62.1	0.313	Soluble	High	No	No	No	No	No	No	No	-7.65	0	0	0	0	1	0.56	1	1	1	1.91
XLGB-379	CC([C@@H]1[C@H]2OCC(c3c2c2c(C1=O)ccc(c2cc3)C)(C)C)C	C21H24O2	308.41	23	10	0.48	1	2	0	94.62	26.3	3.44	4.98	4.64	3.65	5.64	4.47	-5.15	0.00221	7.16e-06	Moderately soluble	-5.27	0.00165	5.35e-06	Moderately soluble	-6.58	8.11e-05	2.63e-07	Poorly soluble	High	Yes	Yes	No	Yes	Yes	Yes	No	-4.65	0	0	0	0	0	0.55	0	0	1	3.96
XLGB-380	O=C(O[C@@H](C(=O)O)Cc1ccc(c(c1)O)O)/C=C/c1ccc(c2c1[C@@H](C(=O)O[C@@H](C(=O)O)Cc1ccc(c(c1)O)O)[C@H](O2)c1ccc(c(c1)O)O)O	C36H30O16	718.61	52	24	0.17	14	16	9	178.07	278.04	2.08	3.98	2.9	0.25	2.57	2.36	-6.22	0.000433	6.02e-07	Poorly soluble	-9.52	2.17e-07	3.02e-10	Poorly soluble	-4.41	0.0282	3.93e-05	Moderately soluble	Low	No	No	No	No	No	No	No	-7.86	3	3	2	1	4	0.11	1	3	3	6
XLGB-381	O=C(O[C@@H](C(=O)O)Cc1ccc(c(c1)O)O)/C=C/C1=C[C@H]2C=Cc3c(O[C@@H]2C(=C1)O)cc(c(c3)O)O	C26H22O10	494.45	36	12	0.15	7	10	6	127.46	173.98	1.56	3.09	2.97	0.75	1.36	1.94	-4.64	0.0114	2.31e-05	Moderately soluble	-6.41	0.000192	3.88e-07	Poorly soluble	-2.01	4.88	0.00986	Soluble	Low	No	No	No	No	Yes	No	No	-7.12	1	1	1	1	2	0.11	1	2	1	5.4
XLGB-382	CC(=CCCc1c(C)ccc2c1C(=O)C(=O)C(=C2)C(C)C)C	C20H24O2	296.4	22	6	0.4	4	2	0	92.73	34.14	3.32	5.21	4.59	3.39	5.88	4.48	-4.9	0.00375	1.27e-05	Moderately soluble	-5.67	0.000627	2.12e-06	Moderately soluble	-5.91	0.000365	1.23e-06	Moderately soluble	High	Yes	No	No	Yes	Yes	No	No	-4.41	0	0	0	0	1	0.55	2	2	1	3.53
XLGB-383	C=C[C@@](CC[C@@H]1[C@](C)(O)CC[C@@H]2[C@]1(C)CCCC2(C)C)(O)C	C20H36O2	308.5	22	0	0.9	4	2	2	95.43	40.46	3.54	4.93	4.7	3.93	4.64	4.35	-4.59	0.00785	2.54e-05	Moderately soluble	-5.52	0.000939	3.04e-06	Moderately soluble	-4.24	0.0179	5.79e-05	Moderately soluble	High	Yes	No	No	No	No	Yes	No	-4.68	0	0	0	0	0	0.55	0	1	1	4.3
XLGB-384	O=C[C@@]1(C)CCCc2c1ccc1c2C(=O)C(=O)c2c1occ2C	C19H16O4	308.33	23	11	0.32	1	4	0	84.9	64.35	2.35	2.81	3.43	1.31	5.05	2.99	-3.81	0.0478	0.000155	Soluble	-3.82	0.0468	0.000152	Soluble	-6.26	0.000168	5.46e-07	Poorly soluble	High	Yes	No	Yes	Yes	Yes	No	Yes	-6.19	0	0	0	0	0	0.55	2	2	0	4.06
XLGB-385	OCc1cccc2c1ccc1c2C(=O)C(=O)c2c1occ2C	C18H12O4	292.29	22	15	0.11	1	4	1	81.4	67.51	2.23	2.44	3.13	0.97	4.33	2.62	-3.63	0.0688	0.000236	Soluble	-3.5	0.0922	0.000316	Soluble	-6.34	0.000133	4.55e-07	Poorly soluble	High	Yes	No	Yes	No	No	No	Yes	-6.35	0	0	0	0	0	0.55	2	1	0	3.32
XLGB-386	CC(=O)C[C@@]1(O)C(=O)C2=C(c3c1c1CCCC(c1cc3)(C)C)OC[C@@H]2C	C22H26O4	354.44	26	6	0.55	2	4	1	100.38	63.6	3.06	3.66	3.32	2.18	4.99	3.44	-4.38	0.0147	4.15e-05	Moderately soluble	-4.68	0.00732	2.07e-05	Moderately soluble	-5.8	0.000566	1.6e-06	Moderately soluble	High	Yes	Yes	No	Yes	Yes	No	Yes	-5.86	0	0	0	0	0	0.85	0	0	2	4.82
XLGB-387	CC(=O)C[C@@]1(O)C(=O)C2=C(c3c1c1cccc(c1cc3)C)OC[C@@H]2C	C21H20O4	336.38	25	10	0.33	2	4	1	95.92	63.6	2.73	3.02	3.17	1.76	4.55	3.05	-3.99	0.0343	0.000102	Soluble	-4.02	0.0321	9.54e-05	Moderately soluble	-6	0.000336	1e-06	Moderately soluble	High	Yes	Yes	Yes	Yes	Yes	Yes	Yes	-6.21	0	0	0	0	0	0.85	0	0	0	4.48
XLGB-388	CCCCCCC/C=C\CCCCCCCOC(=O)C	C18H34O2	282.46	20	0	0.83	15	2	0	89.45	26.3	4.56	6.81	5.81	4.57	6.1	5.57	-4.89	0.00363	1.28e-05	Moderately soluble	-7.17	1.91e-05	6.76e-08	Poorly soluble	-5.69	0.000574	2.03e-06	Moderately soluble	High	Yes	No	Yes	No	No	No	No	-3.19	1	1	1	0	1	0.55	0	1	2	3.05
XLGB-389	CC(=C)CCCc1c(C)ccc2c1C(=O)C(=O)C(=C2)C(C)C	C20H24O2	296.4	22	6	0.4	5	2	0	92.73	34.14	3.12	5.52	4.59	3.39	6.05	4.53	-5.03	0.00278	9.39e-06	Moderately soluble	-6	0.000299	1.01e-06	Moderately soluble	-6.28	0.000154	5.2e-07	Poorly soluble	High	Yes	No	No	Yes	Yes	No	No	-4.19	0	0	0	0	1	0.55	2	2	1	3.54
XLGB-390	CC(C1=C2OC(c3c2c2c(C1=O)ccc(c2cc3)C)(C)C)C	C20H20O2	292.37	22	10	0.35	1	2	0	90.13	26.3	3.47	4.54	4.87	3.35	5.77	4.4	-4.78	0.00482	1.65e-05	Moderately soluble	-4.81	0.00448	1.53e-05	Moderately soluble	-6.74	5.32e-05	1.82e-07	Poorly soluble	High	Yes	Yes	Yes	Yes	Yes	Yes	Yes	-4.86	0	0	0	0	0	0.85	0	0	1	3.6
XLGB-391	O=C1O[C@H]2C[C@H]3[C@]1(CCCC3(C)C)c1c2cc(c(c1O)O)C(C)C	C20H26O4	330.42	24	6	0.65	1	4	2	92.83	66.76	2.89	4.38	3.96	3.25	4.05	3.71	-4.77	0.00565	1.71e-05	Moderately soluble	-5.5	0.00105	3.17e-06	Moderately soluble	-4.45	0.0116	3.52e-05	Moderately soluble	High	Yes	Yes	No	No	Yes	No	No	-5.21	0	0	0	0	0	0.55	1	1	1	4.88
XLGB-392	C[C@H]1COC2=C1C(=O)C(=O)c1c2ccc2c1CCCC2(C)C	C19H20O3	296.36	22	6	0.47	0	3	0	85.13	43.37	2.81	3.8	3.44	2.36	4.76	3.43	-4.27	0.0158	5.33e-05	Moderately soluble	-4.41	0.0117	3.93e-05	Moderately soluble	-5.57	0.000807	2.72e-06	Moderately soluble	High	Yes	Yes	Yes	Yes	Yes	No	Yes	-5.41	0	0	0	0	0	0.85	2	1	1	4.11
XLGB-393	C1CCCCCCCCCCCCC1	C14H28	196.37	14	0	1	0	0	0	67.3	0	3.35	5.18	5.46	5.54	4.46	4.8	-4.32	0.00938	4.78e-05	Moderately soluble	-4.93	0.00233	1.18e-05	Moderately soluble	-3.78	0.0324	0.000165	Soluble	Low	No	No	No	No	No	No	No	-3.82	1	0	0	0	3	0.55	0	0	2	2.42
XLGB-394	OC[C@H](C1=C(O)C(=O)c2c(C1=O)ccc1c2cccc1C)C	C18H16O4	296.32	22	10	0.22	2	4	2	83.87	74.6	2.34	2.83	2.97	1.08	3.72	2.59	-3.66	0.0642	0.000217	Soluble	-4.05	0.0261	8.82e-05	Moderately soluble	-5	0.00297	1e-05	Moderately soluble	High	Yes	No	Yes	Yes	Yes	No	No	-6.1	0	0	0	0	0	0.85	1	0	0	3.53
XLGB-395	CC(C1=C(O)C(=O)c2c(C1=O)ccc1c2cccc1C)C	C18H16O3	280.32	21	10	0.22	1	3	1	82.71	54.37	2.63	4.05	4	1.93	4.34	3.39	-4.42	0.0108	3.84e-05	Moderately soluble	-4.9	0.00356	1.27e-05	Moderately soluble	-5.56	0.000769	2.74e-06	Moderately soluble	High	Yes	No	Yes	Yes	Yes	No	Yes	-5.13	0	0	0	0	0	0.85	1	0	1	2.95
XLGB-396	CC1=C(O)C(=O)c2c(C1=O)ccc1c2cccc1C	C16H12O3	252.26	19	10	0.12	0	3	1	73.09	54.37	2.22	3.29	3.36	1.45	3.75	2.81	-3.87	0.0343	0.000136	Soluble	-4.11	0.0197	7.82e-05	Moderately soluble	-5.13	0.00185	7.35e-06	Moderately soluble	High	Yes	No	Yes	Yes	No	No	Yes	-5.5	0	0	0	0	0	0.85	1	0	0	2.76
XLGB-397	OC[C@]1(C)[C@@H](C)COC2=C1C(=O)c1c(C2=O)c2cccc(c2cc1)C	C21H20O4	336.38	25	10	0.33	1	4	1	95.43	63.6	2.16	3.74	3.45	1.76	4.56	3.13	-4.51	0.0104	3.08e-05	Moderately soluble	-4.77	0.00574	1.71e-05	Moderately soluble	-6.22	0.000203	6.04e-07	Poorly soluble	High	Yes	Yes	Yes	Yes	Yes	No	Yes	-5.7	0	0	0	0	0	0.85	1	0	1	4.54
XLGB-398	C[C@H]1CO[C@]2(C1)OCC(=O)c1c2ccc2c1cccc2C	C18H18O3	282.33	21	10	0.39	0	3	0	81.13	35.53	3.01	3.5	3.46	2.76	4.29	3.41	-4.15	0.0201	7.11e-05	Moderately soluble	-3.93	0.0332	0.000118	Soluble	-5.63	0.000659	2.33e-06	Moderately soluble	High	Yes	Yes	No	Yes	Yes	Yes	No	-5.54	0	0	0	0	0	0.55	0	0	0	4.25
XLGB-399	CC[C@H](C(C)C)CC[C@H]([C@H]1CC[C@@H]2[C@]1(C)CC[C@H]1[C@H]2CC=C2[C@]1(C)CC[C@@H](C2)O[C@@H]1O[C@H](CO)[C@H]([C@@H]([C@H]1O)O)O)C	C35H60O6	576.85	41	0	0.94	9	6	4	165.61	99.38	5.5	7.74	5.85	3.96	5.02	5.61	-7.7	1.15e-05	2e-08	Poorly soluble	-9.67	1.23e-07	2.14e-10	Poorly soluble	-4.4	0.0228	3.94e-05	Moderately soluble	Low	No	No	No	No	No	No	No	-4.32	1	4	0	0	1	0.55	0	1	3	8.02
XLGB-400	OC[C@@]12CCC(=C)[C@@H]([C@H]2C2=CC[C@H]3[C@@]([C@@]2(CC1)C)(C)CC[C@H]1[C@]3(C)CC[C@H](C1(C)C)O)C	C30H48O2	440.7	32	0	0.87	1	2	2	135.83	40.46	4.27	6.61	6.92	5.89	6.18	5.97	-6.67	9.41e-05	2.13e-07	Poorly soluble	-7.26	2.42e-05	5.49e-08	Poorly soluble	-6.37	0.000187	4.24e-07	Poorly soluble	Low	No	No	No	No	No	No	No	-4.3	1	3	0	1	1	0.55	0	1	2	6.32
XLGB-401	CC(C1=C(O)C(=O)c2c(C1=O)ccc1c2CCCC1(C)C)C	C19H22O3	298.38	22	6	0.47	1	3	1	87.16	54.37	3.06	4.69	4.15	2.36	4.76	3.8	-4.78	0.00495	1.66e-05	Moderately soluble	-5.56	0.000822	2.76e-06	Moderately soluble	-5.36	0.00129	4.33e-06	Moderately soluble	High	Yes	No	Yes	Yes	Yes	No	Yes	-4.79	0	0	0	0	0	0.85	1	0	1	3.29
XLGB-402	C[C@@H]1COC2=C1C(=O)c1c(C2=O)c2cccc(c2cc1)C	C18H14O3	278.3	21	10	0.22	0	3	0	80.11	43.37	2.53	3.62	3.45	1.93	4.35	3.18	-4.2	0.0176	6.33e-05	Moderately soluble	-4.22	0.0168	6.05e-05	Moderately soluble	-5.76	0.00048	1.73e-06	Moderately soluble	High	Yes	No	Yes	Yes	Yes	Yes	Yes	-5.43	0	0	0	0	0	0.85	1	0	1	3.75
XLGB-403	C[C@H]1COc2c1oc(=O)c1c2ccc2c1cccc2C	C17H14O3	266.29	20	14	0.24	0	3	0	79.11	39.44	2.91	3.59	3.75	3	4.54	3.56	-4.27	0.0143	5.36e-05	Moderately soluble	-4.1	0.0209	7.86e-05	Moderately soluble	-6.12	0.0002	7.52e-07	Poorly soluble	High	Yes	No	Yes	Yes	Yes	No	No	-5.38	0	0	0	0	0	0.55	0	1	1	3.51
XLGB-404	C[C@@H]1COC2=C1C(=O)C(=O)c1c2ccc2c1cccc2C	C18H14O3	278.3	21	10	0.22	0	3	0	80.68	43.37	2.46	3.16	3.29	1.93	4.35	3.04	-3.91	0.0343	0.000123	Soluble	-3.74	0.0505	0.000182	Soluble	-5.76	0.00048	1.73e-06	Moderately soluble	High	Yes	No	Yes	Yes	Yes	Yes	Yes	-5.75	0	0	0	0	0	0.85	2	1	0	3.74
XLGB-405	C=C[C@]1(C)CCCCC1(C(=C)C)C(=C)C	C15H24	204.35	15	0	0.6	3	0	0	70.16	0	3.2	6.57	4.89	4.53	4.9	4.82	-5.05	0.00183	8.95e-06	Moderately soluble	-6.37	8.74e-05	4.28e-07	Poorly soluble	-4.03	0.0191	9.33e-05	Moderately soluble	Low	No	No	No	No	Yes	No	No	-2.88	1	0	0	0	2	0.55	0	1	2	3.31
XLGB-406	COC(=O)[C@H](Cc1ccc(c(c1)O)O)OC(=O)/C=C/c1ccc(c2c1[C@H](C(=O)O[C@H](C(=O)OC)Cc1ccc(c(c1)O)O)[C@@H](O2)c1ccc(c(c1)O)O)O	C38H34O16	746.67	54	24	0.21	16	16	7	186.71	256.04	2.94	4.63	3.08	0.61	3.7	2.99	-6.66	0.000164	2.19e-07	Poorly soluble	-9.73	1.38e-07	1.85e-10	Poorly soluble	-5.77	0.00127	1.71e-06	Moderately soluble	Low	No	No	No	No	No	No	No	-7.57	3	3	2	1	5	0.17	1	3	3	6.26
XLGB-407	COC(=O)[C@@H](Cc1ccc(c(c1)O)O)OC(=O)/C=C/c1ccc(c2c1[C@@H](C(=O)OC)[C@H](O2)c1ccc(c(c1)O)O)O	C29H26O12	566.51	41	18	0.21	11	12	5	142.47	189.28	2.49	3.43	2.51	0.84	2.97	2.45	-5.11	0.00438	7.72e-06	Moderately soluble	-7.09	4.65e-05	8.22e-08	Poorly soluble	-4.51	0.0173	3.06e-05	Moderately soluble	Low	No	No	No	No	Yes	No	No	-7.32	2	2	2	1	2	0.17	1	3	2	5.24
XLGB-408	C[C@H]1CO[C@]2(C1)OCC(=O)[C@H]1[C@H]2C=Cc2c1cccc2C	C18H20O3	284.35	21	6	0.5	0	3	0	80.99	35.53	2.71	3.06	2.96	2.62	3.4	2.95	-3.74	0.0515	0.000181	Soluble	-3.47	0.0958	0.000337	Soluble	-4.13	0.0208	7.33e-05	Moderately soluble	High	Yes	No	No	No	Yes	Yes	No	-5.86	0	0	0	0	0	0.55	0	0	0	4.97
XLGB-409	CCOC(=O)[C@H]1[C@H](Oc2c1c(ccc2)/C=C/C(=O)O[C@@H](C(=O)O)Cc1ccccc1)c1ccc(cc1)O	C29H26O8	502.51	37	18	0.21	11	8	2	134.86	119.36	2.74	4.89	3.99	2.83	4.68	3.83	-5.67	0.00107	2.14e-06	Moderately soluble	-7.13	3.71e-05	7.38e-08	Poorly soluble	-6.59	0.000128	2.55e-07	Poorly soluble	High	No	Yes	No	No	Yes	No	Yes	-5.89	1	2	1	0	0	0.56	0	2	3	5.03
XLGB-410	CC(c1cc2CC[C@@H]3[C@](c2cc1O)(C)CCCC3(C)C)C	C20H30O	286.45	21	6	0.7	1	1	1	91.64	20.23	3.62	6.71	5.55	4.92	5.5	5.26	-5.99	0.000294	1.03e-06	Moderately soluble	-6.94	3.3e-05	1.15e-07	Poorly soluble	-5.77	0.000491	1.71e-06	Moderately soluble	High	Yes	No	No	Yes	Yes	Yes	No	-3.28	1	0	0	0	2	0.55	0	0	1	3.33
XLGB-411	C[C@@H]1COC2=C1C(=O)c1c(C2=O)c2CCCC(c2cc1)(C)C	C19H20O3	296.36	22	6	0.47	0	3	0	84.56	43.37	2.87	4.26	3.6	2.36	4.76	3.57	-4.56	0.00811	2.73e-05	Moderately soluble	-4.88	0.00388	1.31e-05	Moderately soluble	-5.57	0.000807	2.72e-06	Moderately soluble	High	Yes	No	Yes	Yes	Yes	No	Yes	-5.08	0	0	0	0	0	0.85	1	0	1	4.03
XLGB-412	O=C(O[C@H](C(=O)O)Cc1ccc(c(c1)O)O)/C=C\c1ccc(c2c1C=Cc1c(O2)cc(c(c1)O)O)O	C26H20O10	492.43	36	18	0.08	7	10	6	128.86	173.98	2.06	4.03	3.42	1.22	2.53	2.65	-5.34	0.00225	4.57e-06	Moderately soluble	-7.39	2.02e-05	4.1e-08	Poorly soluble	-3.82	0.075	0.000152	Soluble	Low	No	No	No	No	Yes	No	No	-6.44	1	1	1	1	2	0.11	1	3	2	4.54
XLGB-413	OC[C@@]1(C)CCCc2c1ccc1c2C(=O)c2c(C1=O)c(co2)C	C19H18O4	310.34	23	11	0.37	1	4	1	85.07	67.51	2.56	3.48	2.95	1.39	4.75	3.02	-4.24	0.0177	5.7e-05	Moderately soluble	-4.58	0.00816	2.63e-05	Moderately soluble	-6.14	0.000223	7.19e-07	Poorly soluble	High	Yes	Yes	Yes	Yes	Yes	Yes	Yes	-5.72	0	0	0	0	0	0.55	1	0	0	3.92
XLGB-414	O=C1c2c3CCCC(c3ccc2C(=O)c2c1occ2C)(C)C	C19H18O3	294.34	22	11	0.37	0	3	0	83.91	47.28	2.92	4.88	3.98	2.24	5.37	3.88	-5.11	0.00229	7.77e-06	Moderately soluble	-5.61	0.000726	2.47e-06	Moderately soluble	-6.71	5.77e-05	1.96e-07	Poorly soluble	High	Yes	No	Yes	Yes	Yes	Yes	Yes	-4.63	0	0	0	0	0	0.55	1	0	1	3.44
XLGB-415	Cc1coc2c1C(=O)c1c(C2=O)c2cccc(c2cc1)C	C18H12O3	276.29	21	15	0.11	0	3	0	79.45	47.28	2.52	4.25	3.83	1.82	4.95	3.47	-4.76	0.00481	1.74e-05	Moderately soluble	-4.95	0.00307	1.11e-05	Moderately soluble	-6.91	3.44e-05	1.24e-07	Poorly soluble	High	Yes	No	Yes	Yes	Yes	No	No	-4.97	0	0	0	0	0	0.55	1	0	1	3.23
XLGB-416	O=C(O[C@@H](C(=O)O)Cc1ccc(c(c1)O)O)/C=C/c1ccc(c2c1[C@H](C(=O)O)[C@H](O2)c1ccc(c(c1)O)O)O	C27H22O12	538.46	39	18	0.15	9	12	7	133.83	211.28	0.67	2.78	2.34	0.45	1.85	1.62	-4.68	0.0113	2.1e-05	Moderately soluble	-6.87	7.22e-05	1.34e-07	Poorly soluble	-3.14	0.387	0.000718	Soluble	Low	No	No	No	No	No	No	No	-7.61	3	2	1	1	3	0.11	1	2	2	4.98
XLGB-417	C=C[C@](CC[C@@]1(C)C(=C)CC[C@@H]2[C@]1(C)CCCC2(C)C)(O)C	C21H36O	304.51	22	0	0.81	4	1	1	98.3	20.23	3.94	6.26	5.89	4.97	5.92	5.4	-5.41	0.00119	3.91e-06	Moderately soluble	-6.47	0.000103	3.37e-07	Poorly soluble	-5.43	0.00113	3.72e-06	Moderately soluble	High	No	No	No	Yes	Yes	Yes	No	-3.71	1	1	0	1	2	0.55	0	1	1	4.15
XLGB-418	COC(=O)[C@@H](Cc1ccc(c(c1)O)O)OC(=O)/C=C\c1ccc(c(c1)O)O	C19H18O8	374.34	27	12	0.16	8	8	4	95.72	133.52	1.54	2.69	1.74	1.13	2.05	1.83	-3.66	0.0826	0.000221	Soluble	-5.15	0.00267	7.14e-06	Moderately soluble	-2.87	0.508	0.00136	Soluble	High	No	No	No	No	No	No	No	-6.67	0	0	0	1	0	0.55	1	3	2	3.52
XLGB-419	COC(=O)[C@@]1(C)CCCc2c1ccc1c2C(=O)C(=O)c2c1occ2C	C20H18O5	338.35	25	11	0.35	2	5	0	90.79	73.58	2.82	3.2	3.4	1.52	4.82	3.15	-4.15	0.0241	7.12e-05	Moderately soluble	-4.42	0.013	3.83e-05	Moderately soluble	-6.37	0.000143	4.23e-07	Poorly soluble	High	Yes	No	Yes	Yes	Yes	No	Yes	-6.09	0	0	0	0	0	0.55	2	1	0	4.18
XLGB-420	CC(C1=Cc2ccc(c3c2[C@@](C1=O)(O)C(C)(C)CCC3)C)C	C20H26O2	298.42	22	6	0.55	1	2	1	91.45	37.3	2.96	4.76	3.95	3.55	5.18	4.08	-4.82	0.00447	1.5e-05	Moderately soluble	-5.27	0.00159	5.32e-06	Moderately soluble	-5.63	0.000696	2.33e-06	Moderately soluble	High	Yes	No	No	Yes	Yes	No	Yes	-4.74	0	0	0	0	0	0.55	0	0	1	4.03
XLGB-421	CC(C1=C(O)C(=O)c2c(C1=O)ccc1c2C(=O)CCC1(C)C)C	C19H20O4	312.36	23	6	0.42	1	4	1	87.59	71.44	2.44	3.41	3.79	1.43	4.45	3.1	-4.05	0.0277	8.87e-05	Moderately soluble	-4.59	0.00803	2.57e-05	Moderately soluble	-5.25	0.00177	5.68e-06	Moderately soluble	High	Yes	No	Yes	Yes	Yes	No	Yes	-5.78	0	0	0	0	0	0.85	1	0	0	3.26
XLGB-422	C[C@H]1COC2=C1C(=O)C(=C1C2=CC(=O)C2=C1CCCC2(C)C)O	C19H20O4	312.36	23	0	0.47	0	4	1	85.89	63.6	2.76	2.15	3.32	1.51	3.46	2.64	-3.13	0.231	0.000739	Soluble	-3.12	0.238	0.000762	Soluble	-3.82	0.0468	0.00015	Soluble	High	Yes	Yes	No	Yes	Yes	No	No	-6.68	0	0	0	0	0	0.85	0	0	0	4.59
XLGB-423	O=c1cc2c(cc(c1O)C)[C@H]1OC[C@]32CCCC([C@@H]3C1)(C)C	C19H24O3	300.39	22	7	0.63	0	3	1	87.26	46.53	3.15	2.78	3.28	2.75	4.33	3.26	-3.69	0.0614	0.000205	Soluble	-3.41	0.116	0.000386	Soluble	-5.04	0.00271	9.04e-06	Moderately soluble	High	Yes	Yes	No	No	No	Yes	No	-6.16	0	0	0	0	0	0.55	0	0	0	4.58
XLGB-424	CC(C1=Cc2ccc3c(c2C(=O)C1=O)CCCC3(C)C)C	C19H22O2	282.38	21	6	0.47	1	2	0	86.16	34.14	2.84	4.88	4	3.24	5.27	4.04	-4.81	0.00437	1.55e-05	Moderately soluble	-5.33	0.00131	4.65e-06	Moderately soluble	-5.73	0.000531	1.88e-06	Moderately soluble	High	Yes	No	No	No	Yes	No	No	-4.56	0	0	0	0	0	0.55	2	1	1	3.44
XLGB-425	O=C1CCC(C2=CC=C3[C@@H]([C@H]12)C(=O)C(=CC3=O)O)(C)C	C16H16O4	272.3	20	0	0.44	0	4	1	73.17	71.44	1.91	1.22	2.07	0.8	2.19	1.64	-2.3	1.37	0.00505	Soluble	-2.32	1.31	0.00481	Soluble	-2.41	1.05	0.00387	Soluble	High	Yes	No	No	No	No	No	No	-7.09	0	0	0	0	0	0.85	0	0	0	4.48
XLGB-426	CC1=C(O)C(=O)c2c(C1=O)ccc1c2CCCC1(C)C	C17H18O3	270.32	20	6	0.41	0	3	1	77.55	54.37	2.62	3.93	3.51	1.89	4.17	3.22	-4.21	0.0165	6.11e-05	Moderately soluble	-4.77	0.00458	1.69e-05	Moderately soluble	-4.94	0.00311	1.15e-05	Moderately soluble	High	Yes	No	Yes	Yes	Yes	No	Yes	-5.16	0	0	0	0	0	0.85	1	0	1	3.09
XLGB-427	OC[C@H](C1=C(O)c2c(C(=O)C1=O)c1CCCC(c1cc2)(C)C)C	C19H22O4	314.38	23	6	0.47	2	4	2	88.9	74.6	2.18	3.02	2.96	1.51	4.15	2.76	-3.75	0.0555	0.000177	Soluble	-4.25	0.0176	5.6e-05	Moderately soluble	-4.8	0.00499	1.59e-05	Moderately soluble	High	Yes	Yes	No	Yes	No	No	No	-6.07	0	0	0	0	0	0.85	2	1	0	4.01
XLGB-428	Cc1cc2[C@H]3OC[C@@]4(c2cc1O)[C@@H](C3)C(C)(C)CCC4	C18H24O2	272.38	20	6	0.67	0	2	1	80.99	29.46	2.85	4.24	3.92	3.53	4.27	3.76	-4.42	0.0103	3.78e-05	Moderately soluble	-4.57	0.00734	2.69e-05	Moderately soluble	-4.73	0.00507	1.86e-05	Moderately soluble	High	Yes	Yes	No	No	Yes	Yes	No	-4.95	0	0	0	0	0	0.55	0	0	1	4.41
XLGB-429	O=C1c2c3CCCC(=O)c3ccc2c2c(C1=O)c(C)co2	C17H12O4	280.27	21	11	0.24	0	4	0	75.62	64.35	2.03	2.18	3.15	0.84	4.47	2.54	-3.34	0.128	0.000458	Soluble	-3.16	0.192	0.000684	Soluble	-5.84	0.000406	1.45e-06	Moderately soluble	High	Yes	No	Yes	Yes	No	No	Yes	-6.46	0	0	0	0	0	0.55	2	1	0	3.4
XLGB-430	OC(=O)C1=C[C@]2(OC(=O)C(=C2)C)[C@H]2OC[C@]31CCCC([C@@H]3C2)(C)C	C19H24O5	332.39	24	0	0.68	1	5	1	87.7	72.83	2.5	3.07	2.85	2.47	2.69	2.72	-3.77	0.0566	0.00017	Soluble	-4.27	0.018	5.42e-05	Moderately soluble	-2.92	0.399	0.0012	Soluble	High	Yes	Yes	No	No	No	No	No	-6.15	0	0	0	0	0	0.85	0	0	0	6.26
XLGB-431	O=C(O[C@@H](C(=O)O)Cc1ccc(c(c1)O)O)/C=C\c1ccc(c(c1CC(=O)O)O)O	C20H18O10	418.35	30	12	0.15	9	10	6	102.94	181.82	1.15	1.83	1.28	0.55	1.41	1.25	-3.29	0.215	0.000514	Soluble	-5.27	0.00225	5.39e-06	Moderately soluble	-1.91	5.19	0.0124	Soluble	Low	No	No	No	No	No	No	No	-7.55	1	0	1	1	2	0.11	1	2	2	3.79
XLGB-432	OC(=O)/C=C/c1ccc(c2c1C[C@H](O2)c1ccc(c(c1)O)O)O	C17H14O6	314.29	23	12	0.12	3	6	4	83.01	107.22	1.73	2.34	2.14	1.12	2.12	1.89	-3.45	0.111	0.000354	Soluble	-4.23	0.0185	5.87e-05	Moderately soluble	-2.7	0.631	0.00201	Soluble	High	No	Yes	No	No	No	No	No	-6.56	0	0	0	0	0	0.56	1	2	0	3.36
XLGB-433	OC(=O)/C=C/c1ccc(c2c1[C@H](C(=O)O)[C@H](O2)c1ccc(c(c1)O)O)O	C18H14O8	358.3	26	12	0.11	4	8	5	89.59	144.52	0.95	1.58	1.77	0.51	1.17	1.2	-3.13	0.263	0.000734	Soluble	-4.23	0.0213	5.95e-05	Moderately soluble	-1.81	5.51	0.0154	Soluble	Low	No	Yes	No	No	No	No	No	-7.36	0	0	1	1	0	0.56	1	2	1	3.9
XLGB-434	O=C(O[C@@H](C(=O)O)Cc1ccc(c(c1)O)O)/C=C\c1ccc(c(c1)O)O	C18H16O8	360.31	26	12	0.11	7	8	5	91.4	144.52	1.48	2.36	1.65	0.9	1.5	1.58	-3.44	0.131	0.000363	Soluble	-5.04	0.00332	9.22e-06	Moderately soluble	-2.17	2.41	0.0067	Soluble	Low	No	No	No	No	No	No	No	-6.82	0	0	1	1	0	0.56	1	2	1	3.38
XLGB-435	O=C1OC[C@@]23[C@H]1C=CC[C@]3(O)[C@@]1(C(=CC2)C(=O)O[C@H](C1)c1cocc1)C	C20H20O6	356.37	26	5	0.5	1	6	1	89.62	85.97	2.3	1.82	2.13	1.68	2.41	2.07	-3.27	0.19	0.000534	Soluble	-3.25	0.203	0.000569	Soluble	-3.58	0.0931	0.000261	Soluble	High	No	Yes	No	No	No	No	No	-7.18	0	0	0	0	0	0.55	0	2	1	5.47
XLGB-436	OC(=O)[C@@H](Cc1ccc(c(c1)O)O)O	C9H10O5	198.17	14	6	0.22	3	5	4	48	97.99	0.68	-0.2	0.09	-0.04	0.17	0.14	-1.06	17.2	0.0867	Very soluble	-1.4	7.86	0.0397	Very soluble	-0.5	62.1	0.313	Soluble	High	No	No	No	No	No	No	No	-7.65	0	0	0	0	1	0.56	1	1	1	1.91
XLGB-437	OC(=O)[C@H](OC(=O)[C@@H](Cc1ccc(c(c1)O)O)O)Cc1ccc(c(c1)O)O	C18H18O9	378.33	27	12	0.22	8	9	6	92.24	164.75	1.38	1.62	0.65	0.2	0.92	0.95	-3.01	0.372	0.000984	Soluble	-4.69	0.00769	2.03e-05	Moderately soluble	-1.95	4.25	0.0112	Soluble	Low	No	No	No	No	No	No	No	-7.46	1	0	1	1	2	0.11	1	1	2	3.4
XLGB-438	O=C(O[C@@H](C(=O)O)Cc1ccc(c(c1)O)O)/C=C/c1ccc(c(c1/C=C/c1ccc(c(c1)O)O)O)O	C26H22O10	494.45	36	18	0.08	9	10	7	130.81	184.98	2.19	3.92	3.02	1.34	2.85	2.66	-5.15	0.00349	7.06e-06	Moderately soluble	-7.5	1.55e-05	3.14e-08	Poorly soluble	-3.51	0.154	0.000312	Soluble	Low	No	No	No	No	Yes	No	No	-6.53	1	2	1	1	2	0.11	1	3	3	4.18
XLGB-439	O=C(O[C@H](C(=O)O)Cc1ccc(c(c1)O)O)/C=C/c1ccc(c2c1cc(o2)c1ccc(c(c1)O)O)O	C26H20O10	492.43	36	21	0.08	8	10	6	128.63	177.89	2.08	4.07	3.77	0.88	3.09	2.78	-5.36	0.00215	4.36e-06	Moderately soluble	-7.51	1.52e-05	3.09e-08	Poorly soluble	-4.88	0.00645	1.31e-05	Moderately soluble	Low	No	No	No	No	Yes	No	No	-6.41	1	1	1	1	2	0.11	1	2	3	4.38
XLGB-440	O=C(O[C@@H](C(=O)O)Cc1ccc(c(c1)O)O)/C=C/c1ccc(c(c1CC(=O)O)O)O	C20H18O10	418.35	30	12	0.15	9	10	6	102.94	181.82	1.15	1.83	1.28	0.55	1.41	1.25	-3.29	0.215	0.000514	Soluble	-5.27	0.00225	5.39e-06	Moderately soluble	-1.91	5.19	0.0124	Soluble	Low	No	No	No	No	No	No	No	-7.55	1	0	1	1	2	0.11	1	2	2	3.79
XLGB-441	O=C(O[C@@H](C(=O)O)Cc1ccc(c(c1)O)O)/C=C/c1ccc(c(c1/C(=C/c1ccc(c(c1)O)O)/C(=O)O[C@@H](C(=O)O)Cc1ccc(c(c1)O)O)O)O	C36H30O16	718.61	52	24	0.11	15	16	10	181.63	289.04	1.71	4.44	3.15	0.58	2.82	2.54	-6.44	0.000258	3.6e-07	Poorly soluble	-10.23	4.25e-08	5.91e-11	Insoluble	-4.09	0.0584	8.13e-05	Moderately soluble	Low	No	No	No	No	No	No	No	-7.53	3	3	2	1	4	0.11	1	4	3	5.59
XLGB-442	OC(=O)/C=C/c1ccc(c(c1/C=C/c1ccc(c(c1)O)O)O)O	C17H14O6	314.29	23	12	0	4	6	5	86.57	118.22	0.85	2.72	2.45	1.44	2.12	1.92	-3.62	0.0747	0.000238	Soluble	-4.86	0.00437	1.39e-05	Moderately soluble	-2.15	2.22	0.00706	Soluble	High	No	No	No	No	Yes	No	Yes	-6.29	0	0	0	0	0	0.56	1	3	0	2.78
XLGB-443	OC(=O)[C@@H]1Cc2ccc(c3c2C(=Cc2ccc(c(c2O3)O)O)C1=O)O	C18H12O7	340.28	25	12	0.11	1	7	4	87.2	124.29	1.52	2.69	2.17	0.75	1.7	1.77	-3.93	0.0396	0.000117	Soluble	-4.95	0.00379	1.12e-05	Moderately soluble	-3.06	0.296	0.000869	Soluble	High	No	No	Yes	No	Yes	No	No	-6.47	0	0	0	0	0	0.56	1	3	0	3.89
XLGB-444	O=C(O[C@@H](C(=O)O)Cc1ccc(c(c1)O)O)/C=C/c1ccc2c(c1)O[C@@H]([C@H](O2)c1ccc(c(c1)O)O)C(=O)O	C27H22O12	538.46	39	18	0.15	9	12	6	133.33	200.28	2.02	3.24	2.29	0.45	1.91	1.98	-4.97	0.00581	1.08e-05	Moderately soluble	-7.12	4.09e-05	7.6e-08	Poorly soluble	-3.46	0.187	0.000348	Soluble	Low	No	No	No	No	No	No	No	-7.28	3	2	1	1	3	0.11	1	2	2	4.93
XLGB-445	CC(=O)C1=C[C@@H]2C=CC3=C([C@H]2C=C1O)CCCC3(C)C	C18H22O2	270.37	20	0	0.5	1	2	1	81.91	37.3	1.74	3.78	4.27	3.09	3.13	3.2	-3.83	0.0398	0.000147	Soluble	-4.26	0.015	5.53e-05	Moderately soluble	-2.83	0.397	0.00147	Soluble	High	Yes	No	No	Yes	Yes	No	Yes	-5.27	0	0	0	0	0	0.55	0	0	1	4.69
XLGB-446	O[C@@H]1CC(C)(C)[C@@H]2[C@](C1)(C)c1cc(O)c(cc1CC2)C(C)C	C20H30O2	302.45	22	6	0.7	1	2	2	92.8	40.46	3.11	5.18	4.52	3.99	4.6	4.28	-5.11	0.00232	7.68e-06	Moderately soluble	-5.78	0.000506	1.67e-06	Moderately soluble	-4.95	0.00336	1.11e-05	Moderately soluble	High	Yes	No	No	No	No	Yes	No	-4.47	0	0	0	0	1	0.55	0	0	1	3.62
XLGB-447	CC(=C)CCCc1c(C)ccc2c1C(=O)C(=C(C2=O)C(C)C)O	C20H24O3	312.4	23	6	0.4	5	3	1	93.73	54.37	3.58	5.33	4.74	2.51	5.56	4.34	-5	0.00314	1e-05	Moderately soluble	-6.22	0.000187	5.97e-07	Poorly soluble	-5.92	0.000376	1.2e-06	Moderately soluble	High	Yes	No	No	Yes	Yes	No	Yes	-4.42	0	0	0	0	1	0.85	1	1	1	3.37
XLGB-448	OC[C@H]1O[C@@H](O[C@@H]2OC=C([C@@H]3[C@H]2[C@@](C)(O)C[C@H]3O)C(=O)OC)[C@@H]([C@H]([C@@H]1O)O)O	C17H26O11	406.38	28	0	0.82	5	11	6	88.57	175.37	2.26	-2.61	-3.04	-2.52	-2.67	-1.72	-0.39	167	0.412	Very soluble	-0.53	121	0.298	Very soluble	2.29	79400	195	Soluble	Low	No	No	No	No	No	No	No	-10.63	2	1	1	1	4	0.11	0	0	1	5.89
XLGB-449	COC(=O)C1=CO[C@H]([C@H]2[C@@H]1[C@H](O)C[C@]2(C)O)O	C11H16O6	244.24	17	0	0.73	2	6	3	56.18	96.22	1.73	-1.02	-0.86	-0.6	-0.65	-0.28	-0.58	64.3	0.263	Very soluble	-0.51	74.9	0.307	Very soluble	0.6	968	3.96	Soluble	High	No	Yes	No	No	No	No	No	-8.51	0	1	0	0	0	0.56	0	0	1	4.72
XLGB-450	O=C1C[C@H]2C(C)(C)CCC[C@@]2(c2c1cc(C(C)C)c(c2)O)C	C20H28O2	300.44	22	6	0.65	1	2	1	92.06	37.3	3.29	5.62	5.19	3.9	5.19	4.64	-5.38	0.00125	4.18e-06	Moderately soluble	-6.17	0.000205	6.82e-07	Poorly soluble	-5.65	0.000674	2.24e-06	Moderately soluble	High	Yes	No	No	Yes	Yes	No	No	-4.14	0	0	0	0	1	0.55	0	0	1	3.45
XLGB-451	OC[C@]1(O)CCCc2c1ccc1c2C(=O)C(=O)c2c1occ2C	C18H16O5	312.32	23	11	0.33	1	5	2	82.22	87.74	2.2	1.12	2.04	0.33	3.75	1.89	-2.77	0.531	0.0017	Soluble	-2.56	0.868	0.00278	Soluble	-5.18	0.00206	6.61e-06	Moderately soluble	High	No	Yes	Yes	No	No	No	No	-7.41	0	0	0	0	0	0.55	2	1	0	4.07
XLGB-452	O[C@H]1CCc2c([C@@]1(C)O)ccc1c2C(=O)C(=O)c2c1occ2C	C18H16O5	312.32	23	11	0.33	0	5	2	82.22	87.74	2.14	1.19	2.04	0.33	3.46	1.83	-2.88	0.412	0.00132	Soluble	-2.63	0.735	0.00235	Soluble	-4.93	0.00365	1.17e-05	Moderately soluble	High	No	Yes	Yes	No	No	No	No	-7.36	0	0	0	0	0	0.55	2	1	0	4.34
XLGB-453	O[C@@H]1CCc2c([C@@]1(C)O)ccc1c2C(=O)C(=O)c2c1occ2C	C18H16O5	312.32	23	11	0.33	0	5	2	82.22	87.74	2.06	1.19	2.04	0.33	3.46	1.82	-2.88	0.412	0.00132	Soluble	-2.63	0.735	0.00235	Soluble	-4.93	0.00365	1.17e-05	Moderately soluble	High	No	Yes	Yes	No	No	No	No	-7.36	0	0	0	0	0	0.55	2	1	0	4.34
XLGB-454	Cc1cccc2c1ccc1c2c(=O)oc2c1occ2C	C17H12O3	264.28	20	17	0.12	0	3	0	79.69	43.35	2.9	4.12	4.31	3.13	4.87	3.86	-4.7	0.00524	1.98e-05	Moderately soluble	-4.74	0.00484	1.83e-05	Moderately soluble	-6.95	2.94e-05	1.11e-07	Poorly soluble	High	Yes	No	Yes	Yes	No	No	No	-4.99	0	0	0	0	0	0.55	0	1	1	3.31
XLGB-455	O=C1c2c3CCCC(c3ccc2c2c(C1=O)c(C)co2)(C)C	C19H18O3	294.34	22	11	0.37	0	3	0	84.7	47.28	2.79	4.33	4.25	2.24	5.37	3.8	-4.76	0.00508	1.73e-05	Moderately soluble	-5.04	0.0027	9.18e-06	Moderately soluble	-6.71	5.77e-05	1.96e-07	Poorly soluble	High	Yes	Yes	Yes	Yes	Yes	Yes	Yes	-5.02	0	0	0	0	0	0.55	2	1	1	3.66
XLGB-456	OC[C@@]1(C)CCCc2c1ccc1c2C(=O)C(=O)c2c1occ2C	C19H18O4	310.34	23	11	0.37	1	4	1	85.86	67.51	2.41	2.93	3.22	1.39	4.75	2.94	-3.9	0.0393	0.000126	Soluble	-4.01	0.0304	9.79e-05	Moderately soluble	-6.14	0.000223	7.19e-07	Poorly soluble	High	Yes	Yes	Yes	Yes	Yes	Yes	Yes	-6.11	0	0	0	0	0	0.55	2	1	0	4.13
XLGB-457	OC[C@H](C1=C(O)c2c(C(=O)C1=O)c1cccc(c1cc2)C)C	C18H16O4	296.32	22	10	0.22	2	4	2	84.44	74.6	1.95	2.38	2.81	1.08	3.72	2.39	-3.38	0.123	0.000416	Soluble	-3.59	0.0766	0.000259	Soluble	-5	0.00297	1e-05	Moderately soluble	High	Yes	No	Yes	No	No	No	No	-6.42	0	0	0	0	0	0.85	2	1	0	3.6
XLGB-458	Cc1coc2c1C(=O)C(=O)c1c2ccc2c1cccc2C	C18H12O3	276.29	21	15	0.11	0	3	0	80.24	47.28	2.44	3.69	4.1	1.82	4.95	3.4	-4.41	0.0108	3.92e-05	Moderately soluble	-4.37	0.0117	4.23e-05	Moderately soluble	-6.91	3.44e-05	1.24e-07	Poorly soluble	High	Yes	No	Yes	Yes	No	No	Yes	-5.37	0	0	0	0	0	0.55	2	1	1	3.28
XLGB-459	C[C@@H]1CC[C@@]2(OC1)O[C@@H]1[C@H]([C@@H]2C)[C@@]2([C@@H](C1)[C@@H]1CC[C@@H]3[C@]([C@H]1CC2)(C)CC[C@@H](C3)O)C	C27H44O3	416.64	30	0	1	0	3	1	122.07	38.69	4.55	6.49	5.79	5.08	4.3	5.24	-6.51	0.000128	3.08e-07	Poorly soluble	-7.1	3.32e-05	7.97e-08	Poorly soluble	-4.51	0.0129	3.1e-05	Moderately soluble	High	Yes	No	No	No	No	No	No	-4.23	1	2	0	0	1	0.55	0	0	2	6.88
XLGB-460	OC[C@@]12CC[C@H]([C@@H]([C@H]2C2=CC[C@H]3[C@@]([C@@]2(CC1)C)(C)CC[C@H]1[C@]3(C)CC[C@@H](C1(C)C)O)C)C	C30H50O2	442.72	32	0	0.93	1	2	2	136.3	40.46	4.29	7.42	7	6	5.91	6.12	-7.19	2.84e-05	6.41e-08	Poorly soluble	-8.1	3.51e-06	7.93e-09	Poorly soluble	-6.14	0.000319	7.21e-07	Poorly soluble	Low	No	No	No	No	No	No	No	-3.73	1	3	0	1	1	0.55	0	1	2	6.28
XLGB-461	C=C1CC[C@H]2[C@@H](C1)[C@H](CC[C@]2(C)O)C(C)C	C15H26O	222.37	16	0	0.87	1	1	1	70.72	20.23	3.04	3.5	3.78	3.67	3.51	3.5	-3.36	0.0976	0.000439	Soluble	-3.61	0.0548	0.000247	Soluble	-2.98	0.232	0.00104	Soluble	High	Yes	No	No	Yes	No	No	No	-5.17	0	0	0	0	1	0.55	0	1	1	3.53
XLGB-462	O=C(c1cc(O)c(c(c1)OC(=O)c1cc(O)c(c(c1)O)O)O)O[C@@H]1[C@@H](COC(=O)c2cc(O)c(c(c2)OC(=O)c2cc(O)c(c(c2)O)O)O)O[C@H]([C@@H]([C@H]1OC(=O)c1cc(O)c(c(c1)OC(=O)c1cc(O)c(c(c1)O)O)O)OC(=O)c1cc(O)c(c(c1)OC(=O)c1cc(O)c(c(c1)O)O)O)OC(=O)c1cc(O)c(c(c1)OC(=O)c1cc(O)c(c(c1)O)O)O	C76H52O46	1701.2	122	60	0.08	31	46	25	391.51	777.98	4.29	6.2	4.84	-3.98	-0.79	2.11	-12.61	4.16e-10	2.45e-13	Insoluble	-22.32	8.1e-20	4.76e-23	Insoluble	-5.59	0.00439	2.58e-06	Moderately soluble	Low	No	Yes	No	No	No	No	No	-12.28	3	3	2	1	7	0.17	1	3	3	10
XLGB-463	Cc1cccc(c1)O	C7H8O	108.14	8	6	0.14	0	1	1	33.43	20.23	1.49	1.96	1.7	1.81	1.87	1.77	-2.3	0.542	0.00501	Soluble	-2.01	1.06	0.00977	Soluble	-2.14	0.778	0.00719	Soluble	High	Yes	No	Yes	No	No	No	No	-5.57	0	3	0	0	2	0.55	0	0	1	1
XLGB-464	Cc1ccc(cc1)O	C7H8O	108.14	8	6	0.14	0	1	1	33.43	20.23	1.48	1.94	1.7	1.81	1.87	1.76	-2.29	0.558	0.00516	Soluble	-1.99	1.11	0.0103	Very soluble	-2.14	0.778	0.00719	Soluble	High	Yes	No	Yes	No	No	No	No	-5.58	0	3	0	0	2	0.55	0	0	1	1
XLGB-465	CCCCCCCCCCCCC(=O)O	C13H26O2	214.34	15	0	0.92	11	2	1	66.38	37.3	3.21	5.57	4.38	3.42	3.94	4.1	-3.95	0.0239	0.000112	Soluble	-6.11	0.000165	7.68e-07	Poorly soluble	-4.1	0.017	7.93e-05	Moderately soluble	High	Yes	No	Yes	No	No	No	No	-3.65	0	0	1	0	1	0.85	0	0	3	1.98
XLGB-466	CCC(C(C)C)CCC(C1CCC2C1(C)CCC1C2CC=C2C1(C)CCC(C2)O)C	C29H50O	414.71	30	0	0.93	6	1	1	133.23	20.23	4.79	9.34	8.02	6.73	7.04	7.19	-7.9	5.23e-06	1.26e-08	Poorly soluble	-9.67	8.9e-08	2.15e-10	Poorly soluble	-6.19	0.000269	6.49e-07	Poorly soluble	Low	No	No	No	No	No	No	No	-2.2	1	3	0	1	2	0.55	0	1	2	6.3
XLGB-467	OCC1OC(OC2OC=C(C3C2C(C)C(C3)O)C(=O)OC)C(C(C1O)O)O	C17H26O10	390.38	27	0	0.82	5	10	5	87.37	155.14	1.52	-1.39	-2.15	-1.76	-2.19	-1.19	-1.05	34.4	0.0882	Very soluble	-1.37	16.8	0.043	Very soluble	1.92	32600	83.6	Soluble	Low	No	Yes	No	No	No	No	No	-9.67	0	1	1	1	1	0.11	0	0	1	5.77
XLGB-468	OCC1OC(OCC2OC(OC(=O)C34CCC5(C(=CCC6C5(C)CCC5C6(C)CCC(C5(C)CO)OC5OCC(C(C5O)O)O)C4CC(CC3)(C)C)C)C(C(C2O)O)O)C(C(C1O)O)O	C47H76O18	929.1	65	0	0.94	10	18	11	228.59	294.98	2.61	0.79	-0.25	-1.56	-0.51	0.22	-5.44	0.00339	3.65e-06	Moderately soluble	-6.57	0.000253	2.72e-07	Poorly soluble	-0.47	316	0.34	Soluble	Low	No	Yes	No	No	No	No	No	-11.41	3	3	1	1	5	0.17	0	2	2	9.76
XLGB-469	COC(CC1C(C=C)C(OC=C1C(=O)OC1CC2C(C1C)C(OC=C2C(=O)OC)OC1OC(CO)C(C(C1O)O)O)OC1OC(CO)C(C(C1O)O)O)OC	C35H52O20	792.78	55	0	0.77	16	20	8	178.91	288.28	3.41	-1.76	-3.12	-3.68	-3.28	-1.69	-2.59	2.04	0.00257	Soluble	-3.78	0.132	0.000166	Soluble	3.01	813000	1030	Soluble	Low	No	No	No	No	No	No	No	-12.39	3	4	2	1	5	0.11	0	3	2	8.4
XLGB-470	OCC1OC(Oc2c(OC)cc(cc2OC)C2OCC3C2COC3c2cc(OC)c(c(c2)OC)OC2OC(CO)C(C(C2O)O)O)C(C(C1O)O)O	C34H46O18	742.72	52	12	0.65	12	18	8	172.13	254.14	2.7	-1.38	-2.5	-3.74	-1.4	-1.26	-2.95	0.825	0.00111	Soluble	-3.46	0.26	0.00035	Soluble	-0.78	124	0.166	Soluble	Low	No	Yes	No	No	No	No	No	-11.81	3	4	2	1	4	0.17	0	0	2	7.21
XLGB-471	CC(C1CC=C(C(=O)C1)C)C	C10H16O	152.23	11	0	0.7	1	1	0	47.8	17.07	2.33	2.5	2.57	2.2	2.63	2.45	-2.29	0.776	0.0051	Soluble	-2.5	0.477	0.00313	Soluble	-2.15	1.08	0.0071	Soluble	High	Yes	No	No	No	No	No	No	-5.45	0	1	0	0	2	0.55	0	0	1	3.19
XLGB-472	Oc1c(cc(cc1C(C)(C)C)C(C)(C)C)C(C)(C)C	C18H30O	262.43	19	6	0.67	3	1	1	86.27	20.23	3.82	6.06	5.28	4.85	5.24	5.05	-5.32	0.00125	4.78e-06	Moderately soluble	-6.26	0.000143	5.44e-07	Poorly soluble	-5.46	0.000918	3.5e-06	Moderately soluble	High	Yes	No	No	No	No	Yes	No	-3.6	1	0	0	0	2	0.55	0	0	1	1.86
XLGB-473	Oc1ccc(c(c1C)Br)C	C8H9BrO	201.06	10	6	0.25	0	1	1	46.1	20.23	2.18	2.99	2.77	2.88	2.94	2.75	-3.41	0.0775	0.000385	Soluble	-3.08	0.168	0.000834	Soluble	-3.45	0.0707	0.000352	Soluble	High	Yes	No	Yes	No	No	No	No	-5.4	0	1	0	0	1	0.55	0	0	1	1.28
XLGB-474	CCc1cc(C)ccc1O	C9H12O	136.19	10	6	0.33	1	1	1	43.2	20.23	2.12	2.73	2.26	2.46	2.61	2.44	-2.78	0.225	0.00165	Soluble	-2.81	0.211	0.00155	Soluble	-2.97	0.146	0.00107	Soluble	High	Yes	No	Yes	No	No	No	No	-5.19	0	1	0	0	2	0.55	0	0	1	1
XLGB-475	CCC1(O)C(=O)OCc2c1cc1c3nc4ccccc4cc3Cn1c2=O	C20H16N2O4	348.35	26	16	0.25	1	5	1	95.31	81.42	2.49	1.74	1.82	1.64	3.29	2.2	-3.49	0.114	0.000327	Soluble	-3.07	0.299	0.000858	Soluble	-5.83	0.00052	1.49e-06	Moderately soluble	High	No	Yes	Yes	No	Yes	No	Yes	-7.19	0	0	0	0	0	0.55	0	0	0	3.84
XLGB-476	C=Cc1cncc2c1CCOC2=O	C10H9NO2	175.18	13	6	0.2	1	3	0	48.46	39.19	1.65	1.51	1.33	1.2	2.67	1.67	-2.15	1.23	0.00703	Soluble	-1.94	2.01	0.0115	Very soluble	-2.93	0.207	0.00118	Soluble	High	Yes	No	Yes	No	No	No	No	-6.3	0	0	0	0	1	0.55	0	0	1	2.24
XLGB-477	CC1CCC2(C(C1C)C1=CCC3C(C1(CC2)C)(C)CCC1C3(C)CCC(C1(C)C)O)C(=O)O	C30H48O3	456.7	33	0	0.9	1	3	2	136.91	57.53	4.01	7.34	7.09	5.82	5.46	5.94	-7.23	2.69e-05	5.89e-08	Poorly soluble	-8.38	1.92e-06	4.21e-09	Poorly soluble	-5.67	0.000972	2.13e-06	Moderately soluble	Low	No	No	No	No	No	No	No	-3.87	1	3	0	1	1	0.85	0	1	2	6.21
XLGB-478	CCC(C(C)C)CCC(C1CCC2C1(C)CCC1C2CC=C2C1(C)CCC(C2)OC1OC(CO)C(C(C1O)O)O)C	C35H60O6	576.85	41	0	0.94	9	6	4	165.61	99.38	4.98	7.74	5.85	3.96	5.02	5.51	-7.7	1.15e-05	2e-08	Poorly soluble	-9.67	1.23e-07	2.14e-10	Poorly soluble	-4.4	0.0228	3.94e-05	Moderately soluble	Low	No	No	No	No	No	No	No	-4.32	1	4	0	0	1	0.55	0	1	3	8.02
XLGB-479	OCC1OC(C(C1O)O)(CO)OC1OC(CO)C(C(C1O)O)O	C12H22O11	342.3	23	0	1	5	11	8	68.16	189.53	1.04	-3.7	-5.4	-4.37	-3.86	-3.26	0.7	1710	5	Highly soluble	0.31	696	2.03	Highly soluble	3.67	1620000	4730	Soluble	Low	No	Yes	No	No	No	No	No	-11.02	2	1	1	1	4	0.17	0	0	0	5.16
XLGB-480	CCCCC(=O)O	C5H10O2	102.13	7	0	0.8	3	2	1	27.92	37.3	1.32	1.39	1.26	0.89	0.52	1.08	-1.15	7.22	0.0706	Very soluble	-1.78	1.71	0.0167	Very soluble	-0.78	16.9	0.166	Soluble	High	Yes	No	No	No	No	No	No	-5.94	0	3	0	0	1	0.85	0	0	1	1
XLGB-481	OCC1(C)C(O)CCC2(C1CCC1(C2CC=C2C1(C)CCC1(C2CC(CC1)(C)C)C(=O)O)C)C	C30H48O4	472.7	34	0	0.9	2	4	3	137.82	77.76	3.55	6.82	6.21	4.97	5.24	5.36	-6.94	5.49e-05	1.16e-07	Poorly soluble	-8.26	2.59e-06	5.48e-09	Poorly soluble	-5.55	0.00134	2.83e-06	Moderately soluble	High	No	Yes	No	No	No	No	No	-4.34	1	3	0	1	1	0.56	0	1	2	6.24
XLGB-482	CC[C@@H](C(C)C)CC[C@H]([C@H]1CC[C@@H]2[C@]1(C)CC[C@H]1[C@H]2CC=C2[C@]1(C)CC[C@@H](C2)O)C	C29H50O	414.71	30	0	0.93	6	1	1	133.23	20.23	5.05	9.34	8.02	6.73	7.04	7.24	-7.9	5.23e-06	1.26e-08	Poorly soluble	-9.67	8.9e-08	2.15e-10	Poorly soluble	-6.19	0.000269	6.49e-07	Poorly soluble	Low	No	No	No	No	No	No	No	-2.2	1	3	0	1	2	0.55	0	1	2	6.3
XLGB-483	OC[C@]1(C)[C@@H](O)CC[C@]2([C@H]1CC[C@@]1([C@@H]2CC=C2[C@@]1(C)CC[C@@]1([C@H]2CC(CC1)(C)C)C(=O)O)C)C	C30H48O4	472.7	34	0	0.9	2	4	3	137.82	77.76	3.4	6.82	6.21	4.97	5.24	5.33	-6.94	5.49e-05	1.16e-07	Poorly soluble	-8.26	2.59e-06	5.48e-09	Poorly soluble	-5.55	0.00134	2.83e-06	Moderately soluble	High	No	Yes	No	No	No	No	No	-4.34	1	3	0	1	1	0.56	0	1	2	6.24
XLGB-484	C=C[C@H]1[C@@H](OC=C2[C@H]1CCOC2=O)O[C@@H]1O[C@H](CO)[C@H]([C@@H]([C@H]1O)O)O	C16H22O9	358.34	25	0	0.69	4	9	4	80.92	134.91	1.62	-0.92	-1.59	-1.33	-1.2	-0.68	-1.22	21.7	0.0605	Very soluble	-1.43	13.3	0.0372	Very soluble	1.25	6370	17.8	Soluble	Low	No	Yes	No	No	No	No	No	-9.14	0	1	0	1	0	0.56	0	1	1	5.5
XLGB-485	O[C@@H]1OC=C2[C@H]([C@H]1C=C)CCOC2=O	C10H12O4	196.2	14	0	0.5	1	4	1	48.54	55.76	1.64	0.67	0.58	0.66	0.94	0.9	-1.41	7.59	0.0387	Very soluble	-1.42	7.5	0.0382	Very soluble	-0.4	77.6	0.395	Soluble	High	No	No	No	No	No	No	No	-7.02	0	0	0	0	1	0.85	0	1	1	4.09
XLGB-486	O[C@@H]1Cc2c([C@H]1C)cncc2	C9H11NO	149.19	11	6	0.44	0	2	1	42.83	33.12	1.53	0.86	1.1	0.87	1.71	1.22	-1.71	2.91	0.0195	Very soluble	-1.14	10.8	0.0726	Very soluble	-2.19	0.972	0.00652	Soluble	High	Yes	No	No	No	No	No	No	-6.6	0	1	0	0	1	0.55	0	0	1	2.57
XLGB-487	CCCCCCCCCCCCCCCCCCCCCCCCC(=O)O	C25H50O2	382.66	27	0	0.96	23	2	1	124.06	37.3	5.68	12	9.06	6.21	9.21	8.43	-8.25	2.13e-06	5.57e-09	Poorly soluble	-12.79	6.25e-11	1.63e-13	Insoluble	-8.89	4.96e-07	1.3e-09	Poorly soluble	Low	No	No	Yes	No	No	No	No	-0.11	1	2	1	1	2	0.85	0	0	3	3.36
XLGB-488	CCCCCCCCCCCCCCCCCCCCCCCCCCCCCCCC(=O)O	C32H64O2	480.85	34	0	0.97	30	2	1	157.71	37.3	7.37	15.79	11.79	7.58	12.3	10.97	-10.79	7.82e-09	1.63e-11	Insoluble	-16.72	9.17e-15	1.91e-17	Insoluble	-11.63	1.14e-09	2.36e-12	Insoluble	Low	No	Yes	No	No	No	No	No	1.98	1	4	1	1	2	0.85	0	0	3	4.24
XLGB-489	OC[C@H]1O[C@@H](O[C@@H]2OC=C([C@@H]3[C@H]2[C@@H](C)[C@H](C3)O)C(=O)OC)[C@@H]([C@H]([C@@H]1O)O)O	C17H26O10	390.38	27	0	0.82	5	10	5	87.37	155.14	2.19	-1.39	-2.15	-1.76	-2.19	-1.06	-1.05	34.4	0.0882	Very soluble	-1.37	16.8	0.043	Very soluble	1.92	32600	83.6	Soluble	Low	No	Yes	No	No	No	No	No	-9.67	0	1	1	1	1	0.11	0	0	1	5.77
XLGB-490	COC(=O)C1=CO[C@H]([C@H]2[C@@H]1C[C@@H]([C@@H]2C)O)O	C11H16O5	228.24	16	0	0.73	2	5	2	54.98	75.99	2.02	0.21	0.02	0.22	-0.16	0.46	-1.26	12.7	0.0555	Very soluble	-1.36	9.85	0.0432	Very soluble	0.24	398	1.74	Soluble	High	No	No	No	No	No	No	No	-7.54	0	0	0	0	0	0.56	0	0	1	4.54
XLGB-491	OC[C@]1(C)[C@H](CC[C@]2([C@H]1CC[C@@]1([C@@H]2CC=C2[C@@]1(C)CC[C@@]1([C@H]2CC(CC1)(C)C)C(=O)O)C)C)O[C@@H]1OC[C@@H]([C@@H]([C@H]1O[C@@H]1O[C@@H](C)[C@@H]([C@H]([C@H]1O)O)O)O)O	C41H66O12	750.96	53	0	0.93	6	12	7	195.45	195.6	4.17	3.64	3.52	1.46	2.17	2.99	-6.39	0.000304	4.04e-07	Poorly soluble	-7.44	2.75e-05	3.66e-08	Poorly soluble	-2.93	0.89	0.00119	Soluble	Low	No	Yes	No	No	No	No	No	-8.3	3	3	1	1	4	0.11	0	2	2	8.75
XLGB-492	OC[C@]1(C)[C@@H](O)CC[C@]2([C@H]1CC[C@@]1([C@H]2CC=C2[C@@]1(C)CC[C@@]1([C@@H]2CC(CC1)(C)C)C(=O)O)C)C	C30H48O4	472.7	34	0	0.9	2	4	3	137.82	77.76	3.76	6.82	6.21	4.97	5.24	5.4	-6.94	5.49e-05	1.16e-07	Poorly soluble	-8.26	2.59e-06	5.48e-09	Poorly soluble	-5.55	0.00134	2.83e-06	Moderately soluble	High	No	Yes	No	No	No	No	No	-4.34	1	3	0	1	1	0.56	0	1	2	6.24
XLGB-493	OC[C@H]1O[C@@H](OC[C@H]2O[C@@H](OC(=O)[C@@]34CCC(C[C@@H]4C4=CC[C@@H]5[C@@]([C@@]4(CC3)C)(C)CC[C@@H]3[C@]5(C)CC[C@@H]([C@@]3(C)CO)O[C@@H]3OC[C@@H]([C@@H]([C@H]3O[C@@H]3O[C@@H](C)[C@@H]([C@H]([C@H]3O)O[C@@H]3O[C@H](CO)[C@H]([C@@H]([C@H]3O)O)O)O)O)O)(C)C)[C@@H]([C@H]([C@@H]2O)O)O)[C@@H]([C@H]([C@@H]1O)O)O	C59H96O27	1237.38	86	0	0.95	15	27	16	292.19	433.05	5.04	-1.9	-3.57	-5.28	-4.08	-1.96	-5.32	0.00586	4.73e-06	Moderately soluble	-6.67	0.000262	2.12e-07	Poorly soluble	2.76	707000	571	Soluble	Low	No	Yes	No	No	No	No	No	-15.2	3	4	2	1	5	0.17	0	2	2	10
XLGB-494	OC[C@H]1O[C@@H](OC[C@H]2O[C@@H](OC(=O)[C@]34CC[C@@]5(C(=CC[C@H]6[C@@]5(C)CC[C@H]5[C@@]6(C)CC[C@H]([C@@]5(C)CO)O[C@@H]5OC[C@@H]([C@@H]([C@H]5O)O)O)[C@H]4CC(CC3)(C)C)C)[C@@H]([C@H]([C@@H]2O)O)O)[C@@H]([C@H]([C@@H]1O)O)O	C47H76O18	929.1	65	0	0.94	10	18	11	228.59	294.98	4.7	0.79	-0.25	-1.56	-0.51	0.63	-5.44	0.00339	3.65e-06	Moderately soluble	-6.57	0.000253	2.72e-07	Poorly soluble	-0.47	316	0.34	Soluble	Low	No	Yes	No	No	No	No	No	-11.41	3	3	1	1	5	0.17	0	2	2	9.76
XLGB-495	OC[C@]1(C)[C@H](O)CC[C@@]2([C@@H]1CC[C@@]1([C@@H]2CC=C2[C@@]1(C)CC[C@@]1([C@@H]2CC(CC1)(C)C)C(=O)O)C)C	C30H48O4	472.7	34	0	0.9	2	4	3	137.82	77.76	3.75	6.82	6.21	4.97	5.24	5.4	-6.94	5.49e-05	1.16e-07	Poorly soluble	-8.26	2.59e-06	5.48e-09	Poorly soluble	-5.55	0.00134	2.83e-06	Moderately soluble	High	No	Yes	No	No	No	No	No	-4.34	1	3	0	1	1	0.56	0	1	2	6.24
XLGB-496	COc1cc(O)c2c(c1)oc1c(c2=O)cc(cc1)O	C14H10O5	258.23	19	14	0.07	1	5	2	70.53	79.9	2.27	2.77	2.37	0.57	2.48	2.09	-3.67	0.0558	0.000216	Soluble	-4.1	0.0203	7.88e-05	Moderately soluble	-4.27	0.0139	5.38e-05	Moderately soluble	High	No	No	Yes	No	No	Yes	Yes	-5.91	0	0	0	0	0	0.55	0	1	0	2.89
XLGB-497	O=C(O[C@@H]1[C@@H](O)C[C@@](C[C@@H]1OC(=O)/C=C/c1ccc(c(c1)O)O)(O)C(=O)O)/C=C/c1ccc(c(c1)O)O	C25H24O12	516.45	37	12	0.24	9	12	7	126.9	211.28	2.03	1.52	0.81	-0.35	0.69	0.94	-3.65	0.117	0.000226	Soluble	-5.57	0.0014	2.72e-06	Moderately soluble	-1.16	35.4	0.0685	Soluble	Low	No	Yes	No	No	No	No	No	-8.37	3	1	1	1	3	0.11	1	3	2	4.86
XLGB-498	COc1c(c2ccccc2)n(C)c2c(c1=O)cc(cc2)OC	C18H17NO3	295.33	22	16	0.17	3	3	0	87.89	40.46	3.1	3.48	3.22	1.81	3.64	3.05	-4.2	0.0185	6.26e-05	Moderately soluble	-4.01	0.0287	9.73e-05	Moderately soluble	-5.93	0.000345	1.17e-06	Moderately soluble	High	Yes	No	Yes	Yes	Yes	Yes	Yes	-5.63	0	0	0	0	0	0.55	0	0	0	2.61
XLGB-499	O=C(O[C@H]1C[C@@](O)(C[C@@H]([C@@H]1O)OC(=O)/C=C/c1ccc(c(c1)O)O)C(=O)O)/C=C\c1ccc(c(c1)O)O	C25H24O12	516.45	37	12	0.24	9	12	7	126.9	211.28	1.31	1.52	0.81	-0.35	0.69	0.8	-3.65	0.117	0.000226	Soluble	-5.57	0.0014	2.72e-06	Moderately soluble	-1.16	35.4	0.0685	Soluble	Low	No	Yes	No	No	No	No	No	-8.37	3	1	1	1	3	0.11	1	3	2	4.81
XLGB-500	Cc1cc(C)c(c(c1)C)O	C9H12O	136.19	10	6	0.33	0	1	1	43.36	20.23	2.12	2.73	2.32	2.46	2.75	2.47	-2.85	0.193	0.00142	Soluble	-2.81	0.211	0.00155	Soluble	-2.95	0.152	0.00111	Soluble	High	Yes	No	Yes	No	No	No	No	-5.19	0	1	0	0	2	0.55	0	0	1	1
XLGB-501	COC(=O)c1cncc2c1C[C@@H]([C@@H]2C)O	C11H13NO3	207.23	15	6	0.45	2	4	1	54.11	59.42	2	0.71	0.89	0.72	1.55	1.17	-1.74	3.8	0.0184	Very soluble	-1.54	6.03	0.0291	Very soluble	-2.29	1.07	0.00514	Soluble	High	Yes	No	No	No	No	No	No	-7.06	0	0	0	0	0	0.55	0	0	1	3.06
XLGB-502	ClC[C@@H](O[C@H](CCl)Cl)Cl	C4H6Cl4O	211.9	9	0	1	4	1	0	41.61	9.23	2.13	2.77	2.61	2.22	2.9	2.52	-2.63	0.491	0.00232	Soluble	-2.62	0.509	0.0024	Soluble	-3	0.213	0.001	Soluble	High	Yes	No	No	No	No	No	No	-5.63	0	1	0	0	2	0.55	0	1	1	3.22
XLGB-503	OC[C@]1(C)[C@H](CC[C@@H]2[C@@H]1CC[C@@]1([C@@H]2CC=C2[C@@H]1CC[C@]1([C@@H]2CC(CC1)(C)C)C(=O)O)C)O[C@@H]1OC[C@@H]([C@@H]([C@H]1O)O)O	C33H52O8	576.76	41	0	0.91	4	8	5	155.14	136.68	3.76	3.8	3.89	2.71	2.6	3.35	-5.55	0.00164	2.84e-06	Moderately soluble	-6.36	0.000249	4.32e-07	Poorly soluble	-3.01	0.565	0.000979	Soluble	Low	No	Yes	No	No	No	No	No	-7.12	1	3	0	1	0	0.56	0	2	2	7.4
XLGB-504	OC[C@]1(C)[C@@H](O)CC[C@@H]2[C@@H]1CC[C@@]1([C@@H]2CC=C2[C@@H]1CC[C@]1([C@@H]2CC(CC1)(C)C)C(=O)O)C	C28H44O4	444.65	32	0	0.89	2	4	3	128.72	77.76	3.41	5.88	5.43	4.58	4.21	4.7	-6.17	0.000301	6.77e-07	Poorly soluble	-7.29	2.3e-05	5.18e-08	Poorly soluble	-4.36	0.0192	4.33e-05	Moderately soluble	High	No	Yes	No	No	Yes	No	No	-4.84	1	1	0	0	1	0.56	0	1	2	6
XLGB-505	OC[C@]1(C)[C@H](CC[C@]2([C@@H]1CC[C@@]1([C@@H]2CC=C2[C@@]1(C)CC[C@@]1([C@@H]2CC(CC1)(C)C)C(=O)O)C)C)O[C@@H]1OC[C@@H]([C@@H]([C@H]1O[C@@H]1O[C@@H](C)[C@@H]([C@H]([C@H]1O)O)O)O)O	C41H66O12	750.96	53	0	0.93	6	12	7	195.45	195.6	3.86	3.64	3.52	1.46	2.17	2.93	-6.39	0.000304	4.04e-07	Poorly soluble	-7.44	2.75e-05	3.66e-08	Poorly soluble	-2.93	0.89	0.00119	Soluble	Low	No	Yes	No	No	No	No	No	-8.3	3	3	1	1	4	0.11	0	2	2	8.75
XLGB-506	OC[C@H]1O[C@H](O[C@H]2[C@H](CO[C@H]([C@@H]2O[C@@H]2O[C@@H](C)[C@@H]([C@H]([C@H]2O[C@@H]2O[C@@H](C)[C@@H]([C@H]([C@H]2O)O)O)O)O)O[C@H]2CC[C@]3([C@H]([C@]2(C)CO)CC[C@@]2([C@@H]3CC=C3[C@@]2(C)CC[C@@]2([C@@H]3CC(C)(C)CC2)C(=O)O)C)C)O[C@@H]2O[C@H](CO)[C@H]([C@@H]([C@H]2O)O)O)[C@@H]([C@H]([C@@H]1O)O)O	C59H96O26	1221.38	85	0	0.95	14	26	15	291.44	412.82	4.67	-0.64	-1.98	-4.58	-3.48	-1.2	-6.09	0.001	8.22e-07	Poorly soluble	-7.56	3.39e-05	2.78e-08	Poorly soluble	2.17	180000	147	Soluble	Low	No	Yes	No	No	No	No	No	-14.2	3	4	2	1	5	0.11	0	2	2	10
XLGB-507	OC[C@H]1O[C@@H](O[C@H]2[C@@H](O)[C@H](O[C@H]3[C@@H](OC[C@@H]([C@@H]3O)O)O[C@H]3CC[C@]4([C@@H]([C@]3(C)CO)CC[C@@]3([C@@H]4CC=C4[C@@]3(C)CC[C@@]3([C@@H]4CC(C)(C)CC3)C(=O)O[C@@H]3O[C@H](CO[C@@H]4O[C@H](CO)[C@H]([C@@H]([C@H]4O)O)O)[C@H]([C@@H]([C@H]3O)O)O)C)C)O[C@H]([C@@H]2O)C)[C@@H]([C@H]([C@@H]1O[C@@H]1O[C@H](CO)[C@H]([C@@H]([C@H]1O)O)O)O)O	C65H106O32	1399.52	97	0	0.95	18	32	19	324.58	512.2	3.58	-4.05	-5.75	-7.45	-6.16	-3.96	-4.78	0.0234	1.67e-05	Moderately soluble	-6.1	0.0011	7.86e-07	Poorly soluble	4.69	68200000	48800	Soluble	Low	No	Yes	No	No	No	No	No	-17.71	3	4	2	1	7	0.17	0	2	2	10
XLGB-508	O=CC[C@H]1[C@@H](CC)[C@H](CC=C1C(=O)O[C@H]1C[C@@H]2[C@]([C@H]1C)(C)[C@@H](OC=C2)O[C@@H]1O[C@H](CO)[C@H]([C@H]([C@H]1O)O)O)O[C@@H]1O[C@H](CO)[C@H](C[C@H]1O)O	C33H50O15	686.74	48	0	0.82	12	15	7	164.01	231.13	3.09	-0.01	-0.98	-1.96	-1.34	-0.24	-3.3	0.345	0.000502	Soluble	-4.39	0.0277	4.03e-05	Moderately soluble	1.2	10900	15.9	Soluble	Low	No	No	No	No	No	No	No	-10.5	3	4	2	1	4	0.17	0	1	2	8
XLGB-509	O=CC[C@H]1[C@@H](CC)[C@@H](O)CC=C1C(=O)O[C@@H]1C[C@@H]2[C@]([C@H]1C)(C)[C@H](O)OC=C2	C21H30O6	378.46	27	0	0.71	6	6	2	100.4	93.06	2.65	2.2	2.35	1.7	1.85	2.15	-3.18	0.252	0.000666	Soluble	-3.79	0.0616	0.000163	Soluble	-1.56	10.4	0.0274	Soluble	High	No	Yes	No	No	No	No	Yes	-7.05	0	0	0	0	0	0.55	0	1	1	5.81
XLGB-510	COc1cc(O)c(c(c1)O)C(=O)c1ccc(cc1)O	C14H12O5	260.24	19	12	0.07	3	5	3	68.88	86.99	1.69	2.72	2.04	0.84	1.95	1.85	-3.44	0.0953	0.000366	Soluble	-4.2	0.0164	6.3e-05	Moderately soluble	-3.27	0.14	0.000538	Soluble	High	No	No	Yes	No	Yes	No	Yes	-5.96	0	0	0	0	0	0.55	0	0	0	1.87
XLGB-511	OC[C@H]1O[C@@H](OC2CC3CCC4C([C@]3(CC2O)C)CC[C@]2(C4C[C@H]3[C@@H]2[C@@H]([C@]2(O3)CCC(CO2)C)C)C)[C@H]([C@H]([C@H]1O)O)O[C@@H]1O[C@H](CO)[C@H]([C@@H]([C@H]1O)O)O	C39H64O14	756.92	53	0	1	6	14	8	188	217.22	4.23	2.33	0.41	-0.52	-0.85	1.12	-5.6	0.00188	2.48e-06	Moderately soluble	-6.53	0.000223	2.95e-07	Poorly soluble	-0.06	662	0.875	Soluble	Low	No	Yes	No	No	No	No	No	-9.26	3	3	1	1	5	0.17	0	1	1	9.32
XLGB-512	OC[C@H]1O[C@@H](OC2CC[C@]3(C(C2)CCC2C3CC[C@]3(C2C[C@H]2[C@@H]3[C@H](C)[C@]3(O2)CC[C@H](CO3)C)C)C)[C@H]([C@H]([C@@H]1O)O)O[C@@H]1O[C@H](CO)[C@H]([C@@H]([C@H]1O)O)O	C39H64O13	740.92	52	0	1	6	13	7	186.84	196.99	4.58	3.3	1.44	0.22	0.04	1.91	-6.12	0.000566	7.64e-07	Poorly soluble	-7.11	5.72e-05	7.72e-08	Poorly soluble	-0.89	95.9	0.129	Soluble	Low	No	Yes	No	No	No	No	No	-8.48	3	3	1	1	5	0.17	0	1	1	9.24
XLGB-513	OCC([C@H](C(=O)NCCC(=O)O)O)(C)C	C9H17NO5	219.23	15	0	0.78	7	5	4	52.21	106.86	0.95	-1.08	-1.04	-0.8	-0.44	-0.48	-0.06	192	0.877	Very soluble	-0.67	46.4	0.212	Very soluble	-0.2	139	0.634	Soluble	High	No	No	No	No	No	No	No	-8.4	0	1	0	0	0	0.56	0	0	1	2.44
XLGB-514	OC[C@H]1O[C@@H](OC2CC[C@]3([C@@H](C2)CCC2C3CC[C@]3(C2C[C@H]2[C@@H]3[C@H](C)[C@]3(O2)CCC(CO3)C)C)C)[C@@H]([C@H]([C@H]1O)O)O	C33H54O8	578.78	41	0	1	3	8	4	154.45	117.84	4.48	4.9	3.62	2.56	2.15	3.54	-6.32	0.000279	4.81e-07	Poorly soluble	-7.11	4.49e-05	7.75e-08	Poorly soluble	-2.72	1.1	0.00189	Soluble	High	No	Yes	No	No	No	No	No	-6.35	1	3	0	0	0	0.55	0	1	2	8.14
XLGB-515	OC[C@H]1O[C@@H](OC2CC[C@]3([C@@H](C2)CCC2C3CC[C@]3(C2C[C@H]2[C@@H]3[C@H](C)[C@]3(O2)CC[C@@H](CO3)C)C)C)[C@@H]([C@H]([C@H]1O)O)O[C@@H]1O[C@H](CO)[C@H]([C@@H]([C@H]1O)O)O	C39H64O13	740.92	52	0	1	6	13	7	186.84	196.99	3.67	3.3	1.44	0.22	0.04	1.73	-6.12	0.000566	7.64e-07	Poorly soluble	-7.11	5.72e-05	7.72e-08	Poorly soluble	-0.89	95.9	0.129	Soluble	Low	No	Yes	No	No	No	No	No	-8.48	3	3	1	1	5	0.17	0	1	1	9.24
XLGB-516	NC(=O)c1cccnc1	C6H6N2O	122.12	9	6	0	1	2	1	32.33	55.98	0.7	-0.37	0.18	-0.43	0.52	0.12	-0.79	19.7	0.162	Very soluble	-0.34	55.5	0.454	Very soluble	-1.57	3.3	0.027	Soluble	High	No	No	No	No	No	No	No	-7.31	0	3	0	0	1	0.55	0	0	1	1
XLGB-517	OC(=O)c1cccnc1	C6H5NO2	123.11	9	6	0	1	3	1	31.2	50.19	0.86	0.36	0.78	-1.13	0.75	0.32	-1.26	6.81	0.0553	Very soluble	-0.98	12.9	0.105	Very soluble	-1.35	5.46	0.0444	Soluble	High	Yes	No	No	No	No	No	No	-6.8	0	3	0	0	1	0.85	0	0	1	1
XLGB-518	OC[C@H]1O[C@@H](OC2CC[C@]3(C(C2)CCC2C3CC[C@]3(C2C[C@H]2[C@@H]3C(=C(O2)CC[C@@H](CO[C@@H]2O[C@H](CO)[C@H]([C@@H]([C@H]2O)O)O)C)C)C)C)[C@@H]([C@H]([C@H]1O)O)O[C@@H]1O[C@H](CO)[C@H]([C@@H]([C@H]1O)O)O	C45H74O18	903.06	63	0	0.96	13	18	11	220.9	287.14	4.68	0.93	-0.83	-2.59	-1.27	0.18	-5.17	0.00615	6.81e-06	Moderately soluble	-6.55	0.000257	2.84e-07	Poorly soluble	0.7	4530	5.01	Soluble	Low	No	Yes	No	No	No	No	No	-11.15	3	4	2	1	5	0.17	0	1	2	10
XLGB-519	CCCCCCCCCCCCCCCCCCCCCCCC(=O)O	C24H48O2	368.64	26	0	0.96	22	2	1	119.25	37.3	5.62	11.46	8.67	6	8.77	8.1	-7.89	4.71e-06	1.28e-08	Poorly soluble	-12.23	2.19e-10	5.94e-13	Insoluble	-8.49	1.18e-06	3.21e-09	Poorly soluble	Low	No	No	Yes	No	No	No	No	-0.41	1	2	1	1	2	0.85	0	0	3	3.24
XLGB-520	OC[C@H]1O[C@@H](Oc2c(oc3c(c2=O)c(O)cc(c3)O)c2ccc(cc2)O)[C@@H]([C@H]([C@@H]1O)O)O	C21H20O11	448.38	32	16	0.29	4	11	7	108.13	190.28	1.29	0.72	-0.24	-2.1	-0.12	-0.09	-3.18	0.297	0.000661	Soluble	-4.29	0.0228	5.08e-05	Moderately soluble	-2.1	3.55	0.00791	Soluble	Low	No	No	No	No	No	No	No	-8.52	2	0	1	1	3	0.17	0	0	1	5.29
XLGB-521	Oc1ccc2c(c1)oc1c2c(=O)oc2c1cc1c(c2)OC(C(C1O)O)(C)C	C20H16O7	368.34	27	17	0.25	0	7	3	97.91	113.27	2.41	2.01	2.64	1.33	2.85	2.25	-3.86	0.0513	0.000139	Soluble	-4.02	0.0355	9.65e-05	Moderately soluble	-5.27	0.00197	5.35e-06	Moderately soluble	High	No	No	No	No	No	No	No	-7.12	0	0	0	0	0	0.55	0	1	1	4.15
XLGB-522	COc1c2oc(=O)ccc2cc2c1occ2	C12H8O4	216.19	16	13	0.08	1	4	0	58.75	52.58	2.22	2	2.55	1.18	2.88	2.16	-2.98	0.229	0.00106	Soluble	-2.73	0.402	0.00186	Soluble	-4.63	0.00501	2.32e-05	Moderately soluble	High	Yes	No	Yes	No	No	No	No	-6.2	0	0	0	0	0	0.55	0	1	1	2.97
XLGB-523	[O]c1ccc(cc1)C(=O)O	C7H5O3	137.11	10	6	0	1	3	1	33.53	37.3	-5.62	1.58	1.53	0.99	0.74	-0.16	-2.06	1.18	0.00864	Soluble	-1.97	1.46	0.0106	Very soluble	-1.17	9.33	0.0681	Soluble	High	Yes	Yes	No	No	No	No	No	-6.01	0	3	0	0	1	0.85	0	0	1	1
XLGB-524	CC(=CCc1c(O)ccc2c1OC(CC2=O)c1ccc(cc1)O)C	C20H20O4	324.37	24	12	0.25	3	4	2	93.27	66.76	2.93	4.12	3.99	2.38	4.22	3.53	-4.62	0.0078	2.41e-05	Moderately soluble	-5.23	0.00192	5.91e-06	Moderately soluble	-5.24	0.00187	5.77e-06	Moderately soluble	High	Yes	No	Yes	Yes	Yes	Yes	Yes	-5.35	0	0	0	0	0	0.55	0	1	1	3.61
XLGB-525	CCOC(=O)CCc1ccc2c(c1O)cco2	C13H14O4	234.25	17	9	0.31	5	4	1	63.72	59.67	2.34	2.42	2.63	1.37	2.82	2.32	-2.88	0.31	0.00132	Soluble	-3.32	0.113	0.000484	Soluble	-4.01	0.0229	9.77e-05	Moderately soluble	High	Yes	No	Yes	No	No	No	No	-6.01	0	0	0	0	0	0.55	0	0	1	2.43
XLGB-526	Oc1ccc2c(c1)oc1c2c(=O)oc2c1cc1CCC(Oc1c2)(C)C	C20H16O5	336.34	25	17	0.25	0	5	1	95.59	72.81	3.1	4.1	4.5	2.95	4.66	3.86	-5.01	0.00328	9.74e-06	Moderately soluble	-5.33	0.00156	4.63e-06	Moderately soluble	-6.9	4.2e-05	1.25e-07	Poorly soluble	High	Yes	Yes	Yes	Yes	Yes	No	No	-5.44	0	0	0	0	0	0.55	0	1	1	3.29
XLGB-527	COc1cc(O)c(cc1C(=O)C=Cc1ccc(cc1)O)C=O	C17H14O5	298.29	22	12	0.06	5	5	2	82.17	83.83	1.65	2.96	2.71	1.17	3.22	2.34	-3.63	0.0703	0.000236	Soluble	-4.38	0.0123	4.14e-05	Moderately soluble	-3.87	0.0402	0.000135	Soluble	High	No	No	Yes	No	Yes	No	Yes	-6.02	0	0	0	0	0	0.55	0	2	0	2.73
XLGB-528	CC(=CCc1cc2C(=O)CC(Oc2cc1O)c1ccc(cc1)O)C	C20H20O4	324.37	24	12	0.25	3	4	2	93.27	66.76	2.93	4.12	3.99	2.38	4.22	3.53	-4.62	0.0078	2.41e-05	Moderately soluble	-5.23	0.00192	5.91e-06	Moderately soluble	-5.24	0.00187	5.77e-06	Moderately soluble	High	Yes	No	Yes	Yes	Yes	Yes	Yes	-5.35	0	0	0	0	0	0.55	0	1	1	3.58
XLGB-529	COc1cc2O[C@H](CC(=O)c2cc1CC=C(C)C)c1ccc(cc1)O	C21H22O4	338.4	25	12	0.29	4	4	1	97.74	55.76	3.31	4.45	4.29	2.61	4.76	3.88	-4.83	0.00497	1.47e-05	Moderately soluble	-5.34	0.00155	4.57e-06	Moderately soluble	-5.93	0.000395	1.17e-06	Moderately soluble	High	Yes	No	No	Yes	Yes	Yes	Yes	-5.2	0	0	0	0	0	0.55	0	1	1	3.7
XLGB-530	Oc1ccc2c(c1)occ(c2=O)c1ccc2c(c1)C=CC(O2)(C)C	C20H16O4	320.34	24	16	0.15	1	4	1	94.06	59.67	3.07	3.75	4.24	2.2	4.4	3.53	-4.62	0.00776	2.42e-05	Moderately soluble	-4.7	0.00646	2.02e-05	Moderately soluble	-6.4	0.000128	4e-07	Poorly soluble	High	Yes	No	Yes	Yes	Yes	No	Yes	-5.59	0	0	0	0	0	0.55	0	0	1	3.64
XLGB-531	Oc1ccc2c(c1)occ(c2=O)c1ccc2c(c1)CC(C(O2)(C)C)O	C20H18O5	338.35	25	16	0.25	1	5	2	94.91	79.9	2.94	2.83	3.24	1.44	3.9	2.87	-4.13	0.0252	7.44e-05	Moderately soluble	-4.17	0.0231	6.83e-05	Moderately soluble	-6.05	0.000302	8.91e-07	Poorly soluble	High	No	Yes	Yes	No	Yes	Yes	Yes	-6.35	0	0	0	0	0	0.55	0	0	0	3.79
XLGB-532	O=Cc1cc(ccc1O)c1coc2c(c1=O)ccc(c2)O	C16H10O5	282.25	21	16	0	2	5	2	77.35	87.74	1.61	2.48	2.68	0.43	3.19	2.08	-3.58	0.0735	0.000261	Soluble	-3.97	0.0304	0.000108	Soluble	-4.92	0.00336	1.19e-05	Moderately soluble	High	No	No	Yes	No	No	Yes	Yes	-6.26	0	0	0	0	0	0.55	0	1	0	2.93
XLGB-533	O=c1ccc2c(o1)c1ccoc1cc2	C11H6O3	186.16	14	13	0	0	3	0	52.26	43.35	2.03	2.08	2.54	1.48	2.91	2.21	-2.99	0.19	0.00102	Soluble	-2.62	0.447	0.0024	Soluble	-4.5	0.00587	3.16e-05	Moderately soluble	High	Yes	No	Yes	No	No	No	No	-5.96	0	0	0	0	1	0.55	0	1	1	3.07
XLGB-534	CCOC(=O)CCc1cc2ccoc2cc1O	C13H14O4	234.25	17	9	0.31	5	4	1	63.72	59.67	2.14	2.42	2.63	1.37	2.82	2.28	-2.88	0.31	0.00132	Soluble	-3.32	0.113	0.000484	Soluble	-4.01	0.0229	9.77e-05	Moderately soluble	High	Yes	No	Yes	No	No	No	No	-6.01	0	0	0	0	0	0.55	0	0	1	2.38
XLGB-535	CC(=CCc1cc2c(cc1O)oc(=O)c1c2oc2c1ccc(c2)O)C	C20H16O5	336.34	25	17	0.15	2	5	2	97.53	83.81	3.15	4.69	4.61	2.88	4.56	3.98	-5.25	0.00189	5.61e-06	Moderately soluble	-6.18	0.000223	6.64e-07	Poorly soluble	-6.26	0.000183	5.43e-07	Poorly soluble	High	No	No	Yes	Yes	Yes	No	No	-5.02	0	0	0	0	0	0.55	0	2	1	3.4
XLGB-536	O=c1ccc2c(o1)cc1c(c2)cco1	C11H6O3	186.16	14	13	0	0	3	0	52.26	43.35	2.01	1.67	2.54	1.48	2.91	2.12	-2.73	0.344	0.00185	Soluble	-2.19	1.19	0.00639	Soluble	-4.5	0.00587	3.16e-05	Moderately soluble	High	Yes	No	Yes	No	No	No	No	-6.25	0	0	0	0	1	0.55	0	1	1	3.06
XLGB-537	C=C[C@@](/C=C/c1ccc(cc1)O)(CCC=C(C)C)C	C18H24O	256.38	19	6	0.33	6	1	1	85.42	20.23	3.54	6.12	5.24	4.59	5.1	4.92	-5.12	0.00193	7.54e-06	Moderately soluble	-6.33	0.000121	4.71e-07	Poorly soluble	-4.47	0.00865	3.37e-05	Moderately soluble	High	Yes	No	No	Yes	Yes	No	No	-3.52	1	0	0	0	2	0.55	0	1	1	3.13
XLGB-538	CC(=CCc1cc(ccc1O)c1coc2c(c1=O)ccc(c2)O)C	C20H18O4	322.35	24	16	0.15	3	4	2	95.69	70.67	3.03	4.4	4.38	2.2	4.69	3.74	-4.91	0.004	1.24e-05	Moderately soluble	-5.6	0.000808	2.51e-06	Moderately soluble	-6.22	0.000192	5.96e-07	Poorly soluble	High	Yes	No	Yes	No	Yes	No	Yes	-5.14	0	0	0	0	0	0.55	0	1	1	3.35
XLGB-539	O=Cc1cc(C(=O)C=Cc2ccc(cc2)O)c(cc1OC)O	C17H14O5	298.29	22	12	0.06	5	5	2	82.17	83.83	1.92	2.96	2.71	1.17	3.22	2.4	-3.63	0.0703	0.000236	Soluble	-4.38	0.0123	4.14e-05	Moderately soluble	-3.87	0.0402	0.000135	Soluble	High	No	No	Yes	No	Yes	No	Yes	-6.02	0	0	0	0	0	0.55	0	2	0	2.72
XLGB-540	O=C1C=C2CC(C3=CCOC3=C2C2=C3C(=COC12)C(CO3)O)C(O)(C)C	C20H20O6	356.37	26	0	0.45	1	6	2	91.13	85.22	2.48	-1.36	1.42	0.09	1.64	0.86	-1.13	26.6	0.0747	Very soluble	0.07	419	1.18	Highly soluble	-1.83	5.27	0.0148	Soluble	High	No	Yes	No	No	No	No	No	-9.44	0	0	0	0	0	0.55	0	0	1	5.36

## Sheet: EXD
Molecule	Canonical SMILES	Formula	MW	#Heavy atoms	#Aromatic heavy atoms	Fraction Csp3	#Rotatable bonds	#H-bond acceptors	#H-bond donors	MR	TPSA	iLOGP	XLOGP3	WLOGP	MLOGP	Silicos-IT Log P	Consensus Log P	ESOL Log S	ESOL Solubility (mg/ml)	ESOL Solubility (mol/l)	ESOL Class	Ali Log S	Ali Solubility (mg/ml)	Ali Solubility (mol/l)	Ali Class	Silicos-IT LogSw	Silicos-IT Solubility (mg/ml)	Silicos-IT Solubility (mol/l)	Silicos-IT class	GI absorption	BBB permeant	Pgp substrate	CYP1A2 inhibitor	CYP2C19 inhibitor	CYP2C9 inhibitor	CYP2D6 inhibitor	CYP3A4 inhibitor	log Kp (cm/s)	Lipinski #violations	Ghose #violations	Veber #violations	Egan #violations	Muegge #violations	Bioavailability Score	PAINS #alerts	Brenk #alerts	Leadlikeness #violations	Synthetic Accessibility
EXD-1	CCCCCCCCCCCCCCCC(=O)O	C16H32O2	256.42	18	0	0.94	14	2	1	80.8	37.3	3.85	7.17	5.55	4.19	5.25	5.2	-5.02	0.00243	9.49e-06	Moderately soluble	-7.77	4.31e-06	1.68e-08	Poorly soluble	-5.31	0.00125	4.88e-06	Moderately soluble	High	Yes	No	Yes	No	Yes	No	No	-2.77	1	0	1	0	1	0.85	0	0	2	2.31
EXD-2	O=C/C=C(\CCC=C(C)C)/C	C10H16O	152.23	11	0	0.5	4	1	0	49.44	17.07	2.47	3.03	2.88	2.49	2.65	2.71	-2.43	0.567	0.00373	Soluble	-3.05	0.134	0.000883	Soluble	-1.96	1.66	0.0109	Soluble	High	Yes	No	No	No	No	No	No	-5.08	0	1	0	0	2	0.55	0	3	1	2.49
EXD-3	CC[C@@H](C(C)C)CC[C@H]([C@H]1CC[C@@H]2[C@]1(C)CC[C@H]1[C@H]2CC=C2[C@]1(C)CC[C@@H](C2)O[C@@H]1O[C@H](CO)[C@H]([C@@H]([C@H]1O)O)O)C	C35H60O6	576.85	41	0	0.94	9	6	4	165.61	99.38	5.17	7.74	5.85	3.96	5.02	5.55	-7.7	1.15e-05	2e-08	Poorly soluble	-9.67	1.23e-07	2.14e-10	Poorly soluble	-4.4	0.0228	3.94e-05	Moderately soluble	Low	No	No	No	No	No	No	No	-4.32	1	4	0	0	1	0.55	0	1	3	8.02
EXD-4	CC[C@@H](C(C)C)CC[C@H]([C@H]1CC[C@@H]2[C@]1(C)CC[C@H]1[C@H]2CC=C2[C@]1(C)CC[C@@H](C2)O)C	C29H50O	414.71	30	0	0.93	6	1	1	133.23	20.23	5.05	9.34	8.02	6.73	7.04	7.24	-7.9	5.23e-06	1.26e-08	Poorly soluble	-9.67	8.9e-08	2.15e-10	Poorly soluble	-6.19	0.000269	6.49e-07	Poorly soluble	Low	No	No	No	No	No	No	No	-2.2	1	3	0	1	2	0.55	0	1	2	6.3
EXD-5	COc1cc(cc(c1O)OC)[C@H]1OC[C@H]2[C@@H]1CO[C@@H]2c1cc(OC)c(c(c1)OC)O	C22H26O8	418.44	30	12	0.45	6	8	2	107.89	95.84	3.52	2.23	2.56	0.56	2.78	2.33	-3.74	0.0763	0.000182	Soluble	-3.88	0.0554	0.000132	Soluble	-4.4	0.0167	3.98e-05	Moderately soluble	High	No	Yes	No	No	No	Yes	No	-7.27	0	0	0	0	0	0.55	0	0	1	4.36
EXD-6	CC[C@@H](C(C)C)/C=C/[C@H]([C@H]1CC[C@@H]2[C@]1(C)CC[C@H]1[C@H]2CC=C2[C@]1(C)CC[C@@H](C2)O)C	C29H48O	412.69	30	0	0.86	5	1	1	132.75	20.23	5.08	8.56	7.8	6.62	6.86	6.98	-7.46	1.43e-05	3.46e-08	Poorly soluble	-8.86	5.71e-07	1.38e-09	Poorly soluble	-5.47	0.0014	3.39e-06	Moderately soluble	Low	No	No	No	No	Yes	No	No	-2.74	1	3	0	1	2	0.55	0	1	2	6.21
EXD-7	CCCCCCCC/C=C\CCCCCCCC(=O)O	C18H34O2	282.46	20	0	0.83	15	2	1	89.94	37.3	4.27	7.64	6.11	4.57	5.95	5.71	-5.41	0.00109	3.85e-06	Moderately soluble	-8.26	1.54e-06	5.46e-09	Poorly soluble	-5.39	0.00114	4.04e-06	Moderately soluble	High	No	No	Yes	No	Yes	No	No	-2.6	1	1	1	1	1	0.85	0	1	2	3.07
EXD-8	O=CCc1ccccc1	C8H8O	120.15	9	6	0.12	2	1	0	36.42	17.07	1.33	1.78	1.43	1.78	2.34	1.73	-2.07	1.03	0.00856	Soluble	-1.76	2.1	0.0175	Very soluble	-2.7	0.239	0.00199	Soluble	High	Yes	No	Yes	No	No	No	No	-5.77	0	3	0	0	2	0.55	0	1	1	1
EXD-9	COc1cccc(c1)OC	C8H10O2	138.16	10	6	0.25	2	2	0	39.43	18.46	2.18	2.21	1.7	1.48	1.82	1.88	-2.4	0.549	0.00397	Soluble	-2.23	0.81	0.00586	Soluble	-2.62	0.329	0.00238	Soluble	High	Yes	No	Yes	No	No	No	No	-5.57	0	2	0	0	1	0.55	0	0	1	1.17
EXD-10	CCCCCCCCCCCCCCCCCC(=O)O	C18H36O2	284.48	20	0	0.94	16	2	1	90.41	37.3	4.3	8.23	6.33	4.67	6.13	5.93	-5.73	0.000526	1.85e-06	Moderately soluble	-8.87	3.8e-07	1.33e-09	Poorly soluble	-6.11	0.000219	7.71e-07	Poorly soluble	High	No	No	Yes	No	No	No	No	-2.19	1	1	1	1	2	0.85	0	0	2	2.54
EXD-11	CCCCCCCCCCCCCCCC(=O)OC	C17H34O2	270.45	19	0	0.94	15	2	0	85.12	26.3	4.41	7.38	5.64	4.44	5.84	5.54	-5.18	0.0018	6.67e-06	Moderately soluble	-7.76	4.68e-06	1.73e-08	Poorly soluble	-6.01	0.000264	9.75e-07	Poorly soluble	High	Yes	No	Yes	No	No	No	No	-2.71	1	1	1	0	1	0.55	0	0	2	2.53
EXD-12	CCCCCCCCCCCCCCCC(=O)OCC	C18H36O2	284.48	20	0	0.94	16	2	0	89.92	26.3	4.65	7.88	6.03	4.67	6.28	5.9	-5.51	0.000875	3.07e-06	Moderately soluble	-8.28	1.49e-06	5.24e-09	Poorly soluble	-6.41	0.00011	3.88e-07	Poorly soluble	High	No	No	Yes	No	No	No	No	-2.44	1	1	1	1	2	0.55	0	0	2	2.8
EXD-13	CCCCCCCCCCCCCC(=O)O	C14H28O2	228.37	16	0	0.93	12	2	1	71.18	37.3	3.32	6.11	4.77	3.69	4.37	4.45	-4.31	0.0111	4.86e-05	Moderately soluble	-6.67	4.83e-05	2.11e-07	Poorly soluble	-4.51	0.00712	3.12e-05	Moderately soluble	High	Yes	No	Yes	No	No	No	No	-3.35	0	0	1	0	1	0.85	0	0	3	2.09
EXD-14	CCCCCCCCCCCCCCC(=O)O	C15H30O2	242.4	17	0	0.93	13	2	1	75.99	37.3	3.66	6.63	5.16	3.94	4.81	4.84	-4.66	0.00528	2.18e-05	Moderately soluble	-7.21	1.48e-05	6.1e-08	Poorly soluble	-4.91	0.00298	1.23e-05	Moderately soluble	High	Yes	No	Yes	No	Yes	No	No	-3.07	0	0	1	0	1	0.85	0	0	3	2.2
EXD-15	CCCCCCCCCCCCCCCCC(=O)O	C17H34O2	270.45	19	0	0.94	15	2	1	85.6	37.3	4.11	7.69	5.94	4.44	5.69	5.57	-5.37	0.00115	4.25e-06	Moderately soluble	-8.31	1.31e-06	4.85e-09	Poorly soluble	-5.71	0.000524	1.94e-06	Moderately soluble	High	Yes	No	Yes	No	Yes	No	No	-2.49	1	1	1	1	1	0.85	0	0	2	2.42
EXD-16	CC[C@H](C(C)C)CC[C@H]([C@H]1CC[C@H]2[C@]1(C)CC[C@H]1[C@H]2CC=C2[C@]1(C)CC[C@H](C2)O)C	C29H50O	414.71	30	0	0.93	6	1	1	133.23	20.23	5.02	9.34	8.02	6.73	7.04	7.23	-7.9	5.23e-06	1.26e-08	Poorly soluble	-9.67	8.9e-08	2.15e-10	Poorly soluble	-6.19	0.000269	6.49e-07	Poorly soluble	Low	No	No	No	No	No	No	No	-2.2	1	3	0	1	2	0.55	0	1	2	6.3
EXD-17	Cc1ccccc1	C7H8	92.14	7	6	0.14	0	0	0	31.41	0	1.85	2.73	2	3.52	2.44	2.51	-2.77	0.158	0.00172	Soluble	-2.38	0.38	0.00413	Soluble	-2.69	0.188	0.00204	Soluble	Low	No	No	Yes	No	No	No	No	-4.92	0	3	0	0	2	0.55	0	0	1	1
EXD-18	Cc1nc(C)c(nc1C)C	C8H12N2	136.19	10	6	0.5	0	2	0	41.9	25.78	1.99	1.28	1.71	0.55	2.66	1.64	-1.93	1.58	0.0116	Very soluble	-1.42	5.17	0.0379	Very soluble	-3.17	0.0921	0.000676	Soluble	High	Yes	No	No	No	No	No	No	-6.22	0	1	0	0	1	0.55	0	0	1	1.83
EXD-19	COc1c(OC)cc(cc1OC)C	C10H14O3	182.22	13	6	0.4	3	3	0	50.88	27.69	2.56	1.82	2.02	1.49	2.31	2.04	-2.26	1	0.0055	Soluble	-2.02	1.73	0.00952	Soluble	-3.17	0.124	0.000681	Soluble	High	Yes	No	Yes	No	No	No	No	-6.12	0	0	0	0	1	0.55	0	0	1	1.48
EXD-20	CC(=CCC[C@H]([C@H]1CC[C@@]2([C@]1(C)CC[C@@]13[C@H]2CC[C@@H]2[C@]3(C1)CC[C@@H](C2(C)C)O)C)C)C	C30H50O	426.72	31	0	0.93	4	1	1	135.14	20.23	5.16	9.78	8.17	6.92	7.52	7.51	-8.38	1.77e-06	4.14e-09	Poorly soluble	-10.12	3.2e-08	7.5e-11	Insoluble	-6.87	5.77e-05	1.35e-07	Poorly soluble	Low	No	No	No	No	No	No	No	-1.96	1	3	0	1	2	0.55	0	1	2	6.51
EXD-21	Cn1cnc2c1c(=O)n(C)c(=O)n2C	C8H10N4O2	194.19	14	9	0.38	0	3	0	52.04	61.82	1.79	-0.07	-1.03	-0.19	-0.5	0	-1.48	6.5	0.0335	Very soluble	-0.78	32.5	0.167	Very soluble	-0.67	41.5	0.214	Soluble	High	No	No	No	No	No	No	No	-7.53	0	1	0	0	1	0.55	0	0	1	2.03
EXD-22	CCC(=O)/C=C/CC=C(C)C	C10H16O	152.23	11	0	0.5	4	1	0	49.44	17.07	2.61	2.8	2.88	2.49	2.65	2.69	-2.28	0.792	0.0052	Soluble	-2.82	0.233	0.00153	Soluble	-1.96	1.66	0.0109	Soluble	High	Yes	No	No	No	No	No	No	-5.24	0	1	0	0	2	0.55	0	2	1	2.64
EXD-23	COc1ccc(cc1O)/C=C/C(=O)c1c(O)cc(c(c1O)OC)O	C17H16O7	332.3	24	12	0.12	5	7	4	87.32	116.45	2.68	2.76	2.31	0.44	2.13	2.06	-3.68	0.0696	0.000209	Soluble	-4.86	0.00458	1.38e-05	Moderately soluble	-2.88	0.437	0.00132	Soluble	High	No	No	Yes	No	Yes	No	Yes	-6.37	0	0	0	0	0	0.55	0	1	0	2.99
EXD-24	OC[C@H]1O[C@H](Oc2c(OC)cc(cc2OC)[C@@H]2OC[C@H]3[C@@H]2CO[C@@H]3c2cc(OC)c(c(c2)OC)O[C@H]2O[C@H](CO)[C@H]([C@@H]([C@@H]2O)O)O)[C@H]([C@@H]([C@@H]1O)O)O	C34H46O18	742.72	52	12	0.65	12	18	8	172.13	254.14	3.02	-1.38	-2.5	-3.74	-1.4	-1.2	-2.95	0.825	0.00111	Soluble	-3.46	0.26	0.00035	Soluble	-0.78	124	0.166	Soluble	Low	No	Yes	No	No	No	No	No	-11.81	3	4	2	1	4	0.17	0	0	2	7.21
EXD-25	COC(=O)N1NONN(C1)C(=O)C	C5H10N4O4	190.16	13	0	0.6	3	6	2	54.05	83.14	1.4	-0.73	-2.79	-1.32	-2.51	-1.19	-0.36	82.8	0.435	Very soluble	-0.54	54.9	0.289	Very soluble	0.92	1570	8.24	Soluble	Low	No	No	No	No	No	No	No	-7.98	0	1	0	0	1	0.55	0	0	1	2.73
EXD-26	CCCCCCCCCCCCC[C@H](CCC(=O)O)C	C18H36O2	284.48	20	0	0.94	15	2	1	90.41	37.3	4.28	7.91	6.19	4.67	5.96	5.8	-5.6	0.000719	2.53e-06	Moderately soluble	-8.54	8.15e-07	2.87e-09	Poorly soluble	-5.74	0.000519	1.82e-06	Moderately soluble	High	No	No	Yes	No	Yes	No	No	-2.42	1	1	1	1	1	0.85	0	0	2	2.99
EXD-27	CCCCCCCCCCCCCCCCCCCCCCCCC[C@@H]([C@H](C(=O)C)C[C@H](OC)C)C	C34H68O2	508.9	36	0	0.97	29	2	0	166.84	26.3	8.04	14.89	11.63	7.14	12.83	10.91	-10.46	1.76e-08	3.45e-11	Insoluble	-15.55	1.42e-13	2.79e-16	Insoluble	-11.58	1.34e-09	2.62e-12	Insoluble	Low	No	Yes	No	No	No	No	No	1.17	2	4	1	1	2	0.17	0	0	3	5.67
EXD-28	Cc1ccc(o1)C=O	C6H6O2	110.11	8	5	0.17	1	2	0	29.06	30.21	1.33	0.67	1.4	-0.18	1.87	1.02	-1.34	5.02	0.0456	Very soluble	-0.88	14.5	0.132	Very soluble	-1.88	1.44	0.0131	Soluble	High	Yes	No	No	No	No	No	No	-6.5	0	3	0	0	1	0.55	0	1	1	2
EXD-29	COc1c(Cl)c(O[C@@H]2O[C@H](CO[C@@H]3OC[C@H]([C@@H]([C@H]3O)O)O)[C@H]([C@@H]([C@H]2O)O)O)c(c(c1Cl)C)Cl	C19H25Cl3O11	535.75	33	6	0.68	6	11	6	113.49	167.53	2.08	-0.1	-0.39	-0.95	0.2	0.17	-2.84	0.779	0.00145	Soluble	-2.97	0.58	0.00108	Soluble	-1.16	37.2	0.0693	Soluble	Low	No	Yes	No	No	No	No	No	-9.64	3	1	1	1	3	0.17	0	0	1	5.5
EXD-30	COc1c(Cl)c(C)c(c(c1Cl)O)Cl	C8H7Cl3O2	241.5	13	6	0.25	1	2	1	54.95	29.46	2.39	3.79	3.67	3.2	3.74	3.36	-4	0.0241	9.99e-05	Moderately soluble	-4.1	0.0191	7.89e-05	Moderately soluble	-4.19	0.0155	6.43e-05	Moderately soluble	High	Yes	No	Yes	No	Yes	No	No	-5.08	0	0	0	0	0	0.55	0	0	2	1.64
EXD-31	OC[C@H]1O[C@@H](O[C@H]2CC[C@]34[C@@H](C2(C)C)CC[C@@H]2[C@@]4(C3)[C@H](O)C[C@]3([C@@]2(C)C[C@@H]([C@@H]3[C@@H](CCC(=O)C(C)C)C)O)C)[C@@H]([C@H]([C@@H]1O)O)O[C@@H]1O[C@@H](C)[C@@H]([C@H]([C@H]1O)O)O	C42H70O13	783	55	0	0.98	10	13	8	201.74	215.83	3.91	2.77	2.05	0.18	2	2.18	-5.78	0.0013	1.66e-06	Moderately soluble	-6.96	8.62e-05	1.1e-07	Poorly soluble	-2.05	7.03	0.00897	Soluble	Low	No	Yes	No	No	No	No	No	-9.11	3	3	1	1	4	0.17	0	1	2	9.69
EXD-32	O=C(C(C)C)CC[C@H]([C@H]1[C@@H](O)C[C@@]2([C@]1(C)C[C@@H](O)[C@@]13[C@H]2CC[C@H]2[C@]3(C1)CC[C@@H](C2(C)C)O)C)C	C30H50O4	474.72	34	0	0.97	5	4	3	138.14	77.76	4.28	5.45	5.37	4.27	5.46	4.97	-5.89	0.000616	1.3e-06	Moderately soluble	-6.84	6.87e-05	1.45e-07	Poorly soluble	-5.12	0.00362	7.62e-06	Moderately soluble	High	No	Yes	No	No	No	No	No	-5.33	1	2	0	0	1	0.55	0	0	2	6.44
EXD-33	OC[C@H]1O[C@@H](Oc2ccc(cc2COC(=O)c2c(O)cccc2OC)O)[C@@H]([C@H]([C@@H]1O)O)O	C21H24O11	452.41	32	12	0.38	8	11	6	106.89	175.37	1.32	0.92	-0.51	-1.1	-0.17	0.09	-2.97	0.48	0.00106	Soluble	-4.19	0.0293	6.48e-05	Moderately soluble	-1.68	9.43	0.0208	Soluble	Low	No	Yes	No	No	No	No	No	-8.41	2	1	1	1	3	0.17	0	0	2	4.94
EXD-34	COc1cccc(c1C(=O)OCc1cc(O)ccc1O)O	C15H14O6	290.27	21	12	0.13	5	6	3	74.77	96.22	2.11	2.73	2.02	1.37	1.87	2.02	-3.45	0.102	0.000353	Soluble	-4.4	0.0114	3.94e-05	Moderately soluble	-3.4	0.114	0.000394	Soluble	High	No	No	No	No	Yes	No	No	-6.13	0	0	0	0	0	0.55	0	1	0	2.17
EXD-35	OC[C@H]1O[C@@H](Oc2ccc(cc2COC(=O)c2c(OC)cccc2OC)O)[C@@H]([C@H]([C@@H]1O)O)O	C22H26O11	466.44	33	12	0.41	9	11	5	111.36	164.37	2.71	0.7	-0.21	-0.88	0.38	0.54	-2.85	0.662	0.00142	Soluble	-3.73	0.087	0.000186	Soluble	-2.37	1.99	0.00428	Soluble	Low	No	Yes	No	No	No	No	No	-8.65	1	0	1	1	2	0.55	0	0	2	5.05
EXD-36	CC(C1=CC[C@]([C@H]2[C@@H](C1)[C@@](C)(O)CC2)(C)O)C	C15H26O2	238.37	17	0	0.87	1	2	2	71.92	40.46	2.92	2.19	2.89	2.74	2.71	2.69	-2.63	0.557	0.00234	Soluble	-2.67	0.506	0.00212	Soluble	-2.38	0.998	0.00419	Soluble	High	Yes	No	No	No	No	No	No	-6.2	0	0	0	0	0	0.55	0	1	1	4.65
EXD-37	COc1cc2c(cc1Oc1cc(OC)c(cc1C[C@@H]1N(C)CCc3c1cc(OC)c(c3OC)OC)OC)C[C@H]1c3c2c(OC)c(OC)c(c3CCN1C)OC	C43H52N2O10	756.88	55	24	0.44	13	12	0	217.45	98.78	6.81	6.62	5.67	2.31	7.59	5.8	-8.17	5.14e-06	6.79e-09	Poorly soluble	-8.5	2.42e-06	3.2e-09	Poorly soluble	-11.63	1.77e-09	2.34e-12	Insoluble	High	No	No	No	No	No	No	No	-6.22	2	4	1	0	3	0.17	0	0	3	6.54
EXD-38	COc1cccc(c1C(=O)OCc1cc(O)ccc1O)OC	C16H16O6	304.29	22	12	0.19	6	6	2	79.24	85.22	2.51	2.5	2.32	1.62	2.4	2.27	-3.31	0.149	0.000491	Soluble	-3.94	0.0353	0.000116	Soluble	-4.1	0.0241	7.93e-05	Moderately soluble	High	No	No	Yes	No	No	No	No	-6.38	0	0	0	0	0	0.55	0	1	0	2.29
EXD-39	CN(C(=O)CCC(=O)N(C)C)C	C8H16N2O2	172.22	12	0	0.75	5	2	0	46.76	40.62	2	-0.91	-0.06	0.12	-0.35	0.16	0	170	0.99	Very soluble	0.54	597	3.47	Highly soluble	-0.8	27	0.157	Soluble	High	No	No	No	No	No	No	No	-8	0	0	0	0	1	0.55	0	0	1	1.28
EXD-40	COC(=O)N(C(=O)C)O	C4H7NO4	133.1	9	0	0.5	3	4	1	26.84	66.84	0.98	-0.58	-0.01	-0.56	-1.55	-0.34	-0.1	105	0.791	Very soluble	-0.35	59	0.444	Very soluble	0.98	1270	9.55	Soluble	High	No	No	No	No	No	No	No	-7.52	0	3	0	0	2	0.55	0	2	1	1.92
EXD-41	COc1ccc2c(c1Br)cccc2	C11H9BrO	237.09	13	10	0.09	1	1	0	58.14	9.23	2.57	3.83	3.61	3.52	3.63	3.43	-4.23	0.0141	5.94e-05	Moderately soluble	-3.72	0.0452	0.000191	Soluble	-5.06	0.00207	8.73e-06	Moderately soluble	High	Yes	No	Yes	Yes	Yes	No	No	-5.03	0	0	0	0	1	0.55	0	0	2	1.34
EXD-42	OC[C@H]1O[C@@H](Oc2cc(C)cc(c2)O)[C@@H]([C@H]([C@@H]1O)O)O	C13H18O7	286.28	20	6	0.54	3	7	5	67.58	119.61	1.24	-0.46	-1.12	-1.21	-0.72	-0.45	-1.35	12.8	0.0448	Very soluble	-1.59	7.43	0.026	Very soluble	-0.03	270	0.942	Soluble	High	No	No	No	No	No	No	No	-8.37	0	1	0	0	0	0.55	0	0	0	4.28
EXD-43	Cc1cc(O)cc(c1)O	C7H8O2	124.14	9	6	0.14	0	2	2	35.45	40.46	1.19	1.58	1.41	1.15	1.35	1.33	-2.1	0.99	0.00797	Soluble	-2.04	1.13	0.00911	Soluble	-1.59	3.19	0.0257	Soluble	High	Yes	No	No	No	No	No	Yes	-5.94	0	3	0	0	1	0.55	0	0	1	1
EXD-44	COc1ccc2c(c1)c(=O)c1c(o2)c(OC)c(c(c1)OC)OC	C17H16O6	316.31	23	14	0.24	4	6	0	85.96	67.13	3.44	2.85	2.98	0.77	3.57	2.72	-3.78	0.0521	0.000165	Soluble	-3.92	0.0382	0.000121	Soluble	-5.78	0.000526	1.66e-06	Moderately soluble	High	Yes	No	Yes	Yes	Yes	Yes	Yes	-6.21	0	0	0	0	0	0.55	0	1	0	3.39
EXD-45	O[C@@H]1C=C2CCN3[C@@H]2[C@@H]([C@H]1O)c1cc2OCOc2cc1C3	C16H17NO4	287.31	21	6	0.5	0	5	2	78.4	62.16	1.65	-0.02	0.22	1.08	0.86	0.76	-1.82	4.35	0.0151	Very soluble	-0.84	41.9	0.146	Very soluble	-1.65	6.43	0.0224	Soluble	High	No	Yes	No	No	No	Yes	No	-8.07	0	0	0	0	0	0.55	0	1	0	4.2
EXD-46	C[C@H]1CC[C@]2(OC1)O[C@@H]1[C@H]([C@@H]2C)[C@]2([C@H](C1)[C@@H]1CC=C3[C@@]([C@H]1CC2)(C)C[C@@H]([C@H](C3)O)O)C	C27H42O4	430.62	31	0	0.93	0	4	2	122.76	58.92	3.83	4.7	4.68	4.09	3.39	4.14	-5.47	0.00146	3.38e-06	Moderately soluble	-5.67	0.00093	2.16e-06	Moderately soluble	-3.67	0.0919	0.000213	Soluble	High	Yes	Yes	No	No	No	No	No	-5.59	0	1	0	0	0	0.55	0	1	2	7.06
EXD-47	Cc1cc(cc(c1)O)O[C@H]1O[C@H](CO[C@H]2OC[C@H]([C@H]([C@@H]2O)O)O)[C@H]([C@@H]([C@@H]1O)O)O	C18H26O11	418.39	29	6	0.67	5	11	7	93.99	178.53	1.35	-2.31	-2.66	-2.66	-2.3	-1.71	-0.8	66	0.158	Very soluble	-0.9	52.3	0.125	Very soluble	1.27	7720	18.5	Soluble	Low	No	No	No	No	No	No	No	-10.49	2	1	1	1	4	0.17	0	0	1	5.3
EXD-48	OC[C@H]1O[C@H](OC[C@H]2O[C@H](Oc3cc(OC)c(c(c3Cl)C)Cl)[C@H]([C@H]([C@@H]2O)O)O)[C@H]([C@@H]([C@@H]1O)O)O	C20H28Cl2O12	531.34	34	6	0.7	7	12	7	114.45	187.76	2	-0.79	-1.69	-1.97	-0.94	-0.68	-2.31	2.63	0.00495	Soluble	-2.67	1.12	0.00212	Soluble	-0.15	378	0.711	Soluble	Low	No	No	No	No	No	No	No	-10.1	3	2	1	1	3	0.17	0	0	1	5.71
EXD-49	COc1cc(O)c(c(c1Cl)C)Cl	C8H8Cl2O2	207.05	12	6	0.25	1	2	1	49.94	29.46	2.01	3.16	3.02	2.64	3.08	2.78	-3.42	0.079	0.000381	Soluble	-3.45	0.0736	0.000356	Soluble	-3.58	0.055	0.000265	Soluble	High	Yes	No	Yes	No	No	No	No	-5.32	0	0	0	0	0	0.55	0	0	1	1.6
EXD-50	COc1cc(O[C@H]2O[C@H](CO[C@H]3OC[C@@]([C@H]3O)(O)CO)[C@H]([C@@H]([C@@H]2O)O)O)c(c(c1Cl)C)Cl	C19H26Cl2O11	501.31	32	6	0.68	7	11	6	108.52	167.53	1.65	-0.42	-1.05	-1.44	0.1	-0.23	-2.36	2.19	0.00436	Soluble	-2.63	1.17	0.00233	Soluble	-1.16	34.8	0.0693	Soluble	Low	No	Yes	No	No	No	No	No	-9.66	3	2	1	1	3	0.17	0	0	1	5.43
EXD-51	OC[C@H]1O[C@H](O[C@H]2CC[C@@]34[C@@H](C2(C)C)CC[C@@H]2[C@@]4(C3)[C@@H](O)C[C@@]3([C@]2(C)C[C@H]([C@@H]3[C@@H](CCC(=O)C(C)C)C)O)C)[C@H]([C@H]([C@@H]1O)O)O	C36H60O9	636.86	45	0	0.97	8	9	6	170.52	156.91	3.95	3.86	3.19	1.77	3.44	3.24	-5.69	0.00129	2.03e-06	Moderately soluble	-6.85	8.96e-05	1.41e-07	Poorly soluble	-3.31	0.31	0.000488	Soluble	Low	No	Yes	No	No	No	No	No	-7.44	2	3	1	1	3	0.17	0	1	3	8.6
EXD-52	O=C(C(C)C)CC[C@H]([C@H]1[C@H](O)C[C@]2([C@@]1(C)C[C@H](O)[C@@]13[C@H]2CC[C@H]2[C@@]3(C1)CC[C@@H](C2(C)C)O)C)C	C30H50O4	474.72	34	0	0.97	5	4	3	138.14	77.76	4.17	5.45	5.37	4.27	5.46	4.94	-5.89	0.000616	1.3e-06	Moderately soluble	-6.84	6.87e-05	1.45e-07	Poorly soluble	-5.12	0.00362	7.62e-06	Moderately soluble	High	No	Yes	No	No	No	No	No	-5.33	1	2	0	0	1	0.55	0	0	2	6.44
EXD-53	CC(C(=O)CC[C@H]([C@H]1[C@H](O[C@H]2OC[C@H]([C@@H]([C@@H]2O)O)O)C[C@]2([C@@]1(C)C[C@H](O)[C@@]13[C@H]2CC[C@H]2[C@@]3(C1)CC[C@@H](C2(C)C)O)C)C)C	C35H58O8	606.83	43	0	0.97	7	8	5	164.55	136.68	3.7	3.93	3.83	2.37	3.9	3.55	-5.62	0.00147	2.42e-06	Moderately soluble	-6.5	0.000192	3.16e-07	Poorly soluble	-3.75	0.107	0.000176	Soluble	Low	No	Yes	No	No	No	No	No	-7.21	1	3	0	1	1	0.55	0	0	2	8.39
EXD-54	OC[C@H]1O[C@H](O[C@H]2CC[C@@]34[C@@H](C2(C)C)CC[C@@H]2[C@@]4(C3)[C@@H](O)C[C@@]3([C@]2(C)C[C@H]([C@@H]3[C@@H](CCC(=O)C(C)C)C)O[C@H]2OC[C@H]([C@@H]([C@@H]2O)O)O)C)[C@H]([C@H]([C@@H]1O)O)O	C41H68O13	768.97	54	0	0.98	10	13	8	196.94	215.83	3.87	2.33	1.66	0.01	1.86	1.94	-5.42	0.00295	3.84e-06	Moderately soluble	-6.5	0.000242	3.15e-07	Poorly soluble	-1.91	9.42	0.0122	Soluble	Low	No	Yes	No	No	No	No	No	-9.34	3	3	1	1	4	0.17	0	1	2	9.48
EXD-55	OC[C@H]1O[C@H](O[C@H]2CC[C@@]34[C@@H](C2(C)C)CC[C@@H]2[C@@]4(C3)[C@@H](O)C[C@@]3([C@]2(C)C[C@H]([C@@H]3[C@@H](CCC(=O)C(C)C)C)O)C)[C@H]([C@@H]([C@@H]1O)O)O[C@H]1O[C@H](CO)[C@H]([C@@H]([C@@H]1O)O)O	C42H70O14	799	56	0	0.98	11	14	9	202.91	236.06	3.38	2.27	1.02	-0.57	1.4	1.5	-5.5	0.00254	3.18e-06	Moderately soluble	-6.86	0.000109	1.37e-07	Poorly soluble	-1.46	27.5	0.0344	Soluble	Low	No	Yes	No	No	No	No	No	-9.56	3	3	2	1	4	0.17	0	1	2	9.74
EXD-56	OC[C@H]1O[C@H](O[C@H]2CC[C@@]34[C@@H](C2(C)C)CC[C@@H]2[C@@]4(C3)[C@@H](O)C[C@@]3([C@]2(C)C[C@H]([C@@H]3[C@@H](CCC(=O)C(C)C)C)O[C@H]2OC[C@H]([C@@H]([C@@H]2O)O)O)C)[C@H]([C@@H]([C@@H]1O)O)O[C@H]1O[C@H](CO)[C@H]([C@@H]([C@@H]1O)O)O	C47H78O18	931.11	65	0	0.98	13	18	11	229.32	294.98	4.17	0.74	-0.52	-2.27	-0.2	0.39	-5.22	0.0056	6.01e-06	Moderately soluble	-6.51	0.000285	3.06e-07	Poorly soluble	-0.04	853	0.916	Soluble	Low	No	Yes	No	No	No	No	No	-11.45	3	4	2	1	5	0.17	0	1	2	10
[truncated: 696 more rows]
